# Supplementary material
Source: MDPI journal article supplement (https://www.mdpi.com/1999-4907/15/3/512)
Supplement: s1 [file s1]

Archive with 11 entries (11 files):
- Figure S1.pdf
- Figure S2.pdf
- Figure S3.pdf
- Figure S4.pdf
- Figure S5.pdf
- Figure S6.pdf
- Figure S7.pdf
- Figure S8.pdf
- Figure S9.pdf
- Supplemental Figure Caption.pdf
- Supplemental Table.xlsx
