# Supplementary material
Source: MDPI journal article supplement (https://www.mdpi.com/1999-4907/15/3/512)
Supplement: s1 [file s1 › Supplemental Table.xlsx]

## Sheet: Table S1
Table S1: Statistical data of scRNA-seq.
Sample	Estimated Number of Cells	Fraction Reads in Cells	Mean Reads per Cell	Median Genes per Cell	Total Genes Detected	Median UMI Counts per Cell	Number of Reads	Mean Reads per Cell	Valid Barcodes	Q30 Bases in Barcode	Q30 Bases in RNA Read	Q30 Bases in Sample Index	Q30 Bases in UMI	Reads Mapped Confidently to Transcriptome	Reads Mapped Confidently to Exonic Regions	Reads Mapped Confidently to Intronic Regions	Reads Mapped Confidently to Intergenic Regions	Sequencing Saturation
N2	17768	0.765	54221	2124	54420	4731	963416300	54221	0.971	0.94	0.927	0.929	0.929	0.328	0.386	0.037	0.35	0.461
L2	5846	0.656	146263	1262	47498	2587	855056038	146263	0.943	0.916	0.905	0.904	0.904	0.229	0.265	0.025	0.372	0.82

## Sheet: Table S2
Table S2: List of poplar cell type-specific marker genes, generated by evaluating the expression of poplar homologous to Arabidopsis markers for the different domains of the leaves
Gene	Symbol	Gene (Arabidopsis)	Tissue	Cell Type	DOI	Description
Pop_A04G060319	AHP5	AT1G03430	Leaf	Bundle sheath	10.1093/plcell/koaa060	histidine-containing phosphotransfer protein 2 [Populus trichocarpa]
Pop_A13G082725	---	AT1G24160	Leaf	Bundle sheath	10.1093/plcell/koaa060	uncharacterized protein LOC18104333 isoform X2 [Populus trichocarpa]
Pop_A08G086536	WEI7	AT1G25220	Leaf	Bundle sheath	10.1093/plcell/koaa060	PREDICTED: anthranilate synthase beta subunit 2, chloroplastic-like [Populus euphratica]
Pop_A04G019534	---	AT1G28310	Leaf	Bundle sheath	10.1093/plcell/koaa060	PREDICTED: dof zinc finger protein DOF1.4-like [Populus euphratica]
Pop_A02G088743	---	AT1G36940	Leaf	Bundle sheath	10.1093/plcell/koaa060	uncharacterized protein LOC7495121 [Populus trichocarpa]
Pop_A05G072036	---	AT1G54820	Leaf	Bundle sheath	10.1093/plcell/koaa060	PREDICTED: serine/threonine-protein kinase CDL1-like [Populus euphratica]
Pop_A08G086529	ZFP4	AT1G66140	Leaf	Bundle sheath	10.1093/plcell/koaa060	zinc finger protein 4 [Populus trichocarpa]
Pop_A08G063708	---	AT1G69420	Leaf	Bundle sheath	10.1093/plcell/koaa060	probable protein S-acyltransferase 22 [Populus trichocarpa]
Pop_A06G061500	---	AT2G07180	Leaf	Bundle sheath	10.1093/plcell/koaa060	probable serine/threonine-protein kinase PBL17 isoform X1 [Populus trichocarpa]
Pop_A02G031386	ATAGP26	AT2G47930	Leaf	Bundle sheath	10.1093/plcell/koaa060	classical arabinogalactan protein 26 [Populus trichocarpa]
Pop_A02G032999	---	AT3G07340	Leaf	Bundle sheath	10.1093/plcell/koaa060	PREDICTED: transcription factor bHLH62 [Populus euphratica]
Pop_A10G069209	HCF107	AT3G17040	Leaf	Bundle sheath	10.1093/plcell/koaa060	protein high chlorophyll fluorescent 107 [Populus trichocarpa]
Pop_A05G071680	PUB25	AT3G19380	Leaf	Bundle sheath	10.1093/plcell/koaa060	PREDICTED: U-box domain-containing protein 25-like isoform X1 [Populus euphratica]
Pop_A06G062377	UGT71B1	AT3G21750	Leaf	Bundle sheath	10.1093/plcell/koaa060	anthocyanidin 3-O-glucosyltransferase 6 isoform X1 [Populus trichocarpa]
Pop_A17G081417	---	AT3G23570	Leaf	Bundle sheath	10.1093/plcell/koaa060	hypothetical protein POPTR_017G048100, partial [Populus trichocarpa]
Pop_A08G046384	RNR2A	AT3G23580	Leaf	Bundle sheath	10.1093/plcell/koaa060	ribonucleoside-diphosphate reductase small chain A isoform X1 [Populus trichocarpa]
Pop_A01G058768	---	AT3G28050	Leaf	Bundle sheath	10.1093/plcell/koaa060	WAT1-related protein At3g28050 [Populus trichocarpa]
Pop_A04G010954	PHS1	AT3G29320	Leaf	Bundle sheath	10.1093/plcell/koaa060	alpha-1,4 glucan phosphorylase L isozyme, chloroplastic/amyloplastic isoform X3 [Populus trichocarpa]
Pop_A05G073058	SNP2	AT3G50660	Leaf	Bundle sheath	10.1093/plcell/koaa060	cytochrome P450 90B1 isoform X1 [Populus trichocarpa]
Pop_A06G089421	---	AT3G55960	Leaf	Bundle sheath	10.1093/plcell/koaa060	CTD nuclear envelope phosphatase 1 homolog [Populus trichocarpa]
Pop_A02G066257	---	AT3G60320	Leaf	Bundle sheath	10.1093/plcell/koaa060	PREDICTED: protein virilizer homolog [Populus euphratica]
Pop_A02G031382	TIR1	AT3G62980	Leaf	Bundle sheath	10.1093/plcell/koaa060	transport inhibitor response 1 family protein [Populus tomentosa]
Pop_A04G018340	CPK21	AT4G04720	Leaf	Bundle sheath	10.1093/plcell/koaa060	PREDICTED: calcium-dependent protein kinase-like [Populus euphratica]
Pop_A08G046165	AtAARE	AT4G14570	Leaf	Bundle sheath	10.1093/plcell/koaa060	hypothetical protein [Populus tomentosa]
Pop_A01G004047	PUP10	AT4G18210	Leaf	Bundle sheath	10.1093/plcell/koaa060	probable purine permease 11 isoform X1 [Populus trichocarpa]
Pop_A01G059995	---	AT4G22990	Leaf	Bundle sheath	10.1093/plcell/koaa060	SPX domain-containing membrane protein At4g22990 [Populus trichocarpa]
Pop_A03G014972	---	AT4G30020	Leaf	Bundle sheath	10.1093/plcell/koaa060	PREDICTED: uncharacterized protein LOC105124272 [Populus euphratica]
Pop_A07G022676	---	AT4G34760	Leaf	Bundle sheath	10.1093/plcell/koaa060	auxin-responsive protein SAUR50 [Populus trichocarpa]
Pop_A01G032126	---	AT5G14210	Leaf	Bundle sheath	10.1093/plcell/koaa060	probable inactive leucine-rich repeat receptor-like protein kinase At3g03770 [Populus trichocarpa]
Pop_A12G019303	TRP1	AT5G17990	Leaf	Bundle sheath	10.1093/plcell/koaa060	anthranilate phosphoribosyltransferase, chloroplastic isoform X1 [Populus trichocarpa];PREDICTED: anthranilate phosphoribosyltransferase, chloroplastic-like isoform X1 [Populus euphratica]
Pop_G10G000147	---	AT5G19120	Leaf	Bundle sheath	10.1093/plcell/koaa060	hypothetical protein POPTR_010G110600 [Populus trichocarpa]
Pop_A05G011520	SCPL34	AT5G23210	Leaf	Bundle sheath	10.1093/plcell/koaa060	serine carboxypeptidase-like 34 [Populus trichocarpa]
Pop_A05G016914	---	AT5G26600	Leaf	Bundle sheath	10.1093/plcell/koaa060	probable L-cysteine desulfhydrase, chloroplastic [Populus trichocarpa]
Pop_A06G062111	---	AT5G41920	Leaf	Bundle sheath	10.1093/plcell/koaa060	scarecrow-like protein 23 [Populus trichocarpa]
Pop_A02G088655	AFB5	AT5G49980	Leaf	Bundle sheath	10.1093/plcell/koaa060	transport inhibitor response 1-like protein [Populus trichocarpa]
Pop_A12G007845	---	AT5G51560	Leaf	Bundle sheath	10.1093/plcell/koaa060	PREDICTED: probable LRR receptor-like serine/threonine-protein kinase At1g34110 [Populus euphratica]
Pop_A05G071677	SUPO1	AT5G63980	Leaf	Bundle sheath	10.1093/plcell/koaa060	PREDICTED: SAL1 phosphatase [Populus euphratica]
Pop_A03G050544	SLK2	AT5G62090	Shoot apical	Carpel margin meristem	10.1104/pp.109.146183	probable transcriptional regulator SLK2 [Populus trichocarpa]
Pop_A02G012441	KCS1	AT1G01120	Leaf	Epidermis	10.1093/plcell/koaa060	3-ketoacyl-CoA synthase 1 [Populus trichocarpa]
Pop_A02G012435	---	AT1G01180	Leaf	Epidermis	10.1093/plcell/koaa060	uncharacterized protein LOC7487733 [Populus trichocarpa]
Pop_A02G012384	---	AT1G01250	Leaf	Epidermis	10.1093/plcell/koaa060	PREDICTED: ethylene-responsive transcription factor ERF023-like [Populus euphratica]
Pop_A02G012346	TBL25	AT1G01430	Leaf	Epidermis	10.1093/plcell/koaa060	PREDICTED: protein trichome birefringence-like 25 isoform X1 [Populus euphratica]
Pop_A02G012290	AN	AT1G01510	Leaf	Epidermis	10.1111/j.1365-313X.2009.04050.x	C-terminal binding protein AN [Populus trichocarpa]
Pop_A01G074872	---	AT1G01630	Leaf	Epidermis	10.1093/plcell/koaa060	PREDICTED: random slug protein 5-like [Populus euphratica]
Pop_A02G066262	VAD1	AT1G02120	Leaf	Epidermis	10.1093/plcell/koaa060	protein VASCULAR ASSOCIATED DEATH 1, chloroplastic isoform X5 [Populus trichocarpa]
Pop_A14G045307	CER1	AT1G02205	Leaf	Epidermis	10.1104/pp.111.172320	protein ECERIFERUM 1 isoform X1 [Populus trichocarpa]
Pop_A14G045307	CER1	AT1G02205	Leaf	Epidermis	10.1093/plcell/koaa060	protein ECERIFERUM 1 isoform X1 [Populus trichocarpa]
Pop_A02G086819	NLA	AT1G02860	Leaf	Epidermis	10.1093/plcell/koaa060	probable E3 ubiquitin-protein ligase BAH1-like 1 [Populus trichocarpa]
Pop_A02G086814	TPK1	AT1G02880	Leaf	Epidermis	10.1093/plcell/koaa060	thiamine pyrophosphokinase 1 isoform X2 [Populus trichocarpa];thiamine pyrophosphokinase 1 isoform X5 [Populus trichocarpa]
Pop_A02G005406	---	AT1G03220	Leaf	Epidermis	10.1093/plcell/koaa060	basic 7S globulin [Populus trichocarpa]
Pop_A02G033055	---	AT1G04040	Leaf	Epidermis	10.1093/plcell/koaa060	acid phosphatase 1 [Populus trichocarpa]
Pop_A02G065308	KCS2	AT1G04220	Leaf	Epidermis	10.1093/plcell/koaa060	hypothetical protein POPTR_002G046100, partial [Populus trichocarpa]
Pop_A01G003905	IAA17	AT1G04250	Leaf	Epidermis	10.1093/plcell/koaa060	auxin-induced protein IAA4 [Populus tomentosa]
Pop_A08G046139	---	AT1G04280	Leaf	Epidermis	10.1093/plcell/koaa060	PREDICTED: uncharacterized protein LOC105129489 isoform X3 [Populus euphratica]
Pop_A02G065220	---	AT1G04430	Leaf	Epidermis	10.1093/plcell/koaa060	PREDICTED: probable methyltransferase PMT3 [Populus euphratica]
Pop_A01G010383	---	AT1G04880	Shoot apical	Epidermis	10.1007/s00018-018-2980-z	high mobility group B protein 15 [Populus trichocarpa]
Pop_A02G023849	HDG2	AT1G05230	Leaf	Epidermis	10.1093/plcell/koaa060	homeobox-leucine zipper protein HDG2 isoform X2 [Populus trichocarpa]
Pop_A02G065294	PLA-I{gamma}1	AT1G06800	Leaf	Epidermis	10.1093/plcell/koaa060	phospholipase A1-Igamma1, chloroplastic [Populus trichocarpa]
Pop_A01G003860	FATB	AT1G08510	Leaf	Epidermis	10.1093/plcell/koaa060	palmitoyl-acyl carrier protein thioesterase, chloroplastic [Populus trichocarpa]
Pop_A05G016828	---	AT1G09310	Leaf	Epidermis	10.1093/plcell/koaa060	uncharacterized protein LOC7455188 [Populus trichocarpa]
Pop_A02G066387	---	AT1G10150	Leaf	Epidermis	10.1093/plcell/koaa060	PREDICTED: protein PHLOEM PROTEIN 2-LIKE A10-like [Populus euphratica]
Pop_A04G018207	---	AT1G11410	Leaf	Epidermis	10.1093/plcell/koaa060	PREDICTED: G-type lectin S-receptor-like serine/threonine-protein kinase RKS1 [Populus euphratica]
Pop_A02G005508	SBH2	AT1G14290	Leaf	Epidermis	10.1093/plcell/koaa060	sphinganine C4-monooxygenase 1 [Populus trichocarpa]
Pop_A03G049830	---	AT1G15260	Leaf	Epidermis	10.1093/plcell/koaa060	hypothetical protein POPTR_003G053600 [Populus trichocarpa]
Pop_A01G015644	---	AT1G17147	Leaf	Epidermis	10.1093/plcell/koaa060	VQ motif-containing protein 1 [Populus trichocarpa]
Pop_A01G024911	---	AT1G17200	Leaf	Epidermis	10.1093/plcell/koaa060	CASP-like protein 2A2 [Populus trichocarpa]
Pop_A01G010418	WBC11	AT1G17840	Leaf	Epidermis	10.1093/plcell/koaa060	ABC transporter G family member 11-like isoform X1 [Populus trichocarpa]
Pop_A14G029779	CPK10	AT1G18890	Leaf	Epidermis	10.1093/plcell/koaa060	uncharacterized protein LOC18104906 [Populus trichocarpa]
Pop_A02G004947	TUB5	AT1G20010	Leaf	Epidermis	10.1093/plcell/koaa060	tubulin beta chain [Populus trichocarpa]
Pop_A05G057092	---	AT1G20823	Leaf	Epidermis	10.1093/plcell/koaa060	RING-H2 finger protein ATL8 [Populus trichocarpa]
Pop_A05G057047	---	AT1G21010	Leaf	Epidermis	10.1093/plcell/koaa060	uncharacterized protein LOC7479117 [Populus trichocarpa]
Pop_A05G057123	---	AT1G21050	Leaf	Epidermis	10.1093/plcell/koaa060	PREDICTED: protein MIZU-KUSSEI 1 [Populus euphratica]
Pop_A02G065582	SWEET1	AT1G21460	Leaf	Epidermis	10.1093/plcell/koaa060	PREDICTED: bidirectional sugar transporter SWEET1-like [Populus euphratica]
Pop_A02G088676	---	AT1G21830	Leaf	Epidermis	10.1093/plcell/koaa060	uncharacterized protein LOC7466471 isoform X1 [Populus trichocarpa]
Pop_A02G088696	DREB26	AT1G21910	Leaf	Epidermis	10.1093/plcell/koaa060	PREDICTED: ethylene-responsive transcription factor ERF014-like [Populus euphratica]
Pop_A01G032324	PIP5K1	AT1G21980	Leaf	Epidermis	10.1093/plcell/koaa060	phosphatidylinositol 4-phosphate 5-kinase 1 isoform X1 [Populus trichocarpa]
Pop_A05G056014	---	AT1G22160	Leaf	Epidermis	10.1093/plcell/koaa060	uncharacterized protein LOC7468909 [Populus trichocarpa]
Pop_A02G088605	---	AT1G22330	Leaf	Epidermis	10.1093/plcell/koaa060	RNA-binding protein 38 [Populus trichocarpa]
Pop_A01G010406	UGT85A2	AT1G22360	Leaf	Epidermis	10.1093/plcell/koaa060	PREDICTED: 7-deoxyloganetin glucosyltransferase-like [Populus euphratica]
Pop_A02G012397	MYB3	AT1G22640	Leaf	Epidermis	10.1093/plcell/koaa060	PREDICTED: myb-related protein 308-like [Populus euphratica]
Pop_G01G067717	PIN7	AT1G23080	Leaf	Epidermis	10.1093/plcell/koaa060	hypothetical protein POPTR_001G205200 [Populus trichocarpa]
Pop_A06G085778	CSLA3	AT1G23480	Leaf	Epidermis	10.1093/plcell/koaa060	hypothetical protein MIMGU_mgv1a023425mg [Erythranthe guttata]
Pop_A01G010263	ZFP7	AT1G24625	Leaf	Epidermis	10.1093/plcell/koaa060	hypothetical protein POPTR_001G298700 [Populus trichocarpa]
Pop_A15G084288	---	AT1G25275	Leaf	Epidermis	10.1093/plcell/koaa060	0
Pop_A10G069350	CLE43	AT1G25425	Leaf	Epidermis	10.1093/plcell/koaa060	hypothetical protein POPTR_010G124900 [Populus trichocarpa]
Pop_A03G076466	EXPA10	AT1G26770	Leaf	Epidermis	10.1093/plcell/koaa060	expansin-A10 [Jatropha curcas]
Pop_A08G012035	---	AT1G26850	Leaf	Epidermis	10.1093/plcell/koaa060	probable methyltransferase PMT2 [Populus trichocarpa]
Pop_A01G079974	LTPG1	AT1G27950	Leaf	Epidermis	10.1093/plcell/koaa060	non-specific lipid transfer protein GPI-anchored 1 [Populus trichocarpa]
Pop_A04G070653	---	AT1G29450	Leaf	Epidermis	10.1093/plcell/koaa060	auxin-responsive protein SAUR68-like [Durio zibethinus]
Pop_A02G005484	---	AT1G29460	Leaf	Epidermis	10.1093/plcell/koaa060	carboxypeptidase SOL1 isoform X3 [Populus trichocarpa]
Pop_A09G076900	---	AT1G29500	Leaf	Epidermis	10.1093/plcell/koaa060	hypothetical protein POPTR_009G141200 [Populus trichocarpa]
Pop_A01G010159	---	AT1G29660	Leaf	Epidermis	10.1093/plcell/koaa060	PREDICTED: GDSL esterase/lipase At1g29670-like [Populus euphratica]
Pop_A03G034672	---	AT1G29670	Leaf	Epidermis	10.1093/plcell/koaa060	PREDICTED: GDSL esterase/lipase At4g18970-like [Populus euphratica]
Pop_A01G059078	---	AT1G29790	Leaf	Epidermis	10.1093/plcell/koaa060	PREDICTED: uncharacterized protein LOC105112010 [Populus euphratica]
Pop_A01G054786	KUF1	AT1G31350	Leaf	Epidermis	10.1093/plcell/koaa060	PREDICTED: F-box/kelch-repeat protein SKIP25-like [Populus euphratica]
Pop_A01G025097	---	AT1G32780	Leaf	Epidermis	10.1093/plcell/koaa060	hypothetical protein POPTR_001G448700 [Populus trichocarpa]
Pop_A01G025060	---	AT1G33050	Leaf	Epidermis	10.1093/plcell/koaa060	uncharacterized protein LOC7490720 isoform X3 [Populus trichocarpa]
Pop_A01G025058	---	AT1G33055	Leaf	Epidermis	10.1093/plcell/koaa060	hypothetical protein POPTR_001G452500 [Populus trichocarpa]
Pop_A02G088587	---	AT1G34640	Leaf	Epidermis	10.1093/plcell/koaa060	signal peptidase complex-like protein DTM1 isoform X1 [Populus trichocarpa]
Pop_A05G001905	---	AT1G35180	Leaf	Epidermis	10.1093/plcell/koaa060	PREDICTED: transmembrane protein 136 [Populus euphratica]
Pop_A02G088543	PAS3	AT1G36160	Leaf	Epidermis	10.1093/plcell/koaa060	acetyl-CoA carboxylase 1 [Populus trichocarpa]
Pop_A09G026571	LRD2	AT1G49430	Leaf	Epidermis	10.1093/plcell/koaa060	PREDICTED: long chain acyl-CoA synthetase 2 isoform X1 [Populus euphratica]
Pop_A18G089866	---	AT1G51805	Leaf	Epidermis	10.1093/plcell/koaa060	hypothetical protein POPTR_018G107900 [Populus trichocarpa]
Pop_A01G032275	PERK15	AT1G52290	Leaf	Epidermis	10.1093/plcell/koaa060	proline-rich receptor-like protein kinase PERK15 isoform X1 [Populus trichocarpa]
Pop_A03G050005	PME1	AT1G53840	Leaf	Epidermis	10.1093/plcell/koaa060	PREDICTED: pectinesterase 3-like [Populus euphratica]
Pop_A05G072068	LOX1	AT1G55020	Leaf	Epidermis	10.1093/plcell/koaa060	probable linoleate 9S-lipoxygenase 5 isoform X2 [Populus trichocarpa]
Pop_A03G014606	---	AT1G55260	Leaf	Epidermis	10.1093/plcell/koaa060	protein YLS3 [Populus trichocarpa]
Pop_A01G029548	---	AT1G55265	Leaf	Epidermis	10.1093/plcell/koaa060	PREDICTED: uncharacterized protein LOC105115490 [Populus euphratica]
Pop_A01G075836	EMB80	AT1G55350	Leaf	Epidermis	10.1242/dev.122325	calpain-type cysteine protease DEK1 isoform X1 [Populus trichocarpa]
Pop_A13G054165	SVB	AT1G56580	Leaf	Epidermis	10.1093/plcell/koaa060	uncharacterized protein LOC7478891 [Populus trichocarpa]
Pop_A02G066053	ZCF37	AT1G59590	Leaf	Epidermis	10.1093/plcell/koaa060	PREDICTED: uncharacterized protein LOC105120555 [Populus euphratica]
Pop_A04G018334	---	AT1G61900	Leaf	Epidermis	10.1093/plcell/koaa060	uncharacterized GPI-anchored protein At1g61900 isoform X1 [Populus trichocarpa]
Pop_G15G084459	---	AT1G62660	Leaf	Epidermis	10.1093/plcell/koaa060	acid beta-fructofuranosidase 1, vacuolar [Populus trichocarpa]
Pop_A01G059987	UER1	AT1G63000	Leaf	Epidermis	10.1093/plcell/koaa060	PREDICTED: bifunctional dTDP-4-dehydrorhamnose 3,5-epimerase/dTDP-4-dehydrorhamnose reductase [Populus euphratica]
Pop_A01G059626	RBL2	AT1G63120	Leaf	Epidermis	10.1093/plcell/koaa060	RHOMBOID-like protein 2 [Populus trichocarpa]
Pop_A02G012218	---	AT1G63220	Leaf	Epidermis	10.1093/plcell/koaa060	C2 domain-containing protein At1g63220 [Populus trichocarpa]
Pop_A01G059690	SPPL2	AT1G63690	Leaf	Epidermis	10.1093/plcell/koaa060	signal peptide peptidase-like 2 isoform X1 [Populus trichocarpa]
Pop_A03G014898	---	AT1G64650	Leaf	Epidermis	10.1093/plcell/koaa060	molybdate-anion transporter [Populus trichocarpa]
Pop_A19G052806	4CL3	AT1G65060	Leaf	Epidermis	10.1093/plcell/koaa060	4-coumarate: coenzyme A ligase 2 [Populus tomentosa]
Pop_A19G052849	---	AT1G65295	Leaf	Epidermis	10.1093/plcell/koaa060	uncharacterized protein LOC7459219 [Populus trichocarpa]
Pop_A17G075163	---	AT1G66180	Leaf	Epidermis	10.1093/plcell/koaa060	PREDICTED: aspartic proteinase PCS1-like [Populus euphratica]
Pop_A04G026343	CML23	AT1G66400	Leaf	Epidermis	10.1093/plcell/koaa060	calcium-binding protein CML24 [Populus trichocarpa]
Pop_A08G045945	YBR159	AT1G67730	Leaf	Epidermis	10.1093/plcell/koaa060	very-long-chain 3-oxoacyl-CoA reductase 1 [Populus trichocarpa]
Pop_A06G061918	MAP70-1	AT1G68060	Leaf	Epidermis	10.1093/plcell/koaa060	microtubule-associated protein 70-1 isoform X1 [Populus trichocarpa]
Pop_A06G053292	---	AT1G68400	Leaf	Epidermis	10.1093/plcell/koaa060	probable leucine-rich repeat receptor-like protein kinase At1g68400 [Populus trichocarpa]
Pop_A08G064027	POP1	AT1G68530	Leaf	Epidermis	10.1093/plcell/koaa060	3-ketoacyl-CoA synthase 6 [Populus trichocarpa]
Pop_A08G064023	XYL1	AT1G68560	Leaf	Epidermis	10.1093/plcell/koaa060	alpha-xylosidase 1 [Populus trichocarpa]
Pop_A08G063957	---	AT1G68780	Leaf	Epidermis	10.1093/plcell/koaa060	hypothetical protein [Populus tomentosa]
Pop_A08G063975	---	AT1G68810	Leaf	Epidermis	10.1371/journal.pone.0107637	basic helix-loop-helix family protein [Populus tomentosa]
Pop_A08G063975	---	AT1G68810	Leaf	Epidermis	10.1371/journal.pone.0107637	basic helix-loop-helix family protein [Populus tomentosa]
Pop_A10G047701	---	AT1G70160	Leaf	Epidermis	10.1093/plcell/koaa060	uncharacterized protein LOC18102371 [Populus trichocarpa]
Pop_A08G002456	MLP43	AT1G70890	Leaf	Epidermis	10.1093/plcell/koaa060	MLP-like protein 43 [Populus trichocarpa]
Pop_A02G005474	---	AT1G71695	Leaf	Epidermis	10.1093/plcell/koaa060	PREDICTED: peroxidase 12-like [Populus euphratica]
Pop_A13G082745	---	AT1G72180	Leaf	Epidermis	10.1093/plcell/koaa060	hypothetical protein POPTR_013G103200 [Populus trichocarpa]
Pop_A01G054741	HTH	AT1G72970	Leaf	Epidermis	10.1093/plcell/koaa060	protein HOTHEAD [Populus trichocarpa]
Pop_A12G073870	BEE3	AT1G73830	Leaf	Epidermis	10.1093/plcell/koaa060	transcription factor BEE 3 isoform X2 [Populus trichocarpa]
Pop_A02G005163	ZHD5	AT1G75240	Leaf	Epidermis	10.1093/plcell/koaa060	zinc-finger homeodomain protein 5 [Populus trichocarpa]
Pop_A02G005148	WAT1	AT1G75500	Leaf	Epidermis	10.1093/plcell/koaa060	protein WALLS ARE THIN 1 [Populus trichocarpa]
Pop_A02G004929	---	AT1G75710	Leaf	Epidermis	10.1093/plcell/koaa060	uncharacterized protein LOC7490653 [Populus trichocarpa]
Pop_A02G004986	---	AT1G75900	Leaf	Epidermis	10.1093/plcell/koaa060	PREDICTED: GDSL esterase/lipase EXL3-like [Populus euphratica]
Pop_A05G057131	---	AT1G76360	Leaf	Epidermis	10.1093/plcell/koaa060	probable serine/threonine-protein kinase PBL21 isoform X1 [Populus trichocarpa]
Pop_G02G065367	---	AT1G76670	Leaf	Epidermis	10.1093/plcell/koaa060	PREDICTED: UDP-galactose transporter 2 [Populus euphratica]
Pop_A01G057011	STP14	AT1G77210	Leaf	Epidermis	10.1093/plcell/koaa060	sugar transport protein 14 [Populus trichocarpa]
Pop_A02G088582	---	AT1G78170	Leaf	Epidermis	10.1093/plcell/koaa060	uncharacterized protein LOC7495152 [Populus trichocarpa]
Pop_A02G088596	---	AT1G78210	Leaf	Epidermis	10.1093/plcell/koaa060	monoacylglycerol lipase ABHD6 [Populus trichocarpa]
Pop_A01G015598	ROL1	AT1G78570	Leaf	Epidermis	10.1093/plcell/koaa060	trifunctional UDP-glucose 4,6-dehydratase/UDP-4-keto-6-deoxy-D-glucose 3,5-epimerase/UDP-4-keto-L-rhamnose-reductase RHM1 [Populus trichocarpa]
Pop_A01G015556	GGH2	AT1G78680	Leaf	Epidermis	10.1093/plcell/koaa060	gamma-glutamyl hydrolase 2-like [Populus trichocarpa]
Pop_A11G056669	---	AT1G78830	Leaf	Epidermis	10.1093/plcell/koaa060	epidermis-specific secreted glycoprotein EP1 [Populus trichocarpa]
Pop_A11G021517	---	AT1G78850	Leaf	Epidermis	10.1093/plcell/koaa060	epidermis-specific secreted glycoprotein EP1 [Populus trichocarpa]
Pop_A05G073343	---	AT1G79160	Leaf	Epidermis	10.1093/plcell/koaa060	uncharacterized protein LOC7462565 [Populus trichocarpa]
Pop_A01G079995	---	AT1G79660	Leaf	Epidermis	10.1093/plcell/koaa060	PREDICTED: uncharacterized protein LOC105132679 [Populus euphratica]
Pop_A01G003838	ATXRCC1	AT1G80420	Leaf	Epidermis	10.1093/plcell/koaa060	PREDICTED: DNA-repair protein XRCC1-like [Populus euphratica]
Pop_A01G003816	---	AT1G80440	Leaf	Epidermis	10.1093/plcell/koaa060	PREDICTED: F-box/kelch-repeat protein At1g80440 [Populus euphratica]
Pop_A04G026482	---	AT2G01300	Leaf	Epidermis	10.1093/plcell/koaa060	uncharacterized protein LOC7487364 [Populus trichocarpa]
Pop_A04G026398	At17.1	AT2G01340	Leaf	Epidermis	10.1093/plcell/koaa060	uncharacterized protein At1g66480 [Populus trichocarpa]
Pop_A08G086545	MAP65-6	AT2G01910	Leaf	Epidermis	10.1093/plcell/koaa060	PREDICTED: 65-kDa microtubule-associated protein 6-like isoform X1 [Populus euphratica]
Pop_A15G017281	PKS1	AT2G02950	Leaf	Epidermis	10.1093/plcell/koaa060	protein PHYTOCHROME KINASE SUBSTRATE 3 [Populus trichocarpa]
Pop_A13G082726	---	AT2G04080	Leaf	Epidermis	10.1093/plcell/koaa060	hypothetical protein POPTR_013G101500 [Populus trichocarpa]
Pop_A14G045494	---	AT2G04280	Leaf	Epidermis	10.1093/plcell/koaa060	uncharacterized protein LOC7469342 [Populus trichocarpa]
Pop_A05G073277	---	AT2G17550	Leaf	Epidermis	10.1093/plcell/koaa060	uncharacterized protein LOC7480463 [Populus trichocarpa]
Pop_A05G073224	---	AT2G17705	Leaf	Epidermis	10.1093/plcell/koaa060	PREDICTED: uncharacterized protein LOC105124083 [Populus euphratica]
Pop_A05G073029	---	AT2G18630	Leaf	Epidermis	10.1093/plcell/koaa060	UPF0496 protein At2g18630-like [Populus trichocarpa]
Pop_A01G054836	---	AT2G19460	Leaf	Epidermis	10.1093/plcell/koaa060	unknown [Populus trichocarpa]
Pop_A04G070718	---	AT2G21180	Leaf	Epidermis	10.1093/plcell/koaa060	uncharacterized protein LOC7477861 [Populus trichocarpa]
Pop_A05G071892	---	AT2G22170	Leaf	Epidermis	10.1093/plcell/koaa060	PLAT domain-containing protein 1 [Populus trichocarpa]
Pop_A07G022722	---	AT2G22795	Leaf	Epidermis	10.1093/plcell/koaa060	PREDICTED: dentin sialophosphoprotein-like isoform X1 [Populus euphratica]
Pop_A15G048973	CYP96A1	AT2G23180	Leaf	Epidermis	10.1093/plcell/koaa060	PREDICTED: cytochrome P450 86B1-like [Populus euphratica]
Pop_A05G073010	SAW2	AT2G23760	Leaf	Epidermis	10.1105/tpc.106.048769	BEL1-like homeodomain protein 4 [Populus trichocarpa]
Pop_A05G073010	SAW2	AT2G23760	Leaf	Epidermis	10.1105/tpc.106.048769	BEL1-like homeodomain protein 4 [Populus trichocarpa]
Pop_G06G003012	---	AT2G25310	Leaf	Epidermis	10.1093/plcell/koaa060	ER membrane protein complex subunit 7 homolog isoform X2 [Populus trichocarpa]
Pop_A01G032253	---	AT2G25735	Leaf	Epidermis	10.1093/plcell/koaa060	hypothetical protein POPTR_001G180500 [Populus trichocarpa]
Pop_G03G021340	---	AT2G26190	Leaf	Epidermis	10.1093/plcell/koaa060	IQ domain-containing protein IQM4 [Populus trichocarpa]
Pop_A06G053403	KCS10	AT2G26250	Leaf	Epidermis	10.1093/plcell/koaa060	PREDICTED: 3-ketoacyl-CoA synthase 10 [Populus euphratica]
Pop_A01G079748	CYP734A1	AT2G26710	Leaf	Epidermis	10.1093/plcell/koaa060	cytochrome P450 714C3 [Populus trichocarpa]
Pop_G18G000077	PEC1	AT2G26910	Leaf	Epidermis	10.1093/plcell/koaa060	ABC transporter G family member 32 [Populus trichocarpa]
Pop_A06G089516	---	AT2G26975	Leaf	Epidermis	10.1093/plcell/koaa060	copper transporter 2 [Populus trichocarpa]
Pop_A05G001926	PAP12	AT2G27190	Leaf	Epidermis	10.1093/plcell/koaa060	purple acid phosphatase 2 isoform X1 [Populus trichocarpa]
Pop_A04G060262	---	AT2G27770	Leaf	Epidermis	10.1093/plcell/koaa060	uncharacterized protein LOC18097982 [Populus trichocarpa]
Pop_A09G083636	BGAL8	AT2G28470	Leaf	Epidermis	10.1093/plcell/koaa060	beta-galactosidase 8 [Populus trichocarpa]
Pop_A18G034210	REF3	AT2G30490	Leaf	Epidermis	10.1093/plcell/koaa060	cytochrome P450 CYP73A100-like [Populus trichocarpa]
Pop_A19G055073	---	AT2G30500	Leaf	Epidermis	10.1093/plcell/koaa060	protein NETWORKED 4B isoform X1 [Populus trichocarpa]
Pop_A08G046220	CVL1	AT2G32010	Leaf	Epidermis	10.1093/plcell/koaa060	type IV inositol polyphosphate 5-phosphatase 7 isoform X1 [Populus trichocarpa]
Pop_A02G023871	MYB101	AT2G32460	Leaf	Epidermis	10.1371/journal.pone.0107637	transcription factor MYB101 [Populus trichocarpa]
Pop_A02G023871	MYB101	AT2G32460	Leaf	Epidermis	10.1371/journal.pone.0107637	transcription factor MYB101 [Populus trichocarpa]
Pop_A01G010385	AP4.3A	AT2G32800	Leaf	Epidermis	10.1093/plcell/koaa060	PREDICTED: receptor like protein kinase S.2-like [Populus euphratica]
Pop_A06G062158	---	AT2G35760	Leaf	Epidermis	10.1093/plcell/koaa060	CASP-like protein 2B2 [Populus trichocarpa]
Pop_A07G006364	---	AT2G36320	Leaf	Epidermis	10.1093/plcell/koaa060	zinc finger A20 and AN1 domain-containing stress-associated protein 9 [Populus trichocarpa]
Pop_A06G089583	---	AT2G36410	Leaf	Epidermis	10.1093/plcell/koaa060	ankyrin repeat domain-containing protein 30A isoform X1 [Populus trichocarpa];ankyrin repeat domain-containing protein 30A isoform X2 [Populus trichocarpa]
Pop_A06G085807	PAL1	AT2G37040	Leaf	Epidermis	10.1093/plcell/koaa060	phenylalanine ammonia-lyase 1 [Populus tomentosa]
Pop_A06G061434	EXP3	AT2G37640	Leaf	Epidermis	10.1093/plcell/koaa060	expansin-A6 [Populus trichocarpa]
Pop_A06G089509	ERH1	AT2G37940	Leaf	Epidermis	10.1093/plcell/koaa060	phosphatidylinositol:ceramide inositolphosphotransferase 1 [Populus trichocarpa]
Pop_A06G089450	WAV5	AT2G38120	Leaf	Epidermis	10.1093/plcell/koaa060	auxin transporter-like protein 2 [Populus trichocarpa]
Pop_A16G089933	---	AT2G38500	Leaf	Epidermis	10.1093/plcell/koaa060	uncharacterized protein LOC7488777 [Populus trichocarpa]
Pop_A04G029312	LTP1	AT2G38540	Leaf	Epidermis	10.1093/plcell/koaa060	unknown [Populus trichocarpa x Populus deltoides]
Pop_A01G079821	ANNAT4	AT2G38750	Leaf	Epidermis	10.1093/plcell/koaa060	annexin D4 [Populus trichocarpa]
Pop_A01G079820	ANNAT3	AT2G38760	Leaf	Epidermis	10.1093/plcell/koaa060	annexin D3 [Populus trichocarpa]
Pop_A08G063425	---	AT2G39980	Leaf	Epidermis	10.1093/plcell/koaa060	uncharacterized acetyltransferase At3g50280 [Populus trichocarpa]
Pop_A06G089343	ASG8	AT2G40475	Leaf	Epidermis	10.1093/plcell/koaa060	PREDICTED: uncharacterized protein LOC105110296 [Populus euphratica]
Pop_A06G089334	EXPA8	AT2G40610	Leaf	Epidermis	10.1093/plcell/koaa060	expansin-A8 [Populus trichocarpa]
Pop_A18G018701	---	AT2G41475	Leaf	Epidermis	10.1093/plcell/koaa060	embryo-specific protein ATS3A [Populus trichocarpa]
Pop_A01G079727	GPDHC1	AT2G41540	Leaf	Epidermis	10.1093/plcell/koaa060	PREDICTED: probable glycerol-3-phosphate dehydrogenase [NAD(+)] 1, cytosolic [Populus euphratica]
Pop_A02G005515	PDF1	AT2G42840	Shoot apical	Epidermis	10.1093/oxfordjournals.pcp.a029579	protodermal factor 1 [Populus trichocarpa]
Pop_A02G005526	MPK20	AT2G42880	Leaf	Epidermis	10.1093/plcell/koaa060	PREDICTED: mitogen-activated protein kinase 20-like isoform X1 [Populus euphratica]
Pop_A06G061660	MSS3	AT2G43290	Leaf	Epidermis	10.1093/plcell/koaa060	PREDICTED: calmodulin-like protein 3 isoform X3 [Populus euphratica]
Pop_A14G044766	LCR	AT2G45970	Leaf	Epidermis	10.1093/plcell/koaa060	cytochrome P450 86A8 [Populus trichocarpa]
Pop_A02G012579	LACS1	AT2G47240	Leaf	Epidermis	10.1093/plcell/koaa060	long chain acyl-CoA synthetase 1 [Populus trichocarpa]
Pop_A02G012656	---	AT2G47485	Leaf	Epidermis	10.1093/plcell/koaa060	uncharacterized protein LOC7460432 [Populus trichocarpa]
Pop_A01G032103	---	AT3G01860	Leaf	Epidermis	10.1093/plcell/koaa060	uncharacterized protein At3g27210 isoform X2 [Populus trichocarpa];hypothetical protein POPTR_001G332500 [Populus trichocarpa]
Pop_A04G036013	scpl25	AT3G02110	Leaf	Epidermis	10.1093/plcell/koaa060	serine carboxypeptidase-like 25 isoform X1 [Populus trichocarpa]
Pop_A04G026405	GAUT9	AT3G02350	Leaf	Epidermis	10.1093/plcell/koaa060	probable galacturonosyltransferase 9 [Populus trichocarpa]
Pop_A08G063557	---	AT3G02630	Leaf	Epidermis	10.1093/plcell/koaa060	stearoyl-[acyl-carrier-protein] 9-desaturase, chloroplastic isoform X1 [Populus trichocarpa]
Pop_A05G071833	ZIK4	AT3G04910	Leaf	Epidermis	10.1093/plcell/koaa060	PREDICTED: probable serine/threonine-protein kinase WNK9 [Populus euphratica]
Pop_A02G026893	PNC1	AT3G05290	Leaf	Epidermis	10.1093/plcell/koaa060	0
Pop_A08G063857	ACLB-1	AT3G06650	Leaf	Epidermis	10.1093/plcell/koaa060	subunit B of the trimeric enzyme ATP Citrate lyase family protein [Populus tomentosa]
Pop_A02G024020	NSN1	AT3G07050	Leaf	Epidermis	10.1007/s11103-011-9840-7	guanine nucleotide-binding protein-like NSN1 [Populus trichocarpa]
Pop_A01G056997	PLC2	AT3G08510	Leaf	Epidermis	10.1093/plcell/koaa060	phospholipase C [Populus tomentosa]
Pop_A02G005399	---	AT3G10260	Leaf	Epidermis	10.1093/plcell/koaa060	reticulon-like protein B8 [Populus trichocarpa]
Pop_A08G007027	---	AT3G10720	Leaf	Epidermis	10.1093/plcell/koaa060	probable pectinesterase/pectinesterase inhibitor 25 [Populus trichocarpa]
Pop_A06G062038	ATASD1	AT3G10740	Leaf	Epidermis	10.1093/plcell/koaa060	alpha-L-arabinofuranosidase 1 isoform X1 [Populus trichocarpa]
Pop_A01G054753	---	AT3G13690	Leaf	Epidermis	10.1093/plcell/koaa060	LOW QUALITY PROTEIN: inactive protein kinase SELMODRAFT_444075 [Populus trichocarpa]
Pop_A01G054748	BGAL1	AT3G13750	Leaf	Epidermis	10.1093/plcell/koaa060	beta-galactosidase 1 isoform X1 [Populus trichocarpa]
Pop_A06G063209	PLDALPHA1	AT3G15730	Leaf	Epidermis	10.1093/plcell/koaa060	phospholipase D alpha 1 [Populus trichocarpa]
Pop_A01G032295	AAE13	AT3G16170	Leaf	Epidermis	10.1093/plcell/koaa060	malonate--CoA ligase isoform X2 [Populus trichocarpa]
Pop_A01G027328	---	AT3G16370	Leaf	Epidermis	10.1093/plcell/koaa060	GDSL esterase/lipase APG [Populus trichocarpa]
Pop_A08G009184	RAP2.3	AT3G16770	Leaf	Epidermis	10.1093/plcell/koaa060	ethylene-responsive transcription factor RAP2-3 [Populus trichocarpa]
Pop_A08G009175	---	AT3G16850	Leaf	Epidermis	10.1093/plcell/koaa060	probable polygalacturonase [Populus trichocarpa]
Pop_A08G063837	---	AT3G17100	Leaf	Epidermis	10.1093/plcell/koaa060	PREDICTED: transcription factor bHLH148-like [Populus euphratica]
Pop_A10G001200	SnRK3.16	AT3G17510	Leaf	Epidermis	10.1093/plcell/koaa060	CBL-interacting protein kinase 1 [Populus trichocarpa]
Pop_A12G073873	SYTF	AT3G18370	Leaf	Epidermis	10.1093/plcell/koaa060	PREDICTED: extended synaptotagmin-3-like [Populus euphratica]
Pop_A01G010288	---	AT3G19553	Leaf	Epidermis	10.1093/plcell/koaa060	probable polyamine transporter At3g19553 [Populus trichocarpa]
Pop_A01G010333	---	AT3G19660	Leaf	Epidermis	10.1093/plcell/koaa060	uncharacterized protein LOC7478672 [Populus trichocarpa]
Pop_A04G059362	EIN3	AT3G20770	Leaf	Epidermis	10.1093/plcell/koaa060	protein ETHYLENE INSENSITIVE 3 [Populus trichocarpa]
Pop_A01G004243	HGL1	AT3G23640	Leaf	Epidermis	10.1093/plcell/koaa060	PREDICTED: neutral alpha-glucosidase C-like isoform X1 [Populus euphratica];uncharacterized protein LOC18094054 isoform X1 [Populus trichocarpa]
Pop_A01G010161	RALFL24	AT3G23805	Leaf	Epidermis	10.1093/plcell/koaa060	PREDICTED: protein RALF-like 24 [Populus euphratica]
Pop_A06G079457	---	AT3G24420	Leaf	Epidermis	10.1093/plcell/koaa060	strigolactone esterase D14 [Populus trichocarpa]
Pop_A05G071878	DRB3	AT3G26932	Leaf	Epidermis	10.1093/plcell/koaa060	double-stranded RNA-binding protein 2 [Populus trichocarpa]
Pop_A17G020617	EXPA5	AT3G29030	Leaf	Epidermis	10.1093/plcell/koaa060	expansin S1 precursor family protein-like 2 [Populus tomentosa]
Pop_A04G059379	---	AT3G43720	Leaf	Epidermis	10.1093/plcell/koaa060	non-specific lipid transfer protein GPI-anchored 2 [Populus trichocarpa]
Pop_A09G077127	CAF1a	AT3G44260	Leaf	Epidermis	10.1093/plcell/koaa060	probable CCR4-associated factor 1 homolog 9 [Populus trichocarpa]
Pop_A01G056844	---	AT3G46450	Leaf	Epidermis	10.1093/plcell/koaa060	PREDICTED: uncharacterized protein LOC105107892 [Populus euphratica]
Pop_A01G056851	---	AT3G46540	Leaf	Epidermis	10.1093/plcell/koaa060	PREDICTED: uncharacterized protein LOC105133167 [Populus euphratica]
Pop_A17G020590	MYB94	AT3G47600	Leaf	Epidermis	10.1093/plcell/koaa060	myb-related protein 306 [Populus trichocarpa]
Pop_A01G005935	---	AT3G49720	Leaf	Epidermis	10.1093/plcell/koaa060	uncharacterized protein At3g49720 [Populus trichocarpa]
Pop_A04G030635	CRK	AT3G50530	Leaf	Epidermis	10.1093/plcell/koaa060	PREDICTED: CDPK-related kinase 5-like [Populus euphratica]
Pop_A05G072964	---	AT3G50560	Leaf	Epidermis	10.1093/plcell/koaa060	very-long-chain 3-oxoacyl-CoA reductase [Populus trichocarpa]
Pop_A05G073058	SNP2	AT3G50660	Leaf	Epidermis	10.1111/j.1365-313X.2007.03304.x	cytochrome P450 90B1 isoform X1 [Populus trichocarpa]
Pop_A05G073064	---	AT3G50845	Leaf	Epidermis	10.1093/plcell/koaa060	hypothetical protein POPTR_005G123100 [Populus trichocarpa]
Pop_A05G073152	TT6	AT3G51240	Leaf	Epidermis	10.1093/plcell/koaa060	unknown [Populus trichocarpa]
Pop_A08G006832	---	AT3G52060	Leaf	Epidermis	10.1093/plcell/koaa060	PREDICTED: uncharacterized protein LOC105131558 [Populus euphratica]
Pop_A06G053579	PUB22	AT3G52450	Leaf	Epidermis	10.1093/plcell/koaa060	PREDICTED: E3 ubiquitin-protein ligase PUB22-like [Populus euphratica]
Pop_A06G053558	---	AT3G52480	Leaf	Epidermis	10.1093/plcell/koaa060	uncharacterized protein LOC7466001 [Populus trichocarpa]
Pop_A06G053555	---	AT3G52500	Leaf	Epidermis	10.1093/plcell/koaa060	probable aspartyl protease At4g16563 [Populus trichocarpa]
Pop_A04G059314	---	AT3G52740	Leaf	Epidermis	10.1093/plcell/koaa060	hypothetical protein POPTR_004G203000 [Populus trichocarpa]
Pop_A06G053450	---	AT3G53540	Leaf	Epidermis	10.1093/plcell/koaa060	uncharacterized protein LOC7492258 isoform X1 [Populus trichocarpa]
Pop_A01G056955	PTR1	AT3G54140	Leaf	Epidermis	10.1093/plcell/koaa060	protein NRT1/ PTR FAMILY 8.1 [Populus trichocarpa]
Pop_A16G090008	---	AT3G54200	Leaf	Epidermis	10.1093/plcell/koaa060	PREDICTED: uncharacterized protein LOC105112288 [Populus euphratica]
Pop_A02G065224	SETH3	AT3G54690	Leaf	Epidermis	10.1093/plcell/koaa060	probable arabinose 5-phosphate isomerase [Populus trichocarpa]
Pop_A10G047182	TT5	AT3G55120	Leaf	Epidermis	10.1093/plcell/koaa060	hypothetical protein DVH24_023178 [Malus domestica]
Pop_A06G053444	---	AT3G55140	Leaf	Epidermis	10.1093/plcell/koaa060	unknown [Populus trichocarpa]
Pop_A08G064118	TSC13	AT3G55360	Leaf	Epidermis	10.1093/plcell/koaa060	very-long-chain enoyl-CoA reductase [Populus trichocarpa]
Pop_A08G058006	---	AT3G56130	Leaf	Epidermis	10.1093/plcell/koaa060	uncharacterized protein LOC7472449 [Populus trichocarpa]
Pop_A08G058019	ASNAP	AT3G56190	Leaf	Epidermis	10.1093/plcell/koaa060	alpha-soluble NSF attachment protein 2 [Populus trichocarpa]
Pop_A06G062253	---	AT3G57400	Leaf	Epidermis	10.1093/plcell/koaa060	PREDICTED: uncharacterized protein LOC105142232 [Populus euphratica]
Pop_A06G061846	CPK32	AT3G57530	Leaf	Epidermis	10.1093/plcell/koaa060	calcium-dependent protein kinase 32 isoform X1 [Populus trichocarpa]
Pop_A14G044826	---	AT3G61550	Leaf	Epidermis	10.1093/plcell/koaa060	RING-H2 finger protein ATL67 [Manihot esculenta]
Pop_A05G017007	---	AT3G62630	Leaf	Epidermis	10.1093/plcell/koaa060	PREDICTED: uncharacterized protein LOC105134286 [Populus euphratica]
Pop_A02G012093	UNE10	AT4G00050	Leaf	Epidermis	10.1093/plcell/koaa060	transcription factor UNE10 [Populus trichocarpa]
Pop_A10G046646	---	AT4G00300	Leaf	Epidermis	10.1093/plcell/koaa060	PREDICTED: probable receptor-like protein kinase At5g24010 [Populus euphratica]
Pop_A14G044764	GPAT8	AT4G00400	Leaf	Epidermis	10.1093/plcell/koaa060	probable glycerol-3-phosphate acyltransferase 8 [Populus trichocarpa]
Pop_A02G012582	GPAT3	AT4G01950	Leaf	Epidermis	10.1093/plcell/koaa060	probable glycerol-3-phosphate acyltransferase 3 [Populus trichocarpa]
Pop_A10G069490	---	AT4G02860	Leaf	Epidermis	10.1093/plcell/koaa060	uncharacterized protein LOC112328881 [Populus trichocarpa]
Pop_A13G032455	TPC1	AT4G03560	Leaf	Epidermis	10.1093/plcell/koaa060	two pore calcium channel protein 1 isoform X1 [Populus trichocarpa]
Pop_A04G018353	---	AT4G04630	Leaf	Epidermis	10.1093/plcell/koaa060	uncharacterized protein LOC7479049 [Populus trichocarpa]
Pop_A04G018290	PDF2	AT4G04890	Leaf	Epidermis	10.1093/plcell/koaa060	homeobox-leucine zipper protein MERISTEM L1 [Populus trichocarpa]
Pop_A04G026287	MYB6	AT4G09460	Leaf	Epidermis	10.1093/plcell/koaa060	R2R3 MYB flavonoid repressor protein [Populus tremula x Populus tremuloides]
Pop_A02G005489	---	AT4G09760	Leaf	Epidermis	10.1093/plcell/koaa060	probable choline kinase 3 isoform X1 [Populus trichocarpa]
Pop_A01G059863	---	AT4G10840	Leaf	Epidermis	10.1093/plcell/koaa060	PREDICTED: nephrocystin-3-like [Populus euphratica]
Pop_A02G023981	---	AT4G12650	Leaf	Epidermis	10.1093/plcell/koaa060	transmembrane 9 superfamily member 12 [Populus trichocarpa]
Pop_A01G010314	---	AT4G13840	Leaf	Epidermis	10.1093/plcell/koaa060	protein ECERIFERUM 26 [Populus trichocarpa]
Pop_A08G046113	HCD1	AT4G14440	Leaf	Epidermis	10.1093/plcell/koaa060	PREDICTED: uncharacterized protein LOC105129466 [Populus euphratica]
Pop_A02G065297	SLR	AT4G14550	Leaf	Epidermis	10.1093/plcell/koaa060	auxin-induced protein AUX28 [Populus trichocarpa]
Pop_A18G012809	---	AT4G14740	Leaf	Epidermis	10.1093/plcell/koaa060	PREDICTED: uncharacterized protein LOC105127167 isoform X1 [Populus euphratica]
Pop_A05G071806	---	AT4G14746	Leaf	Epidermis	10.1093/plcell/koaa060	hypothetical protein POPTR_005G051900 [Populus trichocarpa]
Pop_A05G071811	IQD19	AT4G14750	Leaf	Epidermis	10.1093/plcell/koaa060	PREDICTED: protein IQ-DOMAIN 14-like [Populus euphratica]
Pop_A08G046008	---	AT4G15630	Leaf	Epidermis	10.1093/plcell/koaa060	RecName: Full=CASP-like protein 1E1; Short=PtCASPL1E1
Pop_A18G013206	ISA1	AT4G16130	Leaf	Epidermis	10.1093/plcell/koaa060	L-arabinokinase [Populus trichocarpa]
Pop_A03G050150	---	AT4G17100	Leaf	Epidermis	10.1093/plcell/koaa060	PREDICTED: poly(U)-specific endoribonuclease-B [Populus euphratica]
Pop_A01G004136	TPS5	AT4G17770	Leaf	Epidermis	10.1093/plcell/koaa060	PREDICTED: alpha,alpha-trehalose-phosphate synthase [UDP-forming] 5 [Populus euphratica]
Pop_A01G004063	---	AT4G18030	Leaf	Epidermis	10.1093/plcell/koaa060	putative S-adenosyl-L-methionine-dependent methyltransferase protein [Corchorus olitorius]
Pop_A01G004047	PUP10	AT4G18210	Leaf	Epidermis	10.1093/plcell/koaa060	probable purine permease 11 isoform X1 [Populus trichocarpa]
Pop_A04G029284	NLM2	AT4G18910	Leaf	Epidermis	10.1093/plcell/koaa060	aquaporin NIP1-2 isoform X2 [Populus trichocarpa]
Pop_A01G074737	PCAP1	AT4G20260	Leaf	Epidermis	10.1093/plcell/koaa060	plasma membrane-associated cation-binding protein 1 [Populus trichocarpa]
Pop_A01G015500	ZAC	AT4G21160	Leaf	Epidermis	10.1093/plcell/koaa060	ADP-ribosylation factor GTPase-activating protein AGD12 [Populus trichocarpa]
Pop_A11G056469	---	AT4G21620	Leaf	Epidermis	10.1093/plcell/koaa060	glycine-rich protein 5 [Populus trichocarpa]
Pop_A01G004557	---	AT4G22560	Leaf	Epidermis	10.1093/plcell/koaa060	uncharacterized protein LOC18093969 [Populus trichocarpa]
Pop_A01G059699	---	AT4G22730	Leaf	Epidermis	10.1093/plcell/koaa060	probable LRR receptor-like serine/threonine-protein kinase At1g34110 [Populus trichocarpa]
Pop_A03G014968	---	AT4G23820	Leaf	Epidermis	10.1093/plcell/koaa060	probable polygalacturonase [Populus trichocarpa]
Pop_A03G014935	CSLG3	AT4G23990	Leaf	Epidermis	10.1093/plcell/koaa060	cellulose synthase-like protein G2 [Populus tomentosa]
Pop_A02G066078	ACBP3	AT4G24230	Leaf	Epidermis	10.1093/plcell/koaa060	acyl-CoA-binding domain-containing protein 3 [Populus trichocarpa]
Pop_A05G073123	ATR1	AT4G24520	Leaf	Epidermis	10.1093/plcell/koaa060	NADPH--cytochrome P450 reductase-like isoform X1 [Populus trichocarpa]
Pop_A05G055901	DIC2	AT4G24570	Leaf	Epidermis	10.1093/plcell/koaa060	mitochondrial uncoupling protein 5 [Populus trichocarpa]
Pop_A18G018797	---	AT4G25830	Leaf	Epidermis	10.1093/plcell/koaa060	PREDICTED: CASP-like protein 2C1 [Populus euphratica]
Pop_A01G004134	PGP2	AT4G25960	Leaf	Epidermis	10.1093/plcell/koaa060	ABC transporter B family member 2 [Populus trichocarpa]
Pop_A01G004265	---	AT4G27870	Leaf	Epidermis	10.1093/plcell/koaa060	membrane protein of ER body 1 [Populus trichocarpa]
Pop_A06G061480	---	AT4G28400	Leaf	Epidermis	10.1093/plcell/koaa060	probable protein phosphatase 2C 44 isoform X1 [Populus trichocarpa]
Pop_A02G032945	---	AT4G28780	Leaf	Epidermis	10.1093/plcell/koaa060	GDSL esterase/lipase At4g28780 [Populus trichocarpa]
Pop_A06G064778	ATR2	AT4G30210	Leaf	Epidermis	10.1093/plcell/koaa060	NADPH--cytochrome P450 reductase 2 [Populus trichocarpa]
Pop_A06G064725	DGK7	AT4G30340	Leaf	Epidermis	10.1093/plcell/koaa060	diacylglycerol kinase 7 isoform X1 [Populus trichocarpa]
Pop_A06G064902	---	AT4G30400	Leaf	Epidermis	10.1093/plcell/koaa060	RING-H2 finger protein ATL13 [Populus trichocarpa]
Pop_A06G062860	CSLC5	AT4G31590	Leaf	Epidermis	10.1093/plcell/koaa060	probable xyloglucan glycosyltransferase 5 [Populus trichocarpa]
Pop_A04G018348	SD2-5	AT4G32300	Leaf	Epidermis	10.1093/plcell/koaa060	PREDICTED: G-type lectin S-receptor-like serine/threonine-protein kinase SD2-5 [Populus euphratica]
Pop_A06G063228	RSW1	AT4G32410	Leaf	Epidermis	10.1093/plcell/koaa060	cellulose synthase A catalytic subunit 1 [UDP-forming] isoform X1 [Populus trichocarpa]
Pop_A06G085737	PME44	AT4G33220	Leaf	Epidermis	10.1093/plcell/koaa060	PREDICTED: pectinesterase/pectinesterase inhibitor PPE8B [Populus euphratica]
Pop_A02G012193	---	AT4G33565	Leaf	Epidermis	10.1093/plcell/koaa060	RING-H2 finger protein ATL39 [Populus trichocarpa]
Pop_A01G010225	CYCD3;1	AT4G34160	Leaf	Epidermis	10.1023/A:1006267013170	hypothetical protein [Populus tomentosa]
Pop_A01G032069	ALDH3F1	AT4G36250	Leaf	Epidermis	10.1093/plcell/koaa060	aldehyde dehydrogenase family 3 member F1 [Populus trichocarpa]
Pop_A07G022622	ROT3	AT4G36380	Leaf	Epidermis	10.1093/plcell/koaa060	3-epi-6-deoxocathasterone 23-monooxygenase [Populus trichocarpa]
Pop_A07G022577	---	AT4G36500	Leaf	Epidermis	10.1093/plcell/koaa060	hypothetical protein POPTR_007G022300 [Populus trichocarpa]
Pop_A05G073434	ATAGP18	AT4G37450	Leaf	Epidermis	10.1093/plcell/koaa060	PREDICTED: lysine-rich arabinogalactan protein 18-like [Populus euphratica]
Pop_A07G011977	---	AT4G37470	Leaf	Epidermis	10.1093/plcell/koaa060	probable esterase KAI2 [Populus trichocarpa]
Pop_A01G067285	ELI3-1	AT4G37980	Leaf	Epidermis	10.1093/plcell/koaa060	cinnamyl alcohol dehydrogenase 8 [Populus tomentosa]
Pop_A04G070755	---	AT4G38690	Leaf	Epidermis	10.1093/plcell/koaa060	phosphoinositide-specific phospholipase C [Populus tomentosa]
Pop_A09G077020	ROC1	AT4G38740	Leaf	Epidermis	10.1046/j.1365-313x.2002.01234.x	peptidyl-prolyl cis-trans isomerase 1 [Populus trichocarpa]
Pop_A04G070726	PRP4	AT4G38770	Leaf	Epidermis	10.1093/plcell/koaa060	PREDICTED: proline-rich protein 4 [Populus euphratica]
Pop_A01G010181	CAD9	AT4G39330	Leaf	Epidermis	10.1093/plcell/koaa060	sinapyl alcohol dehydrogenase [Populus tomentosa]
Pop_A01G032127	GGT1	AT4G39640	Leaf	Epidermis	10.1093/plcell/koaa060	glutathione hydrolase 1 [Populus trichocarpa]
Pop_A03G050375	---	AT4G39730	Leaf	Epidermis	10.1093/plcell/koaa060	PLAT domain-containing protein 3 [Populus trichocarpa]
Pop_A05G071958	---	AT4G39840	Leaf	Epidermis	10.1093/plcell/koaa060	uncharacterized protein LOC7477090 [Populus trichocarpa]
Pop_A09G077452	---	AT5G01075	Leaf	Epidermis	10.1093/plcell/koaa060	PREDICTED: uncharacterized protein LOC105108958 [Populus euphratica]
Pop_A06G061473	HTA12	AT5G02560	Leaf	Epidermis	10.1093/plcell/koaa060	histone H2A [Populus trichocarpa]
Pop_A06G085687	---	AT5G03120	Leaf	Epidermis	10.1093/plcell/koaa060	uncharacterized protein LOC18100220 [Populus trichocarpa]
Pop_A06G085781	---	AT5G03380	Leaf	Epidermis	10.1093/plcell/koaa060	PREDICTED: uncharacterized protein LOC105121704 isoform X2 [Populus euphratica]
Pop_A06G085813	RABC2A	AT5G03530	Leaf	Epidermis	10.1093/plcell/koaa060	PREDICTED: ras-related protein RABC2a [Populus euphratica]
Pop_A01G054552	---	AT5G04760	Leaf	Epidermis	10.1093/plcell/koaa060	transcription factor SRM1 [Populus trichocarpa]
Pop_A19G052939	---	AT5G05270	Leaf	Epidermis	10.1093/plcell/koaa060	PREDICTED: probable chalcone--flavonone isomerase 3 [Populus euphratica]
Pop_A06G053541	---	AT5G06270	Leaf	Epidermis	10.1093/plcell/koaa060	hypothetical protein POPTR_006G206000 [Populus trichocarpa]
Pop_A06G053541	---	AT5G06270	Shoot apical	Epidermis	10.1007/s00018-018-2980-z	hypothetical protein POPTR_006G206000 [Populus trichocarpa]
Pop_A06G053597	---	AT5G06440	Leaf	Epidermis	10.1093/plcell/koaa060	PREDICTED: uncharacterized protein LOC105141055 [Populus euphratica]
Pop_A01G058830	BAG3	AT5G07220	Leaf	Epidermis	10.1093/plcell/koaa060	BAG family molecular chaperone regulator 3 [Populus trichocarpa]
Pop_A03G013642	---	AT5G07580	Leaf	Epidermis	10.1093/plcell/koaa060	PREDICTED: ethylene-responsive transcription factor ERF106-like [Populus euphratica]
Pop_A07G006293	scpl35	AT5G08260	Leaf	Epidermis	10.1093/plcell/koaa060	serine carboxypeptidase-like 35 [Populus trichocarpa]
Pop_A02G088711	FLS1	AT5G08640	Leaf	Epidermis	10.1093/plcell/koaa060	flavonol synthase/flavanone 3-hydroxylase [Populus trichocarpa]
Pop_A05G071726	---	AT5G10150	Leaf	Epidermis	10.1093/plcell/koaa060	protein UPSTREAM OF FLC [Populus trichocarpa]
Pop_A05G071975	DOT3	AT5G10250	Leaf	Epidermis	10.1093/plcell/koaa060	BTB/POZ domain-containing protein DOT3 isoform X1 [Populus trichocarpa]
Pop_A07G022698	PEP	AT5G10480	Leaf	Epidermis	10.1093/plcell/koaa060	very-long-chain (3R)-3-hydroxyacyl-CoA dehydratase PASTICCINO 2 [Populus trichocarpa]
Pop_A06G063248	---	AT5G11420	Leaf	Epidermis	10.1093/plcell/koaa060	uncharacterized protein LOC7471574 [Populus trichocarpa];PREDICTED: uncharacterized protein LOC105122387 [Populus euphratica]
Pop_A01G029560	---	AT5G12950	Leaf	Epidermis	10.1093/plcell/koaa060	uncharacterized protein LOC7496037 [Populus trichocarpa]
Pop_A01G074879	---	AT5G13400	Leaf	Epidermis	10.1093/plcell/koaa060	protein NRT1/ PTR FAMILY 6.1 isoform X1 [Populus trichocarpa]
Pop_A01G079859	TT4	AT5G13930	Leaf	Epidermis	10.1093/plcell/koaa060	PREDICTED: chalcone synthase-like [Populus euphratica]
Pop_A01G058703	---	AT5G14360	Leaf	Epidermis	10.1093/plcell/koaa060	PREDICTED: BAG family molecular chaperone regulator 2-like [Populus euphratica]
Pop_A01G058709	---	AT5G14390	Leaf	Epidermis	10.1093/plcell/koaa060	PREDICTED: alpha/beta hydrolase domain-containing protein 17B [Populus euphratica]
Pop_A01G002209	---	AT5G14410	Leaf	Epidermis	10.1093/plcell/koaa060	uncharacterized protein LOC7467654 [Populus trichocarpa]
Pop_A17G020627	MYB16	AT5G15310	Leaf	Epidermis	10.1093/plcell/koaa060	hypothetical protein POPTR_017G086300 [Populus trichocarpa]
Pop_A08G002370	---	AT5G19290	Leaf	Epidermis	10.1093/plcell/koaa060	caffeoyl shikimate esterase 11 [Populus tomentosa]
Pop_A18G083090	---	AT5G20050	Leaf	Epidermis	10.1093/plcell/koaa060	probable receptor-like protein kinase At5g20050 [Populus trichocarpa]
Pop_A01G004296	---	AT5G20110	Leaf	Epidermis	10.1093/plcell/koaa060	0
Pop_A06G061675	HHP1	AT5G20270	Leaf	Epidermis	10.1093/plcell/koaa060	PREDICTED: probable glycosyltransferase At5g20260 [Populus euphratica]
Pop_A06G079361	AGG3	AT5G20635	Leaf	Epidermis	10.1093/plcell/koaa060	guanine nucleotide-binding protein subunit gamma 3 isoform X1 [Populus trichocarpa]
Pop_A05G011537	---	AT5G23280	Leaf	Epidermis	10.1093/plcell/koaa060	PREDICTED: transcription factor TCP7-like [Populus euphratica]
Pop_A01G059644	---	AT5G23750	Leaf	Epidermis	10.1093/plcell/koaa060	LIM domain-containing protein WLIM2b isoform X1 [Populus trichocarpa]
Pop_A01G080072	ESE3	AT5G25190	Leaf	Epidermis	10.1093/plcell/koaa060	ethylene-responsive transcription factor ERF003 [Populus trichocarpa]
Pop_A01G004460	---	AT5G25460	Leaf	Epidermis	10.1093/plcell/koaa060	uncharacterized protein LOC7478790 [Populus trichocarpa]
Pop_A04G030644	RD22	AT5G25610	Leaf	Epidermis	10.1093/plcell/koaa060	hypothetical protein POPTR_004G136700 [Populus trichocarpa]
Pop_A03G050391	PAP26	AT5G34850	Leaf	Epidermis	10.1093/plcell/koaa060	PREDICTED: bifunctional purple acid phosphatase 26 [Populus euphratica]
Pop_A04G026523	---	AT5G38220	Leaf	Epidermis	10.1093/plcell/koaa060	PREDICTED: alpha/beta hydrolase domain-containing protein 17B-like [Populus euphratica]
Pop_A01G081121	---	AT5G39080	Leaf	Epidermis	10.1093/plcell/koaa060	phenolic glucoside malonyltransferase 1 [Populus trichocarpa]
Pop_A01G059021	CRK42	AT5G40380	Leaf	Epidermis	10.1093/plcell/koaa060	cysteine-rich receptor-like protein kinase 42 [Populus trichocarpa]
Pop_A04G002582	SIP1	AT5G40390	Leaf	Epidermis	10.1093/plcell/koaa060	probable galactinol--sucrose galactosyltransferase 5 [Populus trichocarpa]
Pop_A02G012340	---	AT5G41761	Leaf	Epidermis	10.1093/plcell/koaa060	hypothetical protein POPTR_002G167900 [Populus trichocarpa]
Pop_G01G024741	---	AT5G41810	Leaf	Epidermis	10.1093/plcell/koaa060	uncharacterized protein LOC7467099 [Populus trichocarpa]
Pop_A01G059880	---	AT5G42000	Leaf	Epidermis	10.1093/plcell/koaa060	PREDICTED: ORM1-like protein 1 [Populus euphratica]
Pop_A01G059916	---	AT5G42090	Leaf	Epidermis	10.1093/plcell/koaa060	protein GPR107 [Populus trichocarpa]
Pop_A02G066061	---	AT5G43190	Leaf	Epidermis	10.1093/plcell/koaa060	F-box/kelch-repeat protein At5g43190 [Populus trichocarpa]
Pop_A02G033056	---	AT5G44005	Leaf	Epidermis	10.1093/plcell/koaa060	hypothetical protein POPTR_002G257601 [Populus trichocarpa]
Pop_A04G010823	---	AT5G45280	Leaf	Epidermis	10.1093/plcell/koaa060	pectin acetylesterase 11 [Populus trichocarpa]
Pop_A04G019616	---	AT5G45950	Leaf	Epidermis	10.1093/plcell/koaa060	GDSL esterase/lipase At5g45950 [Populus trichocarpa]
Pop_A01G025042	---	AT5G47610	Leaf	Epidermis	10.1093/plcell/koaa060	RING-H2 finger protein ATL79 [Populus trichocarpa]
Pop_G14G088862	EMB1276	AT5G48230	Leaf	Epidermis	10.1093/plcell/koaa060	hypothetical protein POPTR_014G168700 [Populus trichocarpa]
Pop_A08G063886	BXL1	AT5G49360	Leaf	Epidermis	10.1093/plcell/koaa060	putative beta-D-xylosidase [Populus trichocarpa]
Pop_A10G069218	ACLB-2	AT5G49460	Leaf	Epidermis	10.1093/plcell/koaa060	hypothetical protein POPTR_010G145832 [Populus trichocarpa]
Pop_A03G049682	---	AT5G49760	Leaf	Epidermis	10.1093/plcell/koaa060	hypothetical protein POPTR_004G232500 [Populus trichocarpa]
Pop_A01G060007	BAG1	AT5G52060	Leaf	Epidermis	10.1093/plcell/koaa060	BAG family molecular chaperone regulator 2 [Populus trichocarpa]
Pop_A01G017623	---	AT5G54585	Leaf	Epidermis	10.1093/plcell/koaa060	uncharacterized protein LOC18095874 [Populus trichocarpa]
Pop_A01G017614	---	AT5G54630	Leaf	Epidermis	10.1093/plcell/koaa060	PREDICTED: uncharacterized protein LOC105142368 [Populus euphratica]
Pop_G18G011102	---	AT5G54710	Leaf	Epidermis	10.1093/plcell/koaa060	PREDICTED: ankyrin repeat-containing protein At2g01680-like [Populus euphratica]
Pop_A01G058811	MAP65-1	AT5G55230	Leaf	Epidermis	10.1093/plcell/koaa060	65-kDa microtubule-associated protein 1 [Populus trichocarpa]
Pop_A06G061559	---	AT5G57150	Leaf	Epidermis	10.1093/plcell/koaa060	transcription factor bHLH35 isoform X2 [Populus trichocarpa]
Pop_A06G064739	SnRK3.4	AT5G57630	Leaf	Epidermis	10.1093/plcell/koaa060	PREDICTED: CBL-interacting serine/threonine-protein kinase 21-like [Populus euphratica]
Pop_A06G064716	---	AT5G57710	Leaf	Epidermis	10.1093/plcell/koaa060	PREDICTED: uncharacterized protein LOC105115935 [Populus euphratica]
Pop_A06G064897	YRE	AT5G57800	Leaf	Epidermis	10.1093/plcell/koaa060	protein ECERIFERUM 3 isoform X1 [Populus trichocarpa]
Pop_A04G030595	MYBCOV1	AT5G62470	Leaf	Epidermis	10.1093/plcell/koaa060	myb-related protein 306 [Populus trichocarpa]
Pop_A05G071623	MUM2	AT5G63800	Leaf	Epidermis	10.1093/plcell/koaa060	hypothetical protein POPTR_005G069200 [Populus trichocarpa]
Pop_A07G070543	RPT3	AT5G64330	Leaf	Epidermis	10.1093/plcell/koaa060	root phototropism protein 3 [Populus trichocarpa]
Pop_G05G073586	RGF9	AT5G64770	Leaf	Epidermis	10.1093/plcell/koaa060	hypothetical protein POPTR_005G087000 [Populus trichocarpa]
Pop_A05G071969	ANNAT2	AT5G65020	Leaf	Epidermis	10.1093/plcell/koaa060	annexin [Populus tomentosa]
Pop_A07G022723	XTH6	AT5G65730	Leaf	Epidermis	10.1093/plcell/koaa060	xyloglucan endotransglycosylase/hydrolase precursor XTH-36 [Populus tremula x Populus tremuloides]
Pop_A03G050544	SLK2	AT5G62090	Shoot apical	Floral organ primordia	10.1104/pp.109.146183	probable transcriptional regulator SLK2 [Populus trichocarpa]
Pop_A02G012401	---	AT1G01230	Leaf	Guard cell	10.1093/plcell/koaa060	ORM1-like protein 3 [Populus trichocarpa]
Pop_A14G000834	---	AT1G03440	Leaf	Guard cell	10.1093/plcell/koaa060	LRR receptor-like serine/threonine-protein kinase ERECTA [Populus trichocarpa]
Pop_A01G056896	---	AT1G03910	Leaf	Guard cell	10.1093/plcell/koaa060	hypothetical protein POPTR_001G242900 [Populus trichocarpa]
Pop_A01G059968	SDD1	AT1G04110	Leaf	Guard cell	10.1101/gad.14.9.1119	hypothetical protein POPTR_001G113700 [Populus trichocarpa]
Pop_A01G059968	SDD1	AT1G04110	Leaf	Guard cell	10.1146/annurev-arplant-042811-105451	hypothetical protein POPTR_001G113700 [Populus trichocarpa]
Pop_A02G033089	---	AT1G04140	Leaf	Guard cell	10.1093/plcell/koaa060	uncharacterized protein LOC7461479 isoform X1 [Populus trichocarpa]
Pop_A10G047329	PHH1	AT1G04400	Leaf	Guard cell	10.1146/annurev-arplant-042811-105451	cryptochrome-1 isoform X1 [Populus trichocarpa]
Pop_A01G079921	KV-BETA1	AT1G04690	Leaf	Guard cell	10.1093/plcell/koaa060	unknown [Populus trichocarpa]
Pop_A01G010355	SPS3F	AT1G04920	Leaf	Guard cell	10.1093/plcell/koaa060	probable sucrose-phosphate synthase 3 [Populus trichocarpa]
Pop_A19G055083	---	AT1G05720	Leaf	Guard cell	10.1093/plcell/koaa060	selenoprotein F [Populus trichocarpa]
Pop_A02G023817	---	AT1G05835	Leaf	Guard cell	10.1093/plcell/koaa060	uncharacterized protein At1g05835 [Populus trichocarpa]
Pop_A02G065230	---	AT1G06210	Leaf	Guard cell	10.1093/plcell/koaa060	TOM1-like protein 2 [Populus trichocarpa]
Pop_A13G031145	---	AT1G06890	Leaf	Guard cell	10.1093/plcell/koaa060	UDP-xylose transporter 3 [Populus trichocarpa]
Pop_A08G045820	---	AT1G07040	Leaf	Guard cell	10.1093/plcell/koaa060	uncharacterized protein LOC7473254 [Populus trichocarpa]
Pop_A01G056978	NPC1	AT1G07230	Leaf	Guard cell	10.1093/plcell/koaa060	non-specific phospholipase C1 [Populus trichocarpa]
Pop_A04G002539	---	AT1G07990	Leaf	Guard cell	10.1093/plcell/koaa060	PREDICTED: serine/threonine-protein phosphatase 6 regulatory subunit 3 isoform X1 [Populus euphratica]
Pop_A13G010125	ACHT4	AT1G08570	Leaf	Guard cell	10.1093/plcell/koaa060	putative thioredoxin-like 7 [Populus tomentosa]
Pop_A05G071775	PRA1.E	AT1G08770	Leaf	Guard cell	10.1093/plcell/koaa060	PRA1 family protein E [Populus trichocarpa]
Pop_A13G009871	MYB60	AT1G08810	Leaf	Guard cell	10.1016/j.cub.2005.05.048	hypothetical protein [Populus tomentosa]
Pop_A05G071887	VAP27-2	AT1G08820	Leaf	Guard cell	10.1093/plcell/koaa060	vesicle-associated protein 1-2 isoform X2 [Populus trichocarpa]
Pop_A05G016837	---	AT1G09330	Leaf	Guard cell	10.1093/plcell/koaa060	Golgi apparatus membrane protein-like protein ECHIDNA [Populus trichocarpa]
Pop_A13G054066	PHYA	AT1G09570	Leaf	Guard cell	10.1146/annurev-arplant-042811-105451	PREDICTED: phytochrome A [Populus euphratica]
Pop_A02G005118	MPK1	AT1G10210	Leaf	Guard cell	10.1104/pp.18.00475	mitogen-activated protein kinase homolog NTF3 [Populus trichocarpa]
Pop_A10G047677	---	AT1G10410	Leaf	Guard cell	10.1093/plcell/koaa060	uncharacterized protein LOC7492405 isoform X2 [Populus trichocarpa]
Pop_A08G045869	---	AT1G10610	Leaf	Guard cell	10.1093/plcell/koaa060	transcription factor bHLH90 [Populus trichocarpa]
Pop_A02G012572	ATARFA1F	AT1G10630	Leaf	Guard cell	10.1093/plcell/koaa060	hypothetical protein BAE44_0004821 [Dichanthelium oligosanthes]
Pop_A03G049263	TMN1	AT1G10950	Leaf	Guard cell	10.1093/plcell/koaa060	PREDICTED: transmembrane 9 superfamily member 1-like [Populus euphratica]
Pop_A01G060006	STP1	AT1G11260	Leaf	Guard cell	10.1093/plcell/koaa060	monosaccharide transporter [Populus tremula x Populus tremuloides]
Pop_A01G075059	---	AT1G11360	Leaf	Guard cell	10.1093/plcell/koaa060	universal stress protein PHOS34-like [Populus trichocarpa]
Pop_A04G018361	GLX1	AT1G11840	Leaf	Guard cell	10.1093/plcell/koaa060	lactoylglutathione lyase GLX1 isoform X2 [Populus trichocarpa]
Pop_A06G062363	---	AT1G12050	Leaf	Guard cell	10.1093/plcell/koaa060	fumarylacetoacetase [Populus trichocarpa]
Pop_A01G059688	---	AT1G12310	Leaf	Guard cell	10.1093/plcell/koaa060	probable calcium-binding protein CML13 [Populus trichocarpa]
Pop_A09G076932	---	AT1G12400	Leaf	Guard cell	10.1093/plcell/koaa060	hypothetical protein POPTR_001G116000 [Populus trichocarpa]
Pop_A01G059961	SLAC1	AT1G12480	Leaf	Guard cell	10.1038/nature06720	PREDICTED: LOW QUALITY PROTEIN: guard cell S-type anion channel SLAC1, partial [Populus euphratica]
Pop_A01G060009	---	AT1G12640	Leaf	Guard cell	10.1093/plcell/koaa060	lysophospholipid acyltransferase 1 [Populus trichocarpa]
Pop_A08G064033	---	AT1G13380	Leaf	Guard cell	10.1093/plcell/koaa060	uncharacterized protein LOC7488358 [Populus trichocarpa]
Pop_A08G063699	VIK	AT1G14000	Leaf	Guard cell	10.1093/plcell/koaa060	integrin-linked protein kinase 1 [Populus trichocarpa]
Pop_A08G064134	---	AT1G14990	Leaf	Guard cell	10.1093/plcell/koaa060	uncharacterized protein LOC7488401 [Populus trichocarpa]
Pop_A05G073500	RHA2A	AT1G15100	Leaf	Guard cell	10.1093/plcell/koaa060	hypothetical protein POPTR_005G081200 [Populus trichocarpa]
Pop_A16G025108	SYP51	AT1G16240	Leaf	Guard cell	10.1093/plcell/koaa060	syntaxin-52 [Populus trichocarpa]
Pop_A10G046751	---	AT1G16850	Leaf	Guard cell	10.1093/plcell/koaa060	uncharacterized protein LOC7455520 [Populus trichocarpa]
Pop_A01G015619	---	AT1G17080	Leaf	Guard cell	10.1093/plcell/koaa060	PREDICTED: 60S ribosomal protein L18a-like protein [Populus euphratica]
Pop_A01G054827	TIM23-1	AT1G17530	Leaf	Guard cell	10.1093/plcell/koaa060	mitochondrial import inner membrane translocase subunit TIM23-1 [Populus trichocarpa]
Pop_A17G034447	---	AT1G17830	Leaf	Guard cell	10.1093/plcell/koaa060	PREDICTED: uncharacterized protein LOC105140815 [Populus euphratica]
Pop_A08G045923	MKK7	AT1G18350	Leaf	Guard cell	10.1146/annurev-arplant-042811-105451	mitogen-activated protein kinase kinase 9 [Populus trichocarpa]
Pop_A10G069388	---	AT1G18720	Leaf	Guard cell	10.1093/plcell/koaa060	uncharacterized endoplasmic reticulum membrane protein C16E8.02 [Populus trichocarpa]
Pop_A05G001969	---	AT1G19835	Leaf	Guard cell	10.1093/plcell/koaa060	filament-like plant protein 4 [Populus trichocarpa]
Pop_A02G004907	iqd32	AT1G19870	Leaf	Guard cell	10.1093/plcell/koaa060	protein IQ-DOMAIN 32 [Populus trichocarpa]
Pop_A02G005007	---	AT1G20225	Leaf	Guard cell	10.1093/plcell/koaa060	uncharacterized protein LOC7496902 [Populus trichocarpa]
Pop_A02G005098	DPMS1	AT1G20575	Leaf	Guard cell	10.1093/plcell/koaa060	dolichol-phosphate mannosyltransferase subunit 1 [Populus trichocarpa]
Pop_A06G053696	---	AT1G20970	Leaf	Guard cell	10.1093/plcell/koaa060	centromere-associated protein E isoform X1 [Populus trichocarpa]
Pop_A05G057046	---	AT1G21080	Leaf	Guard cell	10.1093/plcell/koaa060	PREDICTED: chaperone protein dnaJ 10-like [Populus euphratica]
Pop_A02G005422	---	AT1G21090	Leaf	Guard cell	10.1093/plcell/koaa060	PREDICTED: uncharacterized protein LOC105138478 [Populus euphratica]
Pop_A02G065659	---	AT1G21660	Leaf	Guard cell	10.1093/plcell/koaa060	auxilin-related protein 2 [Populus trichocarpa]
Pop_A19G053282	PATL2	AT1G22530	Leaf	Guard cell	10.1093/plcell/koaa060	PREDICTED: patellin-3 [Populus euphratica]
Pop_A02G012397	MYB3	AT1G22640	Leaf	Guard cell	10.1093/plcell/koaa060	PREDICTED: myb-related protein 308-like [Populus euphratica]
Pop_A04G026468	---	AT1G23170	Leaf	Guard cell	10.1093/plcell/koaa060	uncharacterized protein LOC7493538 [Populus trichocarpa]
Pop_A05G016790	KNAT6S	AT1G23380	Leaf	Guard cell	10.1093/plcell/koaa060	homeobox protein transcription factor [Populus tomentosa]
Pop_A12G019263	NFD2	AT1G24450	Leaf	Guard cell	10.1093/plcell/koaa060	protein NUCLEAR FUSION DEFECTIVE 2 [Populus trichocarpa]
Pop_A08G063732	CLE9	AT1G26600	Leaf	Guard cell	10.1016/j.devcel.2018.08.007	hypothetical protein POPTR_008G093500 [Populus trichocarpa]
Pop_A08G063700	VTI1B	AT1G26670	Leaf	Guard cell	10.1093/plcell/koaa060	vesicle transport v-SNARE 12 [Populus trichocarpa]
Pop_A10G001116	---	AT1G26940	Leaf	Guard cell	10.1093/plcell/koaa060	PREDICTED: peptidyl-prolyl cis-trans isomerase CYP23 [Populus euphratica]
Pop_A02G005077	APL2	AT1G27680	Leaf	Guard cell	10.1093/plcell/koaa060	glucose-1-phosphate adenylyltransferase large subunit, chloroplastic/amyloplastic [Populus trichocarpa]
Pop_A11G056650	---	AT1G28580	Leaf	Guard cell	10.1093/plcell/koaa060	PREDICTED: GDSL esterase/lipase At1g28580-like [Populus euphratica]
Pop_A04G019631	NUDX15	AT1G28960	Leaf	Guard cell	10.1093/plcell/koaa060	nudix hydrolase 15, mitochondrial [Populus trichocarpa]
Pop_A01G079812	TBL38	AT1G29050	Leaf	Guard cell	10.1093/plcell/koaa060	protein trichome birefringence-like 41 isoform X1 [Populus trichocarpa]
Pop_A04G026025	PEX7	AT1G29260	Leaf	Guard cell	10.1093/plcell/koaa060	peroxisome biogenesis protein 7 [Populus trichocarpa]
Pop_A11G056726	---	AT1G29760	Leaf	Guard cell	10.1093/plcell/koaa060	PREDICTED: uncharacterized protein LOC105135956 [Populus euphratica]
Pop_A04G029339	GA2OX2	AT1G30040	Leaf	Guard cell	10.1093/plcell/koaa060	gibberellin 2-beta-dioxygenase [Populus trichocarpa]
Pop_A04G010838	---	AT1G31730	Leaf	Guard cell	10.1093/plcell/koaa060	AP-4 complex subunit epsilon [Populus trichocarpa]
Pop_A01G004197	---	AT1G32050	Leaf	Guard cell	10.1093/plcell/koaa060	PREDICTED: secretory carrier-associated membrane protein 4-like [Populus euphratica]
Pop_A01G004089	LOL1	AT1G32540	Leaf	Guard cell	10.1093/plcell/koaa060	PREDICTED: uncharacterized protein LOC105765014 isoform X2 [Gossypium raimondii]
Pop_A13G082573	---	AT1G33470	Leaf	Guard cell	10.1093/plcell/koaa060	PREDICTED: RNA-binding protein 24-like isoform X1 [Populus euphratica]
Pop_A01G004242	MOS2	AT1G33520	Leaf	Guard cell	10.1093/plcell/koaa060	protein MOS2 [Populus trichocarpa]
Pop_A13G032426	EPF2	AT1G34245	Leaf	Guard cell	10.1146/annurev-arplant-042811-105451	protein EPIDERMAL PATTERNING FACTOR 2 [Populus trichocarpa]
Pop_A05G071987	STOP1	AT1G34370	Leaf	Guard cell	10.1093/plcell/koaa060	PREDICTED: protein SENSITIVE TO PROTON RHIZOTOXICITY 1-like [Populus euphratica]
Pop_A18G018881	---	AT1G35190	Leaf	Guard cell	10.1093/plcell/koaa060	PREDICTED: probable iron/ascorbate oxidoreductase DDB_G0283291 isoform X1 [Populus euphratica];PREDICTED: probable iron/ascorbate oxidoreductase DDB_G0283291 isoform X2 [Populus euphratica]
Pop_A02G088573	OXY5	AT1G35720	Leaf	Guard cell	10.1093/plcell/koaa060	PREDICTED: annexin D1 [Populus euphratica]
Pop_A02G065544	emb1075	AT1G43710	Leaf	Guard cell	10.1093/plcell/koaa060	serine decarboxylase [Populus trichocarpa]
Pop_A01G032281	---	AT1G45688	Leaf	Guard cell	10.1093/plcell/koaa060	hypothetical protein [Populus tomentosa]
Pop_A01G067198	SCZ	AT1G46264	Leaf	Guard cell	10.1093/plcell/koaa060	heat shock transcription factor B4a [Populus simonii]
Pop_A14G000360	---	AT1G47310	Leaf	Guard cell	10.1093/plcell/koaa060	uncharacterized protein LOC18104955 [Populus trichocarpa]
Pop_A02G023847	DPMS3	AT1G48140	Leaf	Guard cell	10.1093/plcell/koaa060	uncharacterized protein LOC7471159 isoform X1 [Populus trichocarpa]
Pop_A12G073921	SCD1	AT1G49040	Leaf	Guard cell	10.1146/annurev-arplant-042811-105451	PREDICTED: uncharacterized protein LOC105114954 isoform X1 [Populus euphratica]
Pop_A09G026736	NQR	AT1G49670	Leaf	Guard cell	10.1093/plcell/koaa060	prostaglandin reductase-3 [Populus trichocarpa]
Pop_A17G034397	---	AT1G51160	Leaf	Guard cell	10.1093/plcell/koaa060	trafficking protein particle complex subunit 1 [Populus trichocarpa]
Pop_A08G007014	MKK4	AT1G51660	Leaf	Guard cell	10.1146/annurev-arplant-042811-105451	PREDICTED: mitogen-activated protein kinase kinase 5-like isoform X1 [Populus euphratica]
Pop_A01G003858	RAP2.12	AT1G53910	Leaf	Guard cell	10.1093/plcell/koaa060	ethylene-responsive transcription factor RAP2-12 [Populus trichocarpa]
Pop_A05G071767	---	AT1G54460	Leaf	Guard cell	10.1093/plcell/koaa060	PREDICTED: protein WVD2-like 1 isoform X1 [Populus euphratica];protein WVD2-like 2 isoform X1 [Populus trichocarpa]
Pop_A05G071953	---	AT1G54740	Leaf	Guard cell	10.1093/plcell/koaa060	PREDICTED: protein FANTASTIC FOUR 1-like [Populus euphratica]
Pop_A18G013266	IDD7	AT1G55110	Leaf	Guard cell	10.1093/plcell/koaa060	hypothetical protein POPTR_018G052200 [Populus trichocarpa]
Pop_A01G075837	---	AT1G55360	Leaf	Guard cell	10.1093/plcell/koaa060	uncharacterized protein LOC7483235 [Populus trichocarpa]
Pop_A05G016880	---	AT1G56700	Leaf	Guard cell	10.1093/plcell/koaa060	PREDICTED: uncharacterized protein LOC105135693 [Populus euphratica]
Pop_A08G045860	ZCW32	AT1G59640	Leaf	Guard cell	10.1093/plcell/koaa060	transcription factor BHLH094 isoform X1 [Populus trichocarpa]
Pop_A08G045846	E1 ALPHA	AT1G59900	Leaf	Guard cell	10.1093/plcell/koaa060	PREDICTED: pyruvate dehydrogenase E1 component subunit alpha-1, mitochondrial [Populus euphratica]
Pop_A04G018098	TPS4	AT1G61120	Leaf	Guard cell	10.1146/annurev-arplant-042811-105451	(E,E)-geranyllinalool synthase [Populus trichocarpa]
Pop_A05G073595	---	AT1G61170	Leaf	Guard cell	10.1093/plcell/koaa060	hypothetical protein POPTR_005G086300 [Populus trichocarpa]
Pop_A04G018356	ATG8C	AT1G62040	Leaf	Guard cell	10.1093/plcell/koaa060	hypothetical protein POPTR_004G013700 [Populus trichocarpa]
Pop_A02G023876	WRKY6	AT1G62300	Leaf	Guard cell	10.1093/plcell/koaa060	PREDICTED: probable WRKY transcription factor 31 [Populus euphratica]
Pop_A01G004580	BETAVPE	AT1G62710	Leaf	Guard cell	10.1093/plcell/koaa060	PREDICTED: vacuolar-processing enzyme [Populus euphratica]
Pop_A01G059621	---	AT1G63110	Leaf	Guard cell	10.1093/plcell/koaa060	PREDICTED: phosphatidylinositol glycan anchor biosynthesis class U protein isoform X1 [Populus euphratica];hypothetical protein POPTR_001G109200 [Populus trichocarpa]
Pop_A01G059692	YDA	AT1G63700	Leaf	Guard cell	10.1104/pp.18.00475	mitogen-activated protein kinase kinase kinase YODA [Populus trichocarpa]
Pop_A01G059692	YDA	AT1G63700	Leaf	Guard cell	10.1126/science.1096014	mitogen-activated protein kinase kinase kinase YODA [Populus trichocarpa]
Pop_A01G059905	MGL	AT1G64660	Leaf	Guard cell	10.1093/plcell/koaa060	methionine gamma-lyase [Populus trichocarpa]
Pop_G17G033311	---	AT1G65900	Leaf	Guard cell	10.1093/plcell/koaa060	uncharacterized protein LOC18106550 [Populus trichocarpa]
Pop_A12G019388	AR401	AT1G66680	Leaf	Guard cell	10.1093/plcell/koaa060	EEF1A lysine methyltransferase 2 [Populus trichocarpa]
Pop_A02G012648	ZFP6	AT1G67030	Leaf	Guard cell	10.1093/plcell/koaa060	hypothetical protein POPTR_002G199200 [Populus trichocarpa]
Pop_A04G026533	---	AT1G67050	Leaf	Guard cell	10.1093/plcell/koaa060	PREDICTED: uncharacterized protein LOC105123384 isoform X1 [Populus euphratica]
Pop_A04G026538	PMI2	AT1G67070	Leaf	Guard cell	10.1093/plcell/koaa060	mannose-6-phosphate isomerase 1 [Populus trichocarpa]
Pop_A18G018679	NAP3	AT1G67940	Leaf	Guard cell	10.1093/plcell/koaa060	ABC transporter I family member 17 [Populus trichocarpa]
Pop_A08G086509	TPS6	AT1G68020	Leaf	Guard cell	10.1093/plcell/koaa060	PREDICTED: alpha,alpha-trehalose-phosphate synthase [UDP-forming] 6-like [Populus euphratica]
Pop_A08G086491	---	AT1G68070	Leaf	Guard cell	10.1093/plcell/koaa060	E3 ubiquitin protein ligase RIE1 [Populus trichocarpa]
Pop_A10G069295	---	AT1G68220	Leaf	Guard cell	10.1093/plcell/koaa060	uncharacterized protein LOC7459821 [Populus trichocarpa]
Pop_A08G064044	---	AT1G68300	Leaf	Guard cell	10.1093/plcell/koaa060	uncharacterized protein LOC7488363 [Populus trichocarpa]
Pop_A08G063741	WRKY57	AT1G69310	Leaf	Guard cell	10.1093/plcell/koaa060	probable WRKY transcription factor 57 [Populus trichocarpa]
Pop_A08G063677	NAP	AT1G69490	Leaf	Guard cell	10.1093/plcell/koaa060	PREDICTED: cytochrome P450 704B1 [Populus euphratica]
Pop_A08G012030	ATHB13	AT1G69780	Leaf	Guard cell	10.1093/plcell/koaa060	PREDICTED: homeobox-leucine zipper protein ATHB-13-like [Populus euphratica]
Pop_A13G082578	GDPD4	AT1G71340	Leaf	Guard cell	10.1093/plcell/koaa060	PREDICTED: glycerophosphodiester phosphodiesterase GDPD4 [Populus euphratica]
Pop_A09G083673	---	AT1G72010	Leaf	Guard cell	10.1093/plcell/koaa060	transcription factor TCP7 [Populus trichocarpa]
Pop_A04G026509	---	AT1G72690	Leaf	Guard cell	10.1093/plcell/koaa060	PREDICTED: uncharacterized protein LOC105133032 isoform X1 [Populus euphratica]
Pop_A01G054838	CKL2	AT1G72710	Leaf	Guard cell	10.1093/plcell/koaa060	casein kinase 1-like protein 2 isoform X1 [Populus trichocarpa]
Pop_A01G054848	---	AT1G72790	Leaf	Guard cell	10.1093/plcell/koaa060	hydroxyproline-rich glycoprotein [Populus tomentosa]
Pop_A12G073762	MKK9	AT1G73500	Leaf	Guard cell	10.1146/annurev-arplant-042811-105451	mitogen-activated protein kinase kinase 9 [Populus trichocarpa]
Pop_A12G073828	ALPHA DOX2	AT1G73680	Leaf	Guard cell	10.1093/plcell/koaa060	alpha-dioxygenase 2 [Populus trichocarpa]
Pop_A02G066224	BZR1	AT1G75080	Leaf	Guard cell	10.1093/plcell/koaa060	protein BRASSINAZOLE-RESISTANT 1 [Populus trichocarpa]
Pop_A02G005160	STH2	AT1G75540	Leaf	Guard cell	10.1093/plcell/koaa060	COL6-1 [Populus tomentosa]
Pop_A02G004940	---	AT1G75760	Leaf	Guard cell	10.1093/plcell/koaa060	putative ER lumen protein-retaining receptor C28H8.4 [Populus trichocarpa]
Pop_A02G004969	---	AT1G75810	Leaf	Guard cell	10.1093/plcell/koaa060	hypothetical protein POPTR_002G020201 [Populus trichocarpa]
Pop_A05G002093	ERD14	AT1G76180	Leaf	Guard cell	10.1093/plcell/koaa060	dehydrin 1 [Populus alba x Populus glandulosa]
Pop_A02G026879	---	AT1G76460	Leaf	Guard cell	10.1093/plcell/koaa060	PREDICTED: RNA-binding protein 24-B isoform X1 [Populus euphratica]
Pop_A01G024847	HMGR1	AT1G76490	Leaf	Guard cell	10.1093/plcell/koaa060	PREDICTED: 3-hydroxy-3-methylglutaryl-coenzyme A reductase 1-like [Populus euphratica]
Pop_A02G088517	---	AT1G77920	Leaf	Guard cell	10.1093/plcell/koaa060	PREDICTED: transcription factor TGA7 [Populus euphratica]
Pop_A01G015582	BEH4	AT1G78700	Leaf	Guard cell	10.1584/jpestics.D20-001	BES1/BZR1 homolog protein 4 isoform X2 [Populus trichocarpa]
Pop_A01G024381	---	AT1G78800	Leaf	Guard cell	10.1093/plcell/koaa060	PREDICTED: alpha-1,3/1,6-mannosyltransferase ALG2 [Populus euphratica]
Pop_A10G069483	MCP2d	AT1G79340	Leaf	Guard cell	10.1093/plcell/koaa060	metacaspase-4 [Populus trichocarpa]
Pop_A01G079995	---	AT1G79660	Leaf	Guard cell	10.1093/plcell/koaa060	PREDICTED: uncharacterized protein LOC105132679 [Populus euphratica]
Pop_A01G032288	GL2	AT1G79840	Leaf	Guard cell	10.1199/tab.0162	PREDICTED: homeobox-leucine zipper protein GLABRA 2 [Populus euphratica]
Pop_A03G049852	---	AT1G79990	Leaf	Guard cell	10.1093/plcell/koaa060	protein SYS1 homolog [Populus trichocarpa]
Pop_A01G054726	TMM	AT1G80080	Leaf	Guard cell	10.1146/annurev-arplant-042811-105451	protein TOO MANY MOUTHS [Populus trichocarpa]
Pop_A01G003982	CYCA2;4	AT1G80370	Leaf	Guard cell	10.1146/annurev-arplant-042811-105451	cyclin-A2-4 [Populus trichocarpa]
Pop_A14G000285	---	AT1G80950	Leaf	Guard cell	10.1093/plcell/koaa060	lysophospholipid acyltransferase LPEAT1 isoform X1 [Populus trichocarpa]
Pop_A08G064071	PDE331	AT2G01190	Leaf	Guard cell	10.1093/plcell/koaa060	putative uncharacterized protein DDB_G0268364 [Populus trichocarpa]
Pop_A10G000032	STL2P	AT2G01470	Leaf	Guard cell	10.1093/plcell/koaa060	PREDICTED: LOW QUALITY PROTEIN: SEC12-like protein 2 [Populus euphratica]
Pop_A08G002445	---	AT2G01600	Leaf	Guard cell	10.1093/plcell/koaa060	PREDICTED: putative clathrin assembly protein At2g01600 isoform X2 [Populus euphratica]
Pop_A08G086487	---	AT2G01680	Leaf	Guard cell	10.1093/plcell/koaa060	ankyrin repeat-containing protein At2g01680 [Populus trichocarpa]
Pop_A05G055892	---	AT2G01710	Leaf	Guard cell	10.1093/plcell/koaa060	uncharacterized protein LOC7468854 [Populus trichocarpa]
Pop_A06G062882	MEE66	AT2G02240	Leaf	Guard cell	10.1093/plcell/koaa060	PREDICTED: putative F-box protein PP2-B12 [Populus euphratica]
Pop_A13G009828	UBC2	AT2G02760	Leaf	Guard cell	10.1093/plcell/koaa060	ubiquitin-conjugating enzyme E2 2 isoform X2 [Abrus precatorius]
Pop_A08G012026	MYB88	AT2G02820	Leaf	Guard cell	10.1105/tpc.105.034116	PREDICTED: uncharacterized protein LOC105126660 isoform X1 [Populus euphratica]
Pop_A08G063933	UBDK GAMMA 7	AT2G03890	Leaf	Guard cell	10.1093/plcell/koaa060	phosphatidylinositol 3- and 4-kinase family protein [Populus tomentosa]
Pop_A15G048999	---	AT2G04410	Leaf	Guard cell	10.1093/plcell/koaa060	hypothetical protein POPTR_015G089201 [Populus trichocarpa]
Pop_A15G017189	---	AT2G04940	Leaf	Guard cell	10.1093/plcell/koaa060	PREDICTED: altered inheritance rate of mitochondria protein 25 [Populus euphratica]
Pop_A01G010302	VSR3	AT2G14740	Leaf	Guard cell	10.1093/plcell/koaa060	vacuolar-sorting receptor 3 isoform X2 [Populus trichocarpa]
Pop_A16G028711	---	AT2G16790	Leaf	Guard cell	10.1093/plcell/koaa060	PREDICTED: probable gluconokinase isoform X1 [Populus euphratica]
Pop_A05G073277	---	AT2G17550	Leaf	Guard cell	10.1093/plcell/koaa060	uncharacterized protein LOC7480463 [Populus trichocarpa]
Pop_A06G064908	---	AT2G18670	Leaf	Guard cell	10.1093/plcell/koaa060	hypothetical protein POPTR_006G175700 [Populus trichocarpa]
Pop_A08G063856	PHYB	AT2G18790	Leaf	Guard cell	10.1016/j.cub.2014.03.074	Phytochrome B family protein [Populus tomentosa]
Pop_A08G063856	PHYB	AT2G18790	Leaf	Guard cell	10.1146/annurev-arplant-042811-105451	Phytochrome B family protein [Populus tomentosa]
Pop_A06G064759	---	AT2G18840	Leaf	Guard cell	10.1093/plcell/koaa060	protein YIPF6 homolog [Populus trichocarpa]
Pop_A04G018060	---	AT2G20740	Leaf	Guard cell	10.1093/plcell/koaa060	tetraspanin-19 isoform X2 [Populus trichocarpa]
Pop_A11G020345	EPF1	AT2G20875	Leaf	Guard cell	10.1146/annurev-arplant-042811-105451	hypothetical protein POPTR_011G123000 [Populus trichocarpa]
Pop_A04G028302	BPC4	AT2G21240	Leaf	Guard cell	10.1093/plcell/koaa060	protein BASIC PENTACYSTEINE4 [Populus trichocarpa]
Pop_A04G028320	---	AT2G21250	Leaf	Guard cell	10.1093/plcell/koaa060	PREDICTED: NADP-dependent D-sorbitol-6-phosphate dehydrogenase-like [Populus euphratica]
Pop_A07G006464	MIPS2	AT2G22240	Leaf	Guard cell	10.1093/plcell/koaa060	inositol-3-phosphate synthase [Populus trichocarpa]
Pop_A05G072006	---	AT2G22420	Leaf	Guard cell	10.1093/plcell/koaa060	peroxidase 17 [Populus trichocarpa]
Pop_A05G072021	HB6	AT2G22430	Leaf	Guard cell	10.1023/A:1006267013170	homeobox-leucine zipper protein ATHB-6 isoform X1 [Populus trichocarpa]
Pop_A05G072021	HB6	AT2G22430	Leaf	Guard cell	10.1093/plcell/koaa060	homeobox-leucine zipper protein ATHB-6 isoform X1 [Populus trichocarpa]
Pop_A02G005557	---	AT2G22660	Leaf	Guard cell	10.1093/plcell/koaa060	glycine-rich domain-containing protein 2 isoform X1 [Populus trichocarpa]
Pop_A18G018722	---	AT2G23940	Leaf	Guard cell	10.1093/plcell/koaa060	PREDICTED: transmembrane protein 208-like [Populus euphratica]
Pop_A18G089839	---	AT2G24290	Leaf	Guard cell	10.1093/plcell/koaa060	uncharacterized protein LOC7489461 [Populus trichocarpa]
Pop_G06G003012	---	AT2G25310	Leaf	Guard cell	10.1093/plcell/koaa060	ER membrane protein complex subunit 7 homolog isoform X2 [Populus trichocarpa]
Pop_A18G012773	---	AT2G25770	Leaf	Guard cell	10.1093/plcell/koaa060	lachrymatory-factor synthase [Populus trichocarpa]
Pop_A06G053407	---	AT2G25780	Leaf	Guard cell	10.1093/plcell/koaa060	uncharacterized protein LOC7462295 [Populus trichocarpa]
Pop_A06G053746	---	AT2G25910	Leaf	Guard cell	10.1093/plcell/koaa060	uncharacterized protein LOC7462279 [Populus trichocarpa]
Pop_A18G013138	---	AT2G25950	Leaf	Guard cell	10.1093/plcell/koaa060	PITH domain-containing protein 1 [Populus trichocarpa]
Pop_A01G054534	emb1345	AT2G26060	Leaf	Guard cell	10.1093/plcell/koaa060	thaumatin-like protein 1 [Populus trichocarpa]
Pop_A18G012749	QRP1	AT2G26330	Leaf	Guard cell	10.1126/science.1109710	hypothetical protein GLYMA_06G056400 [Glycine max]
Pop_A18G012749	QRP1	AT2G26330	Leaf	Guard cell	10.1146/annurev-arplant-042811-105451	hypothetical protein GLYMA_06G056400 [Glycine max]
Pop_A01G067183	SCAB1	AT2G26770	Leaf	Guard cell	10.1093/plcell/koaa060	PREDICTED: uncharacterized protein LOC105126009 isoform X1 [Populus euphratica]
Pop_A05G001926	PAP12	AT2G27190	Leaf	Guard cell	10.1093/plcell/koaa060	purple acid phosphatase 2 isoform X1 [Populus trichocarpa]
Pop_A09G028972	GLYI8	AT2G28420	Leaf	Guard cell	10.1093/plcell/koaa060	lactoylglutathione lyase [Populus trichocarpa]
Pop_A01G056847	XBAT31	AT2G28840	Leaf	Guard cell	10.1093/plcell/koaa060	putative E3 ubiquitin-protein ligase XBAT31 [Populus trichocarpa]
Pop_A01G056993	CYP5	AT2G29960	Leaf	Guard cell	10.1093/plcell/koaa060	peptidyl-prolyl cis-trans isomerase CYP20-1 [Populus trichocarpa]
Pop_A01G005882	---	AT2G30060	Leaf	Guard cell	10.1093/plcell/koaa060	0
Pop_A13G031152	EPFL6	AT2G30370	Leaf	Guard cell	10.1146/annurev-arplant-042811-105451	PREDICTED: EPIDERMAL PATTERNING FACTOR-like protein 6 isoform X2 [Populus euphratica]
Pop_A01G004559	WRKY21	AT2G30590	Leaf	Guard cell	10.1093/plcell/koaa060	WRKY transcription factor 22 [(Populus tomentosa x Populus bolleana) x Populus tomentosa]
Pop_A01G003903	CCT1	AT2G32260	Leaf	Guard cell	10.1093/plcell/koaa060	choline-phosphate cytidylyltransferase 1 isoform X2 [Populus trichocarpa]
Pop_A04G018450	FUS1	AT2G32950	Leaf	Guard cell	10.1146/annurev-arplant-042811-105451	E3 ubiquitin-protein ligase COP1 isoform X1 [Populus trichocarpa]
Pop_A12G073789	---	AT2G33730	Leaf	Guard cell	10.1093/plcell/koaa060	PREDICTED: DEAD-box ATP-dependent RNA helicase 21-like [Populus euphratica]
Pop_A04G019597	ETT	AT2G33860	Leaf	Guard cell	10.1093/plcell/koaa060	PREDICTED: auxin response factor 3-like [Populus euphratica]
Pop_A11G091392	---	AT2G34585	Leaf	Guard cell	10.1093/plcell/koaa060	hypothetical protein POPTR_T074800 [Populus trichocarpa]
Pop_A01G004163	DAD2	AT2G35520	Leaf	Guard cell	10.1093/plcell/koaa060	hypothetical protein POPTR_001G136800 [Populus trichocarpa];PREDICTED: dolichyl-diphosphooligosaccharide--protein glycosyltransferase subunit DAD1 [Populus euphratica]
Pop_A16G055209	---	AT2G35900	Leaf	Guard cell	10.1093/plcell/koaa060	uncharacterized protein LOC7469927 [Populus trichocarpa]
Pop_A15G049000	GSL8	AT2G36850	Leaf	Guard cell	10.1146/annurev-arplant-042811-105451	callose synthase 10 [Populus trichocarpa]
Pop_A15G049000	GSL8	AT2G36850	Leaf	Guard cell	10.1146/annurev-arplant-042811-105451	callose synthase 10 [Populus trichocarpa]
Pop_A08G002301	NF-YB8	AT2G37060	Leaf	Guard cell	10.1093/plcell/koaa060	PREDICTED: nuclear transcription factor Y subunit B-1 isoform X3 [Populus euphratica]
Pop_A06G089383	RCAR10	AT2G38310	Leaf	Guard cell	10.1093/plcell/koaa060	abscisic acid receptor PYL4 [Populus trichocarpa]
Pop_A06G089629	---	AT2G38610	Leaf	Guard cell	10.1093/plcell/koaa060	KH domain-containing protein At2g38610 isoform X2 [Populus trichocarpa]
Pop_A06G089606	---	AT2G38640	Leaf	Guard cell	10.1093/plcell/koaa060	protein LURP-one-related 8 [Populus trichocarpa]
Pop_A13G010054	EULS3	AT2G39050	Leaf	Guard cell	10.1093/plcell/koaa060	0
Pop_A08G064173	---	AT2G39630	Leaf	Guard cell	10.1093/plcell/koaa060	dolichyl-phosphate beta-glucosyltransferase isoform X1 [Populus trichocarpa]
Pop_A08G063375	---	AT2G39805	Leaf	Guard cell	10.1093/plcell/koaa060	protein YIPF1 homolog [Populus trichocarpa]
Pop_A01G003953	HOS1	AT2G39810	Leaf	Guard cell	10.1093/plcell/koaa060	E3 ubiquitin-protein ligase HOS1 [Populus trichocarpa]
Pop_A08G063461	---	AT2G40120	Leaf	Guard cell	10.1093/plcell/koaa060	serine/threonine-protein kinase spk-1 isoform X1 [Populus trichocarpa]
Pop_A02G012672	ERS1	AT2G40940	Leaf	Guard cell	10.1093/plcell/koaa060	0
Pop_A06G061969	BZIP17	AT2G40950	Leaf	Guard cell	10.1093/plcell/koaa060	LOW QUALITY PROTEIN: bZIP transcription factor 17 [Populus trichocarpa]
Pop_A06G061922	---	AT2G41190	Leaf	Guard cell	10.1093/plcell/koaa060	amino acid transporter AVT1A [Populus trichocarpa]
Pop_A06G062223	SFGH	AT2G41530	Leaf	Guard cell	10.1093/plcell/koaa060	S-formylglutathione hydrolase [Populus trichocarpa]
Pop_A06G062242	VLN2	AT2G41740	Leaf	Guard cell	10.1093/plcell/koaa060	PREDICTED: villin-3-like isoform X2 [Populus euphratica]
Pop_A12G073903	---	AT2G42780	Leaf	Guard cell	10.1093/plcell/koaa060	uncharacterized protein LOC7470750 [Populus trichocarpa]
Pop_A01G059731	MPK6	AT2G43790	Leaf	Guard cell	10.1104/pp.18.00475	PREDICTED: mitogen-activated protein kinase homolog MMK2-like [Populus euphratica]
Pop_A01G059731	MPK6	AT2G43790	Leaf	Guard cell	10.1105/tpc.106.048298	PREDICTED: mitogen-activated protein kinase homolog MMK2-like [Populus euphratica]
Pop_A07G085204	GDI1	AT2G44100	Leaf	Guard cell	10.1093/plcell/koaa060	PREDICTED: guanosine nucleotide diphosphate dissociation inhibitor 1-like [Populus euphratica]
Pop_A01G054780	---	AT2G44310	Leaf	Guard cell	10.1093/plcell/koaa060	calcium-binding EF hand family protein [Populus tomentosa]
Pop_A01G054796	---	AT2G44410	Leaf	Guard cell	10.1093/plcell/koaa060	PREDICTED: uncharacterized protein LOC105109328 [Populus euphratica]
Pop_A01G004043	RAB6A	AT2G44610	Leaf	Guard cell	10.1093/plcell/koaa060	PREDICTED: ras-related protein RABH1b-like isoform X1 [Populus euphratica]
Pop_A01G081876	---	AT2G45600	Leaf	Guard cell	10.1093/plcell/koaa060	probable carboxylesterase 8 [Populus trichocarpa]
Pop_A14G044770	---	AT2G46000	Leaf	Guard cell	10.1093/plcell/koaa060	uncharacterized protein LOC7496977 [Populus trichocarpa]
Pop_A02G012360	---	AT2G46420	Leaf	Guard cell	10.1093/plcell/koaa060	uncharacterized protein LOC7497245 isoform X1 [Populus trichocarpa]
Pop_A06G053716	---	AT2G46490	Leaf	Guard cell	10.1093/plcell/koaa060	hypothetical protein POPTR_006G189600 [Populus trichocarpa]
Pop_A01G025072	ZAT1	AT2G46800	Leaf	Guard cell	10.1093/plcell/koaa060	metal tolerance protein 1 [Populus trichocarpa]
Pop_A02G012587	WRKY23	AT2G47260	Leaf	Guard cell	10.1093/plcell/koaa060	probable WRKY transcription factor 23 isoform X1 [Populus trichocarpa]
Pop_A14G000781	---	AT2G47780	Leaf	Guard cell	10.1093/plcell/koaa060	stress-related protein [Populus trichocarpa]
Pop_A04G010944	---	AT3G01170	Leaf	Guard cell	10.1093/plcell/koaa060	uncharacterized protein At5g19025 [Populus trichocarpa]
Pop_A04G026375	---	AT3G02360	Leaf	Guard cell	10.1093/plcell/koaa060	hypothetical protein POPTR_T017600 [Populus trichocarpa]
Pop_A04G026524	STE1	AT3G02580	Leaf	Guard cell	10.1093/plcell/koaa060	PREDICTED: delta(7)-sterol-C5(6)-desaturase 1-like [Populus euphratica]
Pop_A08G063557	---	AT3G02630	Leaf	Guard cell	10.1093/plcell/koaa060	stearoyl-[acyl-carrier-protein] 9-desaturase, chloroplastic isoform X1 [Populus trichocarpa]
Pop_A04G029215	---	AT3G02700	Leaf	Guard cell	10.1093/plcell/koaa060	uncharacterized protein LOC7493598 isoform X1 [Populus trichocarpa]
Pop_A19G052932	---	AT3G02740	Leaf	Guard cell	10.1093/plcell/koaa060	aspartic proteinase-like protein 2 isoform X1 [Populus trichocarpa]
Pop_A08G058026	LCAT3	AT3G03310	Leaf	Guard cell	10.1093/plcell/koaa060	PREDICTED: phospholipase A(1) LCAT3 [Populus euphratica]
Pop_A13G011508	---	AT3G04350	Leaf	Guard cell	10.1093/plcell/koaa060	uncharacterized protein LOC7474632 [Populus trichocarpa]
Pop_A05G071894	---	AT3G05000	Leaf	Guard cell	10.1093/plcell/koaa060	PREDICTED: trafficking protein particle complex subunit 6B-like [Populus euphratica]
Pop_A08G012014	NP3	AT3G06030	Leaf	Guard cell	10.1093/plcell/koaa060	mitogen-activated protein kinase kinase kinase NPK1 isoform X2 [Populus trichocarpa]
Pop_A08G009146	GATA15	AT3G06740	Leaf	Guard cell	10.1093/plcell/koaa060	PREDICTED: GATA transcription factor 15-like [Populus euphratica]
Pop_A14G045436	---	AT3G07760	Leaf	Guard cell	10.1093/plcell/koaa060	uncharacterized protein LOC7455998 [Populus trichocarpa]
Pop_A01G004248	---	AT3G07870	Leaf	Guard cell	10.1093/plcell/koaa060	PREDICTED: F-box/kelch-repeat protein At3g23880-like [Populus euphratica]
Pop_A08G002383	---	AT3G07950	Leaf	Guard cell	10.1093/plcell/koaa060	PREDICTED: transmembrane protein 115-like [Populus euphratica]
Pop_A01G056997	PLC2	AT3G08510	Leaf	Guard cell	10.1093/plcell/koaa060	phospholipase C [Populus tomentosa]
Pop_A16G028818	---	AT3G09320	Leaf	Guard cell	10.1093/plcell/koaa060	PREDICTED: probable protein S-acyltransferase 16 isoform X1 [Populus euphratica]
Pop_A06G061459	---	AT3G09470	Leaf	Guard cell	10.1093/plcell/koaa060	PREDICTED: UNC93-like protein 3 [Populus euphratica]
Pop_A06G085693	---	AT3G09730	Leaf	Guard cell	10.1093/plcell/koaa060	uncharacterized protein LOC18100222 [Populus trichocarpa]
Pop_A06G085831	LOG2	AT3G09770	Leaf	Guard cell	10.1093/plcell/koaa060	probable E3 ubiquitin-protein ligase LOG2 [Populus trichocarpa]
Pop_A06G061893	---	AT3G10250	Leaf	Guard cell	10.1093/plcell/koaa060	uncharacterized protein LOC7496087 isoform X1 [Populus trichocarpa]
Pop_A08G058052	SCPL49	AT3G10410	Leaf	Guard cell	10.1093/plcell/koaa060	Serine carboxypeptidase precursor family protein [Populus tomentosa]
Pop_A06G061965	---	AT3G10760	Leaf	Guard cell	10.1093/plcell/koaa060	transcription factor MYBC1 [Populus trichocarpa]
Pop_A03G049303	RABD1	AT3G11730	Leaf	Guard cell	10.1093/plcell/koaa060	PREDICTED: ras-related protein RABD1-like [Populus euphratica]
Pop_A04G019456	---	AT3G11800	Leaf	Guard cell	10.1093/plcell/koaa060	PREDICTED: uncharacterized protein LOC105111893 [Populus euphratica]
Pop_A01G059813	RBR1	AT3G12280	Leaf	Guard cell	10.7554/eLife.03271	PREDICTED: retinoblastoma-related protein isoform X1 [Populus euphratica]
Pop_A04G070659	PR3	AT3G12500	Leaf	Guard cell	10.1093/plcell/koaa060	PREDICTED: endochitinase 2-like [Populus euphratica]
Pop_A01G024877	BRG3	AT3G12920	Leaf	Guard cell	10.1093/plcell/koaa060	probable BOI-related E3 ubiquitin-protein ligase 3 [Populus trichocarpa]
Pop_A01G059848	FUS9	AT3G13550	Leaf	Guard cell	10.1007/s00425-012-1617-y	PREDICTED: constitutive photomorphogenesis protein 10 isoform X2 [Populus euphratica]
Pop_A03G049797	TMN7	AT3G13772	Leaf	Guard cell	10.1093/plcell/koaa060	PREDICTED: transmembrane 9 superfamily member 7 [Populus euphratica]
Pop_G01G075132	---	AT3G14410	Leaf	Guard cell	10.1093/plcell/koaa060	PREDICTED: probable sugar phosphate/phosphate translocator At3g14410 [Populus euphratica]
Pop_A06G063209	PLDALPHA1	AT3G15730	Leaf	Guard cell	10.1093/plcell/koaa060	phospholipase D alpha 1 [Populus trichocarpa]
Pop_A01G004115	---	AT3G15940	Leaf	Guard cell	10.1093/plcell/koaa060	PREDICTED: uncharacterized protein LOC105109641 isoform X1 [Populus euphratica]
Pop_A01G032312	---	AT3G16270	Leaf	Guard cell	10.1093/plcell/koaa060	PREDICTED: VHS domain-containing protein At3g16270 isoform X1 [Populus euphratica]
Pop_A08G063885	ACN1	AT3G16910	Leaf	Guard cell	10.1093/plcell/koaa060	acetate/butyrate--CoA ligase AAE7, peroxisomal [Populus trichocarpa]
Pop_A10G069198	---	AT3G17020	Leaf	Guard cell	10.1093/plcell/koaa060	PREDICTED: universal stress protein A-like protein [Populus euphratica]
Pop_A03G050455	TDX	AT3G17880	Leaf	Guard cell	10.1093/plcell/koaa060	PREDICTED: FAM10 family protein At4g22670-like isoform X1 [Populus euphratica]
Pop_A04G019575	---	AT3G17950	Leaf	Guard cell	10.1093/plcell/koaa060	uncharacterized protein LOC18109819 [Populus trichocarpa]
Pop_A12G073821	MPK9	AT3G18040	Leaf	Guard cell	10.1093/plcell/koaa060	mitogen-activated protein kinase 9 [Populus trichocarpa]
Pop_A01G059761	AtALMT9	AT3G18440	Leaf	Guard cell	10.1093/plcell/koaa060	aluminum-activated malate transporter 9 [Populus trichocarpa]
Pop_A04G019531	RABG3F	AT3G18820	Leaf	Guard cell	10.1093/plcell/koaa060	PREDICTED: ras-related protein Rab7 [Populus euphratica]
Pop_A01G010223	PTEN2A	AT3G19420	Leaf	Guard cell	10.1093/plcell/koaa060	hypothetical protein [Populus tomentosa]
Pop_A05G071691	---	AT3G20015	Leaf	Guard cell	10.1093/plcell/koaa060	PREDICTED: protein ASPARTIC PROTEASE IN GUARD CELL 2-like [Populus euphratica]
Pop_A08G006902	PUM5	AT3G20250	Leaf	Guard cell	10.1093/plcell/koaa060	pumilio homolog 5 [Populus trichocarpa]
Pop_A01G032082	---	AT3G20920	Leaf	Guard cell	10.1093/plcell/koaa060	translocation protein sec62 isoform X1 [Populus trichocarpa]
Pop_A11G086325	---	AT3G21610	Leaf	Guard cell	10.1093/plcell/koaa060	uncharacterized protein LOC7483617 [Populus trichocarpa]
Pop_A07G036507	PEX22	AT3G21865	Leaf	Guard cell	10.1093/plcell/koaa060	peroxisome biogenesis protein 22 [Populus trichocarpa]
Pop_A06G062078	---	AT3G22290	Leaf	Guard cell	10.1093/plcell/koaa060	PREDICTED: endoplasmic reticulum-Golgi intermediate compartment protein 3-like [Populus euphratica]
Pop_A14G045276	---	AT3G23690	Leaf	Guard cell	10.1093/plcell/koaa060	transcription factor bHLH77 isoform X2 [Populus trichocarpa]
Pop_A02G023780	XTH16	AT3G23730	Leaf	Guard cell	10.1093/plcell/koaa060	xyloglucan endotransglycosylase/hydrolase precursor XTH-21 [Populus tremula x Populus tremuloides]
Pop_A01G010392	FMA	AT3G24140	Leaf	Guard cell	10.2307/20076803	PREDICTED: transcription factor FAMA isoform X2 [Populus euphratica];transcription factor FAMA isoform X1 [Populus trichocarpa]
Pop_A01G010392	FMA	AT3G24140	Leaf	Guard cell	10.1093/plcell/koaa060	PREDICTED: transcription factor FAMA isoform X2 [Populus euphratica];transcription factor FAMA isoform X1 [Populus trichocarpa]
Pop_A01G010392	FMA	AT3G24140	Stoma	Guard cell	10.1111/tpj.12244	PREDICTED: transcription factor FAMA isoform X2 [Populus euphratica];transcription factor FAMA isoform X1 [Populus trichocarpa]
Pop_A18G018951	HSFC1	AT3G24520	Leaf	Guard cell	10.1093/plcell/koaa060	heat stress transcription factor C-1 [Populus trichocarpa]
Pop_G02G015855	CLE41	AT3G24770	Leaf	Guard cell	10.1093/plcell/koaa060	CLAVATA3/ESR (CLE)-related protein 41 [Populus trichocarpa]
Pop_A01G079887	PRT1	AT3G24800	Leaf	Guard cell	10.1093/plcell/koaa060	PREDICTED: E3 ubiquitin-protein ligase PRT1-like isoform X1 [Populus euphratica]
Pop_A10G069073	ABCG21	AT3G25620	Leaf	Guard cell	10.1093/plcell/koaa060	ABC transporter G family member 21 isoform X1 [Populus trichocarpa]
Pop_A12G067922	SCRM	AT3G26744	Leaf	Guard cell	10.1093/plcell/koaa060	inducer of CBF expression 2 protein [Populus suaveolens]
Pop_A01G032182	---	AT3G26935	Leaf	Guard cell	10.1093/plcell/koaa060	probable protein S-acyltransferase 7 isoform X1 [Populus trichocarpa];probable protein S-acyltransferase 7 isoform X2 [Populus trichocarpa]
Pop_A01G032231	---	AT3G27090	Leaf	Guard cell	10.1093/plcell/koaa060	PREDICTED: B2 protein isoform X1 [Populus euphratica]
Pop_A01G067247	PUX1	AT3G27310	Leaf	Guard cell	10.1093/plcell/koaa060	PREDICTED: tether containing UBX domain for GLUT4-like isoform X1 [Populus euphratica]
Pop_A06G061842	---	AT3G29170	Leaf	Guard cell	10.1093/plcell/koaa060	transmembrane protein 230 [Populus trichocarpa]
Pop_A08G063744	UGD2	AT3G29360	Leaf	Guard cell	10.1093/plcell/koaa060	UDP-glucose 6-dehydrogenase 5-like protein [Populus tomentosa]
Pop_A04G026460	MES11	AT3G29770	Leaf	Guard cell	10.1093/plcell/koaa060	putative methylesterase 11, chloroplastic [Populus trichocarpa]
Pop_A09G083685	---	AT3G45040	Leaf	Guard cell	10.1093/plcell/koaa060	dolichol kinase EVAN [Populus trichocarpa]
Pop_A01G067177	MPK3	AT3G45640	Leaf	Guard cell	10.1104/pp.18.00475	mitogen-activated protein kinase 3 [Populus trichocarpa]
Pop_A01G067177	MPK3	AT3G45640	Leaf	Guard cell	10.1105/tpc.106.048298	mitogen-activated protein kinase 3 [Populus trichocarpa]
Pop_A08G063729	RABE1c	AT3G46060	Leaf	Guard cell	10.1093/plcell/koaa060	ras-related protein RABE1c [Populus trichocarpa]
Pop_A01G054566	UXS5	AT3G46440	Leaf	Guard cell	10.1093/plcell/koaa060	UDP-glucuronate decarboxylase protein 3 [Populus tomentosa]
Pop_A01G056844	---	AT3G46450	Leaf	Guard cell	10.1093/plcell/koaa060	PREDICTED: uncharacterized protein LOC105107892 [Populus euphratica]
Pop_A06G085796	TCP14	AT3G47620	Leaf	Guard cell	10.1093/plcell/koaa060	PREDICTED: transcription factor TCP11 [Populus euphratica]
Pop_A01G059631	---	AT3G47670	Leaf	Guard cell	10.1093/plcell/koaa060	pectinesterase 3 [Populus trichocarpa]
Pop_A16G090227	CYP71A25	AT3G48280	Leaf	Guard cell	10.1093/plcell/koaa060	hypothetical protein POPTR_016G137400 [Populus trichocarpa]
Pop_A17G075152	CXE12	AT3G48690	Leaf	Guard cell	10.1093/plcell/koaa060	2-hydroxyisoflavanone dehydratase [Populus trichocarpa]
Pop_A04G030676	CDKA;1	AT3G48750	Leaf	Guard cell	10.1093/plcell/koaa060	cell division control protein 2 homolog A [Populus trichocarpa]
Pop_A12G081655	iqd21	AT3G49260	Leaf	Guard cell	10.1093/plcell/koaa060	PREDICTED: protein IQ-DOMAIN 1 isoform X2 [Populus euphratica]
Pop_A07G022754	---	AT3G49800	Leaf	Guard cell	10.1093/plcell/koaa060	PREDICTED: uncharacterized protein LOC105130475 [Populus euphratica]
Pop_A04G002615	CEN2	AT3G50360	Leaf	Guard cell	10.1093/plcell/koaa060	PREDICTED: sorcin-like isoform X2 [Populus euphratica]
Pop_A05G073064	---	AT3G50845	Leaf	Guard cell	10.1093/plcell/koaa060	hypothetical protein POPTR_005G123100 [Populus trichocarpa]
Pop_A05G073119	---	AT3G51130	Leaf	Guard cell	10.1093/plcell/koaa060	UPF0183 protein At3g51130 isoform X1 [Populus trichocarpa]
Pop_A16G090006	---	AT3G51670	Leaf	Guard cell	10.1093/plcell/koaa060	PREDICTED: patellin-6 [Populus euphratica]
Pop_A08G063446	NFD1	AT3G51880	Leaf	Guard cell	10.1093/plcell/koaa060	high mobility group B protein 1 [Populus trichocarpa]
Pop_A08G006894	---	AT3G52240	Leaf	Guard cell	10.1093/plcell/koaa060	uncharacterized protein LOC7479827 isoform X1 [Populus trichocarpa]
Pop_A06G089325	VSR1;1	AT3G52850	Leaf	Guard cell	10.1093/plcell/koaa060	vacuolar-sorting receptor 1 isoform X1 [Populus trichocarpa]
Pop_A16G017538	UXS1	AT3G53520	Leaf	Guard cell	10.1093/plcell/koaa060	UDP-glucuronic acid decarboxylase 1 [Populus tomentosa]
Pop_A08G006844	---	AT3G54290	Leaf	Guard cell	10.1093/plcell/koaa060	uncharacterized protein LOC7490892 [Populus trichocarpa]
Pop_A08G006842	VAMP727	AT3G54300	Leaf	Guard cell	10.1093/plcell/koaa060	vesicle-associated membrane protein 727 [Populus trichocarpa];PREDICTED: vesicle-associated membrane protein 727 [Populus euphratica]
Pop_A08G002344	VPS33	AT3G54860	Leaf	Guard cell	10.1093/plcell/koaa060	vacuolar protein-sorting-associated protein 33 homolog isoform X1 [Populus trichocarpa];vacuolar protein-sorting-associated protein 33 homolog isoform X2 [Populus trichocarpa]
Pop_A06G053444	---	AT3G55140	Leaf	Guard cell	10.1093/plcell/koaa060	unknown [Populus trichocarpa]
Pop_A08G063873	---	AT3G55390	Leaf	Guard cell	10.1093/plcell/koaa060	PREDICTED: CASP-like protein 4C1 [Populus euphratica]
Pop_A08G064184	---	AT3G55420	Leaf	Guard cell	10.1093/plcell/koaa060	hypothetical protein [Populus tomentosa]
Pop_A08G063431	EPC1	AT3G55830	Leaf	Guard cell	10.1093/plcell/koaa060	glycosyltransferase family 64 protein C4 [Populus trichocarpa]
Pop_A08G058019	ASNAP	AT3G56190	Leaf	Guard cell	10.1093/plcell/koaa060	alpha-soluble NSF attachment protein 2 [Populus trichocarpa]
Pop_A19G052949	RR17	AT3G56380	Leaf	Guard cell	10.1016/j.devcel.2018.08.007	PREDICTED: two-component response regulator ARR17 [Populus euphratica]
Pop_A08G063912	---	AT3G57030	Leaf	Guard cell	10.1093/plcell/koaa060	protein STRICTOSIDINE SYNTHASE-LIKE 10 [Populus trichocarpa]
Pop_A06G062282	---	AT3G57070	Leaf	Guard cell	10.1093/plcell/koaa060	uncharacterized protein At5g39865 [Populus trichocarpa]
Pop_A05G073068	AGL16	AT3G57230	Leaf	Guard cell	10.1111/j.1365-313X.2000.00891.x	hypothetical protein POPTR_005G150501 [Populus trichocarpa]
Pop_A05G073068	AGL16	AT3G57230	Leaf	Guard cell	10.1111/j.1365-313X.2000.00891.x	hypothetical protein POPTR_005G150501 [Populus trichocarpa]
Pop_A06G079482	---	AT3G57340	Leaf	Guard cell	10.1093/plcell/koaa060	PREDICTED: chaperone protein dnaJ 49-like isoform X2 [Populus euphratica]
Pop_A06G061828	---	AT3G57600	Leaf	Guard cell	10.1093/plcell/koaa060	PREDICTED: dehydration-responsive element-binding protein 2F [Populus euphratica]
Pop_A06G053689	---	AT3G58000	Leaf	Guard cell	10.1093/plcell/koaa060	VQ motif-containing protein 25 [Populus trichocarpa]
Pop_A02G065264	BS14A	AT3G58170	Leaf	Guard cell	10.1093/plcell/koaa060	Bet1-like SNARE 1-1 family protein [Populus tomentosa]
Pop_A12G073764	---	AT3G58600	Leaf	Guard cell	10.1093/plcell/koaa060	uncharacterized protein LOC112325051 [Populus trichocarpa]
Pop_A02G031323	---	AT3G58640	Leaf	Guard cell	10.1093/plcell/koaa060	serine/threonine-protein kinase EDR1 isoform X2 [Populus trichocarpa]
Pop_A02G066317	---	AT3G60520	Leaf	Guard cell	10.1093/plcell/koaa060	uncharacterized protein LOC7453943 [Populus trichocarpa]
Pop_A01G003990	VAP27-1	AT3G60600	Leaf	Guard cell	10.1093/plcell/koaa060	vesicle-associated protein 1-2 [Populus trichocarpa]
Pop_A01G024819	iqd17	AT4G00820	Leaf	Guard cell	10.1093/plcell/koaa060	protein IQ-DOMAIN 1 [Populus trichocarpa]
Pop_A14G044811	---	AT4G01280	Leaf	Guard cell	10.1093/plcell/koaa060	PREDICTED: protein REVEILLE 5 isoform X2 [Populus euphratica];protein REVEILLE 5 [Populus trichocarpa]
Pop_A02G012284	MPK4	AT4G01370	Leaf	Guard cell	10.1105/tpc.106.048298	mitogen-activated protein kinase homolog MMK2 isoform X1 [Populus trichocarpa]
Pop_A02G012518	MYB55	AT4G01680	Leaf	Guard cell	10.1093/plcell/koaa060	transcription factor MYB61 [Populus trichocarpa]
Pop_A02G066249	CRK	AT4G01710	Leaf	Guard cell	10.1093/plcell/koaa060	actin-related protein 2/3 complex subunit 5A [Populus trichocarpa];hypothetical protein POPTR_002G136500 [Populus trichocarpa]
Pop_A02G012681	SUS3	AT4G02280	Leaf	Guard cell	10.1093/plcell/koaa060	sucrose synthase [Populus tomentosa]
Pop_A02G012686	---	AT4G02340	Leaf	Guard cell	10.1093/plcell/koaa060	uncharacterized protein LOC18110267 [Populus trichocarpa]
Pop_A01G059766	CUL1	AT4G02570	Leaf	Guard cell	10.1093/plcell/koaa060	cullin-1 isoform X1 [Populus trichocarpa]
Pop_A02G031346	ABP1	AT4G02980	Leaf	Guard cell	10.1093/plcell/koaa060	auxin-binding protein 1 [Populus tomentosa]
Pop_A13G031236	---	AT4G03415	Leaf	Guard cell	10.1093/plcell/koaa060	PREDICTED: probable protein phosphatase 2C 52 [Populus euphratica]
Pop_A13G031234	---	AT4G03420	Leaf	Guard cell	10.1093/plcell/koaa060	uncharacterized protein LOC7494424 [Populus trichocarpa]
Pop_A04G018424	---	AT4G04320	Leaf	Guard cell	10.1093/plcell/koaa060	malonyl-CoA decarboxylase, mitochondrial [Populus trichocarpa]
Pop_A04G018127	VPS28-2	AT4G05000	Leaf	Guard cell	10.1093/plcell/koaa060	vacuolar protein sorting-associated protein 28 homolog 1 [Populus trichocarpa]
Pop_A11G091307	SDRA	AT4G05530	Leaf	Guard cell	10.1093/plcell/koaa060	tropinone reductase-like 3 [Populus trichocarpa]
Pop_A14G029881	---	AT4G07390	Leaf	Guard cell	10.1093/plcell/koaa060	mannose-P-dolichol utilization defect 1 protein homolog 2 [Populus trichocarpa]
Pop_A01G029589	SUB1	AT4G08810	Leaf	Guard cell	10.1093/plcell/koaa060	uncharacterized protein LOC18094286 [Populus trichocarpa]
Pop_A01G075791	---	AT4G09830	Leaf	Guard cell	10.1093/plcell/koaa060	PREDICTED: uncharacterized protein LOC105142304 [Populus euphratica]
Pop_A01G059872	---	AT4G10810	Leaf	Guard cell	10.1093/plcell/koaa060	uncharacterized protein LOC7467058 [Populus trichocarpa]
Pop_A01G059863	---	AT4G10840	Leaf	Guard cell	10.1093/plcell/koaa060	PREDICTED: nephrocystin-3-like [Populus euphratica]
Pop_A01G059677	---	AT4G12230	Leaf	Guard cell	10.1093/plcell/koaa060	maspardin isoform X1 [Populus trichocarpa]
Pop_A06G062218	---	AT4G12590	Leaf	Guard cell	10.1093/plcell/koaa060	PREDICTED: ER membrane protein complex subunit 3-like [Populus euphratica]
Pop_A02G023981	---	AT4G12650	Leaf	Guard cell	10.1093/plcell/koaa060	transmembrane 9 superfamily member 12 [Populus trichocarpa]
Pop_A02G032983	STOMAGEN	AT4G12970	Leaf	Guard cell	10.1146/annurev-arplant-042811-105451	0
Pop_A02G023988	MHK	AT4G13020	Leaf	Guard cell	10.1093/plcell/koaa060	serine/threonine-protein kinase MHK isoform X2 [Populus trichocarpa]
Pop_A06G079437	---	AT4G13270	Leaf	Guard cell	10.1093/plcell/koaa060	PREDICTED: uncharacterized protein LOC105119566 [Populus euphratica]
Pop_A13G082681	---	AT4G13530	Leaf	Guard cell	10.1093/plcell/koaa060	uncharacterized protein LOC18104355 [Populus trichocarpa]
Pop_A03G080575	---	AT4G14270	Leaf	Guard cell	10.1093/plcell/koaa060	polyadenylate-binding protein-interacting protein 2 [Populus trichocarpa]
Pop_A10G047248	---	AT4G14615	Leaf	Guard cell	10.1093/plcell/koaa060	uncharacterized protein LOC7498048 [Populus trichocarpa]
Pop_A04G030655	---	AT4G15093	Leaf	Guard cell	10.1093/plcell/koaa060	extradiol ring-cleavage dioxygenase [Populus trichocarpa]
Pop_A14G045728	VAMP724	AT4G15780	Leaf	Guard cell	10.1093/plcell/koaa060	vesicle-associated membrane protein 724 [Populus trichocarpa]
Pop_A05G016832	RALFL33	AT4G15800	Leaf	Guard cell	10.1093/plcell/koaa060	rapid alkalinization factor 1 precursor [Populus trichocarpa x Populus deltoides]
Pop_A08G063848	ECHIA	AT4G16210	Leaf	Guard cell	10.1093/plcell/koaa060	0
Pop_A11G091329	---	AT4G16330	Leaf	Guard cell	10.1093/plcell/koaa060	probable 2-oxoglutarate-dependent dioxygenase At3g111800 [Populus trichocarpa]
Pop_A02G065270	---	AT4G16430	Leaf	Guard cell	10.1093/plcell/koaa060	transcription factor bHLH3 [Populus trichocarpa]
Pop_A03G050150	---	AT4G17100	Leaf	Guard cell	10.1093/plcell/koaa060	PREDICTED: poly(U)-specific endoribonuclease-B [Populus euphratica]
Pop_A01G003986	G3Pp4	AT4G17550	Leaf	Guard cell	10.1093/plcell/koaa060	putative glycerol-3-phosphate transporter 4 [Populus trichocarpa]
Pop_A01G003996	GATA26	AT4G17570	Leaf	Guard cell	10.1093/plcell/koaa060	hypothetical protein POPTR_001G151700 [Populus trichocarpa]
Pop_A01G004065	PRR2	AT4G18020	Leaf	Guard cell	10.1093/plcell/koaa060	two-component response regulator-like APRR2 isoform X1 [Populus trichocarpa]
Pop_A04G029349	TCP2	AT4G18390	Leaf	Guard cell	10.1093/plcell/koaa060	transcription factor TCP2-like [Populus tomentosa]
Pop_A04G026015	WL4	AT4G18700	Leaf	Guard cell	10.1093/plcell/koaa060	CBL-interacting serine/threonine-protein kinase 12 [Populus trichocarpa]
Pop_A04G026004	UCU1	AT4G18710	Leaf	Guard cell	10.1199/tab.0162	shaggy-related protein kinase eta [Populus trichocarpa]
Pop_A04G030853	RABA1d	AT4G18800	Leaf	Guard cell	10.1093/plcell/koaa060	PREDICTED: ras-related protein RABA1d [Populus euphratica]
Pop_A04G018440	OFP5	AT4G18830	Leaf	Guard cell	10.1093/plcell/koaa060	probable transcription repressor OFP9 [Populus trichocarpa]
Pop_A01G032169	---	AT4G18930	Leaf	Guard cell	10.1093/plcell/koaa060	cyclic phosphodiesterase [Populus trichocarpa]
Pop_A04G029333	---	AT4G18950	Leaf	Guard cell	10.1038/srep45586	integrin-linked protein kinase 1 isoform X2 [Populus trichocarpa]
Pop_A04G010826	---	AT4G19420	Leaf	Guard cell	10.1093/plcell/koaa060	0
Pop_A01G024864	GSNAP	AT4G20410	Leaf	Guard cell	10.1093/plcell/koaa060	gamma-soluble NSF attachment protein [Populus trichocarpa]
Pop_A01G017584	GA2OX8	AT4G21200	Leaf	Guard cell	10.1016/j.plantsci.2019.04.023	gibberellin 2-beta-dioxygenase 8 [Populus trichocarpa]
Pop_A01G015503	---	AT4G21740	Leaf	Guard cell	10.1093/plcell/koaa060	unknown [Populus trichocarpa]
Pop_A01G004567	---	AT4G22580	Leaf	Guard cell	10.1093/plcell/koaa060	probable xyloglucan galactosyltransferase GT19 [Populus trichocarpa]
Pop_A12G007861	---	AT4G22820	Leaf	Guard cell	10.1093/plcell/koaa060	zinc finger A20 and AN1 domain-containing stress-associated protein 7 [Populus trichocarpa]
Pop_A05G073123	ATR1	AT4G24520	Leaf	Guard cell	10.1093/plcell/koaa060	NADPH--cytochrome P450 reductase-like isoform X1 [Populus trichocarpa]
Pop_G02G065967	---	AT4G24550	Leaf	Guard cell	10.1093/plcell/koaa060	PREDICTED: AP-4 complex subunit mu isoform X1 [Populus euphratica]
Pop_A12G067961	ATGP4	AT4G24990	Leaf	Guard cell	10.1093/plcell/koaa060	membrane-anchored ubiquitin-fold protein 3 [Populus trichocarpa]
Pop_A12G008022	---	AT4G25620	Leaf	Guard cell	10.1093/plcell/koaa060	PREDICTED: uncharacterized protein LOC105129679 [Populus euphratica]
Pop_A04G029227	---	AT4G25680	Leaf	Guard cell	10.1093/plcell/koaa060	uncharacterized protein LOC7487423 [Populus trichocarpa]
Pop_UnG036814	PSD3	AT4G25970	Leaf	Guard cell	10.1093/plcell/koaa060	phosphatidylserine decarboxylase proenzyme 3 isoform X1 [Populus trichocarpa]
Pop_A07G036471	---	AT4G27130	Leaf	Guard cell	10.1093/plcell/koaa060	protein translation factor SUI1 homolog [Populus trichocarpa]
Pop_A01G074953	---	AT4G27450	Leaf	Guard cell	10.1093/plcell/koaa060	PREDICTED: stem-specific protein TSJT1-like [Populus euphratica]
Pop_A01G074983	PPI1	AT4G27500	Leaf	Guard cell	10.1093/plcell/koaa060	PREDICTED: proton pump-interactor 1 [Populus euphratica]
Pop_A12G081624	---	AT4G27740	Leaf	Guard cell	10.1093/plcell/koaa060	hypothetical protein POPTR_012G019200 [Populus trichocarpa]
Pop_A01G059890	---	AT4G27745	Leaf	Guard cell	10.1093/plcell/koaa060	protein yippee-like At4g27745 [Populus trichocarpa]
Pop_A15G076669	ACBP2	AT4G27780	Leaf	Guard cell	10.1093/plcell/koaa060	acyl-CoA-binding domain-containing protein 1 [Populus trichocarpa]
Pop_A13G032391	---	AT4G28260	Leaf	Guard cell	10.1093/plcell/koaa060	PREDICTED: uncharacterized protein LOC105134555 [Populus euphratica]
Pop_A02G033026	---	AT4G28570	Leaf	Guard cell	10.1093/plcell/koaa060	PREDICTED: LOW QUALITY PROTEIN: long-chain-alcohol oxidase FAO2 [Populus euphratica]
Pop_A06G053729	OZF2	AT4G29190	Leaf	Guard cell	10.1093/plcell/koaa060	zinc finger CCCH domain-containing protein 20 [Populus trichocarpa]
Pop_A18G089896	---	AT4G30660	Leaf	Guard cell	10.1093/plcell/koaa060	hypothetical protein POPTR_018G105000 [Populus trichocarpa]
Pop_A06G062920	---	AT4G31080	Leaf	Guard cell	10.1093/plcell/koaa060	uncharacterized protein At2g24330 isoform X2 [Populus trichocarpa]
Pop_A06G062953	---	AT4G31130	Leaf	Guard cell	10.1093/plcell/koaa060	uncharacterized protein LOC18100811 [Populus trichocarpa]
Pop_A06G061535	---	AT4G31340	Leaf	Guard cell	10.1093/plcell/koaa060	hypothetical protein POPTR_006G076700 [Populus trichocarpa]
Pop_A06G063025	---	AT4G31420	Leaf	Guard cell	10.1093/plcell/koaa060	cytoplasmic 60S subunit biogenesis factor REI1 homolog 1 [Populus trichocarpa]
Pop_A18G013157	---	AT4G31480	Leaf	Guard cell	10.1093/plcell/koaa060	coatomer subunit beta-1 [Populus trichocarpa]
Pop_A04G026371	GDU1	AT4G31730	Leaf	Guard cell	10.1093/plcell/koaa060	hypothetical protein POPTR_T017000 [Populus trichocarpa]
Pop_A06G061648	---	AT4G32285	Leaf	Guard cell	10.1093/plcell/koaa060	probable clathrin assembly protein At4g32285 [Populus trichocarpa]
Pop_A04G018520	---	AT4G32480	Leaf	Guard cell	10.1093/plcell/koaa060	uncharacterized protein LOC7477401 [Populus trichocarpa]
Pop_A06G063067	---	AT4G32530	Leaf	Guard cell	10.1093/plcell/koaa060	V-type proton ATPase subunit c''2 [Populus trichocarpa]
Pop_A06G053759	GAMMAVPE	AT4G32940	Leaf	Guard cell	10.1093/plcell/koaa060	vacuolar processing enzyme a [Populus tomentosa]
Pop_A01G010280	---	AT4G33910	Leaf	Guard cell	10.1093/plcell/koaa060	probable prolyl 4-hydroxylase 9 isoform X2 [Populus trichocarpa]
Pop_A03G050135	SRK2E	AT4G33950	Leaf	Guard cell	10.1093/plcell/koaa060	serine/threonine-protein kinase SAPK3 [Populus trichocarpa]
Pop_A04G030618	DPBF5	AT4G34000	Leaf	Guard cell	10.1093/plcell/koaa060	ABSCISIC ACID-INSENSITIVE 5-like protein 7 isoform X1 [Populus trichocarpa]
Pop_A01G010236	---	AT4G34215	Leaf	Guard cell	10.1093/plcell/koaa060	PREDICTED: probable carbohydrate esterase At4g34215 isoform X1 [Populus euphratica]
Pop_A04G070774	---	AT4G34450	Leaf	Guard cell	10.1093/plcell/koaa060	PREDICTED: uncharacterized protein LOC105109103 [Populus euphratica]
Pop_A04G028312	CAP1	AT4G34490	Leaf	Guard cell	10.1093/plcell/koaa060	PREDICTED: cyclase-associated protein 1-like [Populus euphratica]
Pop_A02G004983	---	AT4G35070	Leaf	Guard cell	10.1093/plcell/koaa060	PREDICTED: probable BOI-related E3 ubiquitin-protein ligase 2 [Populus euphratica]
Pop_A01G004087	PIRL4	AT4G35470	Leaf	Guard cell	10.1093/plcell/koaa060	plant intracellular Ras-group-related LRR protein 5 isoform X2 [Populus trichocarpa]
Pop_A02G005041	---	AT4G35750	Leaf	Guard cell	10.1093/plcell/koaa060	ganglioside-induced differentiation-associated protein 2 [Populus trichocarpa]
Pop_A09G076701	GB2	AT4G35860	Leaf	Guard cell	10.1093/plcell/koaa060	ras-related protein RABB1b [Populus trichocarpa]
Pop_A07G022655	---	AT4G36195	Leaf	Guard cell	10.1093/plcell/koaa060	PREDICTED: probable serine protease EDA2 [Populus euphratica]
Pop_A07G022497	ATAPP1	AT4G36760	Leaf	Guard cell	10.1093/plcell/koaa060	PREDICTED: probable Xaa-Pro aminopeptidase P [Populus euphratica]
Pop_A02G066353	HAT22	AT4G37790	Leaf	Guard cell	10.1093/plcell/koaa060	homeobox-leucine zipper protein HAT22 [Populus trichocarpa]
Pop_A02G005577	PEPCK	AT4G37870	Leaf	Guard cell	10.1093/plcell/koaa060	phosphoenolpyruvate carboxykinase (ATP) [Populus trichocarpa]
Pop_A04G028383	---	AT4G38900	Leaf	Guard cell	10.1093/plcell/koaa060	transcription factor RF2a [Populus trichocarpa]
Pop_A05G071977	---	AT4G39900	Leaf	Guard cell	10.1093/plcell/koaa060	hypothetical protein POPTR_005G075200 [Populus trichocarpa]
Pop_A05G071993	---	AT4G39955	Leaf	Guard cell	10.1093/plcell/koaa060	PREDICTED: monoacylglycerol lipase ABHD6-like isoform X1 [Populus euphratica]
Pop_A09G028827	---	AT5G02280	Leaf	Guard cell	10.1093/plcell/koaa060	trafficking protein particle complex subunit 4 [Populus trichocarpa]
Pop_A06G061455	---	AT5G02460	Leaf	Guard cell	10.1093/plcell/koaa060	dof zinc finger protein DOF5.1 [Populus trichocarpa]
Pop_A06G085759	---	AT5G03460	Leaf	Guard cell	10.1093/plcell/koaa060	uncharacterized protein LOC18100138 isoform X1 [Populus trichocarpa]
Pop_A06G061987	---	AT5G05110	Leaf	Guard cell	10.1093/plcell/koaa060	hypothetical protein [Populus tomentosa];PREDICTED: cysteine proteinase inhibitor-like isoform X1 [Populus euphratica]
Pop_A10G047059	MEE60	AT5G05950	Leaf	Guard cell	10.1093/plcell/koaa060	PREDICTED: uncharacterized protein LOC105133655 [Populus euphratica]
Pop_A06G053490	SNX1	AT5G06140	Leaf	Guard cell	10.1093/plcell/koaa060	PREDICTED: sorting nexin 1 [Populus euphratica]
Pop_A06G053699	---	AT5G06790	Leaf	Guard cell	10.1093/plcell/koaa060	uncharacterized protein LOC7479534 [Populus trichocarpa]
Pop_A01G054807	---	AT5G06800	Leaf	Guard cell	10.1093/plcell/koaa060	myb family transcription factor PHL5 isoform X1 [Populus trichocarpa]
Pop_A12G068177	Tudor1	AT5G07350	Leaf	Guard cell	10.1093/plcell/koaa060	PREDICTED: staphylococcal nuclease domain-containing protein 1-like [Populus euphratica]
Pop_A12G019310	BIM1	AT5G08130	Leaf	Guard cell	10.1093/plcell/koaa060	transcription factor BIM1 isoform X2 [Populus trichocarpa];transcription factor BIM1 isoform X1 [Populus trichocarpa]
Pop_A12G073884	PK3	AT5G08160	Leaf	Guard cell	10.1093/plcell/koaa060	serine/threonine-protein kinase 16 [Populus trichocarpa]
Pop_A04G026344	---	AT5G10730	Leaf	Guard cell	10.1093/plcell/koaa060	uncharacterized protein At1g32220, chloroplastic [Populus trichocarpa]
Pop_A06G063229	TED 5	AT5G11260	Leaf	Guard cell	10.1093/plcell/koaa060	transcription factor HY5 [Populus trichocarpa]
Pop_A18G012885	CYCA2;2	AT5G11300	Leaf	Guard cell	10.1146/annurev-arplant-042811-105451	PREDICTED: cyclin-A2-2-like isoform X1 [Populus euphratica]
Pop_A06G063126	---	AT5G11490	Leaf	Guard cell	10.1093/plcell/koaa060	beta-adaptin-like protein A [Populus trichocarpa]
Pop_A02G004943	---	AT5G11600	Leaf	Guard cell	10.1093/plcell/koaa060	0
Pop_A01G074726	---	AT5G11680	Leaf	Guard cell	10.1093/plcell/koaa060	PREDICTED: uncharacterized protein LOC105110833 [Populus euphratica]
Pop_A03G049655	---	AT5G11970	Leaf	Guard cell	10.1093/plcell/koaa060	uncharacterized protein LOC7478174 [Populus trichocarpa]
Pop_A01G067196	PYD2	AT5G12200	Leaf	Guard cell	10.1093/plcell/koaa060	PREDICTED: dihydropyrimidinase [Populus euphratica]
Pop_A01G079838	---	AT5G13810	Leaf	Guard cell	10.1093/plcell/koaa060	uncharacterized protein At5g39865 [Populus trichocarpa]
Pop_A01G058709	---	AT5G14390	Leaf	Guard cell	10.1093/plcell/koaa060	PREDICTED: alpha/beta hydrolase domain-containing protein 17B [Populus euphratica]
Pop_A01G002208	RGLG2	AT5G14420	Leaf	Guard cell	10.1093/plcell/koaa060	E3 ubiquitin-protein ligase RGLG2 [Populus trichocarpa]
Pop_G01G058650	---	AT5G14720	Leaf	Guard cell	10.1093/plcell/koaa060	serine/threonine-protein kinase BLUS1 isoform X1 [Populus trichocarpa]
Pop_A03G049931	WER1	AT5G14750	Leaf	Guard cell	10.1199/tab.0162	PREDICTED: transcription factor MYB114-like [Populus euphratica]
Pop_A01G059051	---	AT5G14920	Leaf	Guard cell	10.1093/plcell/koaa060	PREDICTED: gibberellin-regulated protein 14-like [Populus euphratica]
Pop_A19G053017	AAE5	AT5G16370	Leaf	Guard cell	10.1093/plcell/koaa060	probable acyl-activating enzyme 5, peroxisomal [Populus trichocarpa]
Pop_A19G052838	RGP5	AT5G16510	Leaf	Guard cell	10.1093/plcell/koaa060	probable UDP-arabinopyranose mutase 5 [Populus trichocarpa]
Pop_A04G029255	---	AT5G16550	Leaf	Guard cell	10.1093/plcell/koaa060	PREDICTED: uncharacterized protein LOC105139223 [Populus euphratica]
Pop_A13G010003	---	AT5G16730	Leaf	Guard cell	10.1093/plcell/koaa060	WEB family protein At3g02930, chloroplastic [Populus trichocarpa]
Pop_A08G086441	---	AT5G17190	Leaf	Guard cell	10.1093/plcell/koaa060	uncharacterized protein LOC7457795 [Populus trichocarpa]
Pop_A08G009144	---	AT5G18500	Leaf	Guard cell	10.1093/plcell/koaa060	hypothetical protein [Populus tomentosa]
Pop_A08G045790	---	AT5G18850	Leaf	Guard cell	10.1093/plcell/koaa060	uncharacterized protein LOC7473264 [Populus trichocarpa]
Pop_A08G045787	---	AT5G18900	Leaf	Guard cell	10.1093/plcell/koaa060	probable prolyl 4-hydroxylase 4 [Populus trichocarpa]
Pop_A06G061730	TIP1	AT5G20350	Leaf	Guard cell	10.1093/plcell/koaa060	protein S-acyltransferase 24-like [Populus tomentosa]
Pop_A06G061653	---	AT5G20400	Leaf	Guard cell	10.1093/plcell/koaa060	0
Pop_A06G079321	WAV2	AT5G20520	Leaf	Guard cell	10.1093/plcell/koaa060	protein bem46 isoform X1 [Populus trichocarpa];protein bem46 isoform X2 [Populus trichocarpa]
Pop_A06G053389	COPT5	AT5G20650	Leaf	Guard cell	10.1093/plcell/koaa060	PREDICTED: copper transporter 5.1-like [Populus euphratica]
Pop_A06G053412	---	AT5G20885	Leaf	Guard cell	10.1093/plcell/koaa060	unknown [Populus trichocarpa]
Pop_A04G059369	---	AT5G21070	Leaf	Guard cell	10.1093/plcell/koaa060	uncharacterized protein LOC18098065 [Populus trichocarpa]
Pop_A01G054531	---	AT5G21105	Leaf	Guard cell	10.1093/plcell/koaa060	L-ascorbate oxidase [Populus trichocarpa]
Pop_A02G012240	---	AT5G23850	Leaf	Guard cell	10.1093/plcell/koaa060	O-glucosyltransferase rumi homolog [Prunus yedoensis var. nudiflora]
Pop_A01G059658	TUB8	AT5G23860	Leaf	Guard cell	10.1093/plcell/koaa060	beta-tubulin 3 [Salix arbutifolia]
Pop_A12G067090	URM23	AT5G24520	Leaf	Guard cell	10.1199/tab.0162	protein TRANSPARENT TESTA GLABRA 1 [Populus trichocarpa]
Pop_A06G062943	---	AT5G25170	Leaf	Guard cell	10.1093/plcell/koaa060	deSI-like protein At4g17486 [Populus trichocarpa]
Pop_A06G063083	CYCA2;1	AT5G25380	Leaf	Guard cell	10.1146/annurev-arplant-042811-105451	cyclin-A2-2 [Populus trichocarpa]
Pop_A05G071651	GATA12	AT5G25830	Leaf	Guard cell	10.1093/plcell/koaa060	hypothetical protein POPTR_005G066100 [Populus trichocarpa]
Pop_A05G016914	---	AT5G26600	Leaf	Guard cell	10.1093/plcell/koaa060	probable L-cysteine desulfhydrase, chloroplastic [Populus trichocarpa]
Pop_A05G016935	---	AT5G26731	Leaf	Guard cell	10.1093/plcell/koaa060	hypothetical protein POPTR_005G000700 [Populus trichocarpa]
Pop_A02G012563	SK 11	AT5G26751	Leaf	Guard cell	10.1093/plcell/koaa060	shaggy-related protein kinase alpha [Populus trichocarpa]
Pop_A05G016953	---	AT5G27830	Leaf	Guard cell	10.1093/plcell/koaa060	hypothetical protein POPTR_005G024200 [Populus trichocarpa]
Pop_A05G016979	---	AT5G27930	Leaf	Guard cell	10.1093/plcell/koaa060	unknown [Populus trichocarpa]
Pop_A01G067221	---	AT5G28040	Leaf	Guard cell	10.1093/plcell/koaa060	probable transcription factor At3g04930 [Populus trichocarpa]
Pop_A09G076719	OBO2	AT5G28490	Leaf	Guard cell	10.1093/plcell/koaa060	protein LIGHT-DEPENDENT SHORT HYPOCOTYLS 1 [Populus trichocarpa]
Pop_A06G061659	---	AT5G32440	Leaf	Guard cell	10.1093/plcell/koaa060	uncharacterized protein LOC7474679 [Populus trichocarpa]
Pop_A06G053719	---	AT5G35160	Leaf	Guard cell	10.1093/plcell/koaa060	transmembrane 9 superfamily member 11 [Populus trichocarpa]
Pop_A06G061668	---	AT5G35200	Leaf	Guard cell	10.1093/plcell/koaa060	putative clathrin assembly protein At5g35200 isoform X2 [Populus trichocarpa]
Pop_A13G074168	---	AT5G36290	Leaf	Guard cell	10.1093/plcell/koaa060	PREDICTED: GDT1-like protein 4 [Populus euphratica]
Pop_A04G029303	PDLP7	AT5G37660	Leaf	Guard cell	10.1093/plcell/koaa060	cysteine-rich repeat secretory protein 60 isoform X2 [Populus trichocarpa]
Pop_A04G026523	---	AT5G38220	Leaf	Guard cell	10.1093/plcell/koaa060	PREDICTED: alpha/beta hydrolase domain-containing protein 17B-like [Populus euphratica]
Pop_A04G026452	ZIG1	AT5G39510	Leaf	Guard cell	10.1093/plcell/koaa060	PREDICTED: vesicle transport v-SNARE 13-like [Populus euphratica]
Pop_A04G034225	---	AT5G39570	Leaf	Guard cell	10.1093/plcell/koaa060	latex abundant protein 1 [Populus tomentosa]
Pop_A05G001962	---	AT5G39590	Leaf	Guard cell	10.1093/plcell/koaa060	uncharacterized protein LOC7477657 [Populus trichocarpa]
Pop_A06G053488	---	AT5G39850	Leaf	Guard cell	10.1093/plcell/koaa060	40S ribosomal protein S9-2 [Populus trichocarpa]
Pop_A01G059704	---	AT5G41350	Leaf	Guard cell	10.1093/plcell/koaa060	hypothetical protein POPTR_001G101700 [Populus trichocarpa]
Pop_A01G059739	---	AT5G41560	Leaf	Guard cell	10.1093/plcell/koaa060	DET1- and DDB1-associated protein 1 [Populus trichocarpa]
Pop_A01G059916	---	AT5G42090	Leaf	Guard cell	10.1093/plcell/koaa060	protein GPR107 [Populus trichocarpa]
Pop_A02G005008	---	AT5G42200	Leaf	Guard cell	10.1093/plcell/koaa060	hypothetical protein POPTR_002G017400 [Populus trichocarpa]
Pop_A02G066178	---	AT5G42680	Leaf	Guard cell	10.1093/plcell/koaa060	protein MIZU-KUSSEI 1 [Populus trichocarpa]
Pop_A02G066174	---	AT5G42690	Leaf	Guard cell	10.1093/plcell/koaa060	PREDICTED: uncharacterized protein LOC105117178 [Populus euphratica]
Pop_A02G033075	FUS8	AT5G42970	Leaf	Guard cell	10.1093/plcell/koaa060	COP9 signalosome complex subunit 4 [Populus trichocarpa]
Pop_A14G029889	---	AT5G43020	Leaf	Guard cell	10.1093/plcell/koaa060	PREDICTED: probable inactive receptor kinase At5g67200 [Populus euphratica]
Pop_A05G073437	---	AT5G43100	Leaf	Guard cell	10.1093/plcell/koaa060	aspartic proteinase nepenthesin-1 [Populus trichocarpa]
Pop_A11G091401	---	AT5G46250	Leaf	Guard cell	10.1093/plcell/koaa060	PREDICTED: la-related protein 6A [Populus euphratica]
Pop_A02G023970	OBE2	AT5G48160	Leaf	Guard cell	10.1093/plcell/koaa060	OBERON-like protein [Populus trichocarpa]
Pop_A02G024035	---	AT5G48385	Leaf	Guard cell	10.1093/plcell/koaa060	FRIGIDA-like protein 3 [Populus trichocarpa]
Pop_A02G032973	DIR1	AT5G48485	Leaf	Guard cell	10.1093/plcell/koaa060	putative lipid-transfer protein DIR1 [Populus trichocarpa]
Pop_A02G066336	XK2	AT5G49650	Leaf	Guard cell	10.1093/plcell/koaa060	Ribulokinase [Parasponia andersonii]
Pop_A03G091446	CLC-C	AT5G49890	Leaf	Guard cell	10.1093/plcell/koaa060	chloride channel protein CLC-c-like [Populus trichocarpa]
Pop_A12G019269	---	AT5G50000	Leaf	Guard cell	10.1093/plcell/koaa060	serine/threonine-protein kinase STY13 [Populus trichocarpa]
Pop_A12G019251	---	AT5G50090	Leaf	Guard cell	10.1093/plcell/koaa060	uncharacterized protein LOC7483478 [Populus trichocarpa]
Pop_A12G007848	---	AT5G51570	Leaf	Guard cell	10.1093/plcell/koaa060	hypersensitive-induced response protein 4 [Populus trichocarpa]
Pop_A12G007933	PP2-A14	AT5G52120	Leaf	Guard cell	10.1093/plcell/koaa060	F-box protein PP2-A14 [Populus trichocarpa]
Pop_A12G007957	GB1	AT5G52210	Leaf	Guard cell	10.1093/plcell/koaa060	ADP-ribosylation factor-related protein 1 [Populus trichocarpa]
Pop_A03G050242	---	AT5G52980	Leaf	Guard cell	10.1093/plcell/koaa060	uncharacterized protein LOC7491866 [Populus trichocarpa]
Pop_A02G023973	---	AT5G53480	Leaf	Guard cell	10.1093/plcell/koaa060	PREDICTED: importin subunit beta-1-like [Populus euphratica]
Pop_A01G081130	ENODL1	AT5G53870	Leaf	Guard cell	10.1093/plcell/koaa060	early nodulin-like protein 2 [Populus trichocarpa]
Pop_A01G081141	---	AT5G53880	Leaf	Guard cell	10.1093/plcell/koaa060	unknown [Populus trichocarpa]
Pop_A01G015480	HGO	AT5G54080	Leaf	Guard cell	10.1093/plcell/koaa060	PREDICTED: homogentisate 1,2-dioxygenase-like [Populus euphratica]
Pop_A01G036598	---	AT5G54530	Leaf	Guard cell	10.1093/plcell/koaa060	uncharacterized protein LOC18095867 isoform X2 [Populus trichocarpa]
Pop_A01G069903	SGP1	AT5G54840	Leaf	Guard cell	10.1387/ijdb.072488mb	septum-promoting GTP-binding protein 1 isoform X1 [Populus trichocarpa]
Pop_A01G058811	MAP65-1	AT5G55230	Leaf	Guard cell	10.1093/plcell/koaa060	65-kDa microtubule-associated protein 1 [Populus trichocarpa]
Pop_A11G021672	---	AT5G55290	Leaf	Guard cell	10.1093/plcell/koaa060	0
Pop_A01G075804	PSL4	AT5G56360	Leaf	Guard cell	10.1093/plcell/koaa060	glucosidase 2 subunit beta [Populus trichocarpa]
Pop_A06G064739	SnRK3.4	AT5G57630	Leaf	Guard cell	10.1093/plcell/koaa060	PREDICTED: CBL-interacting serine/threonine-protein kinase 21-like [Populus euphratica]
Pop_A18G089897	SKIP1	AT5G57900	Leaf	Guard cell	10.1093/plcell/koaa060	PREDICTED: F-box protein SKIP1 [Populus euphratica]
Pop_A01G005871	---	AT5G58575	Leaf	Guard cell	10.1093/plcell/koaa060	ataxin-7-like protein 3 [Populus trichocarpa]
Pop_A09G029075	RANBP1	AT5G58590	Leaf	Guard cell	10.1093/plcell/koaa060	ran-binding protein 1 homolog a [Populus trichocarpa]
Pop_A01G056928	COPT1	AT5G59030	Leaf	Guard cell	10.1093/plcell/koaa060	PREDICTED: copper transporter 1-like [Populus euphratica]
Pop_A09G014514	---	AT5G59050	Leaf	Guard cell	10.1093/plcell/koaa060	uncharacterized protein LOC7481512 [Populus trichocarpa]
Pop_A01G056922	---	AT5G59210	Leaf	Guard cell	10.1093/plcell/koaa060	peroxisomal and mitochondrial division factor 2 [Populus trichocarpa]
Pop_A01G054759	---	AT5G59960	Leaf	Guard cell	10.1093/plcell/koaa060	uncharacterized protein LOC7485719 isoform X1 [Populus trichocarpa]
Pop_A13G009991	---	AT5G60570	Leaf	Guard cell	10.1093/plcell/koaa060	F-box/kelch-repeat protein At5g60570 isoform X1 [Populus trichocarpa]
Pop_A06G062077	---	AT5G60580	Leaf	Guard cell	10.1093/plcell/koaa060	uncharacterized protein LOC7495647 [Populus trichocarpa]
Pop_A04G070671	GPAT9	AT5G60620	Leaf	Guard cell	10.1093/plcell/koaa060	glycerol-3-phosphate acyltransferase 9 isoform X1 [Populus trichocarpa]
Pop_A09G083623	PDIL1-4	AT5G60640	Leaf	Guard cell	10.1093/plcell/koaa060	protein disulfide isomerase-like 1-4 [Populus trichocarpa]
Pop_A09G083661	---	AT5G60710	Leaf	Guard cell	10.1093/plcell/koaa060	uncharacterized protein LOC112328650 [Populus trichocarpa]
Pop_A12G019360	---	AT5G60840	Leaf	Guard cell	10.1093/plcell/koaa060	hypothetical protein POPTR_012G065400, partial [Populus trichocarpa]
Pop_A04G018086	OBP4	AT5G60850	Leaf	Guard cell	10.1093/plcell/koaa060	PREDICTED: dof zinc finger protein DOF4.6-like [Populus euphratica]
Pop_A01G015481	RABA1f	AT5G60860	Leaf	Guard cell	10.1093/plcell/koaa060	ras-related protein RABA1f [Populus trichocarpa]
Pop_A12G068113	PMSR1	AT5G61640	Leaf	Guard cell	10.1093/plcell/koaa060	peptide methionine sulfoxide reductase [Populus trichocarpa]
Pop_A01G027309	---	AT5G62200	Leaf	Guard cell	10.1093/plcell/koaa060	embryo-specific protein ATS3B [Populus trichocarpa]
Pop_A12G007863	ERL1	AT5G62230	Leaf	Guard cell	10.1126/science.1109710	LRR receptor-like serine/threonine-protein kinase ERL1 [Populus trichocarpa]
Pop_A12G007863	ERL1	AT5G62230	Leaf	Guard cell	10.1146/annurev-arplant-042811-105451	LRR receptor-like serine/threonine-protein kinase ERL1 [Populus trichocarpa]
Pop_A12G007826	---	AT5G62350	Leaf	Guard cell	10.1093/plcell/koaa060	PREDICTED: 21 kDa protein-like [Populus euphratica]
Pop_A12G019294	---	AT5G62930	Leaf	Guard cell	10.1093/plcell/koaa060	PREDICTED: GDSL esterase/lipase At5g62930 [Populus euphratica]
Pop_A12G068101	---	AT5G63190	Leaf	Guard cell	10.1093/plcell/koaa060	uncharacterized protein LOC7484443 [Populus trichocarpa]
Pop_A04G030630	---	AT5G63640	Leaf	Guard cell	10.1093/plcell/koaa060	TOM1-like protein 5 isoform X1 [Populus trichocarpa]
Pop_A07G006586	UVR8	AT5G63860	Leaf	Guard cell	10.1093/plcell/koaa060	ultraviolet-B receptor UVR8 isoform X2 [Populus trichocarpa]
Pop_A01G054656	---	AT5G64090	Leaf	Guard cell	10.1093/plcell/koaa060	A-agglutinin anchorage subunit [Populus trichocarpa]
Pop_A12G081585	---	AT5G64180	Leaf	Guard cell	10.1093/plcell/koaa060	hypothetical protein POPTR_012G022200 [Populus trichocarpa]
Pop_A07G070515	PYD3	AT5G64370	Leaf	Guard cell	10.1093/plcell/koaa060	beta-ureidopropionase [Populus trichocarpa]
Pop_A01G005981	FAAH	AT5G64440	Leaf	Guard cell	10.1093/plcell/koaa060	fatty acid amide hydrolase isoform X1 [Populus trichocarpa]
Pop_A05G073620	---	AT5G64880	Leaf	Guard cell	10.1093/plcell/koaa060	PREDICTED: uncharacterized protein LOC105123867 isoform X1 [Populus euphratica]
Pop_A05G073201	---	AT5G65590	Leaf	Guard cell	10.1093/plcell/koaa060	Dof-type zinc finger DNA-binding family protein [Populus tomentosa]
Pop_A02G005570	---	AT5G65660	Leaf	Guard cell	10.1093/plcell/koaa060	uncharacterized protein At5g65660 [Populus trichocarpa]
Pop_A08G063718	---	AT5G65750	Leaf	Guard cell	10.1093/plcell/koaa060	2-oxoglutarate dehydrogenase, mitochondrial [Populus trichocarpa]
Pop_A02G012433	---	AT5G65960	Leaf	Guard cell	10.1093/plcell/koaa060	uncharacterized protein LOC7487284 [Populus trichocarpa]
Pop_A05G073242	---	AT5G66050	Leaf	Guard cell	10.1093/plcell/koaa060	bifunctional nuclease 2 [Populus trichocarpa];hypothetical protein POPTR_005G105900 [Populus trichocarpa]
Pop_A02G005107	---	AT5G66440	Leaf	Guard cell	10.1093/plcell/koaa060	uncharacterized protein LOC7479730 [Populus trichocarpa]
Pop_A05G072936	RALFL34	AT5G67070	Leaf	Guard cell	10.1093/plcell/koaa060	protein RALF-like 34 [Populus trichocarpa]
Pop_A05G072905	CYCD3;2	AT5G67260	Leaf	Guard cell	10.1093/jxb/eru139	cyclin D [Populus alba]
Pop_A08G063732	CLE9	AT1G26600	Leaf	Guard mother cell	10.1016/j.devcel.2018.08.007	hypothetical protein POPTR_008G093500 [Populus trichocarpa]
Pop_A08G012026	MYB88	AT2G02820	Leaf	Guard mother cell	10.1146/annurev-arplant-042811-105451	PREDICTED: uncharacterized protein LOC105126660 isoform X1 [Populus euphratica]
Pop_A01G059731	MPK6	AT2G43790	Leaf	Guard mother cell	10.1146/annurev-arplant-042811-105451	PREDICTED: mitogen-activated protein kinase homolog MMK2-like [Populus euphratica]
Pop_A01G059813	RBR1	AT3G12280	Leaf	Guard mother cell	10.7554/eLife.03271	PREDICTED: retinoblastoma-related protein isoform X1 [Populus euphratica]
Pop_A01G010392	FMA	AT3G24140	Leaf	Guard mother cell	10.2307/20076803	PREDICTED: transcription factor FAMA isoform X2 [Populus euphratica];transcription factor FAMA isoform X1 [Populus trichocarpa]
Pop_A04G030676	CDKA;1	AT3G48750	Leaf	Guard mother cell	10.1093/jxb/eru139	cell division control protein 2 homolog A [Populus trichocarpa]
Pop_A06G061410	CYCD7;1	AT5G02110	Leaf	Guard mother cell	10.1242/dev.160671	D7-type cyclin [Populus trichocarpa]
Pop_A12G007863	ERL1	AT5G62230	Leaf	Guard mother cell	10.1126/science.1109710	LRR receptor-like serine/threonine-protein kinase ERL1 [Populus trichocarpa]
Pop_A02G012263	SPPL4	AT1G01650	Leaf	Hydathode cell	10.1093/plcell/koaa060	signal peptide peptidase-like 4 isoform X1 [Populus trichocarpa]
Pop_A02G031349	GSTF6	AT1G02930	Leaf	Hydathode cell	10.1093/plcell/koaa060	glutathione S-transferase F4 [Populus yatungensis]
Pop_A02G023919	EFE	AT1G05010	Leaf	Hydathode cell	10.1093/plcell/koaa060	1-aminocyclopropane-1-carboxylate oxidase [Populus trichocarpa]
Pop_A10G069364	---	AT1G13990	Leaf	Hydathode cell	10.1093/plcell/koaa060	uncharacterized protein LOC7492916 [Populus trichocarpa]
Pop_A12G073814	---	AT1G18210	Leaf	Hydathode cell	10.1093/plcell/koaa060	probable calcium-binding protein CML27 [Populus trichocarpa]
Pop_A02G065616	---	AT1G21380	Leaf	Hydathode cell	10.1093/plcell/koaa060	TOM1-like protein 3 isoform X1 [Populus trichocarpa]
Pop_A11G056715	ERD2	AT1G29330	Leaf	Hydathode cell	10.1093/plcell/koaa060	ER lumen protein-retaining receptor A [Populus trichocarpa];PREDICTED: ER lumen protein-retaining receptor A [Populus euphratica]
Pop_A02G088594	---	AT1G34750	Leaf	Hydathode cell	10.1093/plcell/koaa060	probable protein phosphatase 2C 9 [Populus trichocarpa]
Pop_A01G004491	---	AT1G52720	Leaf	Hydathode cell	10.1093/plcell/koaa060	uncharacterized protein LOC7478123 [Populus trichocarpa]
Pop_A01G003825	ALDH7B4	AT1G54100	Leaf	Hydathode cell	10.1093/plcell/koaa060	PREDICTED: aldehyde dehydrogenase family 7 member B4 isoform X1 [Populus euphratica]
Pop_A12G073749	---	AT1G73480	Leaf	Hydathode cell	10.1093/plcell/koaa060	PREDICTED: monoglyceride lipase-like isoform X2 [Populus euphratica]
Pop_A05G071845	---	AT1G73920	Leaf	Hydathode cell	10.1093/plcell/koaa060	hypothetical protein POPTR_005G048600 [Populus trichocarpa]
Pop_A10G069483	MCP2d	AT1G79340	Leaf	Hydathode cell	10.1093/plcell/koaa060	metacaspase-4 [Populus trichocarpa]
Pop_A04G002715	OPR3	AT2G06050	Leaf	Hydathode cell	10.1093/plcell/koaa060	artemisinic aldehyde Delta(11(13)) reductase isoform X3 [Populus trichocarpa]
Pop_A04G002598	Kin3	AT2G17220	Leaf	Hydathode cell	10.1093/plcell/koaa060	PREDICTED: probable serine/threonine-protein kinase Cx32, chloroplastic [Populus euphratica]
Pop_A04G070772	ERD7	AT2G17840	Leaf	Hydathode cell	10.1093/plcell/koaa060	protein EARLY-RESPONSIVE TO DEHYDRATION 7, chloroplastic [Populus trichocarpa]
Pop_A06G085686	---	AT2G37110	Leaf	Hydathode cell	10.1093/plcell/koaa060	cell number regulator 8 [Populus trichocarpa]
Pop_A06G089509	ERH1	AT2G37940	Leaf	Hydathode cell	10.1093/plcell/koaa060	phosphatidylinositol:ceramide inositolphosphotransferase 1 [Populus trichocarpa]
Pop_A16G028743	SOUL-1	AT2G37970	Leaf	Hydathode cell	10.1093/plcell/koaa060	PREDICTED: heme-binding-like protein At3g10130, chloroplastic [Populus euphratica]
Pop_G08G063497	---	AT2G40270	Leaf	Hydathode cell	10.1093/plcell/koaa060	PREDICTED: inactive receptor-like serine/threonine-protein kinase At2g40270 isoform X2 [Populus euphratica]
Pop_A01G059838	UBDK GAMMA 4	AT2G46500	Leaf	Hydathode cell	10.1093/plcell/koaa060	phosphatidylinositol 4-kinase gamma 2 [Populus trichocarpa]
Pop_A06G085798	---	AT3G09830	Leaf	Hydathode cell	10.1093/plcell/koaa060	PREDICTED: probable receptor-like protein kinase At5g47070 isoform X1 [Populus euphratica]
Pop_A06G062190	---	AT3G10300	Leaf	Hydathode cell	10.1093/plcell/koaa060	probable calcium-binding protein CML49 [Populus trichocarpa]
Pop_A06G053582	SYR1	AT3G11820	Leaf	Hydathode cell	10.1093/plcell/koaa060	syntaxin-121 [Populus trichocarpa]
Pop_A11G021687	CYP72A8	AT3G14620	Leaf	Hydathode cell	10.1093/plcell/koaa060	cytochrome P450 CYP72A219 [Populus trichocarpa]
Pop_A01G017588	NDR1	AT3G20600	Leaf	Hydathode cell	10.1093/plcell/koaa060	protein NDR1 [Populus trichocarpa]
Pop_A12G068136	CYP71A22	AT3G48310	Leaf	Hydathode cell	10.1093/plcell/koaa060	cytochrome P450 71A1 [Populus trichocarpa]
Pop_A05G073094	ZAR1	AT3G50950	Leaf	Hydathode cell	10.1093/plcell/koaa060	disease resistance RPP13-like protein 4 [Populus trichocarpa]
Pop_A02G012275	CRCK2	AT4G00330	Leaf	Hydathode cell	10.1093/plcell/koaa060	calmodulin-binding receptor-like cytoplasmic kinase 2 isoform X1 [Populus trichocarpa]
Pop_A13G031234	---	AT4G03420	Leaf	Hydathode cell	10.1093/plcell/koaa060	uncharacterized protein LOC7494424 [Populus trichocarpa]
Pop_A08G046480	---	AT4G15470	Leaf	Hydathode cell	10.1093/plcell/koaa060	BI1-like protein [Populus trichocarpa]
Pop_A06G062163	SCL13	AT4G17230	Leaf	Hydathode cell	10.1093/plcell/koaa060	scarecrow-like protein 13 [Populus trichocarpa]
Pop_A04G018122	---	AT4G21570	Leaf	Hydathode cell	10.1093/plcell/koaa060	transmembrane protein 184C [Populus trichocarpa]
Pop_A07G070544	EP1	AT4G23170	Leaf	Hydathode cell	10.1093/plcell/koaa060	PREDICTED: cysteine-rich receptor-like protein kinase 10 [Populus euphratica]
Pop_A01G067192	RLK4	AT4G23180	Leaf	Hydathode cell	10.1093/plcell/koaa060	cysteine-rich receptor-like protein kinase 10 [Populus tomentosa]
Pop_A14G044789	---	AT4G23470	Leaf	Hydathode cell	10.1093/plcell/koaa060	uncharacterized protein LOC7494100 isoform X1 [Populus trichocarpa]
Pop_A01G059820	LACS4	AT4G23850	Leaf	Hydathode cell	10.1093/plcell/koaa060	long chain acyl-CoA synthetase 4 [Populus trichocarpa]
Pop_A04G036033	RGP2	AT5G15650	Leaf	Hydathode cell	10.1093/plcell/koaa060	UDP-arabinopyranose mutase 1 [Populus trichocarpa]
Pop_A13G009833	---	AT5G18310	Leaf	Hydathode cell	10.1093/plcell/koaa060	uncharacterized protein LOC7453593 [Populus trichocarpa]
Pop_A12G073993	SIGE	AT5G24120	Leaf	Hydathode cell	10.1093/plcell/koaa060	RNA polymerase sigma factor sigE, chloroplastic/mitochondrial [Populus trichocarpa]
Pop_A14G045010	TIP	AT5G24590	Leaf	Hydathode cell	10.1093/plcell/koaa060	NAC domain-containing protein 71 isoform X4 [Populus trichocarpa];NAC domain-containing protein 71 isoform X1 [Populus trichocarpa]
Pop_A04G029299	GSR 1	AT5G37600	Leaf	Hydathode cell	10.1093/plcell/koaa060	glutamine synthetase cytosolic isozyme 1 [Populus trichocarpa]
Pop_A02G024034	BIR1	AT5G48380	Leaf	Hydathode cell	10.1093/plcell/koaa060	probably inactive leucine-rich repeat receptor-like protein kinase At5g48380 [Populus trichocarpa]
Pop_A12G068140	WR3	AT5G50200	Leaf	Hydathode cell	10.1093/plcell/koaa060	high-affinity nitrate transporter 3.1 [Populus trichocarpa]
Pop_A09G014426	---	AT5G58720	Leaf	Hydathode cell	10.1093/plcell/koaa060	SMR domain-containing protein At5g58720 [Populus trichocarpa]
Pop_A12G019249	---	AT5G62570	Leaf	Hydathode cell	10.1093/plcell/koaa060	calmodulin-binding protein 60 A isoform X1 [Populus trichocarpa]
Pop_A08G046241	MUTE	AT3G06120	Stoma	Late-stage meristemoid	10.1111/tpj.12244	transcription factor MUTE [Populus trichocarpa]
Pop_A04G026315	MYB91	AT2G37630	Shoot apical	Leaf founder cell	10.1038/35050091	transcription factor AS1 [Populus trichocarpa]
Pop_A16G055203	YAB2	AT1G08465	Shoot apical	Leaf primordium	10.1093/pcp/pcv078	PREDICTED: putative axial regulator YABBY 2 [Populus euphratica]
Pop_A02G004912	MP	AT1G19850	Shoot apical	Leaf primordium	10.1093/pcp/pcv078	auxin response factor 5.1-like [Populus tomentosa]
Pop_A01G015498	PHB-1D	AT2G34710	Shoot apical	Leaf primordium	10.1093/pcp/pcv078	HD-ZIP family protein [Populus trichocarpa]
Pop_A13G010034	LBD15	AT2G40470	Shoot apical	Leaf primordium	10.1007/s00425-013-1844-x	LBD family protein [Populus trichocarpa]
Pop_A02G066302	---	AT2G44940	Shoot apical	Leaf primordium	10.1007/s10265-018-1074-1	ethylene-responsive transcription factor ERF038 [Populus trichocarpa]
Pop_A16G055236	PT	AT3G54720	Shoot apical	Leaf primordium	10.1093/pcp/pcv078	probable glutamate carboxypeptidase AMP1 [Populus trichocarpa]
Pop_A02G023849	HDG2	AT1G05230	Leaf	Meristemoid	10.1242/dev.090209	homeobox-leucine zipper protein HDG2 isoform X2 [Populus trichocarpa]
Pop_A08G063732	CLE9	AT1G26600	Leaf	Meristemoid	10.1016/j.devcel.2018.08.007	hypothetical protein POPTR_008G093500 [Populus trichocarpa]
Pop_A01G059692	YDA	AT1G63700	Leaf	Meristemoid	10.1146/annurev-arplant-042811-105451	mitogen-activated protein kinase kinase kinase YODA [Populus trichocarpa]
Pop_A01G054726	TMM	AT1G80080	Leaf	Meristemoid	10.1105/tpc.7.12.2227	protein TOO MANY MOUTHS [Populus trichocarpa]
Pop_A08G046241	MUTE	AT3G06120	Leaf	Meristemoid	10.1038/nature05467	transcription factor MUTE [Populus trichocarpa]
Pop_A01G010392	FMA	AT3G24140	Leaf	Meristemoid	10.1038/nature05467	PREDICTED: transcription factor FAMA isoform X2 [Populus euphratica];transcription factor FAMA isoform X1 [Populus trichocarpa]
Pop_A12G067922	SCRM	AT3G26744	Leaf	Meristemoid	10.1105/tpc.108.060848	inducer of CBF expression 2 protein [Populus suaveolens]
Pop_A08G063551	MKP1	AT3G55270	Leaf	Meristemoid	10.1104/pp.18.00475	protein-tyrosine-phosphatase MKP1 [Populus trichocarpa]
Pop_A06G062913	---	AT4G31805	Leaf	Meristemoid	10.1105/tpc.111.088583	hypothetical protein [Populus tomentosa]
Pop_A12G074000	SPCH	AT5G53210	Leaf	Meristemoid	10.1038/nature05491	transcription factor SPEECHLESS [Populus trichocarpa]
Pop_A12G074000	SPCH	AT5G53210	Leaf	Meristemoid	10.1038/nature05467	transcription factor SPEECHLESS [Populus trichocarpa]
Pop_A12G007863	ERL1	AT5G62230	Leaf	Meristemoid	10.1126/science.1109710	LRR receptor-like serine/threonine-protein kinase ERL1 [Populus trichocarpa]
Pop_A05G073201	---	AT5G65590	Leaf	Meristemoid	10.1186/s12870-016-0851-z	Dof-type zinc finger DNA-binding family protein [Populus tomentosa]
Pop_A13G032426	EPF2	AT1G34245	Leaf	Meristemoid mother cell	10.1093/pcp/pcp068	protein EPIDERMAL PATTERNING FACTOR 2 [Populus trichocarpa]
Pop_A06G062913	---	AT4G31805	Leaf	Meristemoid mother cell	10.1146/annurev-arplant-042811-105451	hypothetical protein [Populus tomentosa]
Pop_A12G074000	SPCH	AT5G53210	Leaf	Meristemoid mother cell	10.1146/annurev-arplant-042811-105451	transcription factor SPEECHLESS [Populus trichocarpa]
Pop_A15G064523	BASL	AT5G60880	Leaf	Meristemoid mother cell	10.1146/annurev-arplant-042811-105451	protein BREAKING OF ASYMMETRY IN THE STOMATAL LINEAGE [Populus trichocarpa]
Pop_A02G012368	---	AT1G01320	Leaf	Mesophyll cell	10.1093/plcell/koaa060	protein TSS [Populus trichocarpa]
Pop_A02G012346	TBL25	AT1G01430	Leaf	Mesophyll cell	10.1038/nature13919	PREDICTED: protein trichome birefringence-like 25 isoform X1 [Populus euphratica]
Pop_A01G074872	---	AT1G01630	Leaf	Mesophyll cell	10.1038/nature13919	PREDICTED: random slug protein 5-like [Populus euphratica]
Pop_A02G012263	SPPL4	AT1G01650	Leaf	Mesophyll cell	10.1093/plcell/koaa060	signal peptide peptidase-like 4 isoform X1 [Populus trichocarpa]
Pop_A02G066277	---	AT1G02150	Leaf	Mesophyll cell	10.1093/plcell/koaa060	PREDICTED: pentatricopeptide repeat-containing protein At1g02150 [Populus euphratica]
Pop_A02G031349	GSTF6	AT1G02930	Leaf	Mesophyll cell	10.1093/plcell/koaa060	glutathione S-transferase F4 [Populus yatungensis]
Pop_A13G031221	PORC	AT1G03630	Leaf	Mesophyll cell	10.1093/plcell/koaa060	protochlorophyllide reductase [Populus trichocarpa]
Pop_A02G033055	---	AT1G04040	Leaf	Mesophyll cell	10.1038/nature13919	acid phosphatase 1 [Populus trichocarpa]
Pop_A08G046086	---	AT1G04420	Leaf	Mesophyll cell	10.1093/plcell/koaa060	uncharacterized protein LOC7467537 [Populus trichocarpa]
Pop_A01G029692	LIP2	AT1G04640	Leaf	Mesophyll cell	10.1093/plcell/koaa060	hypothetical protein POPTR_003G212100 [Populus trichocarpa]
Pop_A02G005122	Tic20-I	AT1G04940	Leaf	Mesophyll cell	10.1093/plcell/koaa060	protein TIC 20-I, chloroplastic [Populus trichocarpa]
Pop_A02G023919	EFE	AT1G05010	Leaf	Mesophyll cell	10.1038/nature13919	1-aminocyclopropane-1-carboxylate oxidase [Populus trichocarpa]
Pop_A02G023919	EFE	AT1G05010	Leaf	Mesophyll cell	10.1093/plcell/koaa060	1-aminocyclopropane-1-carboxylate oxidase [Populus trichocarpa]
Pop_A08G011989	Psb27-H1	AT1G05385	Leaf	Mesophyll cell	10.1093/plcell/koaa060	photosystem II D1 precursor processing protein PSB27-H2, chloroplastic [Populus trichocarpa]
Pop_A02G065227	---	AT1G06190	Leaf	Mesophyll cell	10.1093/plcell/koaa060	rho-N domain-containing protein 1, chloroplastic [Populus trichocarpa]
Pop_A05G001774	---	AT1G06690	Leaf	Mesophyll cell	10.1093/plcell/koaa060	uncharacterized oxidoreductase At1g06690, chloroplastic [Populus trichocarpa]
Pop_A11G056463	NDA1	AT1G07180	Leaf	Mesophyll cell	10.1093/plcell/koaa060	internal alternative NAD(P)H-ubiquinone oxidoreductase A1, mitochondrial [Populus trichocarpa]
Pop_A05G071931	ERD6	AT1G08930	Leaf	Mesophyll cell	10.1038/nature13919	PREDICTED: sugar transporter ERD6-like 5 [Populus euphratica]
Pop_A13G054181	TOC64-I	AT1G08980	Leaf	Mesophyll cell	10.1038/nature13919	amidase 1 [Populus trichocarpa]
Pop_A05G016828	---	AT1G09310	Leaf	Mesophyll cell	10.1038/nature13919	uncharacterized protein LOC7455188 [Populus trichocarpa]
Pop_G02G065959	---	AT1G09750	Leaf	Mesophyll cell	10.1038/nature13919	aspartyl protease AED3 [Populus trichocarpa]
Pop_A04G018352	SS3	AT1G11720	Leaf	Mesophyll cell	10.1038/nature13919	starch synthase 3, chloroplastic/amyloplastic [Populus trichocarpa]
Pop_A03G035560	VAC-INV	AT1G12240	Leaf	Mesophyll cell	10.1038/nature13919	PREDICTED: acid beta-fructofuranosidase-like [Populus euphratica]
Pop_A03G050444	---	AT1G12250	Leaf	Mesophyll cell	10.1093/plcell/koaa060	thylakoid lumenal protein TL20.3, chloroplastic isoform X1 [Populus trichocarpa]
Pop_A08G063985	MAP1C	AT1G13270	Leaf	Mesophyll cell	10.1093/plcell/koaa060	methionine aminopeptidase 1B, chloroplastic-like isoform X1 [Populus trichocarpa]
Pop_A10G069652	---	AT1G13820	Leaf	Mesophyll cell	10.1093/plcell/koaa060	uncharacterized protein LOC7468154 isoform X1 [Populus trichocarpa]
Pop_A10G069364	---	AT1G13990	Leaf	Mesophyll cell	10.1093/plcell/koaa060	uncharacterized protein LOC7492916 [Populus trichocarpa]
Pop_A10G069389	PQL2	AT1G14150	Leaf	Mesophyll cell	10.1038/nature13919	oxygen evolving enhancer 3 [Populus tomentosa]
Pop_A10G069389	PQL2	AT1G14150	Leaf	Mesophyll cell	10.1093/plcell/koaa060	oxygen evolving enhancer 3 [Populus tomentosa]
Pop_A08G012037	---	AT1G14270	Leaf	Mesophyll cell	10.1093/plcell/koaa060	uncharacterized protein LOC7471488 [Populus trichocarpa]
Pop_A08G012028	---	AT1G14345	Leaf	Mesophyll cell	10.1093/plcell/koaa060	PREDICTED: uncharacterized protein LOC109166077 [Ipomoea nil]
Pop_A08G086541	PAP3	AT1G14700	Leaf	Mesophyll cell	10.1093/plcell/koaa060	hypothetical protein POPTR_008G139300 [Populus trichocarpa]
Pop_A01G004516	PDF1A	AT1G15390	Leaf	Mesophyll cell	10.1093/plcell/koaa060	hypothetical protein POPTR_001G171800 [Populus trichocarpa]
Pop_A01G004038	GA4	AT1G15550	Leaf	Mesophyll cell	10.1093/plcell/koaa060	gibberellin 3-beta-dioxygenase 1 [Populus trichocarpa]
Pop_A01G080039	PnsB1	AT1G15980	Leaf	Mesophyll cell	10.1038/nature13919	NDH-dependent cyclic electron flow 1 [Populus tomentosa]
Pop_A01G080039	PnsB1	AT1G15980	Leaf	Mesophyll cell	10.1093/plcell/koaa060	NDH-dependent cyclic electron flow 1 [Populus tomentosa]
Pop_A01G080001	---	AT1G16080	Leaf	Mesophyll cell	10.1093/plcell/koaa060	uncharacterized protein LOC18094378 isoform X1 [Populus trichocarpa]
Pop_A07G062779	HCF173	AT1G16720	Leaf	Mesophyll cell	10.1093/plcell/koaa060	uncharacterized protein LOC7497749 [Populus trichocarpa]
Pop_A01G024911	---	AT1G17200	Leaf	Mesophyll cell	10.1038/nature13919	CASP-like protein 2A2 [Populus trichocarpa]
Pop_A03G049636	GR2	AT1G17650	Leaf	Mesophyll cell	10.1093/plcell/koaa060	PREDICTED: glyoxylate/succinic semialdehyde reductase 2, chloroplastic-like [Populus euphratica]
Pop_A01G010418	WBC11	AT1G17840	Leaf	Mesophyll cell	10.1038/nature13919	ABC transporter G family member 11-like isoform X1 [Populus trichocarpa]
Pop_A12G073834	---	AT1G18060	Leaf	Mesophyll cell	10.1093/plcell/koaa060	PREDICTED: uncharacterized protein LOC105135767 isoform X1 [Populus euphratica]
Pop_A12G073817	---	AT1G18170	Leaf	Mesophyll cell	10.1093/plcell/koaa060	PREDICTED: peptidyl-prolyl cis-trans isomerase FKBP17-2, chloroplastic-like isoform X1 [Populus euphratica]
Pop_A12G073814	---	AT1G18210	Leaf	Mesophyll cell	10.1093/plcell/koaa060	probable calcium-binding protein CML27 [Populus trichocarpa]
Pop_A12G019387	PnsB4	AT1G18730	Leaf	Mesophyll cell	10.1093/plcell/koaa060	NDH dependent flow 6 [Populus tomentosa]
Pop_A06G079375	Lhca6	AT1G19150	Leaf	Mesophyll cell	10.1093/plcell/koaa060	unknown [Populus trichocarpa x Populus deltoides]
Pop_A02G004947	TUB5	AT1G20010	Leaf	Mesophyll cell	10.1038/nature13919	tubulin beta chain [Populus trichocarpa]
Pop_A02G065616	---	AT1G21380	Leaf	Mesophyll cell	10.1093/plcell/koaa060	TOM1-like protein 3 isoform X1 [Populus trichocarpa]
Pop_A01G010406	UGT85A2	AT1G22360	Leaf	Mesophyll cell	10.1038/nature13919	PREDICTED: 7-deoxyloganetin glucosyltransferase-like [Populus euphratica]
Pop_A19G052448	---	AT1G22430	Leaf	Mesophyll cell	10.1038/nature13919	PREDICTED: alcohol dehydrogenase-like 2 isoform X1 [Populus euphratica];PREDICTED: alcohol dehydrogenase-like 1 [Populus euphratica];alcohol dehydrogenase-like 1 isoform X2 [Populus trichocarpa]
Pop_A19G052448	---	AT1G22430	Leaf	Mesophyll cell	10.1093/plcell/koaa060	PREDICTED: alcohol dehydrogenase-like 2 isoform X1 [Populus euphratica];PREDICTED: alcohol dehydrogenase-like 1 [Populus euphratica];alcohol dehydrogenase-like 1 isoform X2 [Populus trichocarpa]
Pop_A13G082786	AGL87	AT1G22590	Leaf	Mesophyll cell	10.1093/plcell/koaa060	agamous-like MADS-box protein AGL80 [Populus trichocarpa]
Pop_A13G082676	---	AT1G22700	Leaf	Mesophyll cell	10.1093/plcell/koaa060	Tetratricopeptide repeat (TPR) [Populus tomentosa]
Pop_A13G082683	SUT1	AT1G22710	Leaf	Mesophyll cell	10.1111/nph.13941	sucrose transporter 1 [Populus trichocarpa]
Pop_A13G082706	---	AT1G22850	Leaf	Mesophyll cell	10.1093/plcell/koaa060	uncharacterized protein LOC18104350 isoform X1 [Populus trichocarpa];uncharacterized protein LOC18104350 isoform X2 [Populus trichocarpa]
Pop_G01G067717	PIN7	AT1G23080	Leaf	Mesophyll cell	10.1038/nature13919	hypothetical protein POPTR_001G205200 [Populus trichocarpa]
Pop_A08G046150	AOR	AT1G23740	Leaf	Mesophyll cell	10.1093/plcell/koaa060	unknown [Populus trichocarpa]
Pop_A08G063689	---	AT1G26761	Leaf	Mesophyll cell	10.1093/plcell/koaa060	uncharacterized protein LOC18101449 [Populus trichocarpa]
Pop_A01G079974	LTPG1	AT1G27950	Leaf	Mesophyll cell	10.1038/nature13919	non-specific lipid transfer protein GPI-anchored 1 [Populus trichocarpa]
Pop_A11G056715	ERD2	AT1G29330	Leaf	Mesophyll cell	10.1093/plcell/koaa060	ER lumen protein-retaining receptor A [Populus trichocarpa];PREDICTED: ER lumen protein-retaining receptor A [Populus euphratica]
Pop_A04G070653	---	AT1G29450	Leaf	Mesophyll cell	10.1038/nature13919	auxin-responsive protein SAUR68-like [Durio zibethinus]
Pop_A01G010159	---	AT1G29660	Leaf	Mesophyll cell	10.1038/nature13919	PREDICTED: GDSL esterase/lipase At1g29670-like [Populus euphratica]
Pop_A03G034672	---	AT1G29670	Leaf	Mesophyll cell	10.1038/nature13919	PREDICTED: GDSL esterase/lipase At4g18970-like [Populus euphratica]
Pop_A04G030680	---	AT1G30260	Leaf	Mesophyll cell	10.1093/plcell/koaa060	hypothetical protein POPTR_004G133180 [Populus trichocarpa]
Pop_A12G027521	IMPL1	AT1G31190	Leaf	Mesophyll cell	10.1093/plcell/koaa060	phosphatase IMPL1, chloroplastic [Populus trichocarpa]
Pop_A03G050295	LrgB	AT1G32080	Leaf	Mesophyll cell	10.1038/nature13919	plastidal glycolate/glycerate translocator 1, chloroplastic [Populus trichocarpa]
Pop_A03G050295	LrgB	AT1G32080	Leaf	Mesophyll cell	10.1093/plcell/koaa060	plastidal glycolate/glycerate translocator 1, chloroplastic [Populus trichocarpa]
Pop_A01G004162	---	AT1G32220	Leaf	Mesophyll cell	10.1093/plcell/koaa060	uncharacterized protein At1g32220, chloroplastic isoform X1 [Populus trichocarpa]
Pop_A03G050198	---	AT1G32520	Leaf	Mesophyll cell	10.1093/plcell/koaa060	uncharacterized protein LOC18096954 [Populus trichocarpa]
Pop_A03G019866	FdC1	AT1G32550	Leaf	Mesophyll cell	10.1093/plcell/koaa060	hypothetical protein POPTR_003G176400 [Populus trichocarpa]
Pop_A01G025097	---	AT1G32780	Leaf	Mesophyll cell	10.1038/nature13919	hypothetical protein POPTR_001G448700 [Populus trichocarpa]
Pop_A01G025091	GBSS1	AT1G32900	Leaf	Mesophyll cell	10.1038/nature13919	hypothetical protein [Populus tomentosa]
Pop_A02G088594	---	AT1G34750	Leaf	Mesophyll cell	10.1093/plcell/koaa060	probable protein phosphatase 2C 9 [Populus trichocarpa]
Pop_A05G056054	NR2	AT1G37130	Leaf	Mesophyll cell	10.1093/plcell/koaa060	nitrate reductase [NADH] [Populus trichocarpa]
Pop_A05G056258	FINS1	AT1G43670	Leaf	Mesophyll cell	10.1038/nature13919	fructose-1,6-bisphosphatase, cytosolic isoform X1 [Populus trichocarpa]
Pop_A05G056258	FINS1	AT1G43670	Leaf	Mesophyll cell	10.1093/plcell/koaa060	fructose-1,6-bisphosphatase, cytosolic isoform X1 [Populus trichocarpa]
Pop_A02G088637	CH1	AT1G44446	Leaf	Mesophyll cell	10.1093/plcell/koaa060	chlorophyllide a oxygenase, chloroplastic isoform X1 [Populus trichocarpa]
Pop_A02G066373	---	AT1G44920	Leaf	Mesophyll cell	10.1093/plcell/koaa060	PREDICTED: uncharacterized protein LOC105120530 isoform X1 [Populus euphratica]
Pop_A09G026589	---	AT1G49380	Leaf	Mesophyll cell	10.1093/plcell/koaa060	cytochrome c biogenesis protein CCS1, chloroplastic [Populus trichocarpa]
Pop_A09G026571	LRD2	AT1G49430	Leaf	Mesophyll cell	10.1038/nature13919	PREDICTED: long chain acyl-CoA synthetase 2 isoform X1 [Populus euphratica]
Pop_A01G010326	---	AT1G49975	Leaf	Mesophyll cell	10.1093/plcell/koaa060	PREDICTED: uncharacterized protein LOC105129792 [Populus euphratica]
Pop_A01G010310	---	AT1G49980	Leaf	Mesophyll cell	10.1093/plcell/koaa060	PREDICTED: DNA polymerase kappa [Populus euphratica]
Pop_A09G029027	---	AT1G50450	Leaf	Mesophyll cell	10.1093/plcell/koaa060	uncharacterized protein LOC7467386 isoform X2 [Populus trichocarpa]
Pop_A18G089866	---	AT1G51805	Leaf	Mesophyll cell	10.1038/nature13919	hypothetical protein POPTR_018G107900 [Populus trichocarpa]
Pop_A01G054732	---	AT1G52510	Leaf	Mesophyll cell	10.1093/plcell/koaa060	PREDICTED: uncharacterized protein LOC105113285 [Populus euphratica]
Pop_A01G004491	---	AT1G52720	Leaf	Mesophyll cell	10.1093/plcell/koaa060	uncharacterized protein LOC7478123 [Populus trichocarpa]
Pop_A01G074933	---	AT1G52870	Leaf	Mesophyll cell	10.1093/plcell/koaa060	protein SYM1 [Populus trichocarpa]
Pop_A01G003825	ALDH7B4	AT1G54100	Leaf	Mesophyll cell	10.1093/plcell/koaa060	PREDICTED: aldehyde dehydrogenase family 7 member B4 isoform X1 [Populus euphratica]
Pop_A03G014606	---	AT1G55260	Leaf	Mesophyll cell	10.1038/nature13919	protein YLS3 [Populus trichocarpa]
Pop_A19G052305	NDF5	AT1G55370	Leaf	Mesophyll cell	10.1093/plcell/koaa060	hypothetical protein VITISV_016184 [Vitis vinifera]
Pop_A03G076477	ZKT	AT1G55480	Leaf	Mesophyll cell	10.1093/plcell/koaa060	PREDICTED: uncharacterized protein LOC105126081 [Populus euphratica]
Pop_A01G015530	CSLE1	AT1G55850	Leaf	Mesophyll cell	10.1038/nature13919	cellulose synthase-like protein E1 [Populus tomentosa]
Pop_A01G025055	---	AT1G56050	Leaf	Mesophyll cell	10.1093/plcell/koaa060	uncharacterized protein LOC7490749 [Populus trichocarpa]
Pop_A05G016817	---	AT1G56500	Leaf	Mesophyll cell	10.1038/nature13919	protein SUPPRESSOR OF QUENCHING 1, chloroplastic isoform X1 [Populus trichocarpa]
Pop_A05G016817	---	AT1G56500	Leaf	Mesophyll cell	10.1093/plcell/koaa060	protein SUPPRESSOR OF QUENCHING 1, chloroplastic isoform X1 [Populus trichocarpa]
Pop_A03G049383	---	AT1G57770	Leaf	Mesophyll cell	10.1093/plcell/koaa060	prolycopene isomerase, chloroplastic [Populus trichocarpa]
Pop_A03G050291	---	AT1G58602	Leaf	Mesophyll cell	10.1038/nature13919	hypothetical protein POPTR_003G099200 [Populus trichocarpa]
Pop_A08G045853	CCB4	AT1G59840	Leaf	Mesophyll cell	10.1093/plcell/koaa060	protein COFACTOR ASSEMBLY OF COMPLEX C SUBUNIT B CCB4, chloroplastic isoform X1 [Populus trichocarpa]
Pop_A01G032346	PEN3	AT1G59870	Leaf	Mesophyll cell	10.1038/nature13919	PREDICTED: ABC transporter G family member 29-like [Populus euphratica]
Pop_A17G030796	---	AT1G61190	Leaf	Mesophyll cell	10.1038/nature13919	hypothetical protein POPTR_017G034400 [Populus trichocarpa]
Pop_A11G026263	---	AT1G62250	Leaf	Mesophyll cell	10.1093/plcell/koaa060	PREDICTED: uncharacterized protein LOC105113522 isoform X1 [Populus euphratica]
Pop_A03G050450	SCO1	AT1G62750	Leaf	Mesophyll cell	10.1093/plcell/koaa060	PREDICTED: elongation factor G-2, chloroplastic [Populus euphratica]
Pop_A01G059943	---	AT1G62780	Leaf	Mesophyll cell	10.1093/plcell/koaa060	uncharacterized protein LOC18094390 [Populus trichocarpa]
Pop_A01G059763	---	AT1G64150	Leaf	Mesophyll cell	10.1093/plcell/koaa060	hypothetical protein POPTR_001G097100 [Populus trichocarpa]
Pop_A03G014933	---	AT1G64680	Leaf	Mesophyll cell	10.1093/plcell/koaa060	hypothetical protein POPTR_003G147500 [Populus trichocarpa]
Pop_A13G010097	PnsB2	AT1G64770	Leaf	Mesophyll cell	10.1093/plcell/koaa060	hypothetical protein POPTR_013G058600, partial [Populus trichocarpa]
Pop_A13G074180	---	AT1G65230	Leaf	Mesophyll cell	10.1093/plcell/koaa060	uncharacterized protein LOC7493921 [Populus trichocarpa]
Pop_A08G064027	POP1	AT1G68530	Leaf	Mesophyll cell	10.1038/nature13919	3-ketoacyl-CoA synthase 6 [Populus trichocarpa]
Pop_A08G063671	---	AT1G69523	Leaf	Mesophyll cell	10.1093/plcell/koaa060	hypothetical protein [Populus tomentosa]
Pop_G10G000150	NdhL	AT1G70760	Leaf	Mesophyll cell	10.1038/nature13919	NAD(P)H-quinone oxidoreductase subunit L, chloroplastic isoform X1 [Populus trichocarpa]
Pop_G10G000150	NdhL	AT1G70760	Leaf	Mesophyll cell	10.1093/plcell/koaa060	NAD(P)H-quinone oxidoreductase subunit L, chloroplastic isoform X1 [Populus trichocarpa]
Pop_A08G002452	---	AT1G70820	Leaf	Mesophyll cell	10.1038/nature13919	uncharacterized protein LOC7488408 [Populus trichocarpa]
Pop_A08G064125	---	AT1G70985	Leaf	Mesophyll cell	10.1093/plcell/koaa060	PREDICTED: formin-like protein 20 [Populus euphratica]
Pop_A19G053234	---	AT1G71480	Leaf	Mesophyll cell	10.1038/nature13919	PREDICTED: uncharacterized protein LOC105133813 isoform X1 [Populus euphratica]
Pop_A01G003850	---	AT1G72430	Leaf	Mesophyll cell	10.1038/nature13919	auxin-responsive protein SAUR50 [Populus trichocarpa]
Pop_A01G003850	---	AT1G72430	Leaf	Mesophyll cell	10.1093/plcell/koaa060	auxin-responsive protein SAUR50 [Populus trichocarpa]
Pop_A03G049925	---	AT1G72640	Leaf	Mesophyll cell	10.1093/plcell/koaa060	PREDICTED: uncharacterized protein At5g02240 isoform X1 [Populus euphratica]
Pop_A01G080035	LPA3	AT1G73060	Leaf	Mesophyll cell	10.1093/plcell/koaa060	hypothetical protein POPTR_001G044000 [Populus trichocarpa]
Pop_A12G073749	---	AT1G73480	Leaf	Mesophyll cell	10.1093/plcell/koaa060	PREDICTED: monoglyceride lipase-like isoform X2 [Populus euphratica]
Pop_A12G073714	---	AT1G73530	Leaf	Mesophyll cell	10.1093/plcell/koaa060	organelle RRM domain-containing protein 6, chloroplastic isoform X2 [Populus trichocarpa]
Pop_A05G071845	---	AT1G73920	Leaf	Mesophyll cell	10.1093/plcell/koaa060	hypothetical protein POPTR_005G048600 [Populus trichocarpa]
Pop_A12G073900	---	AT1G74070	Leaf	Mesophyll cell	10.1093/plcell/koaa060	peptidyl-prolyl cis-trans isomerase CYP26-2, chloroplastic [Populus trichocarpa]
Pop_A07G006649	NdhO	AT1G74880	Leaf	Mesophyll cell	10.1038/nature13919	NAD(P)H-quinone oxidoreductase subunit O, chloroplastic [Populus trichocarpa]
Pop_A07G006649	NdhO	AT1G74880	Leaf	Mesophyll cell	10.1093/plcell/koaa060	NAD(P)H-quinone oxidoreductase subunit O, chloroplastic [Populus trichocarpa]
Pop_A02G066227	JAC1	AT1G75100	Leaf	Mesophyll cell	10.1038/nature13919	J domain-containing protein required for chloroplast accumulation response 1 isoform X1 [Populus trichocarpa]
Pop_A02G005139	---	AT1G75460	Leaf	Mesophyll cell	10.1038/nature13919	uncharacterized protein LOC7479711 [Populus trichocarpa]
Pop_A02G004925	LQY1	AT1G75690	Leaf	Mesophyll cell	10.1038/nature13919	PREDICTED: protein disulfide-isomerase LQY1-like [Populus euphratica]
Pop_A02G065579	---	AT1G77090	Leaf	Mesophyll cell	10.1093/plcell/koaa060	PREDICTED: psbP domain-containing protein 4, chloroplastic [Populus euphratica]
Pop_A02G088734	TAPX	AT1G77490	Leaf	Mesophyll cell	10.1093/plcell/koaa060	probable L-ascorbate peroxidase 6, chloroplastic/mitochondrial [Populus trichocarpa]
Pop_A02G088735	NR1	AT1G77760	Leaf	Mesophyll cell	10.1038/nature13919	nitrate reductase [NADH] [Populus trichocarpa]
Pop_A02G088601	---	AT1G78230	Leaf	Mesophyll cell	10.1038/nature13919	uncharacterized protein LOC7461781 [Populus trichocarpa]
Pop_A07G062778	---	AT1G78995	Leaf	Mesophyll cell	10.1093/plcell/koaa060	uncharacterized protein LOC7497748 [Populus trichocarpa]
Pop_A10G069483	MCP2d	AT1G79340	Leaf	Mesophyll cell	10.1093/plcell/koaa060	metacaspase-4 [Populus trichocarpa]
Pop_A10G069461	---	AT1G79510	Leaf	Mesophyll cell	10.1093/plcell/koaa060	uncharacterized protein LOC7492960 [Populus trichocarpa]
Pop_A15G014676	---	AT1G79600	Leaf	Mesophyll cell	10.1093/plcell/koaa060	hypothetical protein POPTR_015G143100 [Populus trichocarpa]
Pop_A01G003938	---	AT1G80380	Leaf	Mesophyll cell	10.1038/nature13919	D-glycerate 3-kinase, chloroplastic isoform X1 [Populus trichocarpa]
Pop_A01G003938	---	AT1G80380	Leaf	Mesophyll cell	10.1093/plcell/koaa060	D-glycerate 3-kinase, chloroplastic isoform X1 [Populus trichocarpa]
Pop_A04G010960	PIN4	AT2G01420	Leaf	Mesophyll cell	10.1038/nature13919	PIN13 [Populus tomentosa]
Pop_A10G048416	CRR3	AT2G01590	Leaf	Mesophyll cell	10.1038/nature13919	probable NAD(P)H dehydrogenase subunit CRR3, chloroplastic [Populus trichocarpa]
Pop_A10G048416	CRR3	AT2G01590	Leaf	Mesophyll cell	10.1093/plcell/koaa060	probable NAD(P)H dehydrogenase subunit CRR3, chloroplastic [Populus trichocarpa]
Pop_A08G086498	---	AT2G01755	Leaf	Mesophyll cell	10.1093/plcell/koaa060	uncharacterized protein LOC7457807 [Populus trichocarpa]
Pop_A01G032083	---	AT2G01870	Leaf	Mesophyll cell	10.1093/plcell/koaa060	uncharacterized protein LOC7485749 [Populus trichocarpa]
Pop_A17G075188	PQL3	AT2G01918	Leaf	Mesophyll cell	10.1093/plcell/koaa060	Oxygen evolving enhancer protein 3 (PsbQ) [Populus tomentosa]
Pop_A08G086426	IDD5	AT2G02070	Leaf	Mesophyll cell	10.1038/nature13919	protein indeterminate-domain 5, chloroplastic [Populus trichocarpa]
Pop_A04G010792	MCT	AT2G02500	Leaf	Mesophyll cell	10.1093/plcell/koaa060	PREDICTED: 2-C-methyl-D-erythritol 4-phosphate cytidylyltransferase, chloroplastic isoform X1 [Populus euphratica]
Pop_A14G045405	---	AT2G04790	Leaf	Mesophyll cell	10.1093/plcell/koaa060	PREDICTED: uncharacterized protein LOC105110235 [Populus euphratica]
Pop_A14G045435	LHCB2.1	AT2G05100	Leaf	Mesophyll cell	10.1104/pp.108.126946	chlorophyll a-b binding protein 151, chloroplastic [Populus trichocarpa]
Pop_A04G002715	OPR3	AT2G06050	Leaf	Mesophyll cell	10.1093/plcell/koaa060	artemisinic aldehyde Delta(11(13)) reductase isoform X3 [Populus trichocarpa]
Pop_A09G026777	PLA2-ALPHA	AT2G06925	Leaf	Mesophyll cell	10.1038/nature13919	phospholipase A2-alpha [Populus trichocarpa]
Pop_A06G061665	---	AT2G10940	Leaf	Mesophyll cell	10.1093/plcell/koaa060	36.4 kDa proline-rich protein [Populus trichocarpa]
Pop_A09G033819	---	AT2G15020	Leaf	Mesophyll cell	10.1038/nature13919	uncharacterized protein LOC7457566 [Populus trichocarpa]
Pop_A09G033819	---	AT2G15020	Leaf	Mesophyll cell	10.1093/plcell/koaa060	uncharacterized protein LOC7457566 [Populus trichocarpa]
Pop_A04G002598	Kin3	AT2G17220	Leaf	Mesophyll cell	10.1093/plcell/koaa060	PREDICTED: probable serine/threonine-protein kinase Cx32, chloroplastic [Populus euphratica]
Pop_A05G073245	---	AT2G17695	Leaf	Mesophyll cell	10.1093/plcell/koaa060	UPF0548 protein At2g17695 isoform X2 [Populus trichocarpa]
Pop_A04G070772	ERD7	AT2G17840	Leaf	Mesophyll cell	10.1093/plcell/koaa060	protein EARLY-RESPONSIVE TO DEHYDRATION 7, chloroplastic [Populus trichocarpa]
Pop_A05G073142	---	AT2G17972	Leaf	Mesophyll cell	10.1093/plcell/koaa060	PREDICTED: uncharacterized protein LOC105138730 [Populus euphratica]
Pop_A07G085236	GPRI1	AT2G20570	Leaf	Mesophyll cell	10.1038/nature13919	transcription activator GLK1-like [Populus trichocarpa]
Pop_A04G070610	---	AT2G20920	Leaf	Mesophyll cell	10.1093/plcell/koaa060	hypothetical protein POPTR_004G177300 [Populus trichocarpa]
Pop_A06G062977	---	AT2G21080	Leaf	Mesophyll cell	10.1038/nature13919	uncharacterized protein LOC18100793 isoform X1 [Populus trichocarpa]
Pop_A09G025664	SULA	AT2G21280	Leaf	Mesophyll cell	10.1093/plcell/koaa060	epimerase family protein SDR39U1 homolog, chloroplastic isoform X2 [Populus trichocarpa]
Pop_A09G025687	---	AT2G21340	Leaf	Mesophyll cell	10.1093/plcell/koaa060	protein DETOXIFICATION 46, chloroplastic [Populus trichocarpa]
Pop_A05G073617	---	AT2G21960	Leaf	Mesophyll cell	10.1093/plcell/koaa060	uncharacterized protein LOC7477130 isoform X1 [Populus trichocarpa];uncharacterized protein LOC7477130 isoform X2 [Populus trichocarpa]
Pop_A13G010108	---	AT2G23840	Leaf	Mesophyll cell	10.1038/nature13919	PREDICTED: uncharacterized protein LOC105132505 [Populus euphratica]
Pop_A06G064851	---	AT2G24060	Leaf	Mesophyll cell	10.1093/plcell/koaa060	hypothetical protein POPTR_006G182000 [Populus trichocarpa]
Pop_A06G062985	---	AT2G24395	Leaf	Mesophyll cell	10.1093/plcell/koaa060	uncharacterized protein LOC18100787 isoform X2 [Populus trichocarpa]
Pop_A06G053403	KCS10	AT2G26250	Leaf	Mesophyll cell	10.1038/nature13919	PREDICTED: 3-ketoacyl-CoA synthase 10 [Populus euphratica]
Pop_A02G066185	PDE135	AT2G26510	Leaf	Mesophyll cell	10.1038/nature13919	nucleobase-ascorbate transporter 3 [Populus trichocarpa]
Pop_G18G000077	PEC1	AT2G26910	Leaf	Mesophyll cell	10.1038/nature13919	ABC transporter G family member 32 [Populus trichocarpa]
Pop_A09G076847	---	AT2G27680	Leaf	Mesophyll cell	10.1093/plcell/koaa060	flagellar radial spoke protein 5 isoform X1 [Populus trichocarpa]
Pop_A09G083636	BGAL8	AT2G28470	Leaf	Mesophyll cell	10.1038/nature13919	beta-galactosidase 8 [Populus trichocarpa]
Pop_A06G064754	---	AT2G28605	Leaf	Mesophyll cell	10.1093/plcell/koaa060	0
Pop_A01G056902	---	AT2G29180	Leaf	Mesophyll cell	10.1093/plcell/koaa060	uncharacterized protein LOC7465097 [Populus trichocarpa]
Pop_A08G063874	---	AT2G29290	Leaf	Mesophyll cell	10.1093/plcell/koaa060	hypothetical protein POPTR_008G107000 [Populus trichocarpa]
Pop_A01G006019	---	AT2G30170	Leaf	Mesophyll cell	10.1093/plcell/koaa060	hypothetical protein POPTR_001G282500 [Populus trichocarpa]
Pop_A14G045670	---	AT2G31040	Leaf	Mesophyll cell	10.1038/nature13919	uncharacterized protein LOC7458005 [Populus trichocarpa]
Pop_A14G045346	PTAC18	AT2G32180	Leaf	Mesophyll cell	10.1093/plcell/koaa060	uncharacterized protein LOC7462073 [Populus trichocarpa]
Pop_A02G023872	ARASP	AT2G32480	Leaf	Mesophyll cell	10.1093/plcell/koaa060	membrane metalloprotease ARASP, chloroplastic [Populus trichocarpa]
Pop_A14G045329	---	AT2G32500	Leaf	Mesophyll cell	10.1093/plcell/koaa060	stress-response A/B barrel domain-containing protein UP3 isoform X1 [Populus trichocarpa]
Pop_A02G023890	CSLB04	AT2G32540	Leaf	Mesophyll cell	10.1038/nature13919	cellulose synthase-like protein B2 [Populus tomentosa]
Pop_A04G018508	EMB3113	AT2G33800	Leaf	Mesophyll cell	10.1093/plcell/koaa060	PREDICTED: 30S ribosomal protein S5, chloroplastic [Populus euphratica]
Pop_A01G029529	EDA3	AT2G34860	Leaf	Mesophyll cell	10.1093/plcell/koaa060	PREDICTED: uncharacterized protein LOC105135002 [Populus euphratica]
Pop_A03G050268	SKL2	AT2G35500	Leaf	Mesophyll cell	10.1093/plcell/koaa060	probable inactive shikimate kinase like 2, chloroplastic [Populus trichocarpa]
Pop_A10G047066	---	AT2G35830	Leaf	Mesophyll cell	10.1038/nature13919	uncharacterized protein LOC7489627 [Populus trichocarpa]
Pop_A06G053487	---	AT2G36145	Leaf	Mesophyll cell	10.1093/plcell/koaa060	PREDICTED: uncharacterized protein LOC105110752 [Populus euphratica]
Pop_A06G089404	---	AT2G36630	Leaf	Mesophyll cell	10.1038/nature13919	sulfite exporter TauE/SafE family protein 4 [Populus trichocarpa]
Pop_A16G028671	---	AT2G36895	Leaf	Mesophyll cell	10.1093/plcell/koaa060	uncharacterized protein LOC7486515 isoform X2 [Populus trichocarpa]
Pop_A06G085686	---	AT2G37110	Leaf	Mesophyll cell	10.1093/plcell/koaa060	cell number regulator 8 [Populus trichocarpa]
Pop_A06G085724	---	AT2G37240	Leaf	Mesophyll cell	10.1093/plcell/koaa060	thioredoxin-like protein AAED1, chloroplastic isoform X1 [Populus trichocarpa]
Pop_A06G061427	---	AT2G37660	Leaf	Mesophyll cell	10.1093/plcell/koaa060	uncharacterized protein At5g02240 [Populus trichocarpa]
Pop_A06G089525	emb1513	AT2G37920	Leaf	Mesophyll cell	10.1093/plcell/koaa060	uncharacterized protein LOC7454961 [Populus trichocarpa]
Pop_A06G089509	ERH1	AT2G37940	Leaf	Mesophyll cell	10.1093/plcell/koaa060	phosphatidylinositol:ceramide inositolphosphotransferase 1 [Populus trichocarpa]
Pop_A16G028743	SOUL-1	AT2G37970	Leaf	Mesophyll cell	10.1093/plcell/koaa060	PREDICTED: heme-binding-like protein At3g10130, chloroplastic [Populus euphratica]
Pop_A01G056987	RCI4	AT2G38170	Leaf	Mesophyll cell	10.1093/plcell/koaa060	vacuolar cation/proton exchanger 3 [Populus trichocarpa]
Pop_A04G029312	LTP1	AT2G38540	Leaf	Mesophyll cell	10.1038/nature13919	unknown [Populus trichocarpa x Populus deltoides]
Pop_A10G047216	PPL2	AT2G39470	Leaf	Mesophyll cell	10.1038/nature13919	photosynthetic NDH subunit of lumenal location 1, chloroplastic [Populus trichocarpa]
Pop_A10G047216	PPL2	AT2G39470	Leaf	Mesophyll cell	10.1093/plcell/koaa060	photosynthetic NDH subunit of lumenal location 1, chloroplastic [Populus trichocarpa]
Pop_A08G063445	LHCB4.3	AT2G40100	Leaf	Mesophyll cell	10.1093/plcell/koaa060	chlorophyll a-b binding protein CP29.3, chloroplastic [Populus trichocarpa]
Pop_G08G063497	---	AT2G40270	Leaf	Mesophyll cell	10.1093/plcell/koaa060	PREDICTED: inactive receptor-like serine/threonine-protein kinase At2g40270 isoform X2 [Populus euphratica]
Pop_A06G089334	EXPA8	AT2G40610	Leaf	Mesophyll cell	10.1038/nature13919	expansin-A8 [Populus trichocarpa]
Pop_A06G061762	---	AT2G41040	Leaf	Mesophyll cell	10.1093/plcell/koaa060	uncharacterized methyltransferase At2g41040, chloroplastic isoform X1 [Populus trichocarpa]
Pop_A06G062064	---	AT2G41120	Leaf	Mesophyll cell	10.1093/plcell/koaa060	uncharacterized protein LOC7495652 [Populus trichocarpa]
Pop_A06G061968	NTRC	AT2G41680	Leaf	Mesophyll cell	10.1093/plcell/koaa060	PREDICTED: NADPH-dependent thioredoxin reductase 3 [Populus euphratica]
Pop_A06G053663	---	AT2G41950	Leaf	Mesophyll cell	10.1093/plcell/koaa060	uncharacterized protein LOC7479516 [Populus trichocarpa]
Pop_A06G053688	---	AT2G42130	Leaf	Mesophyll cell	10.1093/plcell/koaa060	probable plastid-lipid-associated protein 13, chloroplastic isoform X4 [Populus trichocarpa]
Pop_A02G005374	---	AT2G42975	Leaf	Mesophyll cell	10.1093/plcell/koaa060	uncharacterized protein LOC7468729 [Populus trichocarpa]
Pop_A07G085443	UGT74F2	AT2G43820	Leaf	Mesophyll cell	10.1038/nature13919	UDP-glycosyltransferase 74F2 [Populus trichocarpa]
Pop_A07G085443	UGT74F2	AT2G43820	Leaf	Mesophyll cell	10.1093/plcell/koaa060	UDP-glycosyltransferase 74F2 [Populus trichocarpa]
Pop_A13G010047	---	AT2G43945	Leaf	Mesophyll cell	10.1093/plcell/koaa060	PREDICTED: uncharacterized protein LOC105115692 isoform X1 [Populus euphratica];uncharacterized protein LOC18104222 isoform X1 [Populus trichocarpa]
Pop_A14G000263	---	AT2G44640	Leaf	Mesophyll cell	10.1093/plcell/koaa060	protein TRIGALACTOSYLDIACYLGLYCEROL 4, chloroplastic [Populus trichocarpa]
Pop_A18G012978	---	AT2G45180	Leaf	Mesophyll cell	10.1038/nature13919	PREDICTED: 14 kDa proline-rich protein DC2.15-like [Populus euphratica]
Pop_A01G004574	YAB1	AT2G45190	Leaf	Mesophyll cell	10.1007/978-1-4939-8657-6_9	axial regulator YABBY 1 [Populus trichocarpa]
Pop_A01G004574	YAB1	AT2G45190	Leaf	Mesophyll cell	10.1007/978-1-4939-8657-6_9	axial regulator YABBY 1 [Populus trichocarpa]
Pop_A01G004574	YAB1	AT2G45190	Leaf	Mesophyll cell	10.1007/978-1-4939-8657-6_9	axial regulator YABBY 1 [Populus trichocarpa]
Pop_A02G012268	CHR2	AT2G46020	Leaf	Mesophyll cell	10.1073/pnas.2005626117	ATP-dependent helicase BRM isoform X2 [Populus trichocarpa]
Pop_A01G059838	UBDK GAMMA 4	AT2G46500	Leaf	Mesophyll cell	10.1093/plcell/koaa060	phosphatidylinositol 4-kinase gamma 2 [Populus trichocarpa]
Pop_A02G012495	---	AT2G46910	Leaf	Mesophyll cell	10.1093/plcell/koaa060	probable plastid-lipid-associated protein 10, chloroplastic [Populus trichocarpa]
Pop_A06G061765	CRR6	AT2G47910	Leaf	Mesophyll cell	10.1093/plcell/koaa060	protein CHLORORESPIRATORY REDUCTION 6, chloroplastic isoform X2 [Populus trichocarpa]
Pop_A01G017606	PQL2	AT3G01440	Leaf	Mesophyll cell	10.1038/nature13919	PREDICTED: psbQ-like protein 2, chloroplastic [Populus euphratica]
Pop_A01G017606	PQL2	AT3G01440	Leaf	Mesophyll cell	10.1093/plcell/koaa060	PREDICTED: psbQ-like protein 2, chloroplastic [Populus euphratica]
Pop_A01G058987	PPT2	AT3G01550	Leaf	Mesophyll cell	10.1038/nature13919	phosphoenolpyruvate/phosphate translocator 2, chloroplastic [Populus trichocarpa]
Pop_A01G058987	PPT2	AT3G01550	Leaf	Mesophyll cell	10.1093/plcell/koaa060	phosphoenolpyruvate/phosphate translocator 2, chloroplastic [Populus trichocarpa]
Pop_A04G026370	COL2	AT3G02380	Leaf	Mesophyll cell	10.1093/plcell/koaa060	CONSTANS-like protein [Populus alba x Populus glandulosa]
Pop_A13G011467	---	AT3G04550	Leaf	Mesophyll cell	10.1093/plcell/koaa060	PREDICTED: rubisco accumulation factor 1, chloroplastic [Populus euphratica]
Pop_A05G071804	EMB3119	AT3G04790	Leaf	Mesophyll cell	10.1093/plcell/koaa060	PREDICTED: probable ribose-5-phosphate isomerase 3, chloroplastic [Populus euphratica]
Pop_A05G016934	---	AT3G05936	Leaf	Mesophyll cell	10.1093/plcell/koaa060	PREDICTED: uncharacterized protein LOC105135732 [Populus euphratica]
Pop_A10G001271	---	AT3G06145	Leaf	Mesophyll cell	10.1093/plcell/koaa060	PREDICTED: LOW QUALITY PROTEIN: uncharacterized protein LOC105117159, partial [Populus euphratica]
Pop_A06G089423	---	AT3G08920	Leaf	Mesophyll cell	10.1093/plcell/koaa060	rhodanese-like domain-containing protein 10 [Populus trichocarpa]
Pop_A16G028810	---	AT3G09050	Leaf	Mesophyll cell	10.1093/plcell/koaa060	unknown [Populus trichocarpa x Populus deltoides]
Pop_A06G089497	PTAC13	AT3G09210	Leaf	Mesophyll cell	10.1093/plcell/koaa060	PREDICTED: uncharacterized protein LOC105121984 [Populus euphratica]
Pop_A06G085798	---	AT3G09830	Leaf	Mesophyll cell	10.1093/plcell/koaa060	PREDICTED: probable receptor-like protein kinase At5g47070 isoform X1 [Populus euphratica]
Pop_A16G028700	---	AT3G10060	Leaf	Mesophyll cell	10.1093/plcell/koaa060	PREDICTED: peptidyl-prolyl cis-trans isomerase FKBP16-4, chloroplastic [Populus euphratica]
Pop_A04G059365	LYC	AT3G10230	Leaf	Mesophyll cell	10.1093/plcell/koaa060	PREDICTED: capsanthin/capsorubin synthase, chromoplast-like [Populus euphratica]
Pop_A06G062190	---	AT3G10300	Leaf	Mesophyll cell	10.1093/plcell/koaa060	probable calcium-binding protein CML49 [Populus trichocarpa]
Pop_A08G058053	---	AT3G10405	Leaf	Mesophyll cell	10.1093/plcell/koaa060	PREDICTED: uncharacterized protein LOC105130722 [Populus euphratica]
Pop_A08G057977	LBD21	AT3G11090	Leaf	Mesophyll cell	10.1038/nature13919	PREDICTED: LOB domain-containing protein 21-like [Populus euphratica]
Pop_A06G053582	SYR1	AT3G11820	Leaf	Mesophyll cell	10.1093/plcell/koaa060	syntaxin-121 [Populus trichocarpa]
Pop_A06G053633	PDS2	AT3G11945	Leaf	Mesophyll cell	10.1093/plcell/koaa060	PREDICTED: homogentisate solanesyltransferase, chloroplastic [Populus euphratica]
Pop_A10G069495	---	AT3G12685	Leaf	Mesophyll cell	10.1093/plcell/koaa060	uncharacterized protein LOC18102667 [Populus trichocarpa]
Pop_A01G024813	---	AT3G12930	Leaf	Mesophyll cell	10.1093/plcell/koaa060	protein Iojap, chloroplastic [Populus trichocarpa]
Pop_A01G081135	---	AT3G14420	Leaf	Mesophyll cell	10.1093/plcell/koaa060	peroxisomal (S)-2-hydroxy-acid oxidase [Populus trichocarpa]
Pop_A11G021687	CYP72A8	AT3G14620	Leaf	Mesophyll cell	10.1093/plcell/koaa060	cytochrome P450 CYP72A219 [Populus trichocarpa]
Pop_A01G058797	SWEET2	AT3G14770	Leaf	Mesophyll cell	10.1038/nature13919	bidirectional sugar transporter SWEET2a isoform X2 [Populus trichocarpa];bidirectional sugar transporter SWEET2a isoform X1 [Populus trichocarpa]
Pop_A01G024372	HEME1	AT3G14930	Leaf	Mesophyll cell	10.1093/plcell/koaa060	uroporphyrinogen decarboxylase 1, chloroplastic isoform X2 [Populus trichocarpa]
Pop_A01G081113	---	AT3G15190	Leaf	Mesophyll cell	10.1093/plcell/koaa060	PREDICTED: 30S ribosomal protein S20, chloroplastic [Populus euphratica];30S ribosomal protein S20, chloroplastic [Populus trichocarpa]
Pop_A01G074932	---	AT3G15520	Leaf	Mesophyll cell	10.1093/plcell/koaa060	peptidyl-prolyl cis-trans isomerase CYP37, chloroplastic [Populus trichocarpa]
Pop_A03G049875	---	AT3G15570	Leaf	Mesophyll cell	10.1038/nature13919	root phototropism protein 3 [Populus trichocarpa]
Pop_A01G054715	PIFI	AT3G15840	Leaf	Mesophyll cell	10.1038/nature13919	uncharacterized protein LOC7470544 [Populus trichocarpa]
Pop_A11G032697	JB67	AT3G15850	Leaf	Mesophyll cell	10.1093/plcell/koaa060	palmitoyl-monogalactosyldiacylglycerol delta-7 desaturase, chloroplastic isoform X1 [Populus trichocarpa]
Pop_A01G054727	---	AT3G15900	Leaf	Mesophyll cell	10.1093/plcell/koaa060	PREDICTED: uncharacterized protein LOC105113501 [Populus euphratica]
Pop_A01G032310	PnsB3	AT3G16250	Leaf	Mesophyll cell	10.1038/nature13919	photosynthetic NDH subunit of subcomplex B 3, chloroplastic [Populus trichocarpa]
Pop_A01G032310	PnsB3	AT3G16250	Leaf	Mesophyll cell	10.1093/plcell/koaa060	photosynthetic NDH subunit of subcomplex B 3, chloroplastic [Populus trichocarpa]
Pop_A01G027328	---	AT3G16370	Leaf	Mesophyll cell	10.1038/nature13919	GDSL esterase/lipase APG [Populus trichocarpa]
Pop_A08G063822	RFC3	AT3G17170	Leaf	Mesophyll cell	10.1093/plcell/koaa060	PREDICTED: uncharacterized protein LOC105122164 [Populus euphratica]
Pop_A15G064393	---	AT3G17670	Leaf	Mesophyll cell	10.1093/plcell/koaa060	uncharacterized protein LOC18105613 isoform X1 [Populus trichocarpa];uncharacterized protein LOC18105613 isoform X2 [Populus trichocarpa]
Pop_A15G064315	---	AT3G17930	Leaf	Mesophyll cell	10.1093/plcell/koaa060	uncharacterized protein LOC18105563 [Populus trichocarpa]
Pop_A04G019497	Tic62	AT3G18890	Leaf	Mesophyll cell	10.1093/plcell/koaa060	protein TIC 62, chloroplastic [Populus trichocarpa]
Pop_A05G073387	---	AT3G19800	Leaf	Mesophyll cell	10.1093/plcell/koaa060	hypothetical protein POPTR_005G094700 [Populus trichocarpa]
Pop_A01G017588	NDR1	AT3G20600	Leaf	Mesophyll cell	10.1093/plcell/koaa060	protein NDR1 [Populus trichocarpa]
Pop_A10G046837	PGR7	AT3G21200	Leaf	Mesophyll cell	10.1093/plcell/koaa060	proton gradient regulation 7,PGR7 [Populus tomentosa]
Pop_A02G023907	---	AT3G21670	Leaf	Mesophyll cell	10.1038/nature13919	protein NRT1/ PTR FAMILY 6.4 isoform X1 [Populus trichocarpa]
Pop_A04G018329	---	AT3G21690	Leaf	Mesophyll cell	10.1038/nature13919	PREDICTED: protein TRANSPARENT TESTA 12-like [Populus euphratica]
Pop_A06G062379	---	AT3G21790	Leaf	Mesophyll cell	10.1038/nature13919	anthocyanidin 3-O-glucosyltransferase 6 [Populus trichocarpa]
Pop_A07G036506	CYCP2;1	AT3G21870	Leaf	Mesophyll cell	10.1093/plcell/koaa060	cyclin-U1-1 [Populus trichocarpa]
Pop_A18G018986	HCF101	AT3G24430	Leaf	Mesophyll cell	10.1093/plcell/koaa060	fe-S cluster assembly factor HCF101, chloroplastic [Populus trichocarpa]
Pop_G18G083223	REF1	AT3G24503	Leaf	Mesophyll cell	10.1038/nature13919	aldehyde dehydrogenase family 2 member C4 [Populus trichocarpa]
Pop_A02G065664	PLSP1	AT3G24590	Leaf	Mesophyll cell	10.1093/plcell/koaa060	chloroplast processing peptidase [Populus trichocarpa]
Pop_A02G024036	---	AT3G25480	Leaf	Mesophyll cell	10.1093/plcell/koaa060	rhodanese-like domain-containing protein 4A, chloroplastic [Populus trichocarpa]
Pop_A10G069027	---	AT3G25805	Leaf	Mesophyll cell	10.1093/plcell/koaa060	PREDICTED: uncharacterized protein LOC105113649 [Populus euphratica]
Pop_A07G006319	CYP71B34	AT3G26300	Leaf	Mesophyll cell	10.1038/nature13919	PREDICTED: cytochrome P450 71D9-like [Populus euphratica]
Pop_A01G081716	CCB1	AT3G26710	Leaf	Mesophyll cell	10.1093/plcell/koaa060	protein COFACTOR ASSEMBLY OF COMPLEX C SUBUNIT B CCB1, chloroplastic [Populus trichocarpa]
Pop_A17G081482	SKL1	AT3G26900	Leaf	Mesophyll cell	10.1093/plcell/koaa060	probable inactive shikimate kinase like 1, chloroplastic [Populus trichocarpa]
Pop_A01G032202	YSL6	AT3G27020	Leaf	Mesophyll cell	10.1038/nature13919	probable metal-nicotianamine transporter YSL6 [Populus trichocarpa]
Pop_A01G032248	CLC-B	AT3G27170	Leaf	Mesophyll cell	10.1038/nature13919	chloride channel protein CLC-b [Populus trichocarpa]
Pop_A04G059379	---	AT3G43720	Leaf	Mesophyll cell	10.1038/nature13919	non-specific lipid transfer protein GPI-anchored 2 [Populus trichocarpa]
Pop_A09G076744	---	AT3G44020	Leaf	Mesophyll cell	10.1093/plcell/koaa060	protein disulfide-isomerase LQY1, chloroplastic [Populus trichocarpa]
Pop_A01G029668	LOX2	AT3G45140	Leaf	Mesophyll cell	10.1038/nature13919	linoleate 13S-lipoxygenase 2-1, chloroplastic [Populus trichocarpa]
Pop_A14G029877	---	AT3G46630	Leaf	Mesophyll cell	10.1093/plcell/koaa060	PREDICTED: protein DCL, chloroplastic-like isoform X2 [Populus euphratica]
Pop_A01G056914	PTAC16	AT3G46780	Leaf	Mesophyll cell	10.1093/plcell/koaa060	PREDICTED: protein TIC 62, chloroplastic-like [Populus euphratica]
Pop_A01G004299	PEX11B	AT3G47430	Leaf	Mesophyll cell	10.1038/nature13919	PREDICTED: peroxisomal membrane protein 11B-like [Populus euphratica]
Pop_A01G004299	PEX11B	AT3G47430	Leaf	Mesophyll cell	10.1093/plcell/koaa060	PREDICTED: peroxisomal membrane protein 11B-like [Populus euphratica]
Pop_A01G032225	---	AT3G48200	Leaf	Mesophyll cell	10.1038/nature13919	uncharacterized protein LOC7495787 isoform X1 [Populus trichocarpa]
Pop_A12G068136	CYP71A22	AT3G48310	Leaf	Mesophyll cell	10.1093/plcell/koaa060	cytochrome P450 71A1 [Populus trichocarpa]
Pop_A15G048992	---	AT3G48420	Leaf	Mesophyll cell	10.1038/nature13919	PREDICTED: haloacid dehalogenase-like hydrolase domain-containing protein At3g48420 isoform X1 [Populus euphratica]
Pop_A15G048992	---	AT3G48420	Leaf	Mesophyll cell	10.1093/plcell/koaa060	PREDICTED: haloacid dehalogenase-like hydrolase domain-containing protein At3g48420 isoform X1 [Populus euphratica]
Pop_A12G067962	GSA2	AT3G48730	Leaf	Mesophyll cell	10.1093/plcell/koaa060	hypothetical protein POPTR_015G101100 [Populus trichocarpa]
Pop_A05G073094	ZAR1	AT3G50950	Leaf	Mesophyll cell	10.1093/plcell/koaa060	disease resistance RPP13-like protein 4 [Populus trichocarpa]
Pop_A05G073307	SSL4	AT3G51420	Leaf	Mesophyll cell	10.1038/nature13919	hypothetical protein POPTR_005G099400 [Populus trichocarpa]
Pop_A05G073307	SSL4	AT3G51420	Leaf	Mesophyll cell	10.1093/plcell/koaa060	hypothetical protein POPTR_005G099400 [Populus trichocarpa]
Pop_A06G089405	PDE325	AT3G51820	Leaf	Mesophyll cell	10.1093/plcell/koaa060	chlorophyll synthase, chloroplastic [Populus trichocarpa]
Pop_A06G085812	CP29	AT3G53460	Leaf	Mesophyll cell	10.1093/plcell/koaa060	RNA-binding protein CP29B, chloroplastic [Populus trichocarpa]
Pop_A06G089542	UPP	AT3G53900	Leaf	Mesophyll cell	10.1093/plcell/koaa060	uracil phosphoribosyltransferase [Populus trichocarpa]
Pop_A06G089500	HCEF1	AT3G54050	Leaf	Mesophyll cell	10.1093/plcell/koaa060	high cyclic electron flow 1 [Populus tomentosa]
Pop_A08G063585	PPL1	AT3G55330	Leaf	Mesophyll cell	10.1093/plcell/koaa060	PREDICTED: psbP-like protein 1, chloroplastic [Populus euphratica]
Pop_A19G052918	---	AT3G56290	Leaf	Mesophyll cell	10.1093/plcell/koaa060	uncharacterized protein LOC7455224 [Populus trichocarpa]
Pop_A06G061974	---	AT3G56650	Leaf	Mesophyll cell	10.1093/plcell/koaa060	psbP domain-containing protein 6, chloroplastic [Populus trichocarpa]
Pop_A01G015477	BZIP61	AT3G58120	Leaf	Mesophyll cell	10.1038/nature13919	basic leucine zipper 61 isoform X1 [Populus trichocarpa]
Pop_A13G032484	---	AT3G59780	Leaf	Mesophyll cell	10.1093/plcell/koaa060	PREDICTED: uncharacterized protein LOC105134600 isoform X1 [Populus euphratica]
Pop_A17G052659	---	AT3G59980	Leaf	Mesophyll cell	10.1093/plcell/koaa060	aminoacyl tRNA synthase complex-interacting multifunctional protein 1 [Populus trichocarpa]
Pop_A14G000262	---	AT3G60210	Leaf	Mesophyll cell	10.1093/plcell/koaa060	10 kDa chaperonin 1, chloroplastic [Populus trichocarpa]
Pop_A02G012190	---	AT3G61080	Leaf	Mesophyll cell	10.1093/plcell/koaa060	PREDICTED: protein-ribulosamine 3-kinase, chloroplastic isoform X2 [Populus euphratica]
Pop_A02G012616	CP12-2	AT3G62410	Leaf	Mesophyll cell	10.1038/nature13919	hypothetical protein POPTR_002G196100 [Populus trichocarpa]
Pop_A02G012616	CP12-2	AT3G62410	Leaf	Mesophyll cell	10.1093/plcell/koaa060	hypothetical protein POPTR_002G196100 [Populus trichocarpa]
Pop_A02G012623	---	AT3G62550	Leaf	Mesophyll cell	10.1038/nature13919	PREDICTED: universal stress protein A-like protein [Populus euphratica]
Pop_A02G005427	CSP41A	AT3G63140	Leaf	Mesophyll cell	10.1038/nature13919	chloroplast stem-loop binding protein of 41 kDa a, chloroplastic [Populus trichocarpa]
Pop_A02G005427	CSP41A	AT3G63140	Leaf	Mesophyll cell	10.1093/plcell/koaa060	chloroplast stem-loop binding protein of 41 kDa a, chloroplastic [Populus trichocarpa]
Pop_A02G005435	RRF	AT3G63190	Leaf	Mesophyll cell	10.1093/plcell/koaa060	ribosome-recycling factor, chloroplastic [Populus trichocarpa]
Pop_A14G000137	---	AT4G00165	Leaf	Mesophyll cell	10.1038/nature13919	putative lipid-binding protein At4g00165 [Populus trichocarpa]
Pop_A14G000137	---	AT4G00165	Leaf	Mesophyll cell	10.1093/plcell/koaa060	putative lipid-binding protein At4g00165 [Populus trichocarpa]
Pop_A02G012275	CRCK2	AT4G00330	Leaf	Mesophyll cell	10.1038/nature13919	calmodulin-binding receptor-like cytoplasmic kinase 2 isoform X1 [Populus trichocarpa]
Pop_A02G012275	CRCK2	AT4G00330	Leaf	Mesophyll cell	10.1093/plcell/koaa060	calmodulin-binding receptor-like cytoplasmic kinase 2 isoform X1 [Populus trichocarpa]
Pop_A02G012207	ANL2	AT4G00730	Leaf	Mesophyll cell	10.1038/nature13919	homeobox-leucine zipper protein ANTHOCYANINLESS 2 isoform X1 [Populus trichocarpa]
Pop_A14G044858	---	AT4G01130	Leaf	Mesophyll cell	10.1038/nature13919	GDSL esterase/lipase At4g01130 [Populus trichocarpa]
Pop_A02G012600	---	AT4G01995	Leaf	Mesophyll cell	10.1093/plcell/koaa060	beta-carotene isomerase D27, chloroplastic isoform X2 [Populus trichocarpa]
Pop_A02G031328	RBP-DR1	AT4G03110	Leaf	Mesophyll cell	10.1038/nature13919	PREDICTED: CUGBP Elav-like family member 6 [Populus euphratica]
Pop_A14G000813	---	AT4G03150	Leaf	Mesophyll cell	10.1093/plcell/koaa060	PREDICTED: uncharacterized protein LOC105132050 [Populus euphratica]
Pop_A13G031234	---	AT4G03420	Leaf	Mesophyll cell	10.1093/plcell/koaa060	uncharacterized protein LOC7494424 [Populus trichocarpa]
Pop_A11G026152	RbcX1	AT4G04330	Leaf	Mesophyll cell	10.1038/nature13919	hypothetical protein POPTR_011G010300 [Populus trichocarpa];PREDICTED: uncharacterized protein LOC105109533 [Populus euphratica]
Pop_A11G026152	RbcX1	AT4G04330	Leaf	Mesophyll cell	10.1093/plcell/koaa060	hypothetical protein POPTR_011G010300 [Populus trichocarpa];PREDICTED: uncharacterized protein LOC105109533 [Populus euphratica]
Pop_A04G018290	PDF2	AT4G04890	Leaf	Mesophyll cell	10.1038/nature13919	homeobox-leucine zipper protein MERISTEM L1 [Populus trichocarpa]
Pop_A02G066117	---	AT4G06534	Leaf	Mesophyll cell	10.1038/nature13919	uncharacterized protein LOC18096298 [Populus trichocarpa]
Pop_A05G055946	TL29	AT4G09010	Leaf	Mesophyll cell	10.1093/plcell/koaa060	thylakoid lumenal 29 kDa protein, chloroplastic isoform X1 [Populus trichocarpa]
Pop_A13G082618	NdhT	AT4G09350	Leaf	Mesophyll cell	10.1093/plcell/koaa060	NAD(P)H-quinone oxidoreductase subunit T, chloroplastic [Populus trichocarpa]
Pop_A13G082760	MES12	AT4G09900	Leaf	Mesophyll cell	10.1093/plcell/koaa060	putative methylesterase 14, chloroplastic [Populus trichocarpa]
Pop_A03G014899	OPT7	AT4G10770	Leaf	Mesophyll cell	10.1038/nature13919	oligopeptide transporter 7 [Populus trichocarpa]
Pop_A06G063148	---	AT4G11175	Leaf	Mesophyll cell	10.1093/plcell/koaa060	uncharacterized protein LOC7495709 [Populus trichocarpa]
Pop_A01G059612	CYP706A6	AT4G12320	Leaf	Mesophyll cell	10.1038/nature13919	PREDICTED: geraniol 8-hydroxylase-like [Populus euphratica]
Pop_A01G059612	CYP706A6	AT4G12320	Leaf	Mesophyll cell	10.1093/plcell/koaa060	PREDICTED: geraniol 8-hydroxylase-like [Populus euphratica]
Pop_A14G045556	---	AT4G12830	Leaf	Mesophyll cell	10.1038/nature13919	LOW QUALITY PROTEIN: PsaL domain-containing protein/Abhydrolase_6 domain-containing protein [Cephalotus follicularis]
Pop_A14G045556	---	AT4G12830	Leaf	Mesophyll cell	10.1093/plcell/koaa060	LOW QUALITY PROTEIN: PsaL domain-containing protein/Abhydrolase_6 domain-containing protein [Cephalotus follicularis]
Pop_A02G032983	STOMAGEN	AT4G12970	Leaf	Mesophyll cell	10.1093/plcell/koaa060	0
Pop_A02G032966	---	AT4G13220	Leaf	Mesophyll cell	10.1093/plcell/koaa060	uncharacterized protein LOC7471188 [Populus trichocarpa]
Pop_A08G046242	SECE1	AT4G14870	Leaf	Mesophyll cell	10.1093/plcell/koaa060	preprotein translocase subunit SECE1 [Populus trichocarpa]
Pop_A08G046480	---	AT4G15470	Leaf	Mesophyll cell	10.1093/plcell/koaa060	BI1-like protein [Populus trichocarpa]
Pop_A05G016834	---	AT4G15510	Leaf	Mesophyll cell	10.1093/plcell/koaa060	Photosystem II reaction center PsbP family protein [Populus tomentosa]
Pop_A06G061817	IAGLU	AT4G15550	Leaf	Mesophyll cell	10.1038/nature13919	crocetin glucosyltransferase, chloroplastic [Populus trichocarpa]
Pop_A01G004032	CT-BMY	AT4G17090	Leaf	Mesophyll cell	10.1038/nature13919	beta-amylase 3, chloroplastic [Populus trichocarpa]
Pop_A06G062163	SCL13	AT4G17230	Leaf	Mesophyll cell	10.1093/plcell/koaa060	scarecrow-like protein 13 [Populus trichocarpa]
Pop_A01G003988	---	AT4G17560	Leaf	Mesophyll cell	10.1093/plcell/koaa060	50S ribosomal protein L19, chloroplastic [Populus trichocarpa]
Pop_A01G004002	LIL3:1	AT4G17600	Leaf	Mesophyll cell	10.1093/plcell/koaa060	light-harvesting complex-like protein 3 isotype 1, chloroplastic [Populus trichocarpa]
Pop_A01G004221	PAM68	AT4G19100	Leaf	Mesophyll cell	10.1093/plcell/koaa060	PREDICTED: protein PAM68, chloroplastic isoform X1 [Populus euphratica]
Pop_A07G085391	---	AT4G19530	Leaf	Mesophyll cell	10.1038/nature13919	PREDICTED: LOW QUALITY PROTEIN: TMV resistance protein N-like [Populus euphratica]
Pop_A04G018261	RP1	AT4G21210	Leaf	Mesophyll cell	10.1093/plcell/koaa060	PREDICTED: probable pyruvate, phosphate dikinase regulatory protein, chloroplastic [Populus euphratica]
Pop_A04G018150	---	AT4G21445	Leaf	Mesophyll cell	10.1093/plcell/koaa060	uncharacterized protein LOC7494333 [Populus trichocarpa]
Pop_A04G018122	---	AT4G21570	Leaf	Mesophyll cell	10.1093/plcell/koaa060	transmembrane protein 184C [Populus trichocarpa]
Pop_A01G059955	---	AT4G22830	Leaf	Mesophyll cell	10.1093/plcell/koaa060	uncharacterized protein LOC7478095 [Populus trichocarpa]
Pop_A07G070544	EP1	AT4G23170	Leaf	Mesophyll cell	10.1093/plcell/koaa060	PREDICTED: cysteine-rich receptor-like protein kinase 10 [Populus euphratica]
Pop_A01G067192	RLK4	AT4G23180	Leaf	Mesophyll cell	10.1038/nature13919	cysteine-rich receptor-like protein kinase 10 [Populus tomentosa]
Pop_A01G067192	RLK4	AT4G23180	Leaf	Mesophyll cell	10.1093/plcell/koaa060	cysteine-rich receptor-like protein kinase 10 [Populus tomentosa]
Pop_A14G044789	---	AT4G23470	Leaf	Mesophyll cell	10.1093/plcell/koaa060	uncharacterized protein LOC7494100 isoform X1 [Populus trichocarpa]
Pop_A03G014968	---	AT4G23820	Leaf	Mesophyll cell	10.1038/nature13919	probable polygalacturonase [Populus trichocarpa]
Pop_A01G059820	LACS4	AT4G23850	Leaf	Mesophyll cell	10.1093/plcell/koaa060	long chain acyl-CoA synthetase 4 [Populus trichocarpa]
Pop_A01G059900	---	AT4G24090	Leaf	Mesophyll cell	10.1093/plcell/koaa060	uncharacterized protein LOC7467044 [Populus trichocarpa]
Pop_A12G019309	TAR2	AT4G24670	Leaf	Mesophyll cell	10.1093/plcell/koaa060	tryptophan aminotransferase-related protein 2 isoform X1 [Populus trichocarpa]
Pop_A15G048933	---	AT4G24700	Leaf	Mesophyll cell	10.1093/plcell/koaa060	uncharacterized protein LOC7457777 [Populus trichocarpa]
Pop_A15G048964	---	AT4G24750	Leaf	Mesophyll cell	10.1093/plcell/koaa060	rhodanese-like domain-containing protein 11, chloroplastic isoform X1 [Populus trichocarpa]
Pop_A15G049095	---	AT4G24930	Leaf	Mesophyll cell	10.1093/plcell/koaa060	thylakoid lumenal 17.9 kDa protein, chloroplastic [Populus trichocarpa]
Pop_A01G059728	chy1	AT4G25700	Leaf	Mesophyll cell	10.1093/plcell/koaa060	PREDICTED: beta-carotene 3-hydroxylase 2, chloroplastic-like [Populus euphratica]
Pop_A01G004134	PGP2	AT4G25960	Leaf	Mesophyll cell	10.1038/nature13919	ABC transporter B family member 2 [Populus trichocarpa]
Pop_A03G076458	---	AT4G26370	Leaf	Mesophyll cell	10.1093/plcell/koaa060	uncharacterized protein LOC7463564 [Populus trichocarpa]
Pop_A01G081861	---	AT4G26530	Leaf	Mesophyll cell	10.1038/nature13919	fructose-bisphosphate aldolase 5, cytosolic [Populus trichocarpa]
Pop_A01G081861	---	AT4G26530	Leaf	Mesophyll cell	10.1093/plcell/koaa060	fructose-bisphosphate aldolase 5, cytosolic [Populus trichocarpa]
Pop_A01G058848	FIM1	AT4G26700	Leaf	Mesophyll cell	10.1038/nature13919	fimbrin-1 isoform X1 [Populus trichocarpa]
Pop_G01G024941	FADA	AT4G27030	Leaf	Mesophyll cell	10.1093/plcell/koaa060	fatty acid desaturase 4, chloroplastic [Populus trichocarpa]
Pop_A13G010000	NARA5	AT4G27600	Leaf	Mesophyll cell	10.1093/plcell/koaa060	uncharacterized protein LOC7493902 [Populus trichocarpa]
Pop_A06G064904	---	AT4G28030	Leaf	Mesophyll cell	10.1038/nature13919	uncharacterized protein LOC7465991 isoform X2 [Populus trichocarpa];hypothetical protein POPTR_006G176500 [Populus trichocarpa]
Pop_A06G064904	---	AT4G28030	Leaf	Mesophyll cell	10.1093/plcell/koaa060	uncharacterized protein LOC7465991 isoform X2 [Populus trichocarpa];hypothetical protein POPTR_006G176500 [Populus trichocarpa]
Pop_A06G064871	---	AT4G28080	Leaf	Mesophyll cell	10.1093/plcell/koaa060	protein TSS [Populus trichocarpa]
Pop_A13G031259	EMB1923	AT4G28210	Leaf	Mesophyll cell	10.1093/plcell/koaa060	uncharacterized protein LOC7497399 [Populus trichocarpa]
Pop_A02G032938	GrxC5	AT4G28730	Leaf	Mesophyll cell	10.1038/nature13919	monothiol glutaredoxin-S10 [Populus trichocarpa]
Pop_A18G018916	emb2726	AT4G29060	Leaf	Mesophyll cell	10.1093/plcell/koaa060	PREDICTED: uncharacterized protein LOC105142434 [Populus euphratica]
Pop_A08G006995	---	AT4G29905	Leaf	Mesophyll cell	10.1038/nature13919	hypothetical protein POPTR_T176700 [Populus trichocarpa]
Pop_A06G064841	LPAT1	AT4G30580	Leaf	Mesophyll cell	10.1093/plcell/koaa060	hypothetical protein POPTR_006G183700 [Populus trichocarpa]
Pop_A01G057012	---	AT4G31530	Leaf	Mesophyll cell	10.1093/plcell/koaa060	sanguinarine reductase [Populus trichocarpa]
Pop_A06G063160	VTE1	AT4G32770	Leaf	Mesophyll cell	10.1093/plcell/koaa060	tocopherol cyclase, chloroplastic isoform X1 [Hevea brasiliensis]
Pop_A03G049790	SCABP8	AT4G33000	Leaf	Mesophyll cell	10.1038/nature13919	calcineurin B-like protein 10 isoform X1 [Populus trichocarpa];PREDICTED: calcineurin B-like protein 10 isoform X1 [Populus euphratica]
Pop_A06G053793	GLDP1	AT4G33010	Leaf	Mesophyll cell	10.1093/plcell/koaa060	mitochondrial glycine decarboxylase complex P-protein [Populus tremuloides]
Pop_A06G085737	PME44	AT4G33220	Leaf	Mesophyll cell	10.1038/nature13919	PREDICTED: pectinesterase/pectinesterase inhibitor PPE8B [Populus euphratica]
Pop_A01G054706	PAA1	AT4G33520	Leaf	Mesophyll cell	10.1093/plcell/koaa060	PREDICTED: copper-transporting ATPase PAA1, chloroplastic-like [Populus euphratica]
Pop_A01G010204	---	AT4G34090	Leaf	Mesophyll cell	10.1093/plcell/koaa060	hypothetical protein POPTR_009G099600 [Populus trichocarpa]
Pop_A02G005104	CAT2	AT4G35090	Leaf	Mesophyll cell	10.1093/plcell/koaa060	PREDICTED: catalase isozyme 1-like [Populus euphratica]
Pop_A04G070668	---	AT4G35250	Leaf	Mesophyll cell	10.1093/plcell/koaa060	PREDICTED: uncharacterized protein ycf39-like [Populus euphratica]
Pop_A04G028343	FAH1	AT4G36220	Leaf	Mesophyll cell	10.1038/nature13919	PREDICTED: cytochrome P450 84A1-like [Populus euphratica]
Pop_A01G032069	ALDH3F1	AT4G36250	Leaf	Mesophyll cell	10.1038/nature13919	aldehyde dehydrogenase family 3 member F1 [Populus trichocarpa]
Pop_A07G022621	---	AT4G36390	Leaf	Mesophyll cell	10.1093/plcell/koaa060	CDK5RAP1-like protein [Populus trichocarpa]
Pop_A05G073084	---	AT4G36530	Leaf	Mesophyll cell	10.1093/plcell/koaa060	pheophytinase, chloroplastic [Populus trichocarpa]
Pop_A05G072954	MAP1D	AT4G37040	Leaf	Mesophyll cell	10.1093/plcell/koaa060	methionine aminopeptidase 1D, chloroplastic/mitochondrial isoform X2 [Populus trichocarpa]
Pop_A07G022814	HCF164	AT4G37200	Leaf	Mesophyll cell	10.1093/plcell/koaa060	PREDICTED: thioredoxin-like protein HCF164, chloroplastic isoform X2 [Populus euphratica]
Pop_A02G065643	NdhM	AT4G37925	Leaf	Mesophyll cell	10.1093/plcell/koaa060	PREDICTED: NAD(P)H-quinone oxidoreductase subunit M, chloroplastic-like [Populus euphratica]
Pop_A04G002562	pde191	AT4G38160	Leaf	Mesophyll cell	10.1093/plcell/koaa060	transcription termination factor MTERF6, chloroplastic/mitochondrial [Populus trichocarpa]
Pop_A04G002587	---	AT4G38225	Leaf	Mesophyll cell	10.1093/plcell/koaa060	uncharacterized protein LOC18098162 [Populus trichocarpa]
Pop_A05G056316	SAMT1	AT4G39460	Leaf	Mesophyll cell	10.1093/plcell/koaa060	PREDICTED: S-adenosylmethionine carrier 1, chloroplastic/mitochondrial-like isoform X1 [Populus euphratica]
Pop_A05G072014	PnsL4	AT4G39710	Leaf	Mesophyll cell	10.1038/nature13919	photosynthetic NDH subunit of lumenal location 4, chloroplastic [Populus trichocarpa]
Pop_A05G072014	PnsL4	AT4G39710	Leaf	Mesophyll cell	10.1093/plcell/koaa060	photosynthetic NDH subunit of lumenal location 4, chloroplastic [Populus trichocarpa]
Pop_A06G089644	STN8	AT5G01920	Leaf	Mesophyll cell	10.1093/plcell/koaa060	serine/threonine-protein kinase STN8, chloroplastic isoform X1 [Populus trichocarpa]
Pop_A16G028817	---	AT5G02180	Leaf	Mesophyll cell	10.1038/nature13919	amino acid transporter AVT1D [Populus trichocarpa]
Pop_A06G053433	---	AT5G02710	Leaf	Mesophyll cell	10.1093/plcell/koaa060	PREDICTED: uncharacterized protein LOC105122062 [Populus euphratica]
Pop_A06G085687	---	AT5G03120	Leaf	Mesophyll cell	10.1038/nature13919	uncharacterized protein LOC18100220 [Populus trichocarpa]
Pop_A06G061926	GLUS	AT5G04140	Leaf	Mesophyll cell	10.1093/plcell/koaa060	PREDICTED: ferredoxin-dependent glutamate synthase, chloroplastic isoform X1 [Populus euphratica];ferredoxin-dependent glutamate synthase, chloroplastic isoform X1 [Populus trichocarpa]
Pop_A10G046704	PU1	AT5G04360	Leaf	Mesophyll cell	10.1038/nature13919	PREDICTED: pullulanase 1, chloroplastic isoform X1 [Populus euphratica];PREDICTED: pullulanase 1, chloroplastic isoform X2 [Populus euphratica]
Pop_A08G006944	VTE5	AT5G04490	Leaf	Mesophyll cell	10.1093/plcell/koaa060	probable phytol kinase 1, chloroplastic isoform X2 [Populus trichocarpa]
Pop_A01G057003	FAD8	AT5G05580	Leaf	Mesophyll cell	10.1093/plcell/koaa060	endoplasmic reticulum 18:2 desaturase [Populus tomentosa]
Pop_A08G063437	EGY2	AT5G05740	Leaf	Mesophyll cell	10.1093/plcell/koaa060	probable zinc metalloprotease EGY2, chloroplastic isoform X1 [Populus trichocarpa]
Pop_A06G053553	2CPB	AT5G06290	Leaf	Mesophyll cell	10.1093/plcell/koaa060	2-Cys peroxiredoxin BAS1, chloroplastic [Populus trichocarpa]
Pop_G16G016434	WCRKC1	AT5G06690	Leaf	Mesophyll cell	10.1093/plcell/koaa060	PREDICTED: thioredoxin-like 3-1, chloroplastic isoform X1 [Populus euphratica]
Pop_A08G006870	FTRA2	AT5G08410	Leaf	Mesophyll cell	10.1093/plcell/koaa060	PREDICTED: ferredoxin-thioredoxin reductase, variable chain-like [Populus euphratica]
Pop_A01G032074	DiT1	AT5G12860	Leaf	Mesophyll cell	10.1093/plcell/koaa060	dicarboxylate transporter 1, chloroplastic [Populus trichocarpa]
Pop_A01G074879	---	AT5G13400	Leaf	Mesophyll cell	10.1038/nature13919	protein NRT1/ PTR FAMILY 6.1 isoform X1 [Populus trichocarpa]
Pop_A01G058901	PDF1B	AT5G14660	Leaf	Mesophyll cell	10.1093/plcell/koaa060	peptide deformylase 1B, chloroplastic/mitochondrial isoform X2 [Populus trichocarpa]
Pop_A04G036033	RGP2	AT5G15650	Leaf	Mesophyll cell	10.1093/plcell/koaa060	UDP-arabinopyranose mutase 1 [Populus trichocarpa]
Pop_A13G009874	EMB1241	AT5G17710	Leaf	Mesophyll cell	10.1093/plcell/koaa060	PREDICTED: grpE protein homolog, mitochondrial isoform X2 [Populus euphratica];hypothetical protein POPTR_013G067900 [Populus trichocarpa]
Pop_A09G077047	SAUR24	AT5G18080	Leaf	Mesophyll cell	10.1038/nature13919	PREDICTED: indole-3-acetic acid-induced protein ARG7-like [Populus euphratica]
Pop_A13G009833	---	AT5G18310	Leaf	Mesophyll cell	10.1093/plcell/koaa060	uncharacterized protein LOC7453593 [Populus trichocarpa]
Pop_A08G046041	PCB2	AT5G18660	Leaf	Mesophyll cell	10.1093/plcell/koaa060	divinyl chlorophyllide a 8-vinyl-reductase, chloroplastic [Populus trichocarpa]
Pop_A08G046107	---	AT5G19190	Leaf	Mesophyll cell	10.1038/nature13919	uncharacterized protein LOC7454256 [Populus trichocarpa]
Pop_A08G045816	APL1	AT5G19220	Leaf	Mesophyll cell	10.1093/plcell/koaa060	glucose-1-phosphate adenylyltransferase large subunit 3, chloroplastic/amyloplastic [Populus trichocarpa]
Pop_G09G031629	---	AT5G19370	Leaf	Mesophyll cell	10.1093/plcell/koaa060	rhodanese-like/PpiC domain-containing protein 12, chloroplastic [Populus trichocarpa]
Pop_A01G029593	---	AT5G19850	Leaf	Mesophyll cell	10.1038/nature13919	hypothetical protein POPTR_001G005300 [Populus trichocarpa]
Pop_A01G029593	---	AT5G19850	Leaf	Mesophyll cell	10.1093/plcell/koaa060	hypothetical protein POPTR_001G005300 [Populus trichocarpa]
Pop_A18G083096	---	AT5G20140	Leaf	Mesophyll cell	10.1093/plcell/koaa060	uncharacterized protein LOC18107642 [Populus trichocarpa]
Pop_A06G061675	HHP1	AT5G20270	Leaf	Mesophyll cell	10.1038/nature13919	PREDICTED: probable glycosyltransferase At5g20260 [Populus euphratica]
Pop_A06G079344	GLP3B	AT5G20630	Leaf	Mesophyll cell	10.1038/nature13919	hypothetical protein POPTR_006G142600 [Populus trichocarpa]
Pop_A06G079363	---	AT5G20670	Leaf	Mesophyll cell	10.1093/plcell/koaa060	uncharacterized protein LOC18100323 [Populus trichocarpa]
Pop_G09G026114	---	AT5G20935	Leaf	Mesophyll cell	10.1093/plcell/koaa060	uncharacterized protein LOC7460107 [Populus trichocarpa]
Pop_A06G053360	NdhU	AT5G21430	Leaf	Mesophyll cell	10.1038/nature13919	NAD(P)H-quinone oxidoreductase subunit U, chloroplastic isoform X1 [Populus trichocarpa];NAD(P)H-quinone oxidoreductase subunit U, chloroplastic isoform X2 [Populus trichocarpa]
Pop_A06G053360	NdhU	AT5G21430	Leaf	Mesophyll cell	10.1093/plcell/koaa060	NAD(P)H-quinone oxidoreductase subunit U, chloroplastic isoform X1 [Populus trichocarpa];NAD(P)H-quinone oxidoreductase subunit U, chloroplastic isoform X2 [Populus trichocarpa]
Pop_A06G053377	YLMG2	AT5G21920	Leaf	Mesophyll cell	10.1093/plcell/koaa060	ylmG homolog protein 2, chloroplastic [Populus trichocarpa]
Pop_A04G059354	---	AT5G22340	Leaf	Mesophyll cell	10.1093/plcell/koaa060	hypothetical protein POPTR_004G199000 [Populus trichocarpa]
Pop_A07G006753	HCF136	AT5G23120	Leaf	Mesophyll cell	10.1093/plcell/koaa060	photosystem II stability/assembly factor HCF136, chloroplastic [Populus trichocarpa]
Pop_A01G058999	---	AT5G23240	Leaf	Mesophyll cell	10.1038/nature13919	chaperone protein dnaJ C76, chloroplastic isoform X1 [Populus trichocarpa];chaperone protein dnaJ C76, chloroplastic isoform X2 [Populus trichocarpa]
Pop_A15G064424	SLAH3	AT5G24030	Leaf	Mesophyll cell	10.1126/scisignal.2001346	PREDICTED: S-type anion channel SLAH2-like [Populus euphratica]
Pop_A12G073993	SIGE	AT5G24120	Leaf	Mesophyll cell	10.1093/plcell/koaa060	RNA polymerase sigma factor sigE, chloroplastic/mitochondrial [Populus trichocarpa]
Pop_A14G045010	TIP	AT5G24590	Leaf	Mesophyll cell	10.1093/plcell/koaa060	NAC domain-containing protein 71 isoform X4 [Populus trichocarpa];NAC domain-containing protein 71 isoform X1 [Populus trichocarpa]
Pop_A01G004460	---	AT5G25460	Leaf	Mesophyll cell	10.1038/nature13919	uncharacterized protein LOC7478790 [Populus trichocarpa]
Pop_A04G030644	RD22	AT5G25610	Leaf	Mesophyll cell	10.1038/nature13919	hypothetical protein POPTR_004G136700 [Populus trichocarpa]
Pop_A03G050598	---	AT5G25840	Leaf	Mesophyll cell	10.1038/nature13919	uncharacterized protein LOC7483543 [Populus trichocarpa]
Pop_A13G054241	---	AT5G27290	Leaf	Mesophyll cell	10.1093/plcell/koaa060	PREDICTED: uncharacterized protein LOC105124970 [Populus euphratica]
Pop_A13G054214	---	AT5G27390	Leaf	Mesophyll cell	10.1093/plcell/koaa060	uncharacterized protein LOC7473875 [Populus trichocarpa]
Pop_A13G054148	---	AT5G27560	Leaf	Mesophyll cell	10.1093/plcell/koaa060	PREDICTED: uncharacterized protein LOC105125046 [Populus euphratica]
Pop_A12G019296	PPT	AT5G33320	Leaf	Mesophyll cell	10.1038/nature13919	phosphoenolpyruvate/phosphate translocator 1, chloroplastic [Populus trichocarpa]
Pop_A12G019296	PPT	AT5G33320	Leaf	Mesophyll cell	10.1105/tpc.7.10.1599	phosphoenolpyruvate/phosphate translocator 1, chloroplastic [Populus trichocarpa]
Pop_A13G009949	---	AT5G35970	Leaf	Mesophyll cell	10.1093/plcell/koaa060	PREDICTED: DNA-binding protein SMUBP-2 isoform X1 [Populus euphratica]
Pop_A02G005503	YLMG3	AT5G36120	Leaf	Mesophyll cell	10.1093/plcell/koaa060	protein COFACTOR ASSEMBLY OF COMPLEX C SUBUNIT B CCB3, chloroplastic isoform X1 [Populus trichocarpa]
Pop_A17G052693	---	AT5G36160	Leaf	Mesophyll cell	10.1038/nature13919	probable aminotransferase TAT2 [Populus trichocarpa]
Pop_A13G071225	---	AT5G37360	Leaf	Mesophyll cell	10.1038/nature13919	hypothetical protein POPTR_013G049700 [Populus trichocarpa]
Pop_A13G071225	---	AT5G37360	Leaf	Mesophyll cell	10.1093/plcell/koaa060	hypothetical protein POPTR_013G049700 [Populus trichocarpa]
Pop_A04G029299	GSR 1	AT5G37600	Leaf	Mesophyll cell	10.1093/plcell/koaa060	glutamine synthetase cytosolic isozyme 1 [Populus trichocarpa]
Pop_A06G064769	---	AT5G38420	Leaf	Mesophyll cell	10.1038/nature13919	hypothetical protein POPTR_006G167901 [Populus trichocarpa]
Pop_A19G052886	---	AT5G38520	Leaf	Mesophyll cell	10.1093/plcell/koaa060	unknown [Populus trichocarpa x Populus deltoides]
Pop_A01G081121	---	AT5G39080	Leaf	Mesophyll cell	10.1038/nature13919	phenolic glucoside malonyltransferase 1 [Populus trichocarpa]
Pop_G11G070295	---	AT5G39160	Leaf	Mesophyll cell	10.1038/nature13919	putative germin-like protein 2-1 [Populus trichocarpa]
Pop_A01G081703	GLP2A	AT5G39190	Leaf	Mesophyll cell	10.1038/nature13919	putative germin-like protein 2-1 [Populus trichocarpa]
Pop_A04G036011	CRR7	AT5G39210	Leaf	Mesophyll cell	10.1093/plcell/koaa060	protein CHLORORESPIRATORY REDUCTION 7, chloroplastic [Populus trichocarpa]
Pop_A01G059021	CRK42	AT5G40380	Leaf	Mesophyll cell	10.1038/nature13919	cysteine-rich receptor-like protein kinase 42 [Populus trichocarpa]
Pop_A01G032193	---	AT5G41050	Leaf	Mesophyll cell	10.1093/plcell/koaa060	major pollen allergen Ole e 1 [Populus trichocarpa]
Pop_A01G059846	---	AT5G42070	Leaf	Mesophyll cell	10.1093/plcell/koaa060	PREDICTED: uncharacterized protein LOC105127308 [Populus euphratica]
Pop_A02G005057	---	AT5G42250	Leaf	Mesophyll cell	10.1093/plcell/koaa060	alcohol dehydrogenase-like 7 isoform X1 [Populus trichocarpa]
Pop_A02G005079	VAR1	AT5G42270	Leaf	Mesophyll cell	10.1093/plcell/koaa060	Cell division protein ftsH [Populus tomentosa]
Pop_A10G047253	PnsB5	AT5G43750	Leaf	Mesophyll cell	10.1093/plcell/koaa060	PREDICTED: uncharacterized protein LOC105129992 [Populus euphratica]
Pop_A01G074741	Y3IP1	AT5G44650	Leaf	Mesophyll cell	10.1093/plcell/koaa060	PREDICTED: uncharacterized protein LOC105113655 [Populus euphratica]
Pop_A15G084250	CYTC6A	AT5G45040	Leaf	Mesophyll cell	10.1093/plcell/koaa060	hypothetical protein POPTR_015G121201 [Populus trichocarpa]
Pop_A04G010823	---	AT5G45280	Leaf	Mesophyll cell	10.1038/nature13919	pectin acetylesterase 11 [Populus trichocarpa]
Pop_A11G056684	SnRK3.6	AT5G45820	Leaf	Mesophyll cell	10.1093/plcell/koaa060	CBL-interacting protein kinase 11 [Populus trichocarpa]
Pop_A04G019634	CHLI2	AT5G45930	Leaf	Mesophyll cell	10.1093/plcell/koaa060	magnesium-chelatase subunit ChlI, chloroplastic [Populus trichocarpa]
Pop_A04G019616	---	AT5G45950	Leaf	Mesophyll cell	10.1038/nature13919	GDSL esterase/lipase At5g45950 [Populus trichocarpa]
Pop_A01G025042	---	AT5G47610	Leaf	Mesophyll cell	10.1038/nature13919	RING-H2 finger protein ATL79 [Populus trichocarpa]
Pop_A14G045473	---	AT5G48220	Leaf	Mesophyll cell	10.1093/plcell/koaa060	indole-3-glycerol phosphate synthase, chloroplastic [Populus trichocarpa]
Pop_A02G024034	BIR1	AT5G48380	Leaf	Mesophyll cell	10.1093/plcell/koaa060	probably inactive leucine-rich repeat receptor-like protein kinase At5g48380 [Populus trichocarpa]
Pop_A09G026597	---	AT5G48490	Leaf	Mesophyll cell	10.1093/plcell/koaa060	hypothetical protein POPTR_009G112500 [Populus trichocarpa]
Pop_A03G050303	---	AT5G48790	Leaf	Mesophyll cell	10.1093/plcell/koaa060	protein LOW PSII ACCUMULATION 3, chloroplastic [Populus trichocarpa]
Pop_A01G074792	FRO6	AT5G49730	Leaf	Mesophyll cell	10.1038/nature13919	ferric reductase-like transmembrane component family protein [Populus tomentosa]
Pop_A01G074792	FRO6	AT5G49730	Leaf	Mesophyll cell	10.1093/plcell/koaa060	ferric reductase-like transmembrane component family protein [Populus tomentosa]
Pop_A03G049682	---	AT5G49760	Leaf	Mesophyll cell	10.1038/nature13919	hypothetical protein POPTR_004G232500 [Populus trichocarpa]
Pop_A12G068140	WR3	AT5G50200	Leaf	Mesophyll cell	10.1093/plcell/koaa060	high-affinity nitrate transporter 3.1 [Populus trichocarpa]
Pop_A01G074849	---	AT5G50915	Leaf	Mesophyll cell	10.1093/plcell/koaa060	PREDICTED: transcription factor bHLH63-like [Populus euphratica]
Pop_A12G007833	LPA2	AT5G51545	Leaf	Mesophyll cell	10.1093/plcell/koaa060	PREDICTED: protein LOW PSII ACCUMULATION 2, chloroplastic-like [Populus euphratica]
Pop_A15G014791	CRR1	AT5G52100	Leaf	Mesophyll cell	10.1093/plcell/koaa060	Chlororespiration reduction 1 [Populus tomentosa]
Pop_A04G029157	---	AT5G52780	Leaf	Mesophyll cell	10.1038/nature13919	uncharacterized protein PAM68-like [Populus trichocarpa]
Pop_A04G029157	---	AT5G52780	Leaf	Mesophyll cell	10.1093/plcell/koaa060	uncharacterized protein PAM68-like [Populus trichocarpa]
Pop_A07G085225	TAT7	AT5G53970	Leaf	Mesophyll cell	10.1038/nature13919	PREDICTED: probable aminotransferase TAT2 [Populus euphratica]
Pop_A01G075075	HLM1	AT5G54250	Leaf	Mesophyll cell	10.1038/nature13919	PREDICTED: cyclic nucleotide-gated ion channel 4 [Populus euphratica]
Pop_A15G017058	---	AT5G55220	Leaf	Mesophyll cell	10.1093/plcell/koaa060	PREDICTED: trigger factor-like protein TIG, Chloroplastic [Populus euphratica]
Pop_A06G053794	GNC	AT5G56860	Leaf	Mesophyll cell	10.1038/nature13919	cytokinin-responsive gata factor 1 [Populus tomentosa]
Pop_A06G064897	YRE	AT5G57800	Leaf	Mesophyll cell	10.1038/nature13919	protein ECERIFERUM 3 isoform X1 [Populus trichocarpa]
Pop_A06G064836	emb1629	AT5G57930	Leaf	Mesophyll cell	10.1093/plcell/koaa060	APO protein 2, chloroplastic isoform X1 [Populus trichocarpa]
Pop_A04G002558	PHOT2	AT5G58140	Leaf	Mesophyll cell	10.1038/nature13919	phototropin-2 isoform X2 [Populus trichocarpa]
Pop_A13G031208	EMB3143	AT5G58250	Leaf	Mesophyll cell	10.1093/plcell/koaa060	uncharacterized protein LOC7465197 [Populus trichocarpa]
Pop_A13G031203	NdhN	AT5G58260	Leaf	Mesophyll cell	10.1038/nature13919	NAD(P)H-quinone oxidoreductase subunit N, chloroplastic [Populus trichocarpa]
Pop_A13G031203	NdhN	AT5G58260	Leaf	Mesophyll cell	10.1093/plcell/koaa060	NAD(P)H-quinone oxidoreductase subunit N, chloroplastic [Populus trichocarpa]
Pop_A09G014426	---	AT5G58720	Leaf	Mesophyll cell	10.1093/plcell/koaa060	SMR domain-containing protein At5g58720 [Populus trichocarpa]
Pop_A01G056928	COPT1	AT5G59030	Leaf	Mesophyll cell	10.1038/nature13919	PREDICTED: copper transporter 1-like [Populus euphratica]
Pop_A15G017270	---	AT5G61350	Leaf	Mesophyll cell	10.1038/nature13919	PREDICTED: probable receptor-like protein kinase At5g61350 [Populus euphratica]
Pop_A12G007912	---	AT5G62140	Leaf	Mesophyll cell	10.1093/plcell/koaa060	uncharacterized protein LOC7482114 [Populus trichocarpa]
Pop_A12G019249	---	AT5G62570	Leaf	Mesophyll cell	10.1093/plcell/koaa060	calmodulin-binding protein 60 A isoform X1 [Populus trichocarpa]
Pop_A15G017053	---	AT5G62720	Leaf	Mesophyll cell	10.1093/plcell/koaa060	uncharacterized protein LOC7474840 [Populus trichocarpa]
Pop_A15G017149	---	AT5G62840	Leaf	Mesophyll cell	10.1093/plcell/koaa060	uncharacterized protein LOC7457726 [Populus trichocarpa]
Pop_A15G017195	---	AT5G63060	Leaf	Mesophyll cell	10.1093/plcell/koaa060	CRAL-TRIO domain-containing protein C3H8.02 isoform X1 [Populus trichocarpa]
Pop_A05G071623	MUM2	AT5G63800	Leaf	Mesophyll cell	10.1038/nature13919	hypothetical protein POPTR_005G069200 [Populus trichocarpa]
Pop_A01G005980	---	AT5G64460	Leaf	Mesophyll cell	10.1038/nature13919	phosphoglycerate mutase-like protein 1 isoform X2 [Populus trichocarpa];hypothetical protein [Populus tomentosa]
Pop_A01G005980	---	AT5G64460	Leaf	Mesophyll cell	10.1093/plcell/koaa060	phosphoglycerate mutase-like protein 1 isoform X2 [Populus trichocarpa];hypothetical protein [Populus tomentosa]
Pop_G05G073586	RGF9	AT5G64770	Leaf	Mesophyll cell	10.1038/nature13919	hypothetical protein POPTR_005G087000 [Populus trichocarpa]
Pop_A05G073613	GCN5	AT5G64840	Leaf	Mesophyll cell	10.1093/plcell/koaa060	PREDICTED: ABC transporter F family member 5-like [Populus euphratica]
Pop_A02G088647	---	AT5G65380	Leaf	Mesophyll cell	10.1038/nature13919	protein DETOXIFICATION 27 [Populus trichocarpa]
Pop_A02G088647	---	AT5G65380	Leaf	Mesophyll cell	10.1093/plcell/koaa060	protein DETOXIFICATION 27 [Populus trichocarpa]
Pop_A07G022568	---	AT5G66530	Leaf	Mesophyll cell	10.1093/plcell/koaa060	putative glucose-6-phosphate 1-epimerase [Populus trichocarpa]
Pop_A07G011972	---	AT5G67370	Leaf	Mesophyll cell	10.1093/plcell/koaa060	protein CONSERVED IN THE GREEN LINEAGE AND DIATOMS 27, chloroplastic isoform X1 [Populus trichocarpa]
Pop_A07G011966	---	AT5G67385	Leaf	Mesophyll cell	10.1038/nature13919	BTB/POZ domain-containing protein SR1IP1 [Populus trichocarpa]
Pop_A05G073145	WUS1	AT2G17950	Shoot apical	Organizing center	10.1016/S0092-8674(03)00312-X	WUSa [Populus tomentosa]
Pop_A05G073145	WUS1	AT2G17950	Shoot apical	Organizing center	10.1016/j.pbi.2014.11.002	WUSa [Populus tomentosa]
Pop_A02G032953	RPT2a	AT4G29040	Shoot apical	Organizing center	10.1242/dev.01096	26S proteasome regulatory subunit 4 homolog A [Populus trichocarpa]
Pop_A08G086509	TPS6	AT1G68020	Leaf	Pavement cell	10.1104/pp.107.107441	PREDICTED: alpha,alpha-trehalose-phosphate synthase [UDP-forming] 6-like [Populus euphratica]
Pop_A08G046241	MUTE	AT3G06120	Leaf	Pavement cell	10.1111/tpj.12244	transcription factor MUTE [Populus trichocarpa]
Pop_A01G054597	IQD5	AT3G22190	Leaf	Pavement cell	10.1093/jxb/ery395	protein IQ-DOMAIN 1 isoform X2 [Populus trichocarpa];protein IQ-DOMAIN 1 isoform X1 [Populus trichocarpa]
Pop_A01G054597	IQD5	AT3G22190	Leaf	Pavement cell	10.1104/pp.18.00558	protein IQ-DOMAIN 1 isoform X2 [Populus trichocarpa];protein IQ-DOMAIN 1 isoform X1 [Populus trichocarpa]
Pop_A01G056968	---	AT1G07300	Leaf	Phloem	10.1093/plcell/koaa060	hypothetical protein POPTR_001G249500 [Populus trichocarpa]
Pop_A05G016789	NAS3	AT1G09240	Leaf	Phloem	10.1093/plcell/koaa060	nicotianamine synthase-like [Populus trichocarpa]
Pop_A12G027523	PP2-A10	AT1G10155	Leaf	Phloem	10.1093/plcell/koaa060	PREDICTED: protein PHLOEM PROTEIN 2-LIKE A9-like isoform X1 [Populus euphratica]
Pop_A07G006525	---	AT1G10380	Leaf	Phloem	10.1093/plcell/koaa060	wall-associated receptor kinase-like 15 [Populus trichocarpa]
Pop_A01G059966	CCS	AT1G12520	Leaf	Phloem	10.1093/plcell/koaa060	copper chaperone for superoxide dismutase, chloroplastic/cytosolic [Populus trichocarpa]
Pop_A01G080045	NRAMP6	AT1G15960	Leaf	Phloem	10.1093/plcell/koaa060	PREDICTED: metal transporter Nramp6-like [Populus euphratica]
Pop_A05G001913	---	AT1G19715	Leaf	Phloem	10.1093/plcell/koaa060	jacalin-related lectin 3 isoform X1 [Populus trichocarpa]
Pop_A02G065582	SWEET1	AT1G21460	Leaf	Phloem	10.1038/nature09606	PREDICTED: bidirectional sugar transporter SWEET1-like [Populus euphratica]
Pop_A02G088540	SULTR1;3	AT1G22150	Shoot apical	Phloem	10.1046/j.1365-313x.2000.00768.x	PREDICTED: sulfate transporter 1.2-like [Populus euphratica]
Pop_A13G082683	SUT1	AT1G22710	Leaf	Phloem	10.1038/nature02100	sucrose transporter 1 [Populus trichocarpa]
Pop_A13G082683	SUT1	AT1G22710	Leaf	Phloem	10.1002/j.1460-2075.1994.tb06229.x	sucrose transporter 1 [Populus trichocarpa]
Pop_A13G082683	SUT1	AT1G22710	Leaf	Phloem	10.1093/plcell/koaa060	sucrose transporter 1 [Populus trichocarpa]
Pop_A13G082683	SUT1	AT1G22710	Shoot apical	Phloem	10.1111/j.1438-8677.1996.tb00577.x	sucrose transporter 1 [Populus trichocarpa]
Pop_A04G019605	VOZ1	AT1G28520	Leaf	Phloem	10.1093/plcell/koaa060	transcription factor VOZ1 isoform X1 [Populus trichocarpa]
Pop_A04G018276	RUB1	AT1G31340	Leaf	Phloem	10.1093/plcell/koaa060	hypothetical protein POPTR_004G021600 [Populus trichocarpa]
Pop_A01G025096	CID11	AT1G32790	Leaf	Phloem	10.1093/plcell/koaa060	PREDICTED: polyadenylate-binding protein-interacting protein 11-like isoform X1 [Populus euphratica]
Pop_A07G085211	SPL4	AT1G53160	Leaf	Phloem	10.1093/plcell/koaa060	PREDICTED: squamosa promoter-binding protein 2-like isoform X1 [Populus euphratica]
Pop_A05G072068	LOX1	AT1G55020	Leaf	Phloem	10.1093/plcell/koaa060	probable linoleate 9S-lipoxygenase 5 isoform X2 [Populus trichocarpa]
Pop_A10G069390	---	AT1G69510	Leaf	Phloem	10.1093/plcell/koaa060	uncharacterized protein LOC7481577 isoform X1 [Populus trichocarpa]
Pop_A08G063646	CLE45	AT1G69588	Leaf	Phloem	10.1073/pnas.1407337111	hypothetical protein [Populus tomentosa]
Pop_A08G063646	CLE45	AT1G69588	Leaf	Phloem	10.1016/j.cub.2019.12.043	hypothetical protein [Populus tomentosa]
Pop_A02G004900	RSM3	AT1G75250	Leaf	Phloem	10.1093/plcell/koaa060	protein RADIALIS-like 3 [Populus trichocarpa]
Pop_A02G004973	FLO5	AT1G75820	Leaf	Phloem	10.1093/plcell/koaa060	receptor protein kinase-1 [Populus tomentosa]
Pop_A02G005046	ATAMY2	AT1G76130	Leaf	Phloem	10.1093/plcell/koaa060	probable alpha-amylase 2 [Populus trichocarpa]
Pop_A08G063611	WDY	AT1G79430	Leaf	Phloem	10.1038/nature02100	PREDICTED: myb family transcription factor APL [Populus euphratica]
Pop_A08G063611	WDY	AT1G79430	Leaf	Phloem	10.1038/nature02100	PREDICTED: myb family transcription factor APL [Populus euphratica]
Pop_A08G063611	WDY	AT1G79430	Leaf	Phloem	10.1093/plcell/koaa060	PREDICTED: myb family transcription factor APL [Populus euphratica]
Pop_A02G065673	PMIT1	AT1G80830	Leaf	Phloem	10.1093/plcell/koaa060	metal transporter Nramp5 [Populus trichocarpa]
Pop_A08G064083	PDE345	AT2G01140	Leaf	Phloem	10.1093/plcell/koaa060	fructose-bisphosphate aldolase 3, chloroplastic [Populus trichocarpa]
Pop_A04G019485	---	AT2G16050	Leaf	Phloem	10.1093/plcell/koaa060	uncharacterized protein LOC7461188 [Populus trichocarpa]
Pop_A02G005146	PAP10	AT2G16430	Leaf	Phloem	10.1093/plcell/koaa060	PREDICTED: purple acid phosphatase 2-like isoform X1 [Populus euphratica]
Pop_A05G073177	HK1	AT2G17820	Leaf	Phloem	10.1093/plcell/koaa060	histidine aspartate kinase 1b [Populus x canadensis]
Pop_A07G022704	PFK5	AT2G22480	Leaf	Phloem	10.1093/plcell/koaa060	ATP-dependent 6-phosphofructokinase 5, chloroplastic [Populus trichocarpa]
Pop_A06G064880	---	AT2G23950	Leaf	Phloem	10.1093/plcell/koaa060	probable LRR receptor-like serine/threonine-protein kinase At4g30520 [Populus trichocarpa]
Pop_A18G013138	---	AT2G25950	Leaf	Phloem	10.1093/plcell/koaa060	PITH domain-containing protein 1 [Populus trichocarpa]
Pop_A06G061634	YAB5	AT2G26580	Leaf	Phloem	10.1093/plcell/koaa060	axial regulator YABBY 5 [Populus trichocarpa]
Pop_A04G059332	NLP1	AT2G27450	Leaf	Phloem	10.1093/plcell/koaa060	N-carbamoylputrescine amidase [Populus trichocarpa]
Pop_A01G056852	PLL4	AT2G28890	Leaf	Phloem	10.1093/plcell/koaa060	probable protein phosphatase 2C 23 [Populus trichocarpa]
Pop_A02G005130	GLTP1	AT2G33470	Leaf	Phloem	10.1093/plcell/koaa060	glycolipid transfer protein 1 [Populus trichocarpa]
Pop_A12G019275	---	AT2G36330	Leaf	Phloem	10.1093/plcell/koaa060	CASP-like protein 4A3 isoform X1 [Populus trichocarpa]
Pop_A06G053428	ALS3	AT2G37330	Leaf	Phloem	10.1093/plcell/koaa060	protein ALUMINUM SENSITIVE 3 [Populus trichocarpa]
Pop_A01G080061	SUVR4	AT3G04380	Leaf	Phloem	10.1093/plcell/koaa060	0
Pop_A08G002389	TET6	AT3G12090	Leaf	Phloem	10.1093/plcell/koaa060	tetraspanin-6 [Populus trichocarpa]
Pop_A01G024396	PPC3	AT3G14940	Leaf	Phloem	10.1093/plcell/koaa060	phosphoenolpyruvate carboxylase, housekeeping isozyme [Populus trichocarpa]
Pop_A10G001218	HYH	AT3G17609	Leaf	Phloem	10.1093/plcell/koaa060	transcription factor HY5-like isoform X1 [Populus trichocarpa]
Pop_A08G009140	---	AT3G21460	Leaf	Phloem	10.1093/plcell/koaa060	PREDICTED: monothiol glutaredoxin-S10 [Populus euphratica]
Pop_A05G071926	AHP1	AT3G21510	Leaf	Phloem	10.1093/plcell/koaa060	histidine-containing phosphotransfer protein 1 [Populus trichocarpa]
Pop_A01G058889	SWEET4	AT3G28007	Leaf	Phloem	10.1038/nature09606	bidirectional sugar transporter SWEET6a [Populus trichocarpa]
Pop_A08G063389	---	AT3G55646	Leaf	Phloem	10.1093/plcell/koaa060	uncharacterized protein LOC7494463 isoform X4 [Populus trichocarpa];uncharacterized protein LOC7494463 isoform X2 [Populus trichocarpa]
Pop_A14G045359	---	AT3G58720	Leaf	Phloem	10.1093/plcell/koaa060	E3 ubiquitin-protein ligase RNF165 isoform X2 [Populus trichocarpa]
Pop_A02G031368	---	AT3G62930	Leaf	Phloem	10.1093/plcell/koaa060	monothiol glutaredoxin-S6 [Populus trichocarpa]
Pop_A02G031372	---	AT3G62950	Leaf	Phloem	10.1093/plcell/koaa060	glutaredoxin-C11 [Populus trichocarpa]
Pop_A14G045348	IPT3	AT3G63110	Leaf	Phloem	10.1093/plcell/koaa060	adenylate isopentenyltransferase 3, chloroplastic [Populus trichocarpa]
Pop_A15G076625	---	AT4G00880	Leaf	Phloem	10.1093/plcell/koaa060	auxin-responsive protein SAUR32 [Populus trichocarpa]
Pop_A02G086838	---	AT4G02370	Leaf	Phloem	10.1093/plcell/koaa060	PREDICTED: uncharacterized protein At5g01610-like [Populus euphratica]
Pop_A02G086835	SAG21	AT4G02380	Leaf	Phloem	10.1093/plcell/koaa060	late embryogenesis abundant protein 5 [Populus suaveolens]
Pop_A01G015502	RFNR1	AT4G05390	Leaf	Phloem	10.1093/plcell/koaa060	heterotrophic ferredoxin NADP+ oxidoreductase [Populus tremula x Populus tremuloides]
Pop_A08G046102	bHLH104	AT4G14410	Leaf	Phloem	10.1093/plcell/koaa060	transcription factor bHLH104 isoform X2 [Populus trichocarpa]
Pop_A06G062173	INT4	AT4G16480	Leaf	Phloem	10.1093/plcell/koaa060	inositol transporter 4 [Populus trichocarpa]
Pop_A01G003955	---	AT4G16790	Leaf	Phloem	10.1093/plcell/koaa060	uncharacterized protein DDB_G0284459 [Populus trichocarpa]
Pop_A12G027522	PP2-A1	AT4G19840	Leaf	Phloem	10.1093/plcell/koaa060	PREDICTED: protein PHLOEM PROTEIN 2-LIKE A1-like [Populus euphratica]
Pop_A01G059901	YSL1	AT4G24120	Leaf	Phloem	10.1093/plcell/koaa060	metal-nicotianamine transporter YSL1 isoform X1 [Populus trichocarpa]
Pop_A02G066111	WRKY7	AT4G24240	Leaf	Phloem	10.1093/plcell/koaa060	WRKY transcription factor 14 [(Populus tomentosa x Populus bolleana) x Populus tomentosa]
Pop_A02G033068	IAA11	AT4G28640	Leaf	Phloem	10.1093/plcell/koaa060	auxin-responsive protein IAA11 isoform X1 [Populus trichocarpa];auxin-responsive protein IAA11 isoform X2 [Populus trichocarpa]
Pop_A06G053429	---	AT4G32870	Leaf	Phloem	10.1093/plcell/koaa060	PREDICTED: lachrymatory-factor synthase [Populus euphratica]
Pop_A01G010340	---	AT4G33780	Leaf	Phloem	10.1093/plcell/koaa060	protein SHORT HYPOCOTYL IN WHITE LIGHT 1 [Populus trichocarpa]
Pop_A09G077020	ROC1	AT4G38740	Leaf	Phloem	10.1093/plcell/koaa060	peptidyl-prolyl cis-trans isomerase 1 [Populus trichocarpa]
Pop_A16G089965	---	AT5G01750	Leaf	Phloem	10.1093/plcell/koaa060	protein LURP-one-related 15 [Populus trichocarpa]
Pop_A08G063417	---	AT5G05790	Leaf	Phloem	10.1093/plcell/koaa060	MYB family protein [Populus trichocarpa]
Pop_A06G061781	---	AT5G06850	Leaf	Phloem	10.1093/plcell/koaa060	FT-interacting protein 1 [Populus trichocarpa]
Pop_A05G071627	AAP2	AT5G09220	Leaf	Phloem	10.1105/tpc.110.073833	hypothetical protein [Populus tomentosa]
Pop_A05G071627	AAP2	AT5G09220	Leaf	Phloem	10.1093/plcell/koaa060	hypothetical protein [Populus tomentosa]
Pop_A05G071681	MIPS3	AT5G10170	Leaf	Phloem	10.1093/plcell/koaa060	inositol-3-phosphate synthase [Populus trichocarpa]
Pop_A05G071659	SULTR2;1	AT5G10180	Shoot apical	Phloem	10.1104/pp.014712	hypothetical protein POPTR_005G079000 [Populus trichocarpa]
Pop_A06G063229	TED 5	AT5G11260	Leaf	Phloem	10.1093/plcell/koaa060	transcription factor HY5 [Populus trichocarpa]
Pop_A01G074874	---	AT5G13420	Leaf	Phloem	10.1093/plcell/koaa060	PREDICTED: uncharacterized protein LOC105133779 [Populus euphratica]
Pop_A01G002206	---	AT5G14500	Leaf	Phloem	10.1093/plcell/koaa060	putative glucose-6-phosphate 1-epimerase isoform X2 [Populus trichocarpa]
Pop_A17G020630	SPX4	AT5G15330	Leaf	Phloem	10.1093/plcell/koaa060	SPX domain-containing protein 4 isoform X1 [Populus trichocarpa]
Pop_A18G018932	ASP2	AT5G19550	Leaf	Phloem	10.1093/plcell/koaa060	aspartate aminotransferase, cytoplasmic [Populus trichocarpa]
Pop_A06G061516	---	AT5G20700	Leaf	Phloem	10.1093/plcell/koaa060	uncharacterized protein LOC7487223 isoform X2 [Populus trichocarpa]
Pop_A01G054592	---	AT5G22090	Leaf	Phloem	10.1093/plcell/koaa060	protein FAF-like, chloroplastic [Populus trichocarpa]
Pop_A15G049137	SWEET12	AT5G23660	Leaf	Phloem	10.1126/science.1213351	bidirectional sugar transporter SWEET12 [Populus trichocarpa]
Pop_A13G011504	PHL1	AT5G29000	Leaf	Phloem	10.1093/plcell/koaa060	PREDICTED: protein PHR1-LIKE 1-like isoform X1 [Populus euphratica]
Pop_A04G026345	---	AT5G38710	Leaf	Phloem	10.1093/plcell/koaa060	proline dehydrogenase 2, mitochondrial [Populus trichocarpa]
Pop_A01G059010	GRXC2	AT5G40370	Leaf	Phloem	10.1093/plcell/koaa060	PREDICTED: glutaredoxin [Populus euphratica]
Pop_A01G058622	---	AT5G40690	Leaf	Phloem	10.1093/plcell/koaa060	uncharacterized protein LOC7467690 [Populus trichocarpa]
Pop_G01G090338	---	AT5G40960	Leaf	Phloem	10.1093/plcell/koaa060	uncharacterized protein LOC7495794 [Populus trichocarpa]
Pop_A04G070719	---	AT5G42146	Leaf	Phloem	10.1093/plcell/koaa060	hypothetical protein POPTR_004G167800 [Populus trichocarpa]
Pop_A01G079891	---	AT5G43150	Leaf	Phloem	10.1093/plcell/koaa060	hypothetical protein POPTR_001G037400 [Populus trichocarpa]
Pop_A14G090616	PCS1	AT5G44070	Leaf	Phloem	10.1093/plcell/koaa060	PREDICTED: glutathione gamma-glutamylcysteinyltransferase 1-like [Populus euphratica]
Pop_G02G005686	XIP1	AT5G49660	Leaf	Phloem	10.1093/plcell/koaa060	receptor protein-tyrosine kinase CEPR1 [Populus trichocarpa]
Pop_A12G068137	SUFE3	AT5G50210	Leaf	Phloem	10.1093/plcell/koaa060	hypothetical protein POPTR_012G089500 [Populus trichocarpa]
Pop_A12G067978	HVA22E	AT5G50720	Leaf	Phloem	10.1093/plcell/koaa060	HVA22-like protein e [Populus trichocarpa]
Pop_A04G029149	WRKY27	AT5G52830	Leaf	Phloem	10.1093/plcell/koaa060	probable WRKY transcription factor 27 [Populus trichocarpa]
Pop_A12G067104	---	AT5G54130	Leaf	Phloem	10.1093/plcell/koaa060	uncharacterized calcium-binding protein At1g02270 isoform X1 [Populus trichocarpa];uncharacterized calcium-binding protein At1g02270 isoform X2 [Populus trichocarpa]
Pop_A01G069907	GPT1	AT5G54800	Leaf	Phloem	10.1093/plcell/koaa060	PREDICTED: glucose-6-phosphate/phosphate translocator 1, chloroplastic isoform X2 [Populus euphratica]
Pop_A06G053749	---	AT5G56530	Leaf	Phloem	10.1093/plcell/koaa060	hypothetical protein POPTR_006G233600 [Populus trichocarpa]
Pop_A09G014383	---	AT5G58900	Leaf	Phloem	10.1093/plcell/koaa060	transcription factor DIVARICATA [Populus trichocarpa]
Pop_A09G014511	---	AT5G59080	Leaf	Phloem	10.1093/plcell/koaa060	hypothetical protein Potri.009G038300 [Populus tomentosa]
Pop_A01G054792	ATADF4	AT5G59890	Leaf	Phloem	10.1093/plcell/koaa060	actin-depolymerizing factor 2 [Populus trichocarpa]
Pop_A12G068174	IPK2BETA	AT5G61760	Leaf	Phloem	10.1093/plcell/koaa060	inositol polyphosphate multikinase alpha [Populus trichocarpa]
Pop_A05G073493	TGA1	AT5G65210	Leaf	Phloem	10.1093/plcell/koaa060	TGA transcription factor 1 [Populus tremula x Populus alba]
Pop_A02G005515	PDF1	AT2G42840	Shoot apical	Protoderm of floral organ primordium	10.1093/oxfordjournals.pcp.a029579	protodermal factor 1 [Populus trichocarpa]
Pop_A02G005515	PDF1	AT2G42840	Shoot apical	Protoderm of leaf primordium	10.1093/oxfordjournals.pcp.a029579	protodermal factor 1 [Populus trichocarpa]
Pop_A01G032337	ICU4	AT1G52150	Shoot apical	Shoot apical meristem	10.1093/pcp/pcv078	HD-ZIPIII [Populus tomentosa]
Pop_A01G075836	EMB80	AT1G55350	Shoot apical	Shoot apical meristem	10.1093/pcp/pcv110	calpain-type cysteine protease DEK1 isoform X1 [Populus trichocarpa]
Pop_A04G018431	WAM1	AT1G62360	Shoot apical	Shoot apical meristem	10.1016/s0092-8674(02)00656-6	KNOX/ELK homeobox transcription factor [Populus tomentosa]
Pop_A04G018431	WAM1	AT1G62360	Shoot apical	Shoot apical meristem	10.1093/pcp/pcv078	KNOX/ELK homeobox transcription factor [Populus tomentosa]
Pop_A02G004973	FLO5	AT1G75820	Shoot apical	Shoot apical meristem	10.1093/pcp/pcv078	receptor protein kinase-1 [Populus tomentosa]
Pop_A05G073145	WUS1	AT2G17950	Shoot apical	Shoot apical meristem	10.1101/gad.17258511	WUSa [Populus tomentosa]
Pop_A05G073145	WUS1	AT2G17950	Shoot apical	shoot apical meristem	10.1016/S0070-2153(10)91004-1	WUSa [Populus tomentosa]
Pop_A05G073145	WUS1	AT2G17950	Shoot apical	shoot apical meristem	10.1016/S0092-8674(00)81703-1	WUSa [Populus tomentosa]
Pop_A05G073145	WUS1	AT2G17950	Shoot apical	shoot apical meristem	10.1016/S0092-8674(00)80700-X	WUSa [Populus tomentosa]
Pop_A01G081708	MEE22	AT2G34780	Shoot apical	shoot apical meristem	10.1111/j.1365-313X.2008.03708.x	uncharacterized protein LOC7480412 isoform X1 [Populus trichocarpa]
Pop_A06G062268	BOP2	AT2G41370	Shoot apical	Shoot apical meristem	10.1093/pcp/pcv078	PREDICTED: regulatory protein NPR5 [Populus euphratica]
Pop_A13G031246	ULT1	AT4G28190	Shoot apical	shoot apical meristem	10.1534/genetics.104.028787	protein ULTRAPETALA 1 [Populus trichocarpa]
Pop_A13G031246	ULT1	AT4G28190	Shoot apical	shoot apical meristem	10.1534/genetics.104.028787	protein ULTRAPETALA 1 [Populus trichocarpa]
Pop_A12G007887	STF1	AT5G51820	Shoot apical	Shoot apical meristem	10.1023/B:PLAN.0000019062.80459.80	PREDICTED: phosphoglucomutase, chloroplastic-like [Populus euphratica]
Pop_A11G015715	ETC1	AT1G01380	Leaf	Trichome	10.3390/ijms20205014	PREDICTED: MYB-like transcription factor ETC1 isoform X1 [Populus euphratica]
Pop_A11G015715	ETC1	AT1G01380	Leaf	Trichome	10.1186/1471-2229-8-81	PREDICTED: MYB-like transcription factor ETC1 isoform X1 [Populus euphratica]
Pop_A02G066312	SPL8	AT1G02065	Leaf	Trichome	10.3390/ijms20205014	squamosa promoter-binding-like protein 8 [Populus trichocarpa]
Pop_A04G026376	RGA2	AT1G14920	Leaf	Trichome	10.1104/pp.107.104794	DELLA protein GAI [Populus trichocarpa]
Pop_A04G026376	RGA2	AT1G14920	Leaf	Trichome	10.1111/pbi.13167	DELLA protein GAI [Populus trichocarpa]
Pop_A06G079378	TIFY10A	AT1G19180	Leaf	Trichome	10.1111/pbi.13167	PREDICTED: protein TIFY 10A [Populus euphratica]
Pop_A08G063991	PFT1	AT1G25540	Leaf	Trichome	10.1007/s11103-017-0657-x	hypothetical protein POPTR_008G117700 [Populus trichocarpa]
Pop_A08G063983	TEM1	AT1G25560	Leaf	Trichome	10.1111/pbi.13167	PREDICTED: AP2/ERF and B3 domain-containing transcription repressor TEM1-like [Populus euphratica]
Pop_A01G004107	ZBF1	AT1G32640	Leaf	Trichome	10.3390/ijms20205014	MYC2 [Populus tomentosa]
Pop_A13G054165	SVB	AT1G56580	Leaf	Trichome	10.3390/ijms20205014	uncharacterized protein LOC7478891 [Populus trichocarpa]
Pop_A01G059930	BLT	AT1G64690	Leaf	Trichome	10.3390/ijms20205014	PREDICTED: protein BRANCHLESS TRICHOME [Populus euphratica]
Pop_A01G032189	RGL1	AT1G66350	Leaf	Trichome	10.1104/pp.107.104794	scarecrow-like protein 21 [Populus trichocarpa]
Pop_A08G086509	TPS6	AT1G68020	Leaf	Trichome	10.1104/pp.107.107441	PREDICTED: alpha,alpha-trehalose-phosphate synthase [UDP-forming] 6-like [Populus euphratica]
Pop_A08G064058	---	AT1G68360	Leaf	Trichome	10.1111/pbi.13167	zinc finger protein GIS3 [Populus trichocarpa]
Pop_A03G049231	TEM2	AT1G68840	Leaf	Trichome	10.1111/pbi.13167	B3 domain-containing transcription factor NGA1 [Populus trichocarpa]
Pop_A08G045892	GGT2	AT1G70580	Leaf	Trichome	10.1016/j.plaphy.2017.03.007	alanine aminotransferase family protein [Populus simonii x Populus nigra]
Pop_A04G029182	HDG11	AT1G73360	Leaf	Trichome	10.3390/ijms20205014	PREDICTED: homeobox-leucine zipper protein ROC8-like [Populus euphratica]
Pop_A01G032288	GL2	AT1G79840	Leaf	Trichome	10.1007/s004290050143	PREDICTED: homeobox-leucine zipper protein GLABRA 2 [Populus euphratica]
Pop_A01G032288	GL2	AT1G79840	Leaf	Trichome	10.3390/ijms20205014	PREDICTED: homeobox-leucine zipper protein GLABRA 2 [Populus euphratica]
Pop_A01G032288	GL2	AT1G79840	Leaf	Trichome	10.1002/1526-968X(200010)28:2<68::AID-GENE40>3.0.CO;2-L	PREDICTED: homeobox-leucine zipper protein GLABRA 2 [Populus euphratica]
Pop_A01G032288	GL2	AT1G79840	Leaf	Trichome	10.1111/pbi.13167	PREDICTED: homeobox-leucine zipper protein GLABRA 2 [Populus euphratica]
Pop_A06G061735	RGA1	AT2G01570	Leaf	Trichome	10.1104/pp.107.104794	hypothetical protein POPTR_016G027101 [Populus trichocarpa]
Pop_A06G085725	WRKY44	AT2G37260	Leaf	Trichome	10.1105/tpc.114.129379	WRKY transcription factor 44 [Populus trichocarpa]
Pop_A06G085725	WRKY44	AT2G37260	Leaf	Trichome	10.3390/ijms20205014	WRKY transcription factor 44 [Populus trichocarpa]
Pop_A06G085725	WRKY44	AT2G37260	Leaf	Trichome	10.1105/tpc.001404	WRKY transcription factor 44 [Populus trichocarpa]
Pop_A06G085725	WRKY44	AT2G37260	Leaf	Trichome	10.1111/pbi.13167	WRKY transcription factor 44 [Populus trichocarpa]
Pop_A16G055269	ZFP8	AT2G41940	Leaf	Trichome	10.1111/pbi.13167	zinc finger protein 8 [Populus trichocarpa]
Pop_A04G018345	CPC	AT2G46410	Leaf	Trichome	10.3390/ijms20205014	PREDICTED: MYB-like transcription factor ETC1 [Populus euphratica]
Pop_A04G018345	CPC	AT2G46410	Leaf	Trichome	10.1111/pbi.13167	PREDICTED: MYB-like transcription factor ETC1 [Populus euphratica]
Pop_A08G063680	NOK	AT3G01140	Leaf	Trichome	10.3390/ijms20205014	transcription factor MYB106 [Populus trichocarpa]
Pop_A14G044059	RGL2	AT3G03450	Leaf	Trichome	10.1104/pp.107.104794	DELLA protein RGL2 [Populus trichocarpa]
Pop_A01G029594	MYB5	AT3G13540	Leaf	Trichome	10.3390/ijms20205014	putative R2R3 MYB transcription factor MYB006 [Populus tomentosa]
Pop_A01G029594	MYB5	AT3G13540	Leaf	Trichome	10.1016/0014-5793(95)01461-6	putative R2R3 MYB transcription factor MYB006 [Populus tomentosa]
Pop_A01G015458	TCP4	AT3G15030	Leaf	Trichome	10.1111/tpj.13772	0
Pop_A01G015458	TCP4	AT3G15030	Leaf	Trichome	10.1111/pbi.13167	0
Pop_A09G059605	AT5MAT	AT3G29590	Leaf	Trichome	10.3390/ijms20205014	malonyl-CoA:anthocyanidin 5-O-glucoside-6''-O-malonyltransferase [Populus trichocarpa]
Pop_A05G073152	TT6	AT3G51240	Leaf	Trichome	10.3390/ijms20205014	unknown [Populus trichocarpa]
Pop_A06G089520	---	AT3G53990	Leaf	Trichome	10.1016/j.plaphy.2006.04.004	PREDICTED: universal stress protein A-like protein [Populus euphratica]
Pop_A02G065305	HAT1	AT3G54610	Leaf	Trichome	10.1007/s00425-018-2923-9	PREDICTED: histone acetyltransferase GCN5-like [Populus euphratica]
Pop_A05G073068	AGL16	AT3G57230	Leaf	Trichome	10.1111/j.1365-313X.2000.00891.x	hypothetical protein POPTR_005G150501 [Populus trichocarpa]
Pop_A05G073068	AGL16	AT3G57230	Leaf	trichome	10.1111/j.1365-313X.2000.00891.x	hypothetical protein POPTR_005G150501 [Populus trichocarpa]
Pop_G06G003761	GIS	AT3G58070	Leaf	Trichome	10.1111/pbi.13167	zinc finger protein 8 [Populus trichocarpa]
Pop_A02G012207	ANL2	AT4G00730	Leaf	Trichome	10.3390/ijms20205014	homeobox-leucine zipper protein ANTHOCYANINLESS 2 isoform X1 [Populus trichocarpa]
Pop_A02G005414	TT8	AT4G09820	Leaf	Trichome	10.3390/ijms20205014	basic helix-loop-helix protein A [Populus trichocarpa]
Pop_A01G059975	TT18	AT4G22880	Leaf	Trichome	10.3390/ijms20205014	unknown [Populus trichocarpa]
Pop_A04G070785	UPL3	AT4G38600	Leaf	Trichome	10.1111/tpj.12132	E3 ubiquitin-protein ligase UPL3 isoform X2 [Populus trichocarpa]
Pop_A06G079285	GGT2	AT4G39650	Leaf	Trichome	10.1016/j.plaphy.2017.03.007	hypothetical protein POPTR_006G149200, partial [Populus trichocarpa]
Pop_A06G053661	GIS2	AT5G06650	Leaf	Trichome	10.1111/pbi.13167	hypothetical protein POPTR_006G194700 [Populus trichocarpa]
Pop_A17G008618	TT19	AT5G17220	Leaf	Trichome	10.3390/ijms20205014	glutathione S-transferase F8 [Populus yatungensis]
Pop_A12G067090	URM23	AT5G24520	Leaf	Trichome	10.1105/tpc.114.129379	protein TRANSPARENT TESTA GLABRA 1 [Populus trichocarpa]
Pop_A12G067090	URM23	AT5G24520	Leaf	Trichome	10.3390/ijms20205014	protein TRANSPARENT TESTA GLABRA 1 [Populus trichocarpa]
Pop_A12G067090	URM23	AT5G24520	Leaf	Trichome	10.1111/pbi.13167	protein TRANSPARENT TESTA GLABRA 1 [Populus trichocarpa]
Pop_A02G065245	DMR6	AT5G24530	Leaf	Trichome	10.3390/ijms20205014	PREDICTED: 2'-deoxymugineic-acid 2'-dioxygenase-like [Populus euphratica]
Pop_A01G003801	MYB23	AT5G40330	Leaf	Trichome	10.1271/bbb.110811	transcription factor MYB114 [Populus trichocarpa]
Pop_A01G003801	MYB23	AT5G40330	Leaf	Trichome	10.3390/ijms20205014	transcription factor MYB114 [Populus trichocarpa]
Pop_A01G003801	MYB23	AT5G40330	Leaf	Trichome	10.1271/bbb.110811	transcription factor MYB114 [Populus trichocarpa]
Pop_A01G059685	MYC6.2	AT5G41315	Leaf	Trichome	10.1105/tpc.114.129379	transcription factor GLABRA 3 [Populus trichocarpa]
Pop_A01G059685	MYC6.2	AT5G41315	Leaf	Trichome	10.1111/tpj.12132	transcription factor GLABRA 3 [Populus trichocarpa]
Pop_A01G059685	MYC6.2	AT5G41315	Leaf	Trichome	10.1016/j.bbrc.2017.02.074	transcription factor GLABRA 3 [Populus trichocarpa]
Pop_A01G059685	MYC6.2	AT5G41315	Leaf	Trichome	10.1111/pbi.13167	transcription factor GLABRA 3 [Populus trichocarpa]
Pop_A02G005055	TT3	AT5G42800	Leaf	Trichome	10.3390/ijms20205014	dihydroflavonol reductase [Populus tremuloides]
Pop_A06G061654	MYB82	AT5G52600	Leaf	Trichome	10.1093/jxb/eru179	transcription factor WER [Populus trichocarpa]
Pop_A02G012351	TRY	AT5G53200	Leaf	Trichome	10.1186/1471-2229-11-130	hypothetical protein POPTR_002G168900 [Populus trichocarpa]
Pop_A02G012351	TRY	AT5G53200	Leaf	Trichome	10.1186/1471-2229-11-130	hypothetical protein POPTR_002G168900 [Populus trichocarpa]
Pop_A02G012351	TRY	AT5G53200	Leaf	Trichome	10.1111/pbi.13167	hypothetical protein POPTR_002G168900 [Populus trichocarpa]
Pop_A06G064897	YRE	AT5G57800	Leaf	Trichome	10.1046/j.1365-313X.2003.01854.x	protein ECERIFERUM 3 isoform X1 [Populus trichocarpa]
Pop_A06G064897	YRE	AT5G57800	Leaf	Trichome	10.1046/j.1365-313X.2003.01854.x	protein ECERIFERUM 3 isoform X1 [Populus trichocarpa]
Pop_A05G073613	GCN5	AT5G64840	Leaf	Trichome	10.1007/s00425-018-2923-9	PREDICTED: ABC transporter F family member 5-like [Populus euphratica]
Pop_A02G065679	ATAF1	AT1G01720	Leaf	Vasculature	10.1093/plcell/koaa060	NAC domain-containing protein 2 [Populus trichocarpa]
Pop_A01G056950	SR45a	AT1G07350	Leaf	Vasculature	10.1093/plcell/koaa060	serine/arginine-rich splicing factor SR45a isoform X3 [Populus trichocarpa]
Pop_A01G057025	---	AT1G07400	Leaf	Vasculature	10.1093/plcell/koaa060	PREDICTED: 17.3 kDa class I heat shock protein-like [Populus euphratica]
Pop_A01G074942	---	AT1G07750	Leaf	Vasculature	10.1093/plcell/koaa060	glutelin type-A 3 [Populus trichocarpa]
Pop_A09G083601	MEE6	AT1G07890	Leaf	Vasculature	10.1093/plcell/koaa060	PREDICTED: L-ascorbate peroxidase, cytosolic [Populus euphratica]
Pop_A05G072099	ESL1	AT1G08920	Leaf	Vasculature	10.1093/plcell/koaa060	sugar transporter ERD6-like 3 isoform X1 [Populus trichocarpa]
Pop_A05G016943	SRC2	AT1G09070	Leaf	Vasculature	10.1093/plcell/koaa060	PREDICTED: uncharacterized protein LOC105134212 [Populus euphratica]
Pop_A05G016891	ACLA-3	AT1G09430	Leaf	Vasculature	10.1093/plcell/koaa060	ATP-citrate synthase alpha chain protein 2 [Populus trichocarpa]
Pop_A09G015376	RLK7	AT1G09970	Leaf	Vasculature	10.1093/plcell/koaa060	receptor-like protein kinase HAIKU2 [Populus trichocarpa]
Pop_A01G010319	WLIM1	AT1G10200	Leaf	Vasculature	10.1093/plcell/koaa060	LIM domain protein GLIM1b [Populus tremula x Populus alba]
Pop_A10G047716	GSTU17	AT1G10370	Leaf	Vasculature	10.1093/plcell/koaa060	glutathione S-transferase [Populus alba x Populus glandulosa]
Pop_A04G018286	PMEPCRA	AT1G11580	Leaf	Vasculature	10.1093/plcell/koaa060	PREDICTED: pectinesterase [Populus euphratica]
Pop_A01G059693	UGE1	AT1G12780	Leaf	Vasculature	10.1093/plcell/koaa060	hypothetical protein POPTR_001G102700 [Populus trichocarpa]
Pop_A17G020581	---	AT1G14340	Leaf	Vasculature	10.1093/plcell/koaa060	binding partner of ACD11 1 [Populus trichocarpa]
Pop_A01G004511	---	AT1G15400	Leaf	Vasculature	10.1093/plcell/koaa060	uncharacterized protein At1g15400 [Populus trichocarpa]
Pop_A06G061731	---	AT1G15740	Leaf	Vasculature	10.1093/plcell/koaa060	leucine-rich repeat family protein [Populus tomentosa]
Pop_A08G006831	SOT17	AT1G18590	Leaf	Vasculature	10.1093/plcell/koaa060	hypothetical protein POPTR_008G018500, partial [Populus trichocarpa]
Pop_A12G019368	PSP	AT1G18640	Leaf	Vasculature	10.1093/plcell/koaa060	phosphoserine phosphatase, chloroplastic [Populus trichocarpa]
Pop_A06G079378	TIFY10A	AT1G19180	Leaf	Vasculature	10.1093/plcell/koaa060	PREDICTED: protein TIFY 10A [Populus euphratica]
Pop_A05G002097	OPCL1	AT1G20510	Leaf	Vasculature	10.1093/plcell/koaa060	PREDICTED: 4-coumarate--CoA ligase-like 5 [Populus euphratica]
Pop_A05G057049	---	AT1G21000	Leaf	Vasculature	10.1093/plcell/koaa060	unknown [Populus trichocarpa x Populus deltoides]
Pop_A02G005480	---	AT1G22790	Leaf	Vasculature	10.1093/plcell/koaa060	uncharacterized protein LOC7468764 [Populus trichocarpa]
Pop_A10G001686	SULTR3;3	AT1G23090	Leaf	Vasculature	10.1093/plcell/koaa060	hypothetical protein POPTR_010G111700 [Populus trichocarpa]
Pop_A15G017122	UGT74B1	AT1G24100	Leaf	Vasculature	10.1093/plcell/koaa060	UDP-glucoronosyl/UDP-glucosyl transferase family protein [Populus tomentosa]
Pop_A04G010943	---	AT1G26800	Leaf	Vasculature	10.1093/plcell/koaa060	PREDICTED: E3 ubiquitin-protein ligase RING1-like [Populus euphratica]
Pop_A01G074989	---	AT1G28280	Leaf	Vasculature	10.1093/plcell/koaa060	PREDICTED: uncharacterized protein LOC105139156 [Populus euphratica]
Pop_A04G019565	DYL1	AT1G28330	Leaf	Vasculature	10.1093/plcell/koaa060	auxin-repressed 12.5 kDa protein isoform X1 [Populus trichocarpa];auxin-repressed 12.5 kDa protein isoform X2 [Populus trichocarpa]
Pop_A11G056650	---	AT1G28580	Leaf	Vasculature	10.1093/plcell/koaa060	PREDICTED: GDSL esterase/lipase At1g28580-like [Populus euphratica]
Pop_A01G004197	---	AT1G32050	Leaf	Vasculature	10.1093/plcell/koaa060	PREDICTED: secretory carrier-associated membrane protein 4-like [Populus euphratica]
Pop_A01G004107	ZBF1	AT1G32640	Leaf	Vasculature	10.1093/plcell/koaa060	MYC2 [Populus tomentosa]
Pop_A05G073003	---	AT1G32700	Leaf	Vasculature	10.1093/plcell/koaa060	hypothetical protein POPTR_005G130300 [Populus trichocarpa]
Pop_A18G018881	---	AT1G35190	Leaf	Vasculature	10.1093/plcell/koaa060	PREDICTED: probable iron/ascorbate oxidoreductase DDB_G0283291 isoform X1 [Populus euphratica];PREDICTED: probable iron/ascorbate oxidoreductase DDB_G0283291 isoform X2 [Populus euphratica]
Pop_A02G088571	---	AT1G35780	Leaf	Vasculature	10.1093/plcell/koaa060	PREDICTED: uncharacterized protein LOC105119856 [Populus euphratica]
Pop_A02G088752	SHM7	AT1G36370	Leaf	Vasculature	10.1093/plcell/koaa060	serine hydroxymethyltransferase 7 [Populus trichocarpa]
Pop_A09G015390	C/VIF1	AT1G47960	Leaf	Vasculature	10.1093/plcell/koaa060	basic form of pathogenesis-related protein 1 [Populus trichocarpa]
Pop_A01G058862	SCL5	AT1G50600	Leaf	Vasculature	10.1093/plcell/koaa060	phytochrome A signal transduction 1 [Populus deltoides x Populus x canadensis]
Pop_A01G058805	ERF3	AT1G50640	Leaf	Vasculature	10.1093/plcell/koaa060	PREDICTED: ethylene-responsive transcription factor 3 [Populus euphratica]
Pop_A03G049666	JR3	AT1G51760	Leaf	Vasculature	10.1093/plcell/koaa060	IAA-amino acid hydrolase [Populus tomentosa]
Pop_A01G056846	---	AT1G53540	Leaf	Vasculature	10.1093/plcell/koaa060	16.9 kDa class I heat shock protein 2 [Populus trichocarpa]
Pop_A01G003851	---	AT1G54050	Leaf	Vasculature	10.1093/plcell/koaa060	hypothetical protein POPTR_001G164200 [Populus trichocarpa]
Pop_A01G029539	---	AT1G55210	Leaf	Vasculature	10.1093/plcell/koaa060	PREDICTED: dirigent protein 19-like [Populus euphratica]
Pop_A01G075837	---	AT1G55360	Leaf	Vasculature	10.1093/plcell/koaa060	uncharacterized protein LOC7483235 [Populus trichocarpa]
Pop_A01G074892	---	AT1G55530	Leaf	Vasculature	10.1093/plcell/koaa060	hypothetical protein POPTR_T133600 [Populus trichocarpa]
Pop_A01G015527	---	AT1G55840	Leaf	Vasculature	10.1093/plcell/koaa060	DNA-directed RNA polymerases I and III subunit RPAC1 [Populus trichocarpa]
Pop_A05G073385	NF-YC2	AT1G56170	Leaf	Vasculature	10.1093/plcell/koaa060	nuclear transcription factor Y subunit C-2 [Populus trichocarpa]
Pop_A02G023800	ATB2	AT1G60710	Leaf	Vasculature	10.1093/plcell/koaa060	probable aldo-keto reductase 2 [Populus trichocarpa]
Pop_A06G062296	MEE9	AT1G60870	Leaf	Vasculature	10.1093/plcell/koaa060	uncharacterized protein LOC7458467 [Populus trichocarpa]
Pop_A04G018198	---	AT1G61660	Leaf	Vasculature	10.1093/plcell/koaa060	PREDICTED: transcription factor bHLH112 isoform X1 [Populus euphratica]
Pop_A08G086529	ZFP4	AT1G66140	Leaf	Vasculature	10.1093/plcell/koaa060	zinc finger protein 4 [Populus trichocarpa]
Pop_A17G075197	---	AT1G66480	Leaf	Vasculature	10.1093/plcell/koaa060	uncharacterized protein At1g66480 isoform X1 [Populus trichocarpa]
Pop_A08G045911	---	AT1G67850	Leaf	Vasculature	10.1093/plcell/koaa060	uncharacterized protein LOC7473208 [Populus trichocarpa]
Pop_A06G079438	---	AT1G67910	Leaf	Vasculature	10.1093/plcell/koaa060	hypothetical protein POPTR_006G159300 [Populus trichocarpa]
Pop_A06G061980	---	AT1G68570	Leaf	Vasculature	10.1093/plcell/koaa060	hypothetical protein POPTR_006G034000 [Populus trichocarpa]
Pop_A04G019636	TCP15	AT1G69690	Leaf	Vasculature	10.1093/plcell/koaa060	PREDICTED: transcription factor TCP14-like [Populus euphratica]
Pop_A05G073035	HVA22C	AT1G69700	Leaf	Vasculature	10.1093/plcell/koaa060	uncharacterized protein LOC7460199 isoform X1 [Populus trichocarpa]
Pop_A10G047729	NTL1	AT1G69850	Leaf	Vasculature	10.1093/plcell/koaa060	protein NRT1/ PTR FAMILY 4.6 isoform X1 [Populus trichocarpa]
Pop_A08G086474	CLO4	AT1G70670	Leaf	Vasculature	10.1093/plcell/koaa060	probable peroxygenase 4 [Populus trichocarpa]
Pop_A01G054837	---	AT1G72810	Leaf	Vasculature	10.1093/plcell/koaa060	hypothetical protein [Populus tomentosa]
Pop_A12G073762	MKK9	AT1G73500	Leaf	Vasculature	10.1093/plcell/koaa060	mitogen-activated protein kinase kinase 9 [Populus trichocarpa]
Pop_A12G074010	SOT16	AT1G74100	Leaf	Vasculature	10.1093/plcell/koaa060	flavonol sulfotransferase-like [Populus trichocarpa]
Pop_A15G017228	HSP101	AT1G74310	Leaf	Vasculature	10.1093/plcell/koaa060	chaperone protein ClpB1 [Populus trichocarpa]
Pop_A12G019236	ALDH10A8	AT1G74920	Leaf	Vasculature	10.1093/plcell/koaa060	betaine aldehyde dehydrogenase 1, chloroplastic-like [Populus euphratica]
Pop_A02G026902	ATL8	AT1G76410	Leaf	Vasculature	10.1093/plcell/koaa060	RING-H2 finger protein ATL8 [Populus trichocarpa]
Pop_A01G054539	NAC032	AT1G77450	Leaf	Vasculature	10.1093/plcell/koaa060	NAC domain-containing protein 83 [Populus trichocarpa]
Pop_A02G088539	SULTR2;2	AT1G77990	Leaf	Vasculature	10.1093/plcell/koaa060	low affinity sulfate transporter 3 [Populus trichocarpa]
Pop_A02G088565	---	AT1G78110	Leaf	Vasculature	10.1093/plcell/koaa060	uncharacterized protein LOC18096230 [Populus trichocarpa]
Pop_A02G088604	TSD2	AT1G78240	Leaf	Vasculature	10.1093/plcell/koaa060	probable pectin methyltransferase QUA2 [Populus trichocarpa]
Pop_A08G012032	Kin2	AT2G02800	Leaf	Vasculature	10.1093/plcell/koaa060	PREDICTED: protein kinase 2B, chloroplastic-like isoform X1 [Populus euphratica];PREDICTED: protein kinase 2B, chloroplastic-like isoform X2 [Populus euphratica]
Pop_A06G079360	---	AT2G05920	Leaf	Vasculature	10.1093/plcell/koaa060	LOW QUALITY PROTEIN: subtilisin-like protease SBT1.8 [Populus trichocarpa]
Pop_A01G010311	ATAKN1	AT2G14750	Leaf	Vasculature	10.1093/plcell/koaa060	adenylyl-sulfate kinase 3 [Populus trichocarpa]
Pop_A01G024858	NTRA	AT2G17420	Leaf	Vasculature	10.1093/plcell/koaa060	hypothetical protein POPTR_001G456900 [Populus trichocarpa]
Pop_A05G073078	TLP2	AT2G18280	Leaf	Vasculature	10.1093/plcell/koaa060	PREDICTED: tubby-like F-box protein 2 [Populus euphratica]
Pop_A18G018840	PMA	AT2G18960	Leaf	Vasculature	10.1093/plcell/koaa060	hypothetical protein CDL15_Pgr016028 [Punica granatum]
Pop_A07G085238	---	AT2G20560	Leaf	Vasculature	10.1093/plcell/koaa060	dnaJ homolog subfamily B member 4 isoform X1 [Populus trichocarpa]
Pop_A04G018075	---	AT2G20760	Leaf	Vasculature	10.1093/plcell/koaa060	PREDICTED: clathrin light chain 2-like [Populus euphratica]
Pop_A07G022749	bZIP6	AT2G22850	Leaf	Vasculature	10.1093/plcell/koaa060	basic leucine zipper 43 [Populus trichocarpa]
Pop_A01G080007	ASG1	AT2G24100	Leaf	Vasculature	10.1093/plcell/koaa060	uncharacterized protein LOC7476451 isoform X1 [Populus trichocarpa]
Pop_A06G064898	LRL1	AT2G24260	Leaf	Vasculature	10.1093/plcell/koaa060	transcription factor bHLH66 [Populus trichocarpa]
Pop_A06G053746	---	AT2G25910	Leaf	Vasculature	10.1093/plcell/koaa060	uncharacterized protein LOC7462279 [Populus trichocarpa]
Pop_A06G053309	HSFA2	AT2G26150	Leaf	Vasculature	10.1093/plcell/koaa060	heat shock transcription factor A2 [Populus simonii]
Pop_A06G053310	MAX1	AT2G26170	Leaf	Vasculature	10.1093/plcell/koaa060	PREDICTED: cytochrome P450 711A1 [Populus euphratica]
Pop_A10G046555	---	AT2G26230	Leaf	Vasculature	10.1093/plcell/koaa060	uricase-2 isozyme 1 [Populus trichocarpa]
Pop_A04G059321	FD3	AT2G27510	Leaf	Vasculature	10.1093/plcell/koaa060	ferredoxin [Populus tomentosa]
Pop_A04G059328	---	AT2G27730	Leaf	Vasculature	10.1093/plcell/koaa060	PREDICTED: uncharacterized protein At2g27730, mitochondrial-like isoform X1 [Populus euphratica]
Pop_A01G056993	CYP5	AT2G29960	Leaf	Vasculature	10.1093/plcell/koaa060	peptidyl-prolyl cis-trans isomerase CYP20-1 [Populus trichocarpa]
Pop_A01G005875	ZIP6	AT2G30080	Leaf	Vasculature	10.1093/plcell/koaa060	zinc transporter 6, chloroplastic [Populus trichocarpa]
Pop_A06G089344	ASP1	AT2G30970	Leaf	Vasculature	10.1093/plcell/koaa060	aspartate aminotransferase, mitochondrial isoform X6 [Populus trichocarpa]
Pop_A02G065237	ATADF6	AT2G31200	Leaf	Vasculature	10.1093/plcell/koaa060	actin-depolymerizing factor [Populus trichocarpa]
Pop_A06G062115	---	AT2G32240	Leaf	Vasculature	10.1093/plcell/koaa060	PREDICTED: LOW QUALITY PROTEIN: centromere-associated protein E-like [Populus euphratica]
Pop_A01G010394	CB5-B	AT2G32720	Leaf	Vasculature	10.1093/plcell/koaa060	cytochrome b5 [Populus trichocarpa]
Pop_A12G027583	---	AT2G35120	Leaf	Vasculature	10.1093/plcell/koaa060	glycine cleavage system H protein 2, mitochondrial [Populus trichocarpa]
Pop_A01G054581	EDA29	AT2G35940	Leaf	Vasculature	10.1093/plcell/koaa060	BEL1-like homeodomain protein 1 [Populus trichocarpa]
Pop_A06G085684	---	AT2G37120	Leaf	Vasculature	10.1093/plcell/koaa060	DNA-binding protein S1FA [Populus trichocarpa]
Pop_A06G085822	PIP2B	AT2G37170	Leaf	Vasculature	10.1093/plcell/koaa060	putative plasma membrane intrinsic protein [Populus tremula x Populus tremuloides]
Pop_A06G053428	ALS3	AT2G37330	Leaf	Vasculature	10.1093/plcell/koaa060	protein ALUMINUM SENSITIVE 3 [Populus trichocarpa]
Pop_A01G079815	---	AT2G38800	Leaf	Vasculature	10.1093/plcell/koaa060	PREDICTED: uncharacterized protein LOC105107380 [Populus euphratica]
Pop_A08G063466	ZFAR1	AT2G40140	Leaf	Vasculature	10.1093/plcell/koaa060	PREDICTED: zinc finger CCCH domain-containing protein 29-like [Populus euphratica]
Pop_A10G047615	---	AT2G42490	Leaf	Vasculature	10.1093/plcell/koaa060	PREDICTED: copper amine oxidase 1-like isoform X1 [Populus euphratica]
Pop_A03G014591	---	AT2G44130	Leaf	Vasculature	10.1093/plcell/koaa060	PREDICTED: F-box/kelch-repeat protein At2g44130-like [Populus euphratica]
Pop_A07G085303	MTHFR2	AT2G44160	Leaf	Vasculature	10.1093/plcell/koaa060	PREDICTED: methylenetetrahydrofolate reductase 2 isoform X1 [Theobroma cacao]
Pop_A01G004043	RAB6A	AT2G44610	Leaf	Vasculature	10.1093/plcell/koaa060	PREDICTED: ras-related protein RABH1b-like isoform X1 [Populus euphratica]
Pop_A02G012182	---	AT2G45680	Leaf	Vasculature	10.1093/plcell/koaa060	transcription factor TCP9 [Populus trichocarpa]
Pop_A02G012320	ABIL1	AT2G46225	Leaf	Vasculature	10.1093/plcell/koaa060	PREDICTED: protein ABIL1-like isoform X1 [Populus euphratica]
Pop_A02G012323	BAG6	AT2G46240	Leaf	Vasculature	10.1093/plcell/koaa060	PREDICTED: BAG family molecular chaperone regulator 6 [Populus euphratica]
Pop_A02G012426	---	AT2G46690	Leaf	Vasculature	10.1093/plcell/koaa060	auxin-responsive protein SAUR32 [Populus trichocarpa]
Pop_A02G012574	GolS1	AT2G47180	Leaf	Vasculature	10.1093/plcell/koaa060	PREDICTED: galactinol synthase 1 [Populus euphratica]
Pop_A17G020628	MTO1	AT3G01120	Leaf	Vasculature	10.1093/plcell/koaa060	cystathionine gamma-synthase 1, chloroplastic [Populus trichocarpa]
Pop_A01G032123	---	AT3G01820	Leaf	Vasculature	10.1093/plcell/koaa060	probable adenylate kinase 7, mitochondrial [Populus trichocarpa]
Pop_A12G067985	RGP1	AT3G02230	Leaf	Vasculature	10.1093/plcell/koaa060	UDP-arabinopyranose mutase 1 isoform X2 [Populus trichocarpa]
Pop_A04G026375	---	AT3G02360	Leaf	Vasculature	10.1093/plcell/koaa060	hypothetical protein POPTR_T017600 [Populus trichocarpa]
Pop_A05G071813	---	AT3G04830	Leaf	Vasculature	10.1093/plcell/koaa060	ER membrane protein complex subunit 2 [Populus trichocarpa]
Pop_A13G054259	ACP1	AT3G05020	Leaf	Vasculature	10.1093/plcell/koaa060	PREDICTED: acyl carrier protein 1, chloroplastic-like isoform X2 [Populus euphratica]
Pop_A02G023797	SCN1	AT3G07880	Leaf	Vasculature	10.1093/plcell/koaa060	rho GDP-dissociation inhibitor 1 [Populus trichocarpa]
Pop_A08G086486	UBC11	AT3G08690	Leaf	Vasculature	10.1093/plcell/koaa060	ubiquitin-conjugating enzyme E2 11 [Populus trichocarpa]
Pop_A08G058017	WI12	AT3G10985	Leaf	Vasculature	10.1093/plcell/koaa060	uncharacterized protein LOC112328974 [Populus trichocarpa]
Pop_A08G057977	LBD21	AT3G11090	Leaf	Vasculature	10.1093/plcell/koaa060	PREDICTED: LOB domain-containing protein 21-like [Populus euphratica]
Pop_A06G053626	---	AT3G11930	Leaf	Vasculature	10.1093/plcell/koaa060	PREDICTED: universal stress protein A-like protein isoform X1 [Populus euphratica]
Pop_A06G053666	---	AT3G12050	Leaf	Vasculature	10.1093/plcell/koaa060	activator of 90 kDa heat shock protein ATPase homolog [Populus trichocarpa]
Pop_A01G080018	HSP70	AT3G12580	Leaf	Vasculature	10.1093/plcell/koaa060	heat shock 70 kDa protein [Populus trichocarpa]
Pop_A05G071710	---	AT3G13275	Leaf	Vasculature	10.1093/plcell/koaa060	hypothetical protein POPTR_005G061200 [Populus trichocarpa]
Pop_A01G054765	---	AT3G13510	Leaf	Vasculature	10.1093/plcell/koaa060	PREDICTED: uncharacterized protein LOC105111378 [Populus euphratica]
Pop_A01G054829	---	AT3G13930	Leaf	Vasculature	10.1093/plcell/koaa060	dihydrolipoyllysine-residue acetyltransferase component 2 of pyruvate dehydrogenase complex, mitochondrial [Populus trichocarpa]
Pop_A01G003847	---	AT3G14200	Leaf	Vasculature	10.1093/plcell/koaa060	chaperone protein DnaJ isoform X1 [Populus trichocarpa]
Pop_A01G032265	PDX1.2	AT3G16050	Leaf	Vasculature	10.1093/plcell/koaa060	pyridoxal 5'-phosphate synthase-like subunit PDX1.2 [Populus trichocarpa]
Pop_A01G011820	PAP1	AT3G16500	Leaf	Vasculature	10.1093/plcell/koaa060	auxin-responsive protein IAA26 isoform X1 [Populus trichocarpa]
Pop_A04G019575	---	AT3G17950	Leaf	Vasculature	10.1093/plcell/koaa060	uncharacterized protein LOC18109819 [Populus trichocarpa]
Pop_A17G075198	---	AT3G18560	Leaf	Vasculature	10.1093/plcell/koaa060	PREDICTED: uncharacterized protein LOC105113593 [Populus euphratica]
Pop_A04G030611	---	AT3G19240	Leaf	Vasculature	10.1093/plcell/koaa060	protein CYPRO4 [Populus trichocarpa]
Pop_A04G059362	EIN3	AT3G20770	Leaf	Vasculature	10.1093/plcell/koaa060	protein ETHYLENE INSENSITIVE 3 [Populus trichocarpa]
Pop_A06G062078	---	AT3G22290	Leaf	Vasculature	10.1093/plcell/koaa060	PREDICTED: endoplasmic reticulum-Golgi intermediate compartment protein 3-like [Populus euphratica]
Pop_A08G046246	---	AT3G22440	Leaf	Vasculature	10.1093/plcell/koaa060	FRIGIDA-like protein 4a [Populus trichocarpa]
Pop_A01G079898	GR1	AT3G24170	Leaf	Vasculature	10.1093/plcell/koaa060	PREDICTED: glutathione reductase, chloroplastic [Populus euphratica]
Pop_A02G023792	QUA1	AT3G25140	Leaf	Vasculature	10.1093/plcell/koaa060	galacturonosyltransferase 8 [Populus trichocarpa]
Pop_A02G033001	ROF1	AT3G25230	Leaf	Vasculature	10.1093/plcell/koaa060	peptidyl-prolyl cis-trans isomerase FKBP62 isoform X1 [Populus trichocarpa]
Pop_A03G049894	---	AT3G25910	Leaf	Vasculature	10.1093/plcell/koaa060	hypothetical protein POPTR_003G060800 [Populus trichocarpa]
Pop_A04G002682	scpl48	AT3G45010	Leaf	Vasculature	10.1093/plcell/koaa060	serine carboxypeptidase-like [Populus trichocarpa]
Pop_A08G063729	RABE1c	AT3G46060	Leaf	Vasculature	10.1093/plcell/koaa060	ras-related protein RABE1c [Populus trichocarpa]
Pop_A09G026661	KING1	AT3G48530	Leaf	Vasculature	10.1093/plcell/koaa060	SNF1-related protein kinase regulatory subunit gamma-1 isoform X1 [Populus trichocarpa]
Pop_A04G002615	CEN2	AT3G50360	Leaf	Vasculature	10.1093/plcell/koaa060	PREDICTED: sorcin-like isoform X2 [Populus euphratica]
Pop_A02G065456	SULTR3;1	AT3G51895	Leaf	Vasculature	10.1093/plcell/koaa060	sulfate transporter 3.1 isoform X1 [Populus trichocarpa]
Pop_A01G057034	---	AT3G51950	Leaf	Vasculature	10.1093/plcell/koaa060	zinc finger CCCH domain-containing protein 53 isoform X1 [Populus trichocarpa]
Pop_A06G053459	CAH1	AT3G52720	Leaf	Vasculature	10.1093/plcell/koaa060	alpha carbonic anhydrase 1, chloroplastic [Populus trichocarpa]
Pop_A08G063383	---	AT3G53960	Leaf	Vasculature	10.1093/plcell/koaa060	PREDICTED: protein NRT1/ PTR FAMILY 5.6-like [Populus euphratica]
Pop_A06G089483	UCP1	AT3G54110	Leaf	Vasculature	10.1093/plcell/koaa060	mitochondrial uncoupling protein 1 isoform X1 [Populus trichocarpa]
Pop_A08G064187	---	AT3G55430	Leaf	Vasculature	10.1093/plcell/koaa060	hypothetical protein [Populus tomentosa]
Pop_A08G063410	WLIM2b	AT3G55770	Leaf	Vasculature	10.1093/plcell/koaa060	LIM domain protein WLIM2a [Populus tremula x Populus alba]
Pop_A06G061892	CBL	AT3G57050	Leaf	Vasculature	10.1093/plcell/koaa060	cystathionine beta-lyase, chloroplastic [Populus trichocarpa]
Pop_A02G012113	---	AT3G60690	Leaf	Vasculature	10.1093/plcell/koaa060	auxin-responsive protein SAUR36 [Populus trichocarpa]
Pop_A01G059790	AtAGP20	AT3G61640	Leaf	Vasculature	10.1093/plcell/koaa060	arabinogalactan peptide 20 [Populus trichocarpa]
Pop_A02G012623	---	AT3G62550	Leaf	Vasculature	10.1093/plcell/koaa060	PREDICTED: universal stress protein A-like protein [Populus euphratica]
Pop_A02G012634	---	AT3G62580	Leaf	Vasculature	10.1093/plcell/koaa060	transmembrane protein 205 [Populus trichocarpa]
Pop_A01G079738	CKX6	AT3G63440	Leaf	Vasculature	10.1093/plcell/koaa060	PREDICTED: cytokinin dehydrogenase 6-like [Populus euphratica]
Pop_A01G059794	ADNT1	AT4G01100	Leaf	Vasculature	10.1093/plcell/koaa060	PREDICTED: mitochondrial adenine nucleotide transporter ADNT1 [Populus euphratica];unknown [Populus trichocarpa x Populus deltoides]
Pop_A02G065301	UNE12	AT4G02590	Leaf	Vasculature	10.1093/plcell/koaa060	PREDICTED: transcription factor UNE12-like [Populus euphratica]
Pop_A04G018353	---	AT4G04630	Leaf	Vasculature	10.1093/plcell/koaa060	uncharacterized protein LOC7479049 [Populus trichocarpa]
Pop_A08G046489	MSRB5	AT4G04830	Leaf	Vasculature	10.1093/plcell/koaa060	peptide methionine sulfoxide reductase B5 [Populus trichocarpa]
Pop_A11G091307	SDRA	AT4G05530	Leaf	Vasculature	10.1093/plcell/koaa060	tropinone reductase-like 3 [Populus trichocarpa]
Pop_A13G082768	---	AT4G09150	Leaf	Vasculature	10.1093/plcell/koaa060	uncharacterized protein LOC18104388 [Populus trichocarpa]
Pop_A02G005477	---	AT4G09890	Leaf	Vasculature	10.1093/plcell/koaa060	unknown [Populus trichocarpa]
Pop_A07G006589	CYTC-2	AT4G10040	Leaf	Vasculature	10.1093/plcell/koaa060	PREDICTED: cytochrome c-like [Populus euphratica]
Pop_A01G059633	HSFB2B	AT4G11660	Leaf	Vasculature	10.1093/plcell/koaa060	heat stress transcription factor B-2b [Populus trichocarpa]
Pop_A01G004582	Hop3	AT4G12400	Leaf	Vasculature	10.1093/plcell/koaa060	hsp70-Hsp90 organizing protein 3 [Populus trichocarpa]
Pop_A01G010183	SHM4	AT4G13930	Leaf	Vasculature	10.1093/plcell/koaa060	serine hydroxymethyltransferase [Populus tremuloides]
Pop_A01G010367	RALFL32	AT4G14010	Leaf	Vasculature	10.1093/plcell/koaa060	hypothetical protein POPTR_001G321500 [Populus trichocarpa]
Pop_A10G047231	APS3	AT4G14680	Leaf	Vasculature	10.1093/plcell/koaa060	ATP sulfurylase 1, chloroplastic [Populus trichocarpa]
Pop_A02G023896	---	AT4G15420	Leaf	Vasculature	10.1093/plcell/koaa060	uncharacterized protein LOC7468516 [Populus trichocarpa]
Pop_A01G074733	---	AT4G20300	Leaf	Vasculature	10.1093/plcell/koaa060	serine/arginine repetitive matrix protein 1 isoform X3 [Populus trichocarpa];hypothetical protein POPTR_001G073400 [Populus trichocarpa]
Pop_A04G018342	PRXR1	AT4G21960	Leaf	Vasculature	10.1093/plcell/koaa060	Peroxidase [Populus tomentosa]
Pop_A02G023888	PRH26	AT4G21990	Leaf	Vasculature	10.1093/plcell/koaa060	5'-adenylylsulfate reductase 3, chloroplastic isoform X1 [Populus trichocarpa]
Pop_A01G029669	---	AT4G22160	Leaf	Vasculature	10.1093/plcell/koaa060	uncharacterized protein LOC110646200 isoform X1 [Hevea brasiliensis]
Pop_A01G059879	---	AT4G24060	Leaf	Vasculature	10.1093/plcell/koaa060	dof zinc finger protein DOF4.6 [Populus trichocarpa]
Pop_A02G005555	SnRK3.13	AT4G24400	Leaf	Vasculature	10.1093/plcell/koaa060	CBL-interacting serine/threonine-protein kinase 8 isoform X1 [Populus trichocarpa]
Pop_A01G069906	TSB2	AT4G27070	Leaf	Vasculature	10.1093/plcell/koaa060	tryptophan synthase beta chain 1 [Populus trichocarpa]
Pop_A13G032448	---	AT4G28290	Leaf	Vasculature	10.1093/plcell/koaa060	hypothetical protein POPTR_013G131900 [Populus trichocarpa]
Pop_A01G032301	---	AT4G29100	Leaf	Vasculature	10.1093/plcell/koaa060	transcription factor bHLH68 isoform X4 [Populus trichocarpa];transcription factor bHLH68 isoform X3 [Populus trichocarpa]
Pop_A08G006995	---	AT4G29905	Leaf	Vasculature	10.1093/plcell/koaa060	hypothetical protein POPTR_T176700 [Populus trichocarpa]
Pop_A06G064789	PMA2	AT4G30190	Leaf	Vasculature	10.1093/plcell/koaa060	plasma membrane ATPase 4 isoform X2 [Populus trichocarpa]
Pop_A06G064778	ATR2	AT4G30210	Leaf	Vasculature	10.1093/plcell/koaa060	NADPH--cytochrome P450 reductase 2 [Populus trichocarpa]
Pop_A06G063025	---	AT4G31420	Leaf	Vasculature	10.1093/plcell/koaa060	cytoplasmic 60S subunit biogenesis factor REI1 homolog 1 [Populus trichocarpa]
Pop_A02G004901	SUR2	AT4G31500	Leaf	Vasculature	10.1093/plcell/koaa060	hypothetical protein POPTR_002G025500 [Populus trichocarpa]
Pop_A06G062915	WRKY18	AT4G31800	Leaf	Vasculature	10.1093/plcell/koaa060	WRKY transcription factor 9 [(Populus tomentosa x Populus bolleana) x Populus tomentosa]
Pop_A01G004113	EDA9	AT4G34200	Leaf	Vasculature	10.1093/plcell/koaa060	PREDICTED: D-3-phosphoglycerate dehydrogenase 3, chloroplastic-like [Populus euphratica]
Pop_A01G010246	CAD5	AT4G34230	Leaf	Vasculature	10.1093/plcell/koaa060	cinnamyl alcohol dehydrogenase, partial [Salix caprea]
Pop_A04G019546	CYP79B2	AT4G39950	Leaf	Vasculature	10.1093/plcell/koaa060	isoleucine N-monooxygenase 2 [Populus trichocarpa]
Pop_A05G072000	DHS1	AT4G39980	Leaf	Vasculature	10.1093/plcell/koaa060	PREDICTED: phospho-2-dehydro-3-deoxyheptonate aldolase 1, chloroplastic-like [Populus euphratica]
Pop_A02G088631	HB16	AT4G40060	Leaf	Vasculature	10.1093/plcell/koaa060	PREDICTED: homeobox-leucine zipper protein ATHB-6-like [Populus euphratica]
Pop_A06G089457	---	AT5G01210	Leaf	Vasculature	10.1093/plcell/koaa060	BAHD acyltransferase DCR [Populus trichocarpa]
Pop_A06G085732	MOS11	AT5G02770	Leaf	Vasculature	10.1093/plcell/koaa060	protein MODIFIER OF SNC1 11 [Populus trichocarpa]
Pop_A01G074914	---	AT5G03610	Leaf	Vasculature	10.1093/plcell/koaa060	PREDICTED: GDSL esterase/lipase At5g03610-like [Populus euphratica]
Pop_A08G057865	NAC2	AT5G04410	Leaf	Vasculature	10.1093/plcell/koaa060	NAC domain-containing protein 78 isoform X1 [Populus trichocarpa]
Pop_A01G010316	---	AT5G05010	Leaf	Vasculature	10.1093/plcell/koaa060	hypothetical protein POPTR_001G293150 [Populus trichocarpa]
Pop_A10G046609	---	AT5G05100	Leaf	Vasculature	10.1093/plcell/koaa060	R3H domain-containing protein 2 [Populus trichocarpa]
Pop_A10G047124	WEI2	AT5G05730	Leaf	Vasculature	10.1093/plcell/koaa060	anthranilate synthase alpha subunit 1, chloroplastic [Populus trichocarpa]
Pop_A06G053572	---	AT5G06370	Leaf	Vasculature	10.1093/plcell/koaa060	PREDICTED: uncharacterized protein LOC105141034 [Populus euphratica]
Pop_A01G005984	MTHSC70-2	AT5G09590	Leaf	Vasculature	10.1093/plcell/koaa060	heat shock 70 kDa protein, mitochondrial isoform X1 [Populus trichocarpa]
Pop_A05G071659	SULTR2;1	AT5G10180	Leaf	Vasculature	10.1093/plcell/koaa060	hypothetical protein POPTR_005G079000 [Populus trichocarpa]
Pop_A10G046826	---	AT5G10695	Leaf	Vasculature	10.1093/plcell/koaa060	hypothetical protein POPTR_010G251000 [Populus trichocarpa]
Pop_A16G025439	---	AT5G10770	Leaf	Vasculature	10.1093/plcell/koaa060	aspartyl protease family protein At5g10770 [Populus trichocarpa]
Pop_A03G049655	---	AT5G11970	Leaf	Vasculature	10.1093/plcell/koaa060	uncharacterized protein LOC7478174 [Populus trichocarpa]
Pop_A06G053337	HSP17.6II	AT5G12020	Leaf	Vasculature	10.1093/plcell/koaa060	PREDICTED: 17.9 kDa class II heat shock protein-like [Populus euphratica]
Pop_A06G053347	---	AT5G12040	Leaf	Vasculature	10.1093/plcell/koaa060	omega-amidase, chloroplastic [Populus trichocarpa]
Pop_A01G054483	---	AT5G12110	Leaf	Vasculature	10.1093/plcell/koaa060	elongation factor 1-beta 1 [Populus trichocarpa]
Pop_A01G074874	---	AT5G13420	Leaf	Vasculature	10.1093/plcell/koaa060	PREDICTED: uncharacterized protein LOC105133779 [Populus euphratica]
Pop_A08G063507	SULTR4;1	AT5G13550	Leaf	Vasculature	10.1093/plcell/koaa060	hypothetical protein POPTR_008G049500 [Populus trichocarpa]
Pop_A01G067239	SMT1	AT5G13710	Leaf	Vasculature	10.1093/plcell/koaa060	PREDICTED: cycloartenol-C-24-methyltransferase-like [Populus euphratica]
Pop_A01G032135	---	AT5G14240	Leaf	Vasculature	10.1093/plcell/koaa060	PREDICTED: phosducin-like protein 3 [Populus euphratica]
Pop_A01G002203	---	AT5G14450	Leaf	Vasculature	10.1093/plcell/koaa060	GDSL esterase/lipase At5g14450 [Populus trichocarpa]
Pop_A04G026546	---	AT5G16110	Leaf	Vasculature	10.1093/plcell/koaa060	unknown [Populus trichocarpa]
Pop_A13G074175	---	AT5G16450	Leaf	Vasculature	10.1093/plcell/koaa060	dimethylmenaquinone methyltransferase family protein [Populus tomentosa]
Pop_A04G059404	CBR1	AT5G17770	Leaf	Vasculature	10.1093/plcell/koaa060	PREDICTED: NADH--cytochrome b5 reductase 1-like [Populus euphratica]
Pop_G10G000147	---	AT5G19120	Leaf	Vasculature	10.1093/plcell/koaa060	hypothetical protein POPTR_010G110600 [Populus trichocarpa]
Pop_A08G012010	FAF3	AT5G19260	Leaf	Vasculature	10.1093/plcell/koaa060	protein FANTASTIC FOUR 3 [Populus trichocarpa]
Pop_A09G028946	---	AT5G19440	Leaf	Vasculature	10.1093/plcell/koaa060	cinnamoyl-CoA reductase 5 [Populus tomentosa]
Pop_A01G029537	---	AT5G19875	Leaf	Vasculature	10.1093/plcell/koaa060	hypothetical protein POPTR_001G009300 [Populus trichocarpa]
Pop_A01G058721	---	AT5G20890	Leaf	Vasculature	10.1093/plcell/koaa060	T-complex protein 1 subunit beta isoform X1 [Populus trichocarpa]
Pop_A08G006778	---	AT5G20950	Leaf	Vasculature	10.1093/plcell/koaa060	uncharacterized protein LOC7490874 [Populus trichocarpa]
Pop_A02G066301	J2	AT5G22060	Leaf	Vasculature	10.1093/plcell/koaa060	PREDICTED: dnaJ protein homolog 2-like isoform X1 [Populus euphratica]
Pop_A12G007993	---	AT5G23760	Leaf	Vasculature	10.1093/plcell/koaa060	PREDICTED: uncharacterized protein LOC105129657 isoform X2 [Populus euphratica]
Pop_UnG015303	LSU2	AT5G24660	Leaf	Vasculature	10.1093/plcell/koaa060	protein RESPONSE TO LOW SULFUR 2 [Populus trichocarpa]
Pop_A06G062989	BZO2H2	AT5G24800	Leaf	Vasculature	10.1093/plcell/koaa060	basic leucine zipper 9 [Populus trichocarpa]
Pop_A05G016914	---	AT5G26600	Leaf	Vasculature	10.1093/plcell/koaa060	probable L-cysteine desulfhydrase, chloroplastic [Populus trichocarpa]
Pop_A02G066231	PYR6	AT5G26667	Leaf	Vasculature	10.1093/plcell/koaa060	PREDICTED: UMP-CMP kinase 3-like isoform X2 [Populus euphratica]
Pop_A05G071948	GSHB	AT5G27380	Leaf	Vasculature	10.1093/plcell/koaa060	glutathione synthetase, chloroplastic [Populus trichocarpa]
Pop_A12G019296	PPT	AT5G33320	Leaf	Vasculature	10.1093/plcell/koaa060	phosphoenolpyruvate/phosphate translocator 1, chloroplastic [Populus trichocarpa]
Pop_A13G074168	---	AT5G36290	Leaf	Vasculature	10.1093/plcell/koaa060	PREDICTED: GDT1-like protein 4 [Populus euphratica]
Pop_A14G045537	ACS	AT5G36880	Leaf	Vasculature	10.1093/plcell/koaa060	acetyl-coenzyme A synthetase, chloroplastic/glyoxysomal [Populus trichocarpa]
Pop_A12G073739	TCH1	AT5G37780	Leaf	Vasculature	10.1093/plcell/koaa060	calmodulin [Populus trichocarpa]
Pop_A01G059853	---	AT5G42050	Leaf	Vasculature	10.1093/plcell/koaa060	putative uncharacterized protein DDB_G0277255 [Populus trichocarpa]
Pop_A01G059834	RSW9	AT5G42080	Leaf	Vasculature	10.1093/plcell/koaa060	dynamin-related protein 5A isoform X2 [Populus trichocarpa]
Pop_A01G059916	---	AT5G42090	Leaf	Vasculature	10.1093/plcell/koaa060	protein GPR107 [Populus trichocarpa]
Pop_A02G005008	---	AT5G42200	Leaf	Vasculature	10.1093/plcell/koaa060	hypothetical protein POPTR_002G017400 [Populus trichocarpa]
Pop_A04G018399	---	AT5G42570	Leaf	Vasculature	10.1093/plcell/koaa060	B-cell receptor-associated protein 31 [Populus trichocarpa]
Pop_A08G046189	---	AT5G43830	Leaf	Vasculature	10.1093/plcell/koaa060	stem-specific protein TSJT1 [Populus trichocarpa]
Pop_A01G074745	---	AT5G44680	Leaf	Vasculature	10.1093/plcell/koaa060	uncharacterized protein LOC7491462 [Populus trichocarpa]
Pop_A01G003992	BI1	AT5G47120	Leaf	Vasculature	10.1093/plcell/koaa060	bax inhibitor 1 [Populus trichocarpa]
Pop_A04G018274	TDT	AT5G47560	Leaf	Vasculature	10.1093/plcell/koaa060	hypothetical protein POPTR_004G021800 [Populus trichocarpa]
Pop_A06G062420	---	AT5G47720	Leaf	Vasculature	10.1093/plcell/koaa060	acetyl-CoA acetyltransferase, cytosolic 1 isoform X2 [Populus trichocarpa]
Pop_A02G024035	---	AT5G48385	Leaf	Vasculature	10.1093/plcell/koaa060	FRIGIDA-like protein 3 [Populus trichocarpa]
Pop_A02G066340	AAP6	AT5G49630	Leaf	Vasculature	10.1093/plcell/koaa060	amino acid permease 6, partial [Populus tremula x Populus alba]
Pop_A12G019323	FRO8	AT5G50160	Leaf	Vasculature	10.1093/plcell/koaa060	ferric reduction oxidase 8, mitochondrial isoform X2 [Populus trichocarpa]
Pop_A04G029166	HSP90.1	AT5G52640	Leaf	Vasculature	10.1093/plcell/koaa060	hypothetical protein Ahy_A09g042522 [Arachis hypogaea]
Pop_A01G074926	HL	AT5G54390	Leaf	Vasculature	10.1093/plcell/koaa060	0
Pop_A01G058857	---	AT5G55530	Leaf	Vasculature	10.1093/plcell/koaa060	uncharacterized protein LOC7485082 [Populus trichocarpa]
Pop_A01G075801	---	AT5G56460	Leaf	Vasculature	10.1093/plcell/koaa060	hypothetical protein POPTR_001G002300 [Populus trichocarpa]
Pop_A13G082622	SERAT1;1	AT5G56760	Leaf	Vasculature	10.1093/plcell/koaa060	serine acetyltransferase 5 [Populus trichocarpa]
Pop_A06G061415	---	AT5G59550	Leaf	Vasculature	10.1093/plcell/koaa060	PREDICTED: E3 ubiquitin-protein ligase RING1-like [Populus euphratica]
Pop_A09G059534	EXO70H7	AT5G59730	Leaf	Vasculature	10.1093/plcell/koaa060	exocyst complex component EXO70H1 [Populus trichocarpa]
Pop_A15G017244	---	AT5G60980	Leaf	Vasculature	10.1093/plcell/koaa060	PREDICTED: putative G3BP-like protein isoform X3 [Populus euphratica]
Pop_A15G084341	---	AT5G61660	Leaf	Vasculature	10.1093/plcell/koaa060	PREDICTED: glycine-rich cell wall structural protein 2-like isoform X1 [Populus euphratica]
Pop_A08G086475	---	AT5G62890	Leaf	Vasculature	10.1093/plcell/koaa060	nucleobase-ascorbate transporter 7 [Populus trichocarpa]
Pop_A12G067981	FP3	AT5G63530	Leaf	Vasculature	10.1093/plcell/koaa060	PREDICTED: muscle M-line assembly protein unc-89-like [Populus euphratica]
Pop_A01G010137	ATAGP1	AT5G64310	Leaf	Vasculature	10.1093/plcell/koaa060	0
Pop_A09G015355	GTE7	AT5G65630	Leaf	Vasculature	10.1093/plcell/koaa060	hypothetical protein POPTR_009G080000 [Populus trichocarpa]
Pop_A02G005572	IAA9	AT5G65670	Leaf	Vasculature	10.1093/plcell/koaa060	auxin-responsive protein IAA8 [Populus tomentosa]
Pop_A03G049862	---	AT5G67150	Leaf	Vasculature	10.1093/plcell/koaa060	HXXXD-type acyl-transferase family protein [Populus tomentosa]
Pop_A05G073432	---	AT5G67350	Leaf	Vasculature	10.1093/plcell/koaa060	PREDICTED: uncharacterized protein LOC105115352 [Populus euphratica]
Pop_A06G053384	HB-8	AT4G32880	Leaf	Xylem	10.1104/pp.126.2.643	truncated hemoglobin [Populus tomentosa]
Pop_A02G066340	AAP6	AT5G49630	Leaf	Xylem	10.1074/jbc.M207730200	amino acid permease 6, partial [Populus tremula x Populus alba]

## Sheet:  Table S3
Table S3: Marker genes list of tender leaves cell_clusters 0 to 9 . (logFC.threshold > 0.25; min.pct > 0.25 )
gene	p_val	avg_logFC	pct.1	pct.2	p_val_adj	cluster	symbol ID
Pop_A01G032338	3.36484e-13	0.253102	0.411	0.602	1.28557e-08	0	Hsp70-15
Pop_A01G032346	1.42261e-10	0.274961	0.313	0.435	5.43523e-06	0	PEN3
Pop_A01G080079	2.09434e-34	0.423442	0.683	0.781	8.00164e-30	0	PDR12
Pop_A02G023860	6.00101e-18	0.357126	0.626	0.748	2.29275e-13	0	ACO3
Pop_A02G066245	1.71642e-08	0.250405	0.312	0.431	0.000655777	0	---
Pop_A03G019776	2.66414e-13	0.260784	0.34	0.494	1.01786e-08	0	DPL1
Pop_A03G019942	1.61366e-09	0.26329	0.396	0.539	6.16516e-05	0	PDR12
Pop_A03G050143	6.00834e-07	0.467805	0.484	0.668	0.0229554	0	RPS7.2
Pop_A03G050365	1.41921e-12	0.734246	0.285	0.274	5.42224e-08	0	YCF2.1
Pop_A04G029333	6.46838e-10	0.347175	0.587	0.741	2.47131e-05	0	---
Pop_A05G001854	1.3795e-14	0.250457	0.274	0.4	5.27052e-10	0	PAPK1
Pop_A05G056304	3.15081e-25	0.385517	0.629	0.721	1.2038e-20	0	---
Pop_A06G063029	1.15493e-176	0.420561	0.917	0.928	4.41251e-172	0	HA5
Pop_A06G063104	4.02605e-12	0.395186	0.66	0.806	1.53819e-07	0	---
Pop_A06G085752	4.20389e-10	0.257964	0.339	0.478	1.60614e-05	0	---
Pop_A07G085213	1.86913e-30	0.392618	0.357	0.551	7.14122e-26	0	---
Pop_A07G085219	1.65781e-32	0.614903	0.774	0.868	6.33383e-28	0	PSBC
Pop_A09G014454	5.97456e-12	0.278359	0.267	0.38	2.28264e-07	0	TRFL2
Pop_A11G021610	1.60365e-08	0.286375	0.32	0.435	0.000612689	0	CYP72A15
Pop_A11G026215	9.48363e-16	0.25422	0.36	0.528	3.62332e-11	0	CPK21
Pop_A11G056457	2.6622e-08	0.266619	0.345	0.482	0.00101712	0	NEV
Pop_A12G019330	5.71348e-15	0.317772	0.291	0.426	2.18289e-10	0	NBR1
Pop_A12G027510	9.27677e-08	0.302158	0.251	0.344	0.00354428	0	---
Pop_A12G068075	3.5403e-37	0.400845	0.7	0.841	1.35261e-32	0	---
Pop_A13G082589	1.1221e-09	0.28002	0.253	0.354	4.28708e-05	0	---
Pop_A14G044909	7.06722e-11	0.253909	0.306	0.424	2.7001e-06	0	UBDK GAMMA 4
Pop_A15G049037	9.06198e-08	0.268278	0.215	0.291	0.00346222	0	---
Pop_A18G018777	2.33949e-27	0.517964	0.564	0.645	8.93827e-23	0	SnRK3.4
Pop_G01G004886	5.38572e-09	0.299208	0.495	0.666	0.000205767	0	LOX3
Pop_G01G013368	7.60262e-16	0.273811	0.227	0.336	2.90466e-11	0	---
Pop_G01G074549	5.85407e-61	0.429835	0.759	0.832	2.23661e-56	0	PDR12
Pop_G01G081971	9.75488e-16	0.274667	0.275	0.402	3.72695e-11	0	---
Pop_G02G016002	1.50548e-25	0.371274	0.649	0.748	5.75184e-21	0	ACO3
Pop_G02G016087	3.44068e-15	0.251313	0.707	0.824	1.31455e-10	0	---
Pop_G04G011171	2.99203e-18	0.299953	0.641	0.749	1.14313e-13	0	MUB1
Pop_G04G028135	2.68804e-20	0.345241	0.712	0.82	1.02699e-15	0	SPE2
Pop_G04G066776	8.88232e-27	0.267943	0.725	0.804	3.39358e-22	0	AOC3
Pop_G05G008137	1.38031e-08	0.328005	0.234	0.319	0.000527363	0	SULTR1;3
Pop_G05G018000	1.46998e-90	0.326388	0.878	0.91	5.61619e-86	0	---
Pop_G05G074065	3.93715e-17	0.253074	0.334	0.492	1.50423e-12	0	---
Pop_G08G058586	2.86988e-11	0.273671	0.284	0.4	1.09647e-06	0	NTMC2TYPE5.2
Pop_G09G011702	2.24734e-46	0.467344	0.655	0.745	8.58617e-42	0	---
Pop_G09G015124	2.29842e-12	0.338408	0.602	0.727	8.78134e-08	0	GH3.1
Pop_G09G031997	2.95367e-19	0.362838	0.22	0.337	1.12848e-14	0	PSAA
Pop_G09G031998	8.55635e-12	0.377758	0.204	0.292	3.26904e-07	0	PSAB
Pop_G09G032003	6.85249e-08	0.462811	0.217	0.297	0.00261806	0	RPOB
Pop_G09G032004	5.21145e-12	0.60533	0.631	0.755	1.99109e-07	0	RPS2
Pop_G09G032006	1.46463e-26	0.386311	0.245	0.388	5.59576e-22	0	ATPI
Pop_G09G077290	1.49586e-13	0.277472	0.266	0.386	5.71507e-09	0	ATG2
Pop_G10G001640	5.06264e-46	0.289364	0.802	0.858	1.93423e-41	0	STP13
Pop_G10G048268	4.56711e-32	0.325842	0.704	0.822	1.74491e-27	0	---
Pop_G12G007958	2.28119e-65	0.325455	0.836	0.883	8.71552e-61	0	SUVH5
Pop_G13G022301	4.98659e-08	0.323518	0.219	0.299	0.00190518	0	CKI1
Pop_G15G048876	5.12014e-08	0.272026	0.249	0.338	0.0019562	0	ATB BETA
Pop_G18G080147	2.61659e-42	0.573633	0.578	0.642	9.99694e-38	0	SnRK3.4
Pop_G19G009795	4.21539e-14	0.280076	0.301	0.437	1.61053e-09	0	---
Pop_G19G080842	3.30384e-09	0.265443	0.335	0.47	0.000126226	0	---
Pop_G19G084179	1.24206e-113	0.276828	0.927	0.969	4.74542e-109	0	RPL10B
Pop_A01G004126	1.01456e-131	0.366458	0.373	0.171	3.87624e-127	1
Pop_A01G004582	4.33092e-187	0.355202	0.855	0.573	1.65467e-182	1	Hop3
Pop_A01G010338	2.85618e-201	0.358259	0.39	0.147	1.09123e-196	1	---
Pop_A01G011827	1.14074e-125	0.443191	0.498	0.278	4.35829e-121	1	OXS3
Pop_A01G029569	5.08792e-231	0.539164	0.349	0.114	1.94389e-226	1
Pop_A01G054780	6.09373e-186	0.393847	0.712	0.419	2.32817e-181	1	---
Pop_A01G057025	2.46619e-188	0.465429	0.711	0.424	9.42231e-184	1	---
Pop_A01G059931	9.84145e-137	0.337777	0.409	0.198	3.76002e-132	1	---
Pop_A01G074953	5.07098e-152	0.434202	0.835	0.581	1.93742e-147	1	---
Pop_A01G074959	3.0026e-88	0.396723	0.867	0.735	1.14717e-83	1	---
Pop_A01G079964	9.50975e-113	0.323439	0.865	0.652	3.63329e-108	1	REF
Pop_A01G080019	6.79589e-240	0.526869	0.865	0.589	2.59644e-235	1	Hsp70b
Pop_A01G080026	2.37912e-106	0.373766	0.382	0.195	9.08968e-102	1	Toc12
Pop_A01G081839	1.06633e-101	0.294781	0.369	0.189	4.07403e-97	1	---
Pop_A01G081882	2.7515e-122	0.265964	0.849	0.601	1.05124e-117	1	Hsp81.4
Pop_A02G004962	1.5012e-299	0.865409	0.866	0.58	5.7355e-295	1	---
Pop_A02G004966	1.54881e-68	0.273006	0.262	0.131	5.91737e-64	1	---
Pop_A02G005380	9.39088e-172	0.305702	0.556	0.286	3.58788e-167	1	PDS1
Pop_A02G012271	1.50216e-211	0.344078	0.488	0.214	5.73917e-207	1	---
Pop_A02G012322	2.96511e-95	0.290663	0.279	0.128	1.13285e-90	1	---
Pop_A02G012323	1.47435e-154	0.304809	0.865	0.597	5.63288e-150	1	BAG6
Pop_A02G012616	4.34033e-122	0.302263	0.895	0.675	1.65827e-117	1	CP12-2
Pop_A02G012673	1.19098e-160	0.362436	0.762	0.48	4.55024e-156	1	HRE2
Pop_A02G024015	1.10771e-103	0.252237	0.747	0.519	4.2321e-99	1	---
Pop_A02G031350	4.24512e-84	0.287638	0.794	0.577	1.62189e-79	1	GSTF6
Pop_A02G065575	2.44684e-165	0.580853	0.692	0.422	9.34841e-161	1	ATADH1
Pop_A02G066119	4.62817e-120	0.250719	0.598	0.347	1.76824e-115	1	RAP2.1
Pop_A03G020132	1.68812e-241	0.509933	0.693	0.374	6.44965e-237	1	---
Pop_A03G049850	7.49152e-119	0.260273	0.872	0.631	2.86221e-114	1	Hsp70-15
Pop_A03G049956	9.41523e-152	0.26752	0.337	0.137	3.59718e-147	1	---
Pop_A03G049987	4.48451e-281	0.636563	0.674	0.344	1.71335e-276	1	---
Pop_A03G050005	7.59669e-112	0.318726	0.427	0.221	2.90239e-107	1	PME1
Pop_A03G050043	7.87695e-201	0.472732	0.382	0.147	3.00947e-196	1	HSP23.6-MITO
Pop_A03G050449	1.13931e-154	0.355008	0.908	0.679	4.35283e-150	1	Hop3
Pop_A03G050465	1.22906e-81	0.258872	0.715	0.491	4.69573e-77	1	---
Pop_A03G050467	3.88267e-173	0.359606	0.641	0.356	1.48341e-168	1	---
Pop_A03G076452	3.09558e-220	0.377803	0.766	0.442	1.1827e-215	1	Cpn60beta2
Pop_A03G080575	8.03633e-235	0.332531	0.515	0.221	3.07036e-230	1	---
Pop_A04G002700	1.04107e-249	0.367577	0.537	0.23	3.9775e-245	1	SLP
Pop_A04G010823	1.6065e-130	0.377736	0.713	0.448	6.13781e-126	1	---
Pop_A04G018063	7.15701e-203	0.583936	0.747	0.456	2.73441e-198	1	---
Pop_A04G018139	5.46325e-120	0.47976	0.59	0.363	2.08729e-115	1	---
Pop_A04G019469	4.33869e-195	0.517308	0.811	0.529	1.65764e-190	1	---
Pop_A04G029166	2.96643e-240	0.490573	0.843	0.54	1.13335e-235	1	HSP90.1
Pop_A04G029253	2.87261e-186	0.270188	0.541	0.263	1.09751e-181	1	---
Pop_A04G059456	3.93407e-159	0.266545	0.695	0.41	1.50305e-154	1	HSC70-7
Pop_A04G060174	1.0624e-130	0.449469	0.714	0.475	4.05902e-126	1	---
Pop_A04G060285	1.90721e-263	0.609171	0.922	0.719	7.28667e-259	1	---
Pop_A04G060296	3.36942e-182	0.474466	0.901	0.689	1.28732e-177	1	---
Pop_A04G060309	4.22803e-120	0.336719	0.98	0.911	1.61536e-115	1	---
Pop_A04G060370	4.85142e-141	0.254696	0.853	0.576	1.85353e-136	1	U2AF35B
Pop_A04G070588	5.69251e-69	0.288007	0.346	0.194	2.17488e-64	1	HIPP26
Pop_A05G011540	2.69003e-131	0.410773	0.689	0.428	1.02775e-126	1	---
Pop_A05G056338	6.35874e-134	0.294023	0.897	0.666	2.42942e-129	1	---
Pop_A05G057049	6.59949e-240	0.360037	0.384	0.131	2.5214e-235	1	LAC14
Pop_A05G072915	2.34669e-152	0.260088	0.687	0.407	8.96575e-148	1	SCE1A
Pop_A05G073127	1.33741e-254	0.430415	0.36	0.113	5.10972e-250	1	HIS1-3
Pop_A06G053309	0	0.476532	0.573	0.211	0	1	HSFA2
Pop_A06G053337	8.59077e-105	0.252648	0.87	0.663	3.28219e-100	1	HSP17.6II
Pop_A06G053382	4.21158e-93	0.284833	0.707	0.483	1.60908e-88	1	---
Pop_A06G061573	2.32221e-160	0.301828	0.387	0.166	8.87225e-156	1	---
Pop_A06G062402	3.70599e-140	0.431688	0.264	0.098	1.41591e-135	1	---
Pop_A06G062927	8.33973e-199	0.278434	0.658	0.337	3.18628e-194	1	HSP98.7
Pop_A06G064792	4.86661e-74	0.272291	0.724	0.513	1.85934e-69	1	---
Pop_A06G064892	9.37694e-142	0.270162	0.625	0.359	3.58255e-137	1	TET8
Pop_A06G079388	6.79704e-193	0.332804	0.744	0.432	2.59688e-188	1	CPN21
Pop_A06G089512	8.8921e-141	0.319655	0.432	0.206	3.39731e-136	1	---
Pop_A07G085224	3.3408e-39	0.258117	0.574	0.424	1.27639e-34	1	ERF9
Pop_A08G006979	1.61164e-170	0.284247	0.639	0.348	6.15742e-166	1	---
Pop_A08G058011	7.15903e-198	0.371809	0.48	0.212	2.73518e-193	1	---
Pop_A08G063395	7.45447e-166	0.554779	0.92	0.78	2.84805e-161	1	---
Pop_A08G063398	5.93181e-222	0.61423	0.924	0.757	2.26631e-217	1	---
Pop_A08G063650	5.58234e-70	0.331252	0.702	0.515	2.13279e-65	1	RNS1
Pop_A08G063656	1.16434e-143	0.370675	0.757	0.494	4.44849e-139	1	---
Pop_A08G064043	1.81861e-87	0.326338	0.31	0.158	6.94819e-83	1	---
Pop_A08G064200	6.60865e-168	0.476926	0.667	0.389	2.5249e-163	1	---
Pop_A08G086482	5.31734e-82	0.39558	0.335	0.18	2.03154e-77	1	---
Pop_A09G014470	4.33791e-222	0.493011	0.511	0.228	1.65734e-217	1	---
Pop_A09G014519	3.9957e-131	0.321123	0.988	0.942	1.5266e-126	1	---
Pop_A09G026551	0	0.435758	0.519	0.186	0	1	MEE14
Pop_A09G026597	5.08565e-106	0.87364	0.334	0.164	1.94302e-101	1	---
Pop_A09G029031	1.89824e-161	0.332331	0.673	0.393	7.25243e-157	1	---
Pop_A09G029032	4.67792e-152	0.370728	0.974	0.862	1.78725e-147	1	---
Pop_A09G076828	3.51347e-172	0.358387	0.76	0.467	1.34236e-167	1	---
Pop_A09G076831	4.07357e-169	0.418042	0.981	0.882	1.55635e-164	1	---
Pop_A09G083579	3.02726e-157	0.327005	0.892	0.643	1.1566e-152	1	J2
Pop_A10G001688	1.27623e-234	0.570631	0.901	0.647	4.87598e-230	1	---
Pop_A10G047067	2.15701e-101	0.319894	0.923	0.761	8.24109e-97	1	Hsp20
Pop_A10G047508	5.54153e-56	0.255749	0.921	0.786	2.1172e-51	1	GAPC1
Pop_A10G047532	0	0.755713	0.929	0.643	0	1	HSP21
Pop_A10G048400	1.50121e-208	0.430165	0.903	0.656	5.73552e-204	1	---
Pop_A10G048629	2.66676e-249	0.3534	0.617	0.279	1.01886e-244	1	HSP70T-2
Pop_A10G069049	1.50231e-86	0.301458	0.666	0.447	5.73972e-82	1	TEM1
Pop_A10G069485	6.11863e-86	0.319158	0.626	0.419	2.33768e-81	1	HSP20-like
Pop_A11G020316	6.84742e-192	0.293672	0.331	0.114	2.61613e-187	1	LHCB3*1
Pop_A11G020354	1.79198e-125	0.294131	0.601	0.35	6.84642e-121	1	---
Pop_A11G056517	0	0.457299	0.512	0.184	0	1	HSA32
Pop_A11G056589	1.28904e-238	0.51872	0.797	0.496	4.9249e-234	1	---
Pop_A11G056784	1.36923e-53	0.254034	0.658	0.484	5.23127e-49	1	---
Pop_A11G086330	5.19582e-125	0.320809	0.945	0.774	1.98511e-120	1	---
Pop_A12G008027	2.88936e-130	0.311593	0.329	0.144	1.10391e-125	1	---
Pop_A12G068045	8.0476e-170	0.278729	0.701	0.4	3.07467e-165	1	KING1
Pop_A12G081583	9.42726e-79	0.684497	0.508	0.339	3.60178e-74	1	HSP21
Pop_A13G054394	5.65314e-200	0.513847	0.832	0.561	2.15984e-195	1	---
Pop_A13G054446	1.88751e-147	0.540423	0.827	0.622	7.21142e-143	1	---
Pop_A14G000067	6.82358e-238	0.500276	0.837	0.54	2.60702e-233	1	---
Pop_A14G000717	6.92908e-129	0.339352	0.359	0.164	2.64732e-124	1	EXL2
Pop_A14G000720	6.97744e-137	0.286256	0.856	0.594	2.6658e-132	1	HRE2
Pop_A14G000743	1.01814e-165	0.396957	0.663	0.383	3.88992e-161	1	SAG21
Pop_A14G000767	5.75505e-209	0.336299	0.641	0.336	2.19877e-204	1	---
Pop_A14G029890	9.63487e-200	0.333517	0.326	0.112	3.6811e-195	1	---
Pop_A14G044024	3.63878e-205	0.422831	0.57	0.28	1.39023e-200	1	GolS1
Pop_A14G044927	2.03356e-76	0.253713	0.886	0.684	7.76942e-72	1	---
Pop_A14G045010	2.60028e-247	0.410502	0.406	0.141	9.93462e-243	1	TIP
Pop_A14G090720	9.76266e-141	0.329983	0.528	0.284	3.72992e-136	1	PAR2
Pop_A15G017228	1.50464e-258	0.501126	0.863	0.552	5.74864e-254	1	HSP101
Pop_A15G017229	2.11411e-222	0.474849	0.963	0.777	8.07717e-218	1	HSP101
Pop_A15G076603	3.12476e-91	0.255848	0.704	0.483	1.19385e-86	1	SRp34a
Pop_A15G084328	5.47104e-127	0.256958	0.779	0.52	2.09026e-122	1	PMSR4
Pop_A16G028798	6.79984e-172	0.316127	0.586	0.304	2.59795e-167	1	---
Pop_A16G033763	1.60928e-57	0.27192	0.883	0.721	6.14843e-53	1	YLS9
Pop_A16G055276	9.97139e-170	0.253876	0.564	0.288	3.80967e-165	1	---
Pop_A17G020378	3.35825e-191	0.335372	0.606	0.313	1.28305e-186	1	CLPB3
Pop_A17G020603	1.03674e-281	0.503497	0.337	0.092	3.96098e-277	1	FTSH6
Pop_A17G027625	1.12369e-129	0.279146	0.861	0.613	4.29317e-125	1	---
Pop_A17G052691	5.6123e-117	0.281192	0.663	0.406	2.14423e-112	1	TAT7
Pop_A17G052721	3.20378e-46	0.356481	0.533	0.379	1.22404e-41	1	---
Pop_A17G075176	4.99776e-240	0.576409	0.786	0.49	1.90944e-235	1	---
Pop_A18G012747	6.81324e-115	0.307811	0.443	0.237	2.60307e-110	1	---
Pop_A18G012763	4.67771e-73	0.25368	0.511	0.321	1.78717e-68	1	---
Pop_A18G018623	8.74742e-185	0.254577	0.398	0.16	3.34204e-180	1	---
Pop_A18G018801	3.08328e-133	0.257064	0.535	0.287	1.178e-128	1	FBL6
Pop_A18G018973	6.48925e-84	0.277852	0.955	0.809	2.47928e-79	1	MBF1C
Pop_A18G018999	1.00586e-188	0.362117	0.549	0.266	3.84301e-184	1	---
Pop_A18G035976	6.57967e-232	0.438115	0.769	0.448	2.51383e-227	1	---
Pop_A18G083152	2.01526e-239	0.424216	0.517	0.224	7.6995e-235	1	CPN21
Pop_A19G053066	1.41536e-115	0.453426	0.905	0.73	5.40753e-111	1	---
Pop_A19G054952	5.36982e-136	0.285351	0.299	0.118	2.0516e-131	1	---
Pop_G01G002932	5.02322e-188	0.281451	0.345	0.126	1.91917e-183	1	---
Pop_G01G004348	7.60151e-169	0.328209	0.858	0.581	2.90423e-164	1	Hop3
Pop_G01G004594	8.57444e-118	0.414853	0.504	0.281	3.27595e-113	1	TIFY11B
Pop_G01G013390	3.45358e-158	0.386792	0.391	0.17	1.31948e-153	1	---
Pop_G01G020930	3.71047e-154	0.380373	0.637	0.367	1.41762e-149	1	---
Pop_G01G067375	1.67585e-228	0.386961	0.395	0.141	6.40275e-224	1	---
Pop_G01G074566	5.34398e-92	0.252073	0.566	0.352	2.04172e-87	1	PP2-B1
Pop_G01G075615	2.94174e-109	0.353354	0.366	0.182	1.12392e-104	1	Toc12
Pop_G01G075659	2.02001e-209	0.468339	0.864	0.597	7.71767e-205	1	Hsp70b
Pop_G01G079699	2.19735e-190	0.632838	0.656	0.38	8.39519e-186	1	---
Pop_G02G005212	7.30614e-172	0.268415	0.5	0.238	2.79138e-167	1	---
Pop_G02G005291	1.41051e-119	0.344783	0.391	0.193	5.38901e-115	1	PIN6
Pop_G02G015785	1.79816e-178	0.352993	0.881	0.612	6.87007e-174	1	ROF1
Pop_G02G015851	7.84784e-84	0.265032	0.965	0.861	2.99835e-79	1	---
Pop_G02G024152	3.50505e-67	0.264187	0.95	0.827	1.33914e-62	1	NIMIN1
Pop_G02G024333	9.37239e-119	0.314487	0.875	0.639	3.58081e-114	1	HRE2
Pop_G02G030993	7.54133e-145	0.302389	0.941	0.735	2.88124e-140	1	BAG6
Pop_G02G065406	7.65621e-209	0.380471	0.552	0.265	2.92513e-204	1	PDS1
Pop_G02G065438	2.2388e-71	0.317021	0.628	0.432	8.55355e-67	1	XTR7
Pop_G02G066026	4.48679e-213	0.281112	0.34	0.113	1.71422e-208	1	PSB27
Pop_G03G010554	4.41303e-160	0.258552	0.336	0.132	1.68604e-155	1	---
Pop_G03G011261	1.20193e-289	0.781145	0.833	0.549	4.5921e-285	1	---
Pop_G03G013492	4.15198e-192	0.28011	0.48	0.217	1.58631e-187	1	---
Pop_G03G013613	5.32651e-211	0.281028	0.515	0.227	2.03505e-206	1	---
Pop_G03G013944	2.61151e-213	0.529412	0.657	0.354	9.97755e-209	1	---
Pop_G03G050614	1.04482e-148	0.415488	0.43	0.204	3.99184e-144	1	TMP-C
Pop_G03G055849	3.54751e-48	0.314181	0.359	0.229	1.35536e-43	1	---
Pop_G03G056361	1.79596e-207	0.285351	0.488	0.211	6.86164e-203	1	---
Pop_G03G076327	0	0.540285	0.595	0.235	0	1	---
Pop_G03G078232	1.66051e-136	0.365074	0.657	0.401	6.34414e-132	1	---
Pop_G03G078250	1.09333e-135	0.3081	0.894	0.659	4.17719e-131	1	Hop3
Pop_G03G078296	8.91675e-179	0.368801	0.993	0.928	3.40673e-174	1	HSP23.6-MITO
Pop_G04G023336	6.09054e-101	0.265254	0.674	0.433	2.32695e-96	1	RIN4
Pop_G04G023408	1.41444e-117	0.480706	0.613	0.384	5.40402e-113	1	---
Pop_G04G023413	2.68997e-290	0.54259	0.691	0.34	1.02773e-285	1	---
Pop_G04G028125	1.78431e-193	0.569747	0.937	0.748	6.81715e-189	1	---
Pop_G04G028297	1.60831e-95	0.284498	0.839	0.594	6.14473e-91	1	GRP8
Pop_G04G059200	1.03183e-168	0.274722	0.597	0.319	3.9422e-164	1	SLP
Pop_G04G060058	4.69578e-133	0.305075	0.372	0.169	1.79407e-128	1	---
Pop_G04G066488	2.26701e-212	0.44431	0.776	0.458	8.66134e-208	1	HSP90.1
Pop_G04G066570	8.50021e-245	0.394692	0.625	0.302	3.24759e-240	1	---
Pop_G04G079204	3.048e-121	0.433707	0.474	0.265	1.16452e-116	1	---
Pop_G05G008194	5.01607e-254	0.33327	0.43	0.155	1.91644e-249	1	---
Pop_G05G008443	3.67636e-128	0.272122	0.915	0.702	1.40459e-123	1	---
Pop_G05G008605	5.83366e-206	0.453633	0.394	0.15	2.22881e-201	1	---
Pop_G05G008791	1.43443e-93	0.442446	0.285	0.135	5.48038e-89	1	EMB975
Pop_G05G008805	1.44952e-175	0.27516	0.282	0.094	5.53804e-171	1	---
Pop_G05G017661	4.11595e-191	0.374561	0.405	0.164	1.57254e-186	1	SEN1
Pop_G05G017763	2.0266e-306	0.736328	0.588	0.253	7.74285e-302	1	HIS1-3
Pop_G05G017899	3.17876e-115	0.284697	0.26	0.104	1.21448e-110	1	---
Pop_G05G057169	1.71141e-50	0.28482	0.271	0.154	6.53861e-46	1	---
Pop_G05G057493	8.14212e-147	0.306369	0.335	0.139	3.11078e-142	1	PETE1
Pop_G05G069868	3.16349e-102	0.294593	0.754	0.521	1.20864e-97	1	SRC2
Pop_G05G073556	2.69888e-116	0.349972	0.676	0.425	1.03114e-111	1	---
Pop_G05G085074	5.72209e-101	0.272319	0.974	0.854	2.18618e-96	1	SCE1A
Pop_G06G003469	1.97937e-265	0.548569	0.685	0.354	7.56238e-261	1	COPT5
Pop_G06G003546	3.02112e-244	0.39133	0.47	0.182	1.15425e-239	1	HSFA2
Pop_G06G003752	1.05533e-189	0.323332	0.717	0.418	4.032e-185	1	---
Pop_G06G003781	5.73497e-160	0.258018	0.729	0.431	2.1911e-155	1	SR33
Pop_G06G034872	5.85616e-40	0.294345	0.317	0.201	2.23741e-35	1	---
Pop_G06G035503	2.92847e-178	0.369717	0.809	0.532	1.11885e-173	1	---
Pop_G06G051385	3.70124e-159	0.282041	0.78	0.486	1.4141e-154	1	---
Pop_G06G051494	2.78139e-168	0.286133	0.688	0.395	1.06266e-163	1	CPN21
Pop_G06G051813	1.32752e-105	0.268124	0.928	0.736	5.07192e-101	1	Fes1A
Pop_G06G075978	9.93873e-171	0.389441	0.91	0.677	3.79719e-166	1	---
Pop_G06G075981	9.18677e-148	0.364092	0.829	0.562	3.5099e-143	1	SIP2
Pop_G07G032567	2.21369e-109	0.300051	0.94	0.786	8.45763e-105	1	---
Pop_G07G061200	1.04314e-93	0.35818	0.663	0.455	3.98544e-89	1	PSAN
Pop_G07G061884	3.55324e-120	0.315307	0.416	0.205	1.35755e-115	1	---
Pop_G08G057869	1.79358e-246	0.648976	0.885	0.665	6.85253e-242	1	---
Pop_G08G058422	1.36602e-156	0.385103	0.406	0.178	5.21901e-152	1	TEM1
Pop_G08G058604	3.74451e-136	0.44752	0.543	0.303	1.43063e-131	1	---
Pop_G08G058609	1.04638e-168	0.419001	0.75	0.47	3.9978e-164	1	---
Pop_G08G063522	4.12565e-279	0.834918	0.55	0.237	1.57625e-274	1	---
Pop_G08G064141	6.76287e-270	0.48928	0.841	0.519	2.58382e-265	1	---
Pop_G09G011629	4.2912e-92	0.309479	0.607	0.377	1.6395e-87	1	HMGR1
Pop_G09G014036	6.78584e-212	0.557519	0.614	0.313	2.5926e-207	1	---
Pop_G09G027802	1.93208e-133	0.271396	0.919	0.691	7.3817e-129	1	J2
Pop_G09G051129	8.50183e-96	0.347701	0.961	0.87	3.24821e-91	1	---
Pop_G09G051130	7.56448e-126	0.378309	0.933	0.776	2.89008e-121	1	---
Pop_G09G077227	0	0.849826	0.794	0.41	0	1	MEE14
Pop_G09G077372	5.69788e-236	0.360015	0.68	0.358	2.17693e-231	1	TIC21
Pop_G10G000171	1.3725e-186	0.352975	0.76	0.47	5.24378e-182	1	---
Pop_G10G001520	1.47818e-77	0.269934	0.264	0.129	5.64753e-73	1	---
Pop_G10G006104	2.23798e-192	0.305186	0.531	0.255	8.55042e-188	1	---
Pop_G10G007208	1.21041e-67	0.331825	0.562	0.384	4.62451e-63	1	---
Pop_G10G007338	9.26052e-84	0.402707	0.736	0.547	3.53807e-79	1	DHAR2
Pop_G10G027145	4.44541e-304	0.635707	0.845	0.526	1.69841e-299	1	HSP21
Pop_G10G047625	1.51232e-106	0.311762	0.474	0.266	5.77798e-102	1	---
Pop_G10G047975	1.11775e-103	0.315728	0.988	0.936	4.27046e-99	1	---
Pop_G10G048032	1.43062e-210	0.327012	0.744	0.427	5.46582e-206	1	ECHIA
Pop_G10G048060	4.46201e-89	0.284958	0.354	0.188	1.70475e-84	1	bZIP1
Pop_G10G048381	1.22824e-221	0.646395	0.859	0.608	4.69263e-217	1	---
Pop_G10G060735	2.20809e-175	0.467623	0.426	0.189	8.43624e-171	1	HSFA6B
Pop_G11G077730	3.91247e-85	0.285649	0.694	0.474	1.4948e-80	1	RAP2.5
Pop_G12G084765	1.02122e-162	0.473018	0.378	0.163	3.90168e-158	1	---
Pop_G13G022244	1.26759e-171	0.565526	0.646	0.375	4.84295e-167	1	---
Pop_G13G022300	7.13614e-153	0.365628	0.777	0.506	2.72643e-148	1	---
Pop_G13G024462	2.74764e-177	0.277743	0.38	0.15	1.04976e-172	1	---
Pop_G13G026957	2.0803e-140	0.368598	0.406	0.194	7.948e-136	1	RMA1
Pop_G14G000556	1.86555e-89	0.310083	0.795	0.608	7.12754e-85	1	ROF2
Pop_G14G023574	9.62539e-130	0.317246	0.789	0.518	3.67748e-125	1	CYSC1
Pop_G14G044589	1.35548e-217	0.439598	0.829	0.536	5.17875e-213	1	---
Pop_G14G045179	0	0.799073	0.543	0.208	0	1	---
Pop_G14G045199	1.47586e-134	0.333024	0.939	0.752	5.63869e-130	1	HRE2
Pop_G15G015203	7.76638e-140	0.460013	0.779	0.514	2.96722e-135	1	CB5-E
Pop_G15G015234	1.52315e-117	0.445065	0.475	0.265	5.81933e-113	1	---
Pop_G15G017290	6.78621e-131	0.26548	0.264	0.1	2.59274e-126	1	MLS
Pop_G15G049166	4.8141e-203	0.347501	0.578	0.278	1.83928e-198	1	HSP101
Pop_G15G049167	1.97696e-250	0.500274	0.908	0.634	7.55316e-246	1	HSP101
Pop_G16G016429	7.90028e-220	0.355319	0.675	0.354	3.01838e-215	1	---
Pop_G16G057565	5.45517e-53	0.268833	0.963	0.87	2.0842e-48	1	YLS9
Pop_G16G068715	7.30818e-129	0.552707	0.394	0.194	2.79216e-124	1	---
Pop_G17G021062	3.67773e-125	0.385574	0.298	0.124	1.40511e-120	1	---
Pop_G17G021063	8.74673e-47	0.313125	0.412	0.274	3.34178e-42	1	---
Pop_G17G033254	5.27291e-236	0.58987	0.774	0.482	2.01457e-231	1	---
Pop_G17G033277	4.46595e-63	0.284223	0.815	0.628	1.70626e-58	1	---
Pop_G17G067053	2.22742e-161	0.527859	0.306	0.116	8.51008e-157	1	FTSH6
Pop_G18G011112	7.57113e-133	0.337497	0.545	0.304	2.89262e-128	1	---
Pop_G18G019101	6.59114e-113	0.330702	0.473	0.258	2.51821e-108	1	---
Pop_G18G019151	8.22128e-169	0.274764	0.444	0.2	3.14102e-164	1	---
Pop_G18G019202	2.15667e-193	0.435712	0.729	0.423	8.23979e-189	1	IAA12
Pop_G18G078316	1.03151e-153	0.259423	0.428	0.197	3.94099e-149	1	COL4
Pop_G18G078460	1.80779e-123	0.340814	0.992	0.932	6.90684e-119	1	---
Pop_G18G083220	1.0578e-154	0.383206	0.96	0.794	4.04143e-150	1	MBF1C
Pop_G18G085877	3.06436e-226	0.414125	0.624	0.312	1.17077e-221	1	CPN21
Pop_G18G086273	3.12767e-263	0.497117	0.71	0.372	1.19496e-258	1	---
Pop_G19G009775	7.78536e-200	0.50267	0.785	0.505	2.97448e-195	1	---
Pop_G19G021896	3.0891e-210	0.501635	0.763	0.462	1.18022e-205	1	MSD1
Pop_G19G084061	1.45674e-93	0.308648	0.312	0.15	5.5656e-89	1	---
Pop_UnG058567	2.39199e-202	0.381165	0.837	0.549	9.13884e-198	1	---
Pop_UnG069786	2.24116e-155	0.410449	0.867	0.636	8.56258e-151	1	---
Pop_UnG069788	1.46346e-200	0.331259	0.651	0.34	5.59129e-196	1	---
Pop_UnG069985	2.68409e-109	0.550191	0.814	0.671	1.02548e-104	1	HSP21
Pop_A01G010333	7.86214e-36	0.346724	0.491	0.387	3.00381e-31	2	---
Pop_A01G024386	9.9828e-45	0.295109	0.367	0.25	3.81403e-40	2	UGT74E2
Pop_A01G024396	1.72595e-55	0.340128	0.681	0.555	6.59415e-51	2	PPC3
Pop_A01G032087	1.60493e-97	0.379111	0.777	0.647	6.13181e-93	2	RbcX2
Pop_A01G032346	7.40371e-42	0.329829	0.501	0.39	2.82866e-37	2	PEN3
Pop_A01G054823	8.12689e-37	0.282192	0.465	0.366	3.10496e-32	2	UPM1
Pop_A01G059865	3.28165e-46	0.380645	0.557	0.441	1.25379e-41	2	BIP2
Pop_A01G067178	4.22853e-36	0.265793	0.485	0.386	1.61555e-31	2	---
Pop_A01G067285	6.15865e-27	0.25915	0.398	0.309	2.35298e-22	2	ELI3-1
Pop_A01G074938	9.52571e-56	0.375609	0.578	0.455	3.63939e-51	2	RD26
Pop_A01G074958	3.64539e-31	0.361076	0.337	0.242	1.39276e-26	2	---
Pop_A01G074959	2.54999e-41	0.304782	0.824	0.746	9.7425e-37	2	---
Pop_A01G080079	6.81611e-42	0.270963	0.827	0.746	2.60416e-37	2	PDR12
Pop_A02G005471	1.05459e-47	0.254638	0.711	0.595	4.02916e-43	2	---
Pop_A02G012338	2.57712e-54	0.321739	0.524	0.394	9.84615e-50	2	MTM1
Pop_A02G023860	8.94129e-128	0.42653	0.834	0.7	3.41611e-123	2	ACO3
Pop_A02G024024	7.03472e-53	0.317377	0.627	0.517	2.68768e-48	2	PTS
Pop_A02G066273	1.73618e-42	0.251149	0.693	0.599	6.63323e-38	2	NDPK1
Pop_A02G088530	2.47937e-41	0.25324	0.888	0.823	9.47267e-37	2	---
Pop_A03G014923	2.5256e-55	0.402113	0.526	0.396	9.6493e-51	2	BIP2
Pop_A03G019942	5.06477e-42	0.368423	0.599	0.489	1.93504e-37	2	PDR12
Pop_A03G049897	2.74092e-43	0.356191	0.481	0.354	1.04719e-38	2	---
Pop_A04G002663	4.00495e-55	0.294118	0.485	0.361	1.53013e-50	2	PAO
Pop_A04G010823	8.25298e-54	0.410513	0.601	0.475	3.15313e-49	2	---
Pop_A04G010841	2.23135e-37	0.405123	0.571	0.477	8.52508e-33	2	SDR1
Pop_A04G029197	2.05411e-44	0.265531	0.597	0.48	7.84794e-40	2	---
Pop_A04G036033	2.55387e-49	0.259115	0.858	0.78	9.75733e-45	2	RGP2
Pop_A04G060320	1.37463e-29	0.260477	0.612	0.527	5.25191e-25	2	---
Pop_A04G070635	1.33008e-24	0.251774	0.388	0.312	5.08169e-20	2	STY46
Pop_A05G001769	2.51515e-45	0.286305	0.654	0.54	9.60938e-41	2	---
Pop_A05G002167	1.87268e-90	0.701636	0.495	0.325	7.15475e-86	2	SULTR3;1
Pop_A05G073219	9.55041e-42	0.287686	0.465	0.36	3.64883e-37	2	ACO1
Pop_A05G073400	1.03815e-38	0.341189	0.485	0.384	3.96634e-34	2	PARLL1
Pop_A06G053581	7.96426e-45	0.282789	0.661	0.557	3.04283e-40	2	---
Pop_A06G061577	2.45831e-37	0.259329	0.624	0.529	9.39221e-33	2	---
Pop_A06G061817	5.50041e-67	0.343079	0.889	0.812	2.10149e-62	2	IAGLU
Pop_A06G062399	1.47416e-29	0.282668	0.444	0.339	5.63219e-25	2	---
Pop_A06G063029	1.7226e-168	0.385803	0.983	0.916	6.58137e-164	2	HA5
Pop_A06G063071	1.85604e-22	0.298775	0.461	0.38	7.0912e-18	2	---
Pop_A06G085752	3.44143e-21	0.255938	0.502	0.435	1.31483e-16	2	---
Pop_A06G085833	1.90755e-50	0.478351	0.32	0.203	7.28798e-46	2	---
Pop_A07G006508	2.23351e-44	0.301952	0.5	0.388	8.53336e-40	2	SR1
Pop_A07G006667	2.81584e-52	0.287919	0.599	0.492	1.07582e-47	2	LOS1
Pop_A07G006678	5.42746e-25	0.267688	0.455	0.382	2.07362e-20	2	LOS1
Pop_A07G070552	5.09572e-123	0.562181	0.836	0.707	1.94687e-118	2	KTI1
Pop_A07G070554	9.44652e-110	0.481153	0.59	0.39	3.60914e-105	2	KTI1
Pop_A08G006847	5.71414e-30	0.261825	0.549	0.464	2.18315e-25	2	---
Pop_A08G063403	5.07845e-51	0.398672	0.464	0.336	1.94027e-46	2	PROT1
Pop_A08G063434	1.18151e-29	0.278403	0.432	0.341	4.51406e-25	2	---
Pop_A08G063593	6.41163e-54	0.360882	0.425	0.3	2.44963e-49	2	cICDH
Pop_A08G063813	1.48202e-42	0.26815	0.597	0.476	5.66219e-38	2	MYB108
Pop_A08G063870	2.19882e-23	0.3444	0.304	0.225	8.40082e-19	2	BZIP53
Pop_A09G026590	7.21548e-31	0.270118	0.618	0.532	2.75675e-26	2	---
Pop_A09G026636	7.82119e-30	0.274641	0.427	0.338	2.98816e-25	2	PABP8
Pop_A09G026746	3.39367e-89	0.383744	0.823	0.68	1.29659e-84	2	---
Pop_A09G028893	1.04604e-50	0.434237	0.678	0.566	3.9965e-46	2	ELI3-1
Pop_A09G028895	9.6944e-29	0.303631	0.565	0.481	3.70384e-24	2	ELI3-1
Pop_A09G028956	5.54458e-52	0.277471	0.771	0.672	2.11836e-47	2	---
Pop_A09G077415	4.21337e-77	0.271467	0.905	0.827	1.60976e-72	2	GH3.1
Pop_A10G047116	7.4459e-48	0.302193	0.646	0.534	2.84478e-43	2	---
Pop_A10G047213	2.61562e-25	0.25602	0.477	0.401	9.99325e-21	2	RPL23AB
Pop_A10G047332	1.48362e-35	0.367697	0.321	0.219	5.66832e-31	2	GSTU7
Pop_A10G069262	1.14092e-33	0.257679	0.458	0.357	4.35901e-29	2	MYB108
Pop_A10G069278	2.90801e-53	0.316535	0.68	0.559	1.11104e-48	2	LPP3
Pop_A10G069563	3.38544e-32	0.260232	0.419	0.325	1.29344e-27	2	---
Pop_A11G020288	1.09544e-21	0.269195	0.281	0.209	4.18525e-17	2	---
Pop_A11G020297	2.60776e-42	0.307908	0.826	0.752	9.96321e-38	2	---
Pop_A11G021730	1.33827e-26	0.268797	0.506	0.419	5.11298e-22	2	GSTU19
Pop_A11G026207	1.63053e-69	0.360802	0.711	0.61	6.22962e-65	2	---
Pop_A11G056580	1.22749e-47	0.322945	0.743	0.634	4.68976e-43	2	ERF9
Pop_A12G008017	2.23804e-52	0.285804	0.34	0.219	8.55065e-48	2	SK21
Pop_A12G067942	8.59462e-44	0.456749	0.362	0.245	3.28366e-39	2	---
Pop_A12G068169	1.76051e-65	0.312602	0.711	0.598	6.7262e-61	2	SAG15
Pop_A12G068178	4.09991e-29	0.280124	0.481	0.389	1.56641e-24	2	CNX1
Pop_A12G074025	6.16267e-61	0.460757	0.486	0.332	2.35451e-56	2	CHIA
Pop_A13G009878	3.49374e-77	0.348094	0.646	0.509	1.33482e-72	2	ZIGA4
Pop_A13G011468	5.71219e-41	0.329042	0.415	0.302	2.1824e-36	2	---
Pop_A13G082738	6.95695e-60	0.407299	0.687	0.568	2.65797e-55	2	OPR2
Pop_A13G082739	6.01794e-42	0.385256	0.451	0.337	2.29921e-37	2	OPR2
Pop_A14G000314	4.19616e-89	0.46211	0.495	0.325	1.60318e-84	2	AT5PTASE11
Pop_A14G029819	1.96612e-86	0.406136	0.607	0.452	7.51174e-82	2	ATAPT1
Pop_A14G044642	1.81458e-45	0.262127	0.449	0.331	6.9328e-41	2	LGT1
Pop_A14G044789	8.36109e-39	0.320063	0.593	0.487	3.19444e-34	2	---
Pop_A14G045290	1.97692e-22	0.270196	0.359	0.277	7.55302e-18	2	---
Pop_A14G045374	1.47517e-23	0.2811	0.358	0.28	5.63602e-19	2	PDIL2-2
Pop_A14G045388	5.75795e-117	0.410472	0.776	0.672	2.19988e-112	2	FDH
Pop_A15G084368	5.36165e-25	0.256479	0.339	0.257	2.04847e-20	2	CNX1
Pop_A16G017505	1.53822e-143	0.461905	0.852	0.707	5.87691e-139	2	GSTL3
Pop_A16G028795	4.04002e-25	0.417288	0.367	0.28	1.54353e-20	2	ChlAKR
Pop_A16G090055	1.33438e-41	0.265327	0.659	0.569	5.09814e-37	2	---
Pop_A17G008302	3.43213e-23	0.265519	0.287	0.214	1.31128e-18	2	CRK3
Pop_A17G027695	1.15417e-43	0.513712	0.286	0.178	4.40964e-39	2	---
Pop_A17G034481	2.04797e-77	0.385899	0.587	0.453	7.82447e-73	2	cICDH
Pop_A18G083085	4.71632e-36	0.279938	0.456	0.362	1.80192e-31	2	NUDX19
Pop_A19G028529	3.1726e-91	0.552261	0.558	0.379	1.21212e-86	2	---
Pop_G01G002282	2.82157e-52	0.281448	0.555	0.433	1.07801e-47	2	---
Pop_G01G002851	4.81072e-19	0.279719	0.372	0.297	1.83798e-14	2	NUDT12
Pop_G01G002870	1.94918e-70	0.472458	0.606	0.475	7.44702e-66	2	BIP2
Pop_G01G005788	1.10537e-28	0.254475	0.267	0.186	4.22316e-24	2	SnRK3.17
Pop_G01G011414	7.49366e-71	0.397556	0.649	0.479	2.86303e-66	2	ELI3-1
Pop_G01G013394	3.52389e-24	0.416394	0.433	0.352	1.34634e-19	2	---
Pop_G01G016542	4.2603e-30	0.300802	0.523	0.435	1.62769e-25	2	PEN3
Pop_G01G058761	1.47608e-52	0.34042	0.589	0.481	5.63953e-48	2	---
Pop_G01G081184	1.56285e-26	0.278364	0.42	0.332	5.97101e-22	2	UGT74E2
Pop_G02G016002	5.25387e-167	0.50127	0.854	0.703	2.00729e-162	2	ACO3
Pop_G02G016031	2.64624e-31	0.278286	0.407	0.32	1.01102e-26	2	LYSM RLK1
Pop_G02G024223	5.41834e-24	0.252048	0.437	0.359	2.07013e-19	2	---
Pop_G02G030910	1.36969e-18	0.348959	0.316	0.248	5.23304e-14	2	SDR1
Pop_G02G030996	2.7729e-22	0.250487	0.477	0.394	1.05941e-17	2	UGT72B1
Pop_G02G065789	2.52459e-29	0.264891	0.561	0.48	9.64545e-25	2	---
Pop_G02G065819	1.09555e-65	0.355192	0.432	0.279	4.18564e-61	2	SULTR1;3
Pop_G03G011257	2.00581e-28	0.339276	0.321	0.23	7.66338e-24	2	GLIP1
Pop_G03G013731	5.3738e-23	0.307566	0.352	0.278	2.05311e-18	2	BIP2
Pop_G03G055609	2.36605e-13	0.262045	0.332	0.275	9.03975e-09	2	MGL
Pop_G03G055730	3.10044e-76	0.301588	0.773	0.651	1.18456e-71	2	GR1
Pop_G03G055833	1.1698e-33	0.267263	0.362	0.266	4.46933e-29	2	DPL1
Pop_G03G076282	9.48102e-89	0.691988	0.469	0.294	3.62232e-84	2	---
Pop_G03G076433	2.37133e-30	0.27022	0.318	0.231	9.05991e-26	2	---
Pop_G04G023336	5.92463e-74	0.361488	0.61	0.451	2.26357e-69	2	RIN4
Pop_G04G023421	1.02227e-43	0.320441	0.373	0.261	3.90567e-39	2	NEV
Pop_G04G028141	1.20691e-158	0.672416	0.709	0.501	4.61111e-154	2	---
Pop_G05G008137	4.58494e-62	0.350694	0.421	0.279	1.75172e-57	2	SULTR1;3
Pop_G05G017754	2.81601e-46	0.286827	0.667	0.558	1.07588e-41	2	---
Pop_G05G018000	1.46616e-135	0.361093	0.964	0.892	5.60159e-131	2	---
Pop_G05G032881	3.84204e-50	0.330235	0.486	0.367	1.46789e-45	2	RTS3
Pop_G06G003185	8.44604e-26	0.268994	0.446	0.353	3.22689e-21	2	---
Pop_G06G003236	1.47241e-34	0.2621	0.657	0.56	5.6255e-30	2	RPS5B
Pop_G06G003275	9.37693e-21	0.325461	0.275	0.202	3.58255e-16	2	ChiC
Pop_G06G003577	1.1357e-30	0.271744	0.486	0.401	4.33906e-26	2	RTE1
Pop_G06G014284	1.58838e-45	0.397921	0.389	0.27	6.06858e-41	2	---
Pop_G06G014366	3.50161e-15	0.285203	0.398	0.341	1.33783e-10	2	UGT73B4
Pop_G06G034872	2.26166e-36	0.303002	0.311	0.206	8.64089e-32	2	---
Pop_G06G051402	2.8165e-106	0.542267	0.73	0.571	1.07607e-101	2	---
Pop_G06G051519	3.03304e-87	0.386955	0.683	0.524	1.1588e-82	2	---
Pop_G06G051996	2.66892e-31	0.329908	0.497	0.406	1.01969e-26	2	PDR11
Pop_G06G053839	3.35101e-63	0.318261	0.593	0.46	1.28029e-58	2	VDAC4
Pop_G06G076105	1.08792e-54	0.260264	0.952	0.913	4.1565e-50	2	IAGLU
Pop_G06G089741	7.27838e-34	0.294302	0.612	0.512	2.78078e-29	2	GSTU8
Pop_G07G061257	7.97412e-165	0.596188	0.918	0.804	3.04659e-160	2	KTI1
Pop_G07G062438	7.24872e-87	0.253421	0.968	0.914	2.76944e-82	2	PMT6
Pop_G07G062448	3.99456e-56	0.284766	0.679	0.579	1.52616e-51	2	U1SNRNP
Pop_G07G085608	7.7522e-36	0.274258	0.487	0.395	2.96181e-31	2	LOS1
Pop_G08G057878	5.99446e-40	0.376763	0.51	0.396	2.29024e-35	2	PROT1
Pop_G08G057913	5.333e-25	0.283726	0.402	0.32	2.03752e-20	2	---
Pop_G08G082410	3.8345e-56	0.472156	0.504	0.369	1.46501e-51	2	GAPC1
Pop_G09G011629	2.07801e-36	0.272596	0.522	0.398	7.93926e-32	2	HMGR1
Pop_G09G030308	1.9661e-58	0.431499	0.405	0.256	7.51169e-54	2	---
Pop_G09G030310	3.33214e-76	0.525361	0.489	0.32	1.27308e-71	2	---
Pop_G09G030311	4.60476e-138	0.604523	0.794	0.605	1.7593e-133	2	---
Pop_G09G031724	5.79858e-72	0.403324	0.923	0.853	2.2154e-67	2	ELI3-1
Pop_G09G031749	1.56442e-46	0.271075	0.699	0.594	5.97701e-42	2	---
Pop_G09G051063	2.21739e-290	0.688898	0.954	0.804	8.47178e-286	2	---
Pop_G09G051071	5.91598e-34	0.277533	0.337	0.241	2.26026e-29	2	---
Pop_G09G051110	1.15782e-40	0.250494	0.808	0.74	4.42356e-36	2	---
Pop_G09G077276	1.94567e-93	0.28139	0.977	0.95	7.43362e-89	2	---
Pop_G09G077326	3.03159e-27	0.265194	0.438	0.358	1.15825e-22	2	PABP8
Pop_G09G077624	3.89494e-22	0.276129	0.251	0.181	1.4881e-17	2	bZIP44
Pop_G09G077645	6.79836e-62	0.409003	0.531	0.391	2.59738e-57	2	---
Pop_G10G001557	3.29904e-52	0.411184	0.475	0.344	1.26043e-47	2	B-ARR
Pop_G10G027191	9.72208e-36	0.257382	0.471	0.371	3.71442e-31	2	---
Pop_G10G047829	7.21107e-29	0.251485	0.472	0.376	2.75506e-24	2	PP2C5
Pop_G10G047997	1.62179e-114	0.509158	0.674	0.483	6.19622e-110	2	MYB108
Pop_G10G060693	5.79036e-29	0.252294	0.369	0.274	2.21226e-24	2	---
Pop_G10G064629	4.61539e-148	0.440556	0.95	0.883	1.76336e-143	2	GSTU7
Pop_G10G064640	1.49649e-40	0.27425	0.54	0.439	5.71747e-36	2	---
Pop_G11G077715	3.78153e-66	0.284501	0.978	0.95	1.44477e-61	2	GSTU19
Pop_G12G008961	6.86654e-83	0.374266	0.588	0.44	2.62343e-78	2	PMSR1
Pop_G12G050892	4.69613e-49	0.386297	0.443	0.309	1.7942e-44	2	CHIA
Pop_G13G024434	1.36534e-47	0.315728	0.872	0.809	5.21641e-43	2	OPR2
Pop_G13G024435	2.37429e-31	0.271211	0.471	0.373	9.07121e-27	2	OPR2
Pop_G13G024436	5.68262e-46	0.456996	0.684	0.6	2.1711e-41	2	OPR2
Pop_G13G034724	6.24637e-97	0.454222	0.739	0.577	2.38649e-92	2	FAB1D
Pop_G13G071078	2.25598e-34	0.291886	0.502	0.39	8.61921e-30	2	---
Pop_G13G071082	4.40796e-47	0.372569	0.667	0.536	1.68411e-42	2	ERF1
Pop_G13G072524	4.68747e-28	0.255047	0.312	0.226	1.79089e-23	2	---
Pop_G14G023592	2.89922e-21	0.261623	0.292	0.219	1.10767e-16	2	RID3
Pop_G14G045095	1.69104e-40	0.314857	0.391	0.28	6.46079e-36	2	HAK5
Pop_G14G078033	9.42932e-22	0.269988	0.581	0.51	3.60257e-17	2	UGT72B1
Pop_G14G089067	1.36052e-29	0.276103	0.702	0.615	5.198e-25	2	MAPKKK18
Pop_G14G089139	3.2414e-127	0.452487	0.837	0.746	1.23841e-122	2	FDH
Pop_G15G033940	8.49379e-44	0.316262	0.483	0.372	3.24514e-39	2	---
Pop_G15G034983	9.72559e-30	0.288882	0.339	0.251	3.71576e-25	2	CNX1
Pop_G15G048862	1.45479e-82	0.362469	0.601	0.458	5.55818e-78	2	PPT
Pop_G15G048876	6.97417e-26	0.259003	0.389	0.305	2.66455e-21	2	ATB BETA
Pop_G15G074498	1.20003e-52	0.283905	0.711	0.61	4.58485e-48	2	GEK1
Pop_G16G016176	1.40501e-35	0.250236	0.684	0.593	5.36797e-31	2	---
Pop_G16G025175	6.13364e-56	0.375583	0.627	0.504	2.34342e-51	2	GSTU7
Pop_G16G060750	2.23026e-119	0.460419	0.768	0.611	8.52092e-115	2	GSTL3
Pop_G16G060757	2.05654e-63	0.347487	0.688	0.563	7.85723e-59	2	---
Pop_G16G060816	1.17371e-43	0.256396	0.614	0.522	4.48429e-39	2	CSY2
Pop_G17G033132	7.44649e-52	0.353273	0.509	0.381	2.845e-47	2	WRKY75
Pop_G17G086994	1.28411e-169	0.42187	0.905	0.803	4.90607e-165	2	---
Pop_G18G019077	6.95016e-30	0.275597	0.446	0.361	2.65538e-25	2	SnRK3.23
Pop_G19G000500	3.764e-58	0.345501	0.68	0.543	1.43807e-53	2	---
Pop_A01G002204	1.53724e-266	0.286018	0.667	0.272	5.87318e-262	3	---
Pop_A01G003944	1.79312e-224	0.32353	0.783	0.394	6.8508e-220	3	---
Pop_A01G003964	5.64979e-227	0.510418	0.613	0.268	2.15856e-222	3	ERF-1
Pop_A01G004230	3.95521e-273	0.250535	0.641	0.252	1.51113e-268	3	RSU2
Pop_A01G004262	0	0.433656	0.556	0.169	0	3	---
Pop_A01G010177	0	0.707042	0.714	0.305	0	3	---
Pop_A01G010235	0	0.298555	0.562	0.182	0	3	EDA9
Pop_A01G010250	3.22865e-270	0.287825	0.369	0.099	1.23354e-265	3	GRP2
Pop_A01G010299	0	0.857458	0.599	0.194	0	3	---
Pop_A01G010333	1.53621e-263	0.562945	0.733	0.351	5.86925e-259	3	---
Pop_A01G010369	0	0.402233	0.57	0.18	0	3	SNL1
Pop_A01G025038	1.33477e-299	0.305551	0.692	0.278	5.09962e-295	3	PGY2
Pop_A01G025041	2.24985e-287	0.397613	0.895	0.477	8.59579e-283	3	PGY2
Pop_A01G025071	0	0.641763	0.463	0.097	0	3	OMT1
Pop_A01G029542	0	0.368671	0.318	0.052	0	3	---
Pop_A01G029631	2.61348e-260	0.368254	0.292	0.065	9.98505e-256	3	AAC2
Pop_A01G032262	8.05191e-226	0.364854	0.934	0.604	3.07631e-221	3	---
Pop_A01G054489	2.8767e-77	0.292245	0.728	0.485	1.09907e-72	3	---
Pop_A01G054504	9.44625e-185	0.499876	0.278	0.079	3.60903e-180	3	BGLU17
Pop_A01G054584	0	0.265714	0.332	0.059	0	3	PUB24
Pop_A01G056916	8.82016e-161	0.264392	0.536	0.247	3.36983e-156	3	---
Pop_A01G058645	0	0.413347	0.756	0.296	0	3	G6PD6
Pop_A01G059075	1.08039e-197	0.318552	0.429	0.155	4.12773e-193	3	WRKY28
Pop_A01G059666	7.56431e-263	0.292369	0.521	0.186	2.89002e-258	3	RPS15A
Pop_A01G059865	1.28512e-132	0.290523	0.726	0.416	4.90991e-128	3	BIP2
Pop_A01G067176	4.42004e-235	0.296803	0.722	0.338	1.68872e-230	3	---
Pop_A01G067226	1.39011e-205	0.330172	0.837	0.466	5.31107e-201	3	---
Pop_A01G067285	0	0.520254	0.721	0.26	0	3	ELI3-1
Pop_A01G074938	9.51688e-289	0.476455	0.834	0.417	3.63602e-284	3	RD26
Pop_A01G074958	0	0.600323	0.581	0.205	0	3	---
Pop_A01G074959	1.03603e-210	0.539742	0.941	0.729	3.95824e-206	3	---
Pop_A01G079870	1.06575e-236	0.325018	0.406	0.128	4.0718e-232	3	SIB1
Pop_A02G005392	4.2227e-284	0.425143	0.712	0.316	1.61332e-279	3	---
Pop_A02G005462	1.68671e-288	0.464431	0.864	0.464	6.44425e-284	3	RPL3A
Pop_A02G012131	4.05801e-231	0.26598	0.725	0.337	1.5504e-226	3	---
Pop_A02G012213	4.89854e-249	0.394132	0.691	0.297	1.87154e-244	3	BAP2
Pop_A02G012294	0	0.758951	0.507	0.148	0	3	AT-ACS1
Pop_A02G012349	1.74214e-199	0.263589	0.693	0.325	6.65603e-195	3	UGT72B1
Pop_A02G012454	5.4328e-205	0.389014	0.972	0.779	2.07566e-200	3	---
Pop_A02G023945	5.62294e-71	0.303629	0.742	0.497	2.1483e-66	3	---
Pop_A02G023960	1.76155e-138	0.328929	0.868	0.563	6.73016e-134	3	---
Pop_A02G032994	4.53001e-257	0.391241	0.888	0.504	1.73074e-252	3	---
Pop_A02G033057	1.40782e-242	0.298071	0.746	0.349	5.37874e-238	3	---
Pop_A02G065549	6.07588e-174	0.40162	0.355	0.123	2.32135e-169	3	RSH
Pop_A02G065575	1.78808e-102	0.374441	0.703	0.431	6.83155e-98	3	ATADH1
Pop_A02G065700	5.64476e-300	0.346637	0.701	0.288	2.15664e-295	3	---
Pop_A02G066145	1.04663e-223	0.257989	0.514	0.19	3.99875e-219	3	ATAMY1
Pop_A02G066273	0	0.570035	0.933	0.562	0	3	NDPK1
Pop_A02G088530	1.04512e-133	0.464738	0.97	0.81	3.99299e-129	3	---
Pop_A03G014923	3.97225e-193	0.33039	0.731	0.366	1.51764e-188	3	BIP2
Pop_A03G019731	7.69431e-150	0.325583	0.619	0.308	2.93969e-145	3	---
Pop_A03G020080	1.66169e-160	0.474905	0.558	0.265	6.34865e-156	3	SIB1
Pop_A03G020145	6.08608e-232	0.252569	0.69	0.308	2.32525e-227	3	---
Pop_A03G020165	3.36173e-284	0.420597	0.859	0.451	1.28438e-279	3	RS27A
Pop_A03G034672	0	0.55637	0.323	0.062	0	3	---
Pop_A03G049897	0	1.09738	0.762	0.312	0	3	---
Pop_A03G049909	1.69502e-240	0.361771	0.372	0.11	6.47599e-236	3	GLYI7
Pop_A03G050013	5.54082e-190	0.300951	0.743	0.37	2.11693e-185	3	ATL3
Pop_A03G050326	0	0.396309	0.501	0.152	0	3	RSU2
Pop_A04G010841	4.01966e-159	0.42951	0.763	0.448	1.53575e-154	3	SDR1
Pop_A04G019448	9.30571e-172	0.278193	0.329	0.109	3.55534e-167	3	---
Pop_A04G026029	1.05247e-231	0.410872	0.952	0.656	4.02106e-227	3	---
Pop_A04G029197	0	0.548453	0.882	0.437	0	3	---
Pop_A04G029306	1.1736e-252	0.254449	0.624	0.251	4.48384e-248	3	---
Pop_A04G029397	7.43665e-296	0.353731	0.532	0.176	2.84125e-291	3	UGT88A1
Pop_A04G036033	2.98678e-162	0.454594	0.974	0.763	1.14113e-157	3	RGP2
Pop_A04G059370	6.31434e-237	0.375775	0.858	0.479	2.41246e-232	3	---
Pop_A04G060320	3.43608e-239	0.440497	0.863	0.489	1.31279e-234	3	---
Pop_A04G060381	2.84541e-220	0.304206	0.765	0.377	1.08712e-215	3	HDT3
Pop_A05G001769	2.59089e-250	0.394889	0.884	0.506	9.89876e-246	3	---
Pop_A05G002142	5.45933e-255	0.379956	0.653	0.283	2.08579e-250	3	---
Pop_A05G002167	8.41404e-286	0.554397	0.695	0.296	3.21467e-281	3	SULTR3;1
Pop_A05G002187	1.63859e-175	0.401721	0.578	0.269	6.26041e-171	3	CML11
Pop_A05G056198	1.30668e-230	0.377035	0.768	0.374	4.9923e-226	3	---
Pop_A05G056290	3.63991e-286	0.450774	0.53	0.185	1.39067e-281	3	RPL3A
Pop_A05G056392	1.54039e-286	0.261205	0.562	0.196	5.8852e-282	3	---
Pop_A05G071816	0	0.314319	0.742	0.307	0	3	---
Pop_A05G073134	0	0.489214	0.807	0.375	0	3	---
Pop_A05G073451	0	0.326784	0.297	0.055	0	3	---
Pop_A06G053446	3.95314e-210	0.316002	0.868	0.499	1.51034e-205	3	---
Pop_A06G053495	1.06112e-303	0.524847	0.626	0.237	4.05411e-299	3	NADP-ME3
Pop_A06G053581	7.43433e-248	0.394679	0.9	0.521	2.84036e-243	3	---
Pop_A06G053680	6.84178e-297	0.324107	0.471	0.139	2.61397e-292	3	---
Pop_A06G053681	4.24987e-273	0.270387	0.589	0.218	1.62371e-268	3	RS27A
Pop_A06G061527	6.48084e-243	0.316083	0.809	0.41	2.47607e-238	3	---
Pop_A06G061577	6.21693e-274	0.407606	0.884	0.489	2.37524e-269	3	---
Pop_A06G061782	2.21703e-137	0.363767	0.739	0.423	8.4704e-133	3	PGIP1
Pop_A06G061817	2.3192e-90	0.297148	0.954	0.803	8.86073e-86	3	IAGLU
Pop_A06G061852	4.77888e-299	0.41266	0.808	0.384	1.82582e-294	3	---
Pop_A06G061957	0	0.577147	0.373	0.084	0	3	HSFB3
Pop_A06G062399	0	0.605142	0.76	0.291	0	3	---
Pop_A06G063071	0	0.829941	0.782	0.331	0	3	---
Pop_A06G064856	0	0.272957	0.524	0.167	0	3	---
Pop_A06G064857	0	0.45353	0.841	0.406	0	3	---
Pop_A06G079261	1.40914e-281	0.383761	0.399	0.111	5.38377e-277	3	ATACO1
Pop_A06G079298	0	0.320521	0.38	0.065	0	3	---
Pop_A06G079406	2.33026e-173	0.250321	0.375	0.132	8.903e-169	3	SUS4
Pop_A06G079410	4.39642e-222	0.253437	0.647	0.274	1.6797e-217	3	---
Pop_A06G085704	6.69414e-295	0.351402	0.747	0.327	2.55757e-290	3	---
Pop_A06G085833	4.06435e-248	0.406532	0.5	0.176	1.55283e-243	3	---
Pop_A06G089502	1.59269e-237	0.325974	0.671	0.286	6.08503e-233	3	---
Pop_A07G006431	1.01794e-272	0.257911	0.678	0.275	3.88913e-268	3	---
Pop_A07G006447	2.67645e-284	0.322333	0.579	0.211	1.02257e-279	3	---
Pop_A07G006678	1.19695e-249	0.302509	0.739	0.339	4.57306e-245	3	LOS1
Pop_A07G006696	0	0.406561	0.447	0.084	0	3	---
Pop_A07G011943	1.07036e-209	0.321483	0.822	0.45	4.0894e-205	3	---
Pop_A07G022498	3.98796e-263	0.306958	0.789	0.368	1.52364e-258	3	---
Pop_A07G022577	4.19285e-108	0.353051	0.917	0.668	1.60192e-103	3	---
Pop_A07G022619	3.6647e-298	0.280876	0.578	0.201	1.40014e-293	3	---
Pop_A07G022674	3.46673e-292	0.279076	0.582	0.207	1.3245e-287	3	---
Pop_A07G022756	0	0.561489	0.805	0.363	0	3	---
Pop_A07G022809	0	0.475918	0.423	0.11	0	3	PLP2
Pop_A07G022810	2.45641e-224	0.365679	0.895	0.54	9.38497e-220	3	PGY1
Pop_A07G070552	0	1.10074	0.95	0.69	0	3	KTI1
Pop_A07G070553	0	0.671137	0.452	0.124	0	3	KTI1
Pop_A07G070554	0	0.913408	0.858	0.351	0	3	KTI1
Pop_A07G085224	1.23849e-160	0.403904	0.733	0.405	4.73178e-156	3	ERF9
Pop_A08G002406	0	0.490063	0.758	0.317	0	3	---
Pop_A08G002435	1.29976e-150	0.251625	0.388	0.15	4.96585e-146	3	PCR2
Pop_A08G006847	7.14305e-233	0.323877	0.819	0.423	2.72907e-228	3	---
Pop_A08G009087	3.85967e-167	0.25228	0.757	0.411	1.47463e-162	3	TCTP
Pop_A08G012002	1.09219e-299	0.33528	0.662	0.259	4.1728e-295	3	---
Pop_A08G045898	2.41477e-250	0.268434	0.73	0.325	9.22589e-246	3	---
Pop_A08G046010	8.30177e-180	0.425106	0.265	0.074	3.17178e-175	3	GSTU7
Pop_A08G046030	5.55132e-194	0.369033	0.643	0.302	2.12094e-189	3	---
Pop_A08G046050	0	0.54975	0.91	0.542	0	3	---
Pop_A08G046075	0	0.384554	0.663	0.243	0	3	---
Pop_A08G063406	1.26607e-277	0.380774	0.815	0.405	4.83714e-273	3	---
Pop_A08G063434	0	0.426784	0.728	0.296	0	3	---
Pop_A08G063440	5.97397e-297	0.302159	0.69	0.277	2.28242e-292	3	---
Pop_A08G063574	4.63205e-246	0.261398	0.702	0.304	1.76972e-241	3	RPL23AB
Pop_A08G063674	1.29307e-242	0.466125	0.318	0.082	4.94029e-238	3	---
Pop_A08G063740	6.20227e-187	0.266437	0.925	0.575	2.36964e-182	3	RPS15A
Pop_A08G063813	4.80331e-260	0.4017	0.86	0.437	1.83515e-255	3	MYB108
Pop_A08G063867	0	0.78488	0.405	0.104	0	3	PADOX-1
Pop_A08G063870	4.01899e-250	0.474163	0.523	0.192	1.5355e-245	3	BZIP53
Pop_A08G063879	2.0548e-261	0.314432	0.773	0.356	7.85057e-257	3	---
Pop_A08G064100	6.18717e-113	0.317761	0.859	0.567	2.36387e-108	3	---
Pop_A09G014459	2.46073e-263	0.451872	0.77	0.379	9.40147e-259	3	---
Pop_A09G026590	1.51436e-179	0.409271	0.838	0.499	5.78575e-175	3	---
Pop_A09G026654	1.18515e-108	0.2506	0.283	0.11	4.52799e-104	3	---
Pop_A09G026663	2.05493e-235	0.324315	0.81	0.415	7.85108e-231	3	---
Pop_A09G026746	5.31313e-269	0.551924	0.962	0.66	2.02993e-264	3	---
Pop_A09G028867	2.68488e-267	0.393796	0.851	0.448	1.02578e-262	3	---
Pop_A09G028893	2.00293e-181	0.563259	0.862	0.539	7.65241e-177	3	ELI3-1
Pop_A09G028895	3.74563e-291	0.564617	0.854	0.437	1.43106e-286	3	ELI3-1
Pop_A09G028938	1.94788e-287	0.29619	0.458	0.138	7.44207e-283	3	---
Pop_A09G028956	2.13205e-215	0.395094	0.94	0.647	8.14569e-211	3	---
Pop_A09G059526	4.13758e-128	0.294342	0.663	0.366	1.5808e-123	3	ZAT12
Pop_A09G076710	1.73068e-231	0.397702	0.973	0.734	6.61223e-227	3	---
Pop_A09G076812	1.55276e-248	0.313169	0.658	0.284	5.93248e-244	3	HDT1
Pop_A09G076846	5.14933e-275	0.366226	0.807	0.39	1.96735e-270	3	---
Pop_A09G076912	0	0.618194	0.404	0.055	0	3	---
Pop_A10G001709	4.38735e-120	0.570914	0.624	0.353	1.67623e-115	3	---
Pop_A10G046587	1.09478e-252	0.384485	0.839	0.445	4.18272e-248	3	---
Pop_A10G046827	7.70458e-251	0.282426	0.731	0.334	2.94361e-246	3	---
Pop_A10G046895	0	0.853481	0.832	0.322	0	3	---
Pop_A10G046900	2.39098e-239	0.268704	0.479	0.168	9.13496e-235	3	---
Pop_A10G046904	1.68989e-220	0.326562	0.783	0.404	6.4564e-216	3	---
Pop_A10G047088	1.16132e-167	0.250095	0.72	0.386	4.43696e-163	3	---
Pop_A10G047116	6.28532e-240	0.371339	0.879	0.499	2.40137e-235	3	---
Pop_A10G047190	7.03804e-255	0.432061	0.894	0.521	2.68895e-250	3	---
Pop_A10G047213	3.37691e-282	0.336589	0.779	0.355	1.29018e-277	3	RPL23AB
Pop_A10G047316	0	0.41676	0.371	0.073	0	3	---
Pop_A10G047318	1.56986e-278	0.327889	0.431	0.126	5.9978e-274	3	ERF1
Pop_A10G047332	3.43826e-145	0.3015	0.456	0.199	1.31362e-140	3	GSTU7
Pop_A10G047345	3.33749e-223	0.321716	0.875	0.485	1.27512e-218	3	---
Pop_A10G047396	2.05449e-274	0.516507	0.886	0.523	7.84938e-270	3	emb2171
Pop_A10G047457	9.13169e-241	0.307714	0.757	0.363	3.48885e-236	3	---
Pop_A10G047613	9.75828e-221	0.272306	0.765	0.377	3.72825e-216	3	---
Pop_A10G048427	3.07781e-177	0.384963	0.76	0.409	1.17591e-172	3	PCR2
Pop_A10G048475	5.70069e-164	0.251064	0.632	0.301	2.17801e-159	3	---
Pop_A10G069175	6.24551e-187	0.339376	0.941	0.649	2.38616e-182	3	---
Pop_A10G069230	5.21507e-195	0.496255	0.813	0.481	1.99247e-190	3	CP1
Pop_A10G069471	1.80615e-210	0.255962	0.655	0.29	6.90056e-206	3	ALIS1
Pop_A11G020297	1.37531e-240	0.630503	0.963	0.731	5.25449e-236	3	---
Pop_A11G021730	4.81444e-198	0.530943	0.715	0.388	1.83941e-193	3	GSTU19
Pop_A11G021732	4.07689e-94	0.287036	0.915	0.67	1.55762e-89	3	GSTU19
Pop_A11G026273	7.76901e-202	0.405306	0.865	0.498	2.96823e-197	3	WRKY6
Pop_A11G056493	1.19874e-291	0.458567	0.51	0.166	4.57992e-287	3	---
Pop_A11G056580	2.63462e-289	0.697714	0.933	0.605	1.00658e-284	3	ERF9
Pop_A11G056600	1.50562e-161	0.441149	0.577	0.284	5.75238e-157	3	roxy19
Pop_A11G056617	9.58882e-214	0.300232	0.787	0.388	3.66351e-209	3	ERF1
Pop_A11G056784	2.45619e-187	0.46958	0.799	0.469	9.38411e-183	3	---
Pop_A11G079052	2.54491e-275	0.286523	0.552	0.198	9.72307e-271	3	PGY2
Pop_A11G091301	3.77962e-276	0.256403	0.642	0.244	1.44404e-271	3	IM1
Pop_A12G007841	5.73331e-264	0.36274	0.717	0.324	2.19047e-259	3	---
Pop_A12G007970	2.29982e-234	0.29918	0.686	0.314	8.7867e-230	3	RPL24A
Pop_A12G019248	8.70146e-293	0.339222	0.701	0.291	3.32448e-288	3	---
Pop_A12G027549	8.19895e-250	0.358025	0.789	0.393	3.13249e-245	3	RPSAb
Pop_A12G067942	0	0.969393	0.716	0.192	0	3	---
Pop_A12G068050	2.68379e-237	0.32899	0.824	0.435	1.02537e-232	3	---
Pop_A12G068216	6.4165e-179	0.269826	0.812	0.449	2.45149e-174	3	---
Pop_A12G073724	2.81511e-294	0.38162	0.73	0.322	1.07554e-289	3	TIM9
Pop_A12G073922	4.14821e-175	0.255153	0.385	0.138	1.58486e-170	3	---
Pop_A12G074015	1.77581e-119	0.25231	0.984	0.776	6.78468e-115	3	UBC10
Pop_A12G074025	0	1.3762	0.803	0.284	0	3	CHIA
Pop_A12G081566	5.0416e-267	0.368385	0.61	0.244	1.92619e-262	3	---
Pop_A13G010056	3.31708e-237	0.256026	0.411	0.129	1.26732e-232	3	ANAC087
Pop_A13G011470	0	0.459455	0.558	0.189	0	3	ERF1
Pop_A13G011472	0	0.712719	0.566	0.198	0	3	---
Pop_A13G032423	6.043e-232	0.287866	0.697	0.321	2.30879e-227	3	---
Pop_A13G054112	2.52028e-278	0.411085	0.844	0.435	9.62897e-274	3	---
Pop_A13G054230	0	0.391974	0.757	0.321	0	3	---
Pop_A13G082570	3.52856e-295	0.366031	0.706	0.298	1.34812e-290	3	---
Pop_A13G082737	4.43448e-123	0.377411	0.948	0.76	1.69424e-118	3	OPR2
Pop_A13G082738	1.381e-141	0.447171	0.836	0.546	5.27623e-137	3	OPR2
Pop_A13G082739	1.38677e-172	0.391475	0.636	0.31	5.2983e-168	3	OPR2
Pop_A14G000374	1.33059e-172	0.288901	0.855	0.475	5.08367e-168	3	AR781
Pop_A14G000395	8.13154e-301	0.363243	0.782	0.353	3.10674e-296	3	---
Pop_A14G000753	3.61095e-232	0.316627	0.799	0.407	1.3796e-227	3	---
Pop_A14G029819	7.4701e-307	0.427486	0.857	0.415	2.85403e-302	3	ATAPT1
Pop_A14G044011	8.60946e-230	0.358846	0.833	0.455	3.28933e-225	3	---
Pop_A14G044789	1.61891e-179	0.490286	0.774	0.46	6.18521e-175	3	---
Pop_A14G044927	2.14409e-120	0.283101	0.958	0.681	8.1917e-116	3	---
Pop_A14G044986	5.42398e-237	0.26413	0.763	0.367	2.07229e-232	3	---
Pop_A14G045015	3.22418e-256	1.28881	0.405	0.13	1.23183e-251	3	---
Pop_A14G045018	0	1.36742	0.511	0.136	0	3	---
Pop_A14G045290	1.52088e-257	0.362863	0.614	0.239	5.81069e-253	3	---
Pop_A14G045330	6.62266e-149	0.333274	0.802	0.476	2.53025e-144	3	MAPKKK18
Pop_A14G045374	2.45369e-187	0.256926	0.57	0.247	9.37455e-183	3	PDIL2-2
Pop_A14G045422	3.21987e-255	0.31491	0.794	0.373	1.23018e-250	3	---
Pop_A14G045471	2.62907e-248	0.353569	0.751	0.352	1.00446e-243	3	---
Pop_A14G090673	7.83442e-272	0.368167	0.796	0.398	2.99322e-267	3	---
Pop_A14G090720	2.12445e-185	0.303399	0.615	0.28	8.11666e-181	3	PAR2
Pop_A15G014721	0	0.2905	0.472	0.135	0	3	SKIP7
Pop_A15G017107	9.56701e-90	0.347929	0.673	0.429	3.65517e-85	3	---
Pop_A15G017234	2.21714e-234	0.251985	0.742	0.349	8.47082e-230	3	GR-RBP3
Pop_A15G049065	0	0.39205	0.73	0.29	0	3	---
Pop_A15G064263	3.36295e-254	0.332089	0.81	0.411	1.28485e-249	3	RACK1A_AT
Pop_A15G064334	2.10445e-244	0.418808	0.586	0.235	8.04027e-240	3	---
Pop_A15G076628	1.07666e-306	0.282842	0.55	0.185	4.1135e-302	3	---
Pop_A15G076632	0	0.441548	0.307	0.053	0	3	PGL3
Pop_A15G084343	2.11917e-269	0.251634	0.672	0.271	8.09651e-265	3	UBQ6
Pop_A16G017451	3.92007e-273	0.505023	0.904	0.558	1.4977e-268	3	---
Pop_A16G017453	1.17615e-286	0.438317	0.86	0.456	4.49361e-282	3	---
Pop_A16G017505	2.90266e-162	0.377839	0.952	0.693	1.10899e-157	3	GSTL3
Pop_A16G028795	1.79434e-186	0.691223	0.547	0.253	6.85545e-182	3	ChlAKR
Pop_A16G035307	3.49933e-213	0.294553	0.568	0.237	1.33696e-208	3	GSTU7
Pop_A16G035358	6.34923e-281	0.821055	0.425	0.128	2.42579e-276	3	GCN4
Pop_A16G055247	9.30906e-292	0.46112	0.859	0.45	3.55662e-287	3	RPS5B
Pop_A16G055265	1.18071e-278	0.366591	0.652	0.263	4.51102e-274	3	---
Pop_A16G055360	1.99962e-91	0.613888	0.591	0.373	7.63973e-87	3	---
Pop_A16G090055	1.13504e-140	0.254157	0.885	0.535	4.33653e-136	3	---
Pop_A16G090079	3.87451e-229	0.30512	0.771	0.385	1.48029e-224	3	---
Pop_A17G011762	2.33381e-185	0.251602	0.887	0.505	8.91654e-181	3	---
Pop_A17G020499	1.94803e-245	0.253041	0.677	0.291	7.44263e-241	3	---
Pop_A17G027638	3.25381e-119	0.282274	0.982	0.831	1.24315e-114	3	roxy19
Pop_A17G027695	0	0.598566	0.524	0.142	0	3	---
Pop_A17G034521	1.14266e-248	0.252897	0.624	0.253	4.36563e-244	3	---
Pop_A17G081353	1.19989e-269	0.289436	0.685	0.288	4.5843e-265	3	---
Pop_A17G081364	0	0.406492	0.549	0.171	0	3	WIN1
Pop_A17G081459	0	0.473753	0.341	0.068	0	3	RHS19
Pop_A18G012740	1.84513e-276	0.334959	0.782	0.367	7.0495e-272	3	---
Pop_A18G018961	1.14009e-196	0.405783	0.875	0.515	4.35583e-192	3	ATAGP22
Pop_A18G083156	0	0.614742	0.62	0.217	0	3	SUS4
Pop_A19G028512	5.42729e-308	0.384917	0.681	0.271	2.07355e-303	3	ROC2
Pop_A19G028529	0	0.705027	0.761	0.349	0	3	---
Pop_A19G028636	0	0.989726	0.513	0.136	0	3	KTI1
Pop_A19G028637	0	0.758275	0.802	0.358	0	3	KTI1
Pop_A19G052925	3.05266e-270	0.424065	0.9	0.522	1.1663e-265	3	---
Pop_A19G053127	2.25982e-256	0.27626	0.689	0.295	8.63387e-252	3	---
Pop_A19G055146	0	0.708775	0.459	0.135	0	3	---
Pop_A19G060505	2.80719e-246	0.467943	0.827	0.438	1.07251e-241	3	---
Pop_G01G002258	7.03168e-204	0.316589	0.692	0.335	2.68652e-199	3	---
Pop_G01G002870	2.18342e-156	0.312786	0.788	0.448	8.34197e-152	3	BIP2
Pop_G01G004732	4.80387e-190	0.444069	0.483	0.197	1.83537e-185	3	ERF-1
Pop_G01G010776	9.40061e-144	0.481064	0.312	0.112	3.5916e-139	3	OSM34
Pop_G01G011286	1.80359e-243	0.287425	0.28	0.063	6.89081e-239	3	CYP87A2
Pop_G01G011414	0	0.947212	0.895	0.443	0	3	ELI3-1
Pop_G01G011423	3.91594e-208	0.260961	0.87	0.479	1.49613e-203	3	---
Pop_G01G013348	0	0.513857	0.428	0.108	0	3	---
Pop_G01G013394	6.27702e-294	0.831322	0.681	0.315	2.3982e-289	3	---
Pop_G01G016601	1.58641e-241	0.382767	0.88	0.505	6.06102e-237	3	---
Pop_G01G020706	2.20939e-145	0.357511	0.834	0.511	8.44118e-141	3	PDIL1-6
Pop_G01G024757	0	0.368873	0.563	0.179	0	3	---
Pop_G01G058736	3.77197e-253	0.344989	0.787	0.38	1.44112e-248	3	---
Pop_G01G067430	0	1.04772	0.856	0.48	0	3	---
Pop_G01G067502	0	0.263963	0.479	0.136	0	3	EDA9
Pop_G01G067537	4.12775e-254	0.262734	0.511	0.178	1.57705e-249	3	---
Pop_G01G067569	1.4496e-215	0.314607	0.469	0.169	5.53836e-211	3	---
Pop_G01G075447	1.92824e-272	0.408773	0.458	0.145	7.36704e-268	3	SIB1
Pop_G01G075559	1.91508e-290	0.706542	0.447	0.138	7.31677e-286	3	AAC2
Pop_G01G075777	1.79507e-249	0.365718	0.539	0.198	6.85823e-245	3	AT4CL2
Pop_G01G081964	1.40456e-281	0.348038	0.808	0.383	5.36625e-277	3	PGY2
Pop_G01G089202	1.4665e-239	0.359368	0.851	0.474	5.60291e-235	3	RSU2
Pop_G01G090300	3.48962e-241	0.299631	0.48	0.168	1.33324e-236	3	VNI2
Pop_G01G090303	6.92354e-235	0.323312	0.809	0.416	2.64521e-230	3	---
Pop_G02G005193	0	0.379671	0.69	0.254	0	3	---
Pop_G02G005291	1.80618e-140	0.305104	0.441	0.193	6.90071e-136	3	PIN6
Pop_G02G005596	2.81594e-81	0.352835	0.703	0.466	1.07586e-76	3	ZAT10
Pop_G02G012724	0	0.405582	0.641	0.225	0	3	NDPK1
Pop_G02G015777	2.91114e-240	0.355188	0.878	0.493	1.11223e-235	3	---
Pop_G02G015839	4.72568e-227	0.255628	0.456	0.16	1.80549e-222	3	---
Pop_G02G015860	4.20223e-184	0.341465	0.889	0.534	1.6055e-179	3	VAMP726
Pop_G02G015968	4.29198e-178	0.340632	0.757	0.403	1.63979e-173	3	---
Pop_G02G023751	6.08318e-267	0.499554	0.903	0.545	2.32414e-262	3	---
Pop_G02G024191	0	0.257465	0.384	0.087	0	3	PGP11
Pop_G02G030910	1.20376e-117	0.403864	0.463	0.226	4.59908e-113	3	SDR1
Pop_G02G030926	0	0.506172	0.667	0.261	0	3	BAP2
Pop_G02G030996	3.62579e-253	0.494745	0.744	0.354	1.38527e-248	3	UGT72B1
Pop_G02G031027	3.98326e-276	0.939472	0.615	0.27	1.52185e-271	3	AT-ACS1
Pop_G02G065030	9.96752e-209	0.381004	0.479	0.185	3.80819e-204	3	---
Pop_G02G065208	9.86451e-230	0.270452	0.682	0.306	3.76883e-225	3	---
Pop_G02G065502	1.15719e-296	0.254859	0.547	0.185	4.42116e-292	3	RPL3A
Pop_G02G065810	3.95548e-139	0.266852	0.652	0.341	1.51123e-134	3	---
Pop_G02G066010	0	0.925615	0.604	0.174	0	3	---
Pop_G03G010458	4.18495e-242	0.271243	0.612	0.249	1.5989e-237	3	---
Pop_G03G010551	1.47096e-244	0.258995	0.751	0.351	5.61994e-240	3	---
Pop_G03G011257	1.50037e-276	0.549201	0.548	0.196	5.73231e-272	3	GLIP1
Pop_G03G013423	8.36043e-252	0.455214	0.963	0.683	3.19419e-247	3	---
Pop_G03G013594	8.24423e-133	0.30492	0.534	0.261	3.14979e-128	3	---
Pop_G03G013625	8.6114e-233	0.283677	0.4	0.125	3.29007e-228	3	---
Pop_G03G013731	1.46608e-177	0.263487	0.56	0.247	5.60131e-173	3	BIP2
Pop_G03G013913	1.7771e-276	0.355245	0.774	0.358	6.78959e-272	3	RS27A
Pop_G03G013943	5.98356e-304	0.517544	0.58	0.206	2.28608e-299	3	---
Pop_G03G021320	2.16038e-223	0.45041	0.854	0.504	8.25393e-219	3	---
Pop_G03G055521	5.59752e-142	0.304024	0.36	0.14	2.13859e-137	3	SIB1
Pop_G03G055609	1.24403e-135	0.327867	0.518	0.247	4.75295e-131	3	MGL
Pop_G03G055849	3.39636e-194	0.322881	0.521	0.209	1.29761e-189	3	---
Pop_G03G076282	0	1.0883	0.657	0.267	0	3	---
Pop_G03G076307	6.50198e-186	0.36782	0.997	0.899	2.48415e-181	3	---
Pop_G03G076433	0	0.302347	0.572	0.193	0	3	---
Pop_G04G011058	7.84441e-174	0.433697	0.947	0.649	2.99703e-169	3	RGP2
Pop_G04G011067	3.64958e-185	0.36067	0.968	0.744	1.39436e-180	3	---
Pop_G04G028141	6.57e-125	0.296746	0.803	0.488	2.51013e-120	3	---
Pop_G04G028275	5.16856e-191	0.282085	0.782	0.423	1.9747e-186	3	---
Pop_G04G028297	0	0.68823	0.936	0.589	0	3	GRP8
Pop_G04G060044	3.53414e-157	0.357571	0.392	0.155	1.35025e-152	3	FD3
Pop_G04G060104	1.24172e-242	0.287943	0.695	0.309	4.74413e-238	3	---
Pop_G04G060120	2.6303e-241	0.35824	0.879	0.491	1.00493e-236	3	PGY1
Pop_G04G060361	3.88423e-158	0.383327	0.306	0.102	1.48401e-153	3	PR3
Pop_G04G060367	8.14539e-307	0.420254	0.589	0.205	3.11203e-302	3	---
Pop_G04G066487	1.3008e-266	0.287786	0.696	0.298	4.96984e-262	3	---
Pop_G04G066744	4.81426e-263	0.33855	0.827	0.414	1.83934e-258	3	---
Pop_G04G079217	3.58941e-178	0.269751	0.522	0.219	1.37137e-173	3	RMA1
Pop_G05G008132	6.85844e-193	0.276906	0.401	0.139	2.62034e-188	3	---
Pop_G05G008393	1.62551e-291	0.343857	0.422	0.12	6.21041e-287	3	RPL3A
Pop_G05G008575	2.57556e-251	0.375298	0.658	0.289	9.84019e-247	3	---
Pop_G05G017754	2.45937e-247	0.40809	0.893	0.524	9.39627e-243	3	---
Pop_G05G017912	6.17375e-289	0.368603	0.755	0.33	2.35874e-284	3	MES1
Pop_G05G069974	3.29919e-220	0.359125	0.886	0.52	1.26049e-215	3	---
Pop_G05G072351	6.18526e-267	0.259388	0.569	0.208	2.36314e-262	3	---
Pop_G05G074062	4.15459e-230	0.32321	0.869	0.485	1.5873e-225	3	---
Pop_G05G090872	3.0004e-284	0.296731	0.598	0.22	1.14633e-279	3	IND1
Pop_G05G091022	0	0.349129	0.414	0.086	0	3	CYP96A10
Pop_G05G091045	8.341e-303	0.337557	0.455	0.131	3.18676e-298	3	---
Pop_G06G003185	0	0.833261	0.785	0.302	0	3	---
Pop_G06G003236	6.59231e-286	0.482583	0.898	0.524	2.51866e-281	3	RPS5B
Pop_G06G003275	0	0.785577	0.582	0.156	0	3	ChiC
Pop_G06G003284	5.41496e-278	0.291391	0.66	0.263	2.06884e-273	3	---
Pop_G06G003369	3.22721e-301	0.382531	0.646	0.255	1.23299e-296	3	---
Pop_G06G003502	5.16336e-284	0.268539	0.623	0.237	1.97271e-279	3	PEX10
Pop_G06G003644	1.83325e-245	0.40977	0.427	0.136	7.0041e-241	3	NADP-ME3
Pop_G06G003719	9.85259e-227	0.282634	0.761	0.369	3.76428e-222	3	---
Pop_G06G003736	4.02506e-292	0.434771	0.819	0.4	1.53782e-287	3	RS27A
Pop_G06G003766	3.57869e-271	0.33941	0.692	0.301	1.36727e-266	3	---
Pop_G06G034885	5.24116e-244	0.269202	0.705	0.302	2.00244e-239	3	---
Pop_G06G034895	0	0.333913	0.453	0.111	0	3	---
Pop_G06G034927	0	0.262223	0.572	0.193	0	3	FPS1
Pop_G06G051369	7.42812e-253	0.409012	0.862	0.482	2.83799e-248	3	---
Pop_G06G051670	8.93808e-176	0.267547	0.603	0.274	3.41488e-171	3	---
Pop_G06G051743	0	0.553647	0.829	0.397	0	3	---
Pop_G06G051821	4.41284e-246	0.330453	0.279	0.063	1.68597e-241	3	BEN1
Pop_G06G053839	2.62872e-276	0.360395	0.853	0.421	1.00433e-271	3	VDAC4
Pop_G06G053943	1.50982e-282	0.278093	0.385	0.102	5.76841e-278	3	---
Pop_G06G053960	0	0.399421	0.665	0.233	0	3	---
Pop_G06G076048	2.15571e-276	0.294244	0.737	0.321	8.23612e-272	3	---
Pop_G06G076105	1.10929e-207	0.417696	0.993	0.908	4.23815e-203	3	IAGLU
Pop_G06G082797	0	0.786559	0.787	0.285	0	3	---
Pop_G06G082833	1.72858e-242	0.253431	0.319	0.081	6.60421e-238	3	ATACO1
Pop_G06G089702	1.69731e-187	0.250107	0.367	0.122	6.48475e-183	3	---
Pop_G06G089727	0	0.281858	0.399	0.097	0	3	---
Pop_G06G089741	1.42984e-291	0.744624	0.855	0.475	5.46283e-287	3	GSTU8
Pop_G07G031815	2.75245e-257	0.344209	0.701	0.307	1.0516e-252	3	---
Pop_G07G061257	0	1.19687	0.976	0.796	0	3	KTI1
Pop_G07G061266	0	0.32825	0.632	0.208	0	3	---
Pop_G07G061874	2.69798e-248	0.279934	0.717	0.324	1.03079e-243	3	---
Pop_G07G085341	1.5561e-246	0.379794	0.82	0.415	5.94523e-242	3	---
Pop_G08G007451	6.59428e-257	0.398371	0.841	0.446	2.51941e-252	3	RPS28
Pop_G08G022077	2.35854e-245	0.260502	0.702	0.308	9.01105e-241	3	---
Pop_G08G046253	2.40377e-273	0.30048	0.71	0.304	9.18386e-269	3	---
Pop_G08G046262	1.41431e-159	0.280204	0.828	0.477	5.4035e-155	3	---
Pop_G08G046278	9.27326e-265	0.28966	0.743	0.322	3.54294e-260	3	---
Pop_G08G057636	6.89998e-288	0.392915	0.846	0.426	2.63621e-283	3	---
Pop_G08G057641	0	0.554954	0.767	0.301	0	3	---
Pop_G08G057707	1.13261e-242	0.337309	0.865	0.466	4.32727e-238	3	---
Pop_G08G057736	1.02702e-137	0.434087	0.463	0.213	3.92383e-133	3	---
Pop_G08G057913	0	0.41454	0.72	0.271	0	3	---
Pop_G08G058146	8.96411e-181	0.364202	0.969	0.719	3.42483e-176	3	ELF5A-1
Pop_G08G058337	2.43598e-230	0.309654	0.611	0.251	9.30689e-226	3	---
Pop_G08G058504	4.73181e-173	0.353658	0.879	0.535	1.80784e-168	3	ALIS1
Pop_G08G058604	1.89682e-123	0.263141	0.595	0.304	7.247e-119	3	---
Pop_G08G063536	1.64159e-191	0.282295	0.783	0.419	6.27185e-187	3	---
Pop_G08G082372	0	0.454706	0.769	0.338	0	3	---
Pop_G08G082410	1.51644e-219	0.555059	0.695	0.341	5.7937e-215	3	GAPC1
Pop_G08G083395	0	1.08034	0.453	0.1	0	3	MLP423
Pop_G08G087170	3.75771e-178	0.43343	0.743	0.401	1.43567e-173	3	---
Pop_G09G011629	6.01523e-201	0.379546	0.736	0.366	2.29818e-196	3	HMGR1
Pop_G09G014090	4.43754e-304	0.396069	0.614	0.229	1.69541e-299	3	---
Pop_G09G015062	8.81434e-208	0.361489	0.997	0.916	3.36761e-203	3	---
Pop_G09G015093	3.82557e-223	0.282978	0.65	0.291	1.4616e-218	3	---
Pop_G09G027839	9.57031e-250	0.354973	0.923	0.547	3.65643e-245	3	---
Pop_G09G030308	0	1.59332	0.685	0.214	0	3	---
Pop_G09G030310	0	1.49581	0.763	0.279	0	3	---
Pop_G09G030311	0	1.47169	0.916	0.588	0	3	---
Pop_G09G031724	2.34176e-267	0.717204	0.979	0.845	8.94691e-263	3	ELI3-1
Pop_G09G031732	7.57254e-281	0.337857	0.754	0.335	2.89317e-276	3	---
Pop_G09G031749	6.50506e-238	0.378838	0.922	0.56	2.48532e-233	3	---
Pop_G09G051063	0	1.24811	0.992	0.8	0	3	---
Pop_G09G051110	2.45233e-170	0.337321	0.962	0.717	9.36939e-166	3	---
Pop_G09G051146	8.34048e-282	0.325286	0.608	0.231	3.18657e-277	3	HDT1
Pop_G09G077636	7.41963e-214	0.324376	0.852	0.477	2.83474e-209	3	---
Pop_G09G077643	0	0.655439	0.498	0.128	0	3	---
Pop_G09G077645	9.67967e-227	0.457442	0.736	0.36	3.69822e-222	3	---
Pop_G10G001557	2.46709e-264	0.355972	0.72	0.307	9.42578e-260	3	B-ARR
Pop_G10G006068	1.028e-271	0.396872	0.779	0.377	3.92759e-267	3	RPS28
Pop_G10G006118	7.81716e-216	0.352083	0.901	0.547	2.98662e-211	3	---
Pop_G10G006239	1.73317e-253	0.30245	0.741	0.338	6.62173e-249	3	---
Pop_G10G007068	2.84412e-220	0.293886	0.845	0.454	1.08662e-215	3	---
Pop_G10G007223	2.76933e-217	0.284407	0.748	0.371	1.05805e-212	3	---
Pop_G10G007329	8.93619e-161	0.262891	0.251	0.072	3.41416e-156	3	EXO70H2
Pop_G10G007330	4.1255e-195	0.269351	0.818	0.445	1.57619e-190	3	---
Pop_G10G007355	9.43927e-264	0.300243	0.743	0.335	3.60637e-259	3	RPL23AB
Pop_G10G007703	2.71718e-225	0.536218	0.529	0.209	1.03813e-220	3	---
Pop_G10G022940	1.25571e-207	0.295277	0.431	0.155	4.79758e-203	3	DI21
Pop_G10G027070	5.35447e-183	0.282631	0.852	0.492	2.04573e-178	3	---
Pop_G10G047829	1.01832e-196	0.293281	0.71	0.34	3.89058e-192	3	PP2C5
Pop_G10G047997	5.66794e-176	0.297068	0.837	0.46	2.16549e-171	3	MYB108
Pop_G10G048025	2.71778e-111	0.346231	0.637	0.368	1.03836e-106	3	CP1
Pop_G10G048276	1.86262e-250	0.418647	0.763	0.357	7.11632e-246	3	PDE337
Pop_G10G048361	3.36284e-153	0.434952	0.567	0.274	1.28481e-148	3	---
Pop_G10G060671	2.03856e-198	0.372797	0.814	0.438	7.78852e-194	3	ERF1
Pop_G10G060693	0	0.575257	0.682	0.227	0	3	---
Pop_G10G064629	2.19231e-92	0.254236	0.984	0.879	8.37593e-88	3	GSTU7
Pop_G10G064640	1.31849e-215	0.262049	0.799	0.4	5.03743e-211	3	---
Pop_G11G070292	8.36661e-225	0.311682	0.351	0.103	3.19655e-220	3	---
Pop_G11G077685	1.4185e-168	0.505262	0.269	0.079	5.41953e-164	3	UPI
Pop_G11G077715	6.91814e-239	0.512772	0.996	0.947	2.64314e-234	3	GSTU19
Pop_G11G078940	5.53638e-224	0.279213	0.579	0.233	2.11523e-219	3	---
Pop_G12G007892	4.61817e-205	0.270087	0.834	0.448	1.76442e-200	3	UBQ6
Pop_G12G008961	0	0.405415	0.852	0.401	0	3	PMSR1
Pop_G12G009067	0	0.504108	0.502	0.124	0	3	---
Pop_G12G050695	3.26668e-254	0.320786	0.765	0.364	1.24807e-249	3	---
Pop_G12G050892	0	1.02168	0.758	0.261	0	3	CHIA
Pop_G12G084661	4.89741e-251	0.333616	0.798	0.395	1.8711e-246	3	RPS13A
Pop_G12G084742	5.52867e-232	0.364553	0.701	0.329	2.11228e-227	3	---
Pop_G13G024434	9.15771e-128	0.424583	0.962	0.796	3.49879e-123	3	OPR2
Pop_G13G024435	3.11679e-272	0.328984	0.76	0.329	1.1908e-267	3	OPR2
Pop_G13G024436	5.01595e-173	0.613892	0.854	0.574	1.91639e-168	3	OPR2
Pop_G13G024606	0	0.374159	0.718	0.298	0	3	---
Pop_G13G070858	3.1673e-272	0.363103	0.854	0.442	1.2101e-267	3	---
Pop_G13G070871	0	0.336794	0.716	0.289	0	3	---
Pop_G13G071039	0	0.998169	0.852	0.517	0	3	PR4
Pop_G13G071078	5.30395e-189	0.328615	0.714	0.358	2.02643e-184	3	---
Pop_G13G071082	0	0.766131	0.884	0.504	0	3	ERF1
Pop_G14G000566	3.14237e-236	0.256657	0.526	0.191	1.20057e-231	3	---
Pop_G14G023592	0	0.559784	0.582	0.175	0	3	RID3
Pop_G14G044444	2.30428e-186	0.289127	0.79	0.434	8.80374e-182	3	---
Pop_G14G044497	2.40297e-201	0.317987	0.873	0.517	9.18078e-197	3	---
Pop_G14G044515	4.06742e-237	0.263018	0.622	0.257	1.554e-232	3	---
Pop_G14G045213	2.18419e-278	0.343005	0.784	0.365	8.3449e-274	3	RPL18
Pop_G14G051170	8.63648e-178	0.296708	0.38	0.136	3.29965e-173	3	---
Pop_G14G083021	4.1239e-229	0.294048	0.776	0.389	1.57558e-224	3	---
Pop_G14G089067	4.89797e-127	0.352702	0.879	0.589	1.87132e-122	3	MAPKKK18
Pop_G14G089139	1.2876e-119	0.281305	0.959	0.728	4.91942e-115	3	FDH
Pop_G15G015203	1.11132e-123	0.25673	0.843	0.514	4.24593e-119	3	CB5-E
Pop_G15G015208	0	0.894944	0.527	0.112	0	3	PGL3
Pop_G15G017318	0	0.326509	0.562	0.175	0	3	---
Pop_G15G033940	3.39004e-236	0.329169	0.721	0.336	1.2952e-231	3	---
Pop_G15G034955	4.60015e-233	0.329217	0.798	0.411	1.75753e-228	3	---
Pop_G15G034974	8.22604e-273	0.364451	0.677	0.282	3.14284e-268	3	---
Pop_G15G074285	8.80461e-238	0.360257	0.858	0.473	3.36389e-233	3	---
Pop_G15G074349	3.50991e-194	0.345543	0.424	0.156	1.341e-189	3	---
Pop_G15G074421	1.33535e-113	0.29894	0.962	0.715	5.10185e-109	3	GSTU4
Pop_G15G084428	3.79381e-183	0.296655	0.896	0.556	1.44946e-178	3	RPS13A
Pop_G15G084430	1.16926e-182	0.304608	0.948	0.664	4.46729e-178	3	---
Pop_G16G016176	1.44229e-248	0.413032	0.908	0.559	5.51042e-244	3	---
Pop_G16G016382	3.54208e-300	0.45052	0.774	0.361	1.35329e-295	3	---
Pop_G16G025175	2.63754e-268	0.652758	0.843	0.472	1.0077e-263	3	GSTU7
Pop_G16G025214	2.19931e-195	0.318846	0.919	0.574	8.4027e-191	3	---
Pop_G16G060750	3.9833e-171	0.358323	0.92	0.589	1.52186e-166	3	GSTL3
Pop_G16G060757	1.55059e-245	0.38779	0.908	0.53	5.9242e-241	3	---
Pop_G16G060775	1.2946e-258	0.427754	0.917	0.566	4.94616e-254	3	---
Pop_G16G060897	1.24856e-279	0.449591	0.881	0.498	4.77026e-275	3	---
Pop_G16G068485	3.00202e-176	0.304444	0.779	0.414	1.14695e-171	3	---
Pop_G16G068701	1.37365e-240	0.252005	0.52	0.192	5.24818e-236	3	---
Pop_G16G068717	2.64117e-298	0.672599	0.434	0.128	1.00909e-293	3	ChlAKR
Pop_G17G015428	0	0.386741	0.545	0.162	0	3	WIN1
Pop_G17G021045	2.1107e-212	0.301407	0.889	0.499	8.06413e-208	3	---
Pop_G17G021063	4.75231e-228	0.803013	0.574	0.255	1.81567e-223	3	---
Pop_G17G025711	1.6313e-285	0.34173	0.664	0.272	6.23254e-281	3	---
Pop_G17G031496	1.47602e-116	0.271869	0.961	0.745	5.63927e-112	3	roxy19
Pop_G17G033132	0	0.537339	0.796	0.337	0	3	WRKY75
Pop_G17G033145	0	0.457558	0.495	0.133	0	3	RHS19
Pop_G17G033216	1.88094e-234	0.287829	0.534	0.204	7.1863e-230	3	GRP2
Pop_G17G067068	6.27496e-268	0.32026	0.775	0.36	2.39741e-263	3	---
Pop_G17G086994	5.52836e-117	0.260403	0.986	0.792	2.11217e-112	3	---
Pop_G18G011087	1.03796e-282	0.265944	0.566	0.202	3.96564e-278	3	---
Pop_G18G083239	2.33695e-195	0.420885	0.87	0.513	8.92856e-191	3	ATAGP22
Pop_G18G086115	2.7035e-266	0.386668	0.933	0.555	1.0329e-261	3	---
Pop_G18G086280	2.11101e-287	0.331805	0.693	0.287	8.06532e-283	3	---
Pop_G19G000500	9.63936e-268	0.59181	0.895	0.511	3.68281e-263	3	---
Pop_G19G021900	1.96048e-294	0.440579	0.91	0.515	7.49022e-290	3	---
Pop_G19G028437	1.93878e-304	0.812209	0.532	0.189	7.40729e-300	3	KTI1
Pop_G19G028438	0	0.829916	0.365	0.078	0	3	KTI1
Pop_G19G028457	2.0106e-263	0.946125	0.355	0.098	7.68172e-259	3	KTI1
Pop_UnG026791	1.33054e-231	0.368945	0.415	0.136	5.08345e-227	3	---
Pop_UnG034270	0	0.294915	0.517	0.16	0	3	SKIP7
Pop_UnG069715	1.3077e-293	0.38991	0.701	0.297	4.99618e-289	3	---
Pop_UnG069978	3.78074e-227	0.332014	0.659	0.292	1.44447e-222	3	---
Pop_UnG079499	1.65133e-213	0.396864	0.941	0.653	6.30908e-209	3	---
Pop_UnG092014	1.90293e-201	0.274428	0.492	0.19	7.27032e-197	3	---
Pop_A01G003820	4.45842e-166	0.591714	0.609	0.294	1.70338e-161	4	LOX3
Pop_A01G003875	8.92403e-35	0.284083	0.645	0.502	3.40951e-30	4	ATL3
Pop_A01G003909	2.03141e-80	0.266385	0.505	0.281	7.76119e-76	4	RAN1
Pop_A01G004117	3.47665e-57	0.313095	0.554	0.366	1.32829e-52	4
Pop_A01G004172	8.76054e-89	0.291976	0.255	0.094	3.34705e-84	4	RHD7
Pop_A01G004511	4.85645e-57	0.263065	0.718	0.521	1.85545e-52	4	---
Pop_A01G010177	1.05338e-21	0.42605	0.451	0.35	4.02454e-17	4	---
Pop_A01G017618	2.05949e-48	0.257553	0.663	0.486	7.8685e-44	4	PAT1
Pop_A01G025086	1.5184e-102	0.550328	0.328	0.13	5.80119e-98	4	---
Pop_A01G032110	6.10845e-143	0.647253	0.559	0.284	2.3338e-138	4	CML38
Pop_A01G054489	1.26655e-56	0.370556	0.697	0.499	4.83897e-52	4	---
Pop_A01G054550	9.9476e-256	0.860696	0.614	0.24	3.80058e-251	4	---
Pop_A01G054552	1.76024e-36	0.259748	0.571	0.417	6.72519e-32	4	---
Pop_A01G054553	1.12571e-157	0.79903	0.367	0.127	4.3009e-153	4	NAC061
Pop_A01G057025	1.80813e-41	0.297414	0.635	0.456	6.90815e-37	4	---
Pop_A01G059668	1.00704e-158	0.496582	0.895	0.678	3.84749e-154	4	PHGPX
Pop_A01G059697	7.00135e-51	0.285245	0.255	0.123	2.67494e-46	4	---
Pop_A01G079870	1.03752e-52	0.405624	0.292	0.152	3.96394e-48	4	SIB1
Pop_A01G079899	4.34481e-115	0.38958	0.379	0.16	1.65998e-110	4	PP2-B1
Pop_A01G080019	1.15451e-36	0.282807	0.773	0.621	4.41091e-32	4	Hsp70b
Pop_A01G081120	1.37573e-76	0.399537	0.529	0.311	5.25613e-72	4	RAP2.5
Pop_A02G005511	8.1634e-84	0.250207	0.346	0.158	3.11891e-79	4	CSTF64
Pop_A02G012307	3.10301e-31	0.36956	0.402	0.267	1.18554e-26	4	---
Pop_A02G023804	3.05161e-40	0.356609	0.723	0.574	1.1659e-35	4	---
Pop_A02G023869	1.75143e-58	0.33755	0.418	0.244	6.69151e-54	4	---
Pop_A02G023919	3.95914e-31	0.548358	0.355	0.23	1.51263e-26	4	EFE
Pop_A02G023941	2.33336e-52	0.565701	0.632	0.458	8.91484e-48	4	---
Pop_A02G023945	1.31097e-19	0.320342	0.623	0.52	5.0087e-15	4	---
Pop_A02G023960	8.22434e-35	0.342366	0.745	0.589	3.14219e-30	4	---
Pop_A02G024015	8.08757e-60	0.313861	0.732	0.54	3.08994e-55	4	---
Pop_A02G031349	3.71671e-67	0.39803	0.982	0.957	1.42001e-62	4	GSTF6
Pop_A02G031350	1.60749e-47	0.356585	0.761	0.598	6.14158e-43	4	GSTF6
Pop_A02G032995	9.8914e-77	0.513269	0.626	0.404	3.77911e-72	4	OXI1
Pop_A02G033063	2.8287e-60	0.292176	0.703	0.505	1.08073e-55	4	---
Pop_A02G033068	4.4144e-65	0.265361	0.787	0.599	1.68657e-60	4	IAA11
Pop_A02G033088	6.3092e-92	0.390439	0.503	0.268	2.41049e-87	4	---
Pop_A02G086835	9.30562e-123	0.391055	0.987	0.936	3.5553e-118	4	SAG21
Pop_A02G088653	3.76915e-72	0.369438	0.498	0.288	1.44004e-67	4	---
Pop_A03G014937	1.59041e-72	0.345478	0.701	0.5	6.07631e-68	4	---
Pop_A03G014969	5.30376e-85	0.346308	0.849	0.649	2.02635e-80	4	---
Pop_A03G019731	2.51248e-14	0.25108	0.432	0.341	9.59916e-10	4	---
Pop_A03G019734	9.1914e-62	0.290817	0.823	0.646	3.51167e-57	4	GILP
Pop_A03G019934	8.6386e-155	0.618843	0.61	0.307	3.30046e-150	4	WRKY40
Pop_A03G020080	2.10949e-26	0.285705	0.417	0.292	8.05951e-22	4	SIB1
Pop_A03G020132	2.63123e-39	0.293556	0.575	0.412	1.00529e-34	4	---
Pop_A03G020140	1.02466e-77	0.570138	0.253	0.102	3.91482e-73	4	---
Pop_A03G020148	9.01911e-159	0.562157	0.686	0.37	3.44584e-154	4	RBOHD
Pop_A03G049667	5.8262e-61	0.254526	0.616	0.416	2.22596e-56	4	VPS46.1
Pop_A03G050013	2.18102e-45	0.311558	0.571	0.404	8.3328e-41	4	ATL3
Pop_A03G050117	2.95328e-37	0.260035	0.898	0.783	1.12833e-32	4	BI1
Pop_A03G050264	4.10933e-57	0.269318	0.571	0.372	1.57001e-52	4	---
Pop_A03G050335	6.72047e-186	0.665099	0.58	0.267	2.56762e-181	4	AOX1D
Pop_A03G050440	1.76932e-114	0.440547	0.432	0.195	6.75986e-110	4	VAC-INV
Pop_A04G002563	1.71715e-100	0.337934	0.264	0.095	6.56055e-96	4	---
Pop_A04G002635	1.08242e-176	0.66844	0.454	0.172	4.13549e-172	4	ARF15
Pop_A04G010816	8.83719e-78	0.257201	0.411	0.21	3.37634e-73	4	---
Pop_A04G010847	9.73431e-103	0.418199	0.918	0.756	3.71909e-98	4	---
Pop_A04G018139	9.90967e-20	0.317937	0.508	0.39	3.78609e-15	4	---
Pop_A04G019469	1.11984e-43	0.360115	0.725	0.561	4.27845e-39	4	---
Pop_A04G026314	9.16386e-193	0.868277	0.901	0.733	3.50114e-188	4	AOC3
Pop_A04G029166	8.94566e-54	0.355949	0.749	0.575	3.41778e-49	4	HSP90.1
Pop_A04G029333	1.13574e-97	0.384396	0.86	0.688	4.3392e-93	4	---
Pop_A04G029377	4.26536e-246	0.795618	0.746	0.393	1.62962e-241	4	---
Pop_A04G030656	7.17401e-102	0.356992	0.983	0.931	2.7409e-97	4	---
Pop_A04G060174	2.60314e-117	0.515864	0.759	0.49	9.94554e-113	4	---
Pop_A04G060285	9.84222e-41	0.378618	0.864	0.742	3.76032e-36	4	---
Pop_A04G060296	3.55382e-35	0.274634	0.845	0.712	1.35777e-30	4	---
Pop_A04G070597	1.01159e-88	0.386928	0.767	0.568	3.86489e-84	4	---
Pop_A04G070684	3.4212e-87	0.363761	0.939	0.824	1.30711e-82	4	---
Pop_A05G001777	1.19229e-64	0.465841	0.716	0.538	4.55525e-60	4	CYP94B1
Pop_A05G001912	1.16643e-75	0.542403	0.4	0.21	4.45645e-71	4	CKX5
Pop_A05G001947	3.70355e-86	0.414212	0.655	0.42	1.41498e-81	4	---
Pop_A05G002026	1.24661e-257	0.665186	0.51	0.16	4.76281e-253	4	---
Pop_A05G002187	4.23397e-44	0.610534	0.445	0.297	1.61763e-39	4	CML11
Pop_A05G016843	2.48498e-28	0.267188	0.411	0.292	9.4941e-24	4	SRC2
Pop_A05G016943	1.21041e-63	0.339023	0.436	0.249	4.62449e-59	4	SRC2
Pop_A05G056182	1.63527e-132	0.311891	0.427	0.175	6.24773e-128	4	---
Pop_A05G056304	7.58322e-94	0.477918	0.85	0.683	2.89725e-89	4	---
Pop_A05G057060	5.37738e-77	0.350439	0.769	0.561	2.05448e-72	4	BZIP60
Pop_A05G071620	9.32097e-46	0.256325	0.987	0.959	3.56117e-41	4	ATAF1
Pop_A05G072915	1.781e-48	0.302094	0.605	0.439	6.80447e-44	4	SCE1A
Pop_A05G072933	1.21669e-68	0.287324	0.267	0.116	4.64847e-64	4	MAPKKK19
Pop_A05G073203	4.60492e-217	0.745519	0.584	0.234	1.75936e-212	4	SIMIP
Pop_A06G053337	4.69511e-43	0.287262	0.832	0.684	1.79382e-38	4	HSP17.6II
Pop_A06G053389	3.6485e-67	0.371603	0.522	0.325	1.39394e-62	4	COPT5
Pop_A06G053579	1.022e-105	0.543638	0.742	0.501	3.90464e-101	4	PUB22
Pop_A06G053680	1.2975e-30	0.259447	0.283	0.173	4.95723e-26	4	---
Pop_A06G061445	1.48675e-46	0.270516	0.854	0.696	5.68027e-42	4	MT2A
Pop_A06G061559	0	1.07028	0.693	0.261	0	4	---
Pop_A06G061759	1.2497e-77	0.278812	0.535	0.308	4.77461e-73	4	---
Pop_A06G061842	7.72625e-67	0.298368	0.727	0.521	2.95189e-62	4	---
Pop_A06G061854	1.43522e-69	0.340277	0.517	0.318	5.48339e-65	4	---
Pop_A06G061894	3.86471e-148	0.588824	0.567	0.272	1.47655e-143	4	ATRR4
Pop_A06G062109	8.42314e-134	0.582033	0.962	0.833	3.21814e-129	4	---
Pop_A06G062915	2.25791e-56	0.428355	0.317	0.164	8.62657e-52	4	WRKY18
Pop_A06G062959	6.03755e-43	0.292573	0.669	0.502	2.30671e-38	4	---
Pop_A06G064886	1.16568e-70	0.270855	0.287	0.128	4.4536e-66	4	GAE1
Pop_A06G079378	4.62478e-229	0.71393	0.96	0.794	1.76694e-224	4	TIFY10A
Pop_A06G079383	4.27043e-95	0.314641	0.297	0.118	1.63156e-90	4	---
Pop_A06G079386	4.89068e-107	0.534108	0.417	0.192	1.86854e-102	4	---
Pop_A06G079410	3.85666e-93	0.637754	0.528	0.303	1.47347e-88	4	---
Pop_A06G085686	3.69927e-94	0.337861	0.584	0.352	1.41334e-89	4	---
Pop_A06G089502	1.59198e-29	0.317915	0.446	0.326	6.08231e-25	4	---
Pop_A06G089512	3.56202e-56	0.396127	0.4	0.228	1.3609e-51	4	---
Pop_A06G089616	3.34678e-71	0.402258	0.331	0.158	1.27867e-66	4	CML42
Pop_A07G006439	1.36982e-136	0.681952	0.744	0.463	5.23353e-132	4	---
Pop_A07G006642	2.38942e-43	0.274744	0.616	0.43	9.12901e-39	4	PSAN
Pop_A07G010885	1.37406e-71	0.414502	0.878	0.709	5.24973e-67	4	MAPKKK19
Pop_A07G010912	2.04398e-75	0.285847	0.494	0.287	7.80921e-71	4	WRKY7
Pop_A07G010923	5.33505e-119	0.413986	0.613	0.347	2.03831e-114	4	VFB4
Pop_A07G022577	2.70779e-38	0.410119	0.806	0.691	1.03454e-33	4	---
Pop_A07G022726	1.47101e-69	0.305427	0.388	0.205	5.62014e-65	4	HAT22
Pop_A08G002386	3.79946e-61	0.271245	0.264	0.121	1.45162e-56	4	MLO6
Pop_A08G009192	1.94666e-53	0.260919	0.611	0.419	7.43741e-49	4	TL2
Pop_A08G012032	1.11615e-94	0.309373	0.448	0.228	4.26438e-90	4	Kin2
Pop_A08G045845	3.51803e-58	0.373423	0.483	0.292	1.3441e-53	4	LGT8
Pop_A08G046178	2.30399e-232	1.0044	0.746	0.408	8.80263e-228	4	CML11
Pop_A08G063389	7.94077e-89	0.547971	0.506	0.283	3.03385e-84	4	---
Pop_A08G063395	3.07406e-53	0.431475	0.891	0.794	1.17448e-48	4	---
Pop_A08G063398	6.26451e-40	0.331691	0.891	0.774	2.39342e-35	4	---
Pop_A08G063635	2.07767e-65	0.311421	0.729	0.512	7.93796e-61	4	NTMC2TYPE5.2
Pop_A08G063641	9.82788e-56	0.285022	0.428	0.256	3.75484e-51	4	BPS1
Pop_A08G063841	1.36825e-34	0.435792	0.561	0.418	5.22754e-30	4	CP1
Pop_A08G063986	4.9814e-155	0.742012	0.546	0.262	1.90319e-150	4	AOC3
Pop_A08G064096	4.86565e-43	0.301011	0.663	0.483	1.85897e-38	4	---
Pop_A08G064100	1.60682e-44	0.302819	0.77	0.589	6.13901e-40	4	---
Pop_A08G064105	4.48012e-82	0.41614	0.658	0.429	1.71168e-77	4	RPI2
Pop_A08G064200	6.33314e-41	0.384352	0.585	0.42	2.41964e-36	4	---
Pop_A08G086524	9.58069e-95	0.339767	0.424	0.204	3.6604e-90	4	---
Pop_A09G014478	4.1624e-121	0.387973	0.437	0.193	1.59029e-116	4	---
Pop_A09G026565	5.78232e-69	0.376989	0.584	0.366	2.20919e-64	4	---
Pop_A09G026592	2.1882e-24	0.279161	0.801	0.713	8.36025e-20	4	UGT73B3
Pop_A09G028863	5.29244e-66	0.345645	0.485	0.287	2.02203e-61	4	MPK3
Pop_A09G028885	4.85041e-105	0.437864	0.854	0.645	1.85315e-100	4	SAP5
Pop_A09G028969	2.73679e-31	0.271127	0.384	0.258	1.04562e-26	4	BPS1
Pop_A09G059526	1.21256e-57	0.408411	0.595	0.386	4.6327e-53	4	ZAT12
Pop_A09G059564	6.59891e-52	0.300181	0.531	0.345	2.52118e-47	4	---
Pop_A09G076814	2.84885e-106	0.477178	0.664	0.39	1.08843e-101	4	---
Pop_A09G076962	8.37278e-118	0.311895	0.314	0.114	3.19891e-113	4	Kin3
Pop_A09G077503	7.05442e-28	0.323873	0.784	0.668	2.69521e-23	4	PSK4
Pop_A10G001688	5.96276e-45	0.36678	0.839	0.674	2.27813e-40	4	---
Pop_A10G046826	1.54227e-88	0.491754	0.301	0.125	5.89241e-84	4	---
Pop_A10G047235	4.42771e-84	0.290836	0.318	0.138	1.69165e-79	4	CAM8
Pop_A10G047429	5.86852e-49	0.290662	0.752	0.586	2.24213e-44	4	ATAMT1;1
Pop_A10G047445	2.53181e-56	0.312709	0.264	0.127	9.67303e-52	4	GSTU7
Pop_A10G047638	2.8493e-85	0.289661	0.335	0.15	1.0886e-80	4	CRK3
Pop_A10G047661	1.86116e-102	0.652525	0.434	0.211	7.11074e-98	4	---
Pop_A10G048427	7.40606e-31	0.390756	0.577	0.443	2.82956e-26	4	PCR2
Pop_A10G048615	1.60002e-74	0.376428	0.856	0.7	6.11304e-70	4	STP13
Pop_A10G048629	7.04112e-53	0.266224	0.508	0.318	2.69013e-48	4	HSP70T-2
Pop_A10G048656	8.86291e-86	0.404238	0.282	0.116	3.38616e-81	4	---
Pop_A10G069017	1.51195e-64	0.329781	0.739	0.531	5.77656e-60	4	---
Pop_A10G069049	1.55474e-41	0.31979	0.629	0.468	5.94005e-37	4	TEM1
Pop_A10G069069	1.52468e-56	0.589552	0.254	0.121	5.82518e-52	4	IDA
Pop_A10G069240	1.35538e-61	0.346175	0.577	0.379	5.17838e-57	4	WRKY48
Pop_A10G069277	8.68025e-45	0.26252	0.758	0.578	3.31638e-40	4	---
Pop_A10G069323	9.97753e-92	0.281844	0.337	0.147	3.81202e-87	4	---
Pop_A10G069380	7.24966e-75	0.4008	0.736	0.552	2.76981e-70	4	ATG8I
Pop_A10G069485	1.25202e-26	0.261315	0.583	0.44	4.78348e-22	4	HSP20-like
Pop_A10G069629	1.13531e-123	0.446135	0.405	0.171	4.33756e-119	4	FAD8
Pop_A11G021610	2.37501e-67	0.370895	0.594	0.388	9.07395e-63	4	CYP72A15
Pop_A11G021613	1.10738e-77	0.339173	0.769	0.579	4.23087e-73	4	ZAC
Pop_A11G021723	4.21691e-114	0.353359	0.301	0.111	1.61111e-109	4	---
Pop_A11G021732	3.92394e-46	0.29375	0.846	0.689	1.49918e-41	4	GSTU19
Pop_A11G032686	0	1.15899	0.694	0.292	0	4	---
Pop_A11G056435	3.64674e-131	0.469398	0.671	0.391	1.39328e-126	4	---
Pop_A11G056456	1.17815e-221	0.483646	0.328	0.08	4.50123e-217	4	---
Pop_A11G056600	1.59799e-28	0.314383	0.446	0.311	6.10529e-24	4	roxy19
Pop_A11G056828	6.75536e-64	0.366529	0.513	0.327	2.58095e-59	4	B120
Pop_A11G091414	9.41679e-33	0.296309	0.346	0.216	3.59778e-28	4	TIFY5A
Pop_A12G007810	3.13913e-106	0.436206	0.465	0.229	1.19934e-101	4	BAG7
Pop_A12G019399	9.20836e-35	0.277349	0.377	0.242	3.51815e-30	4	ATH6
Pop_A12G019442	3.62545e-98	0.354792	0.763	0.539	1.38514e-93	4	---
Pop_A12G027547	3.01193e-82	0.329484	0.77	0.576	1.15074e-77	4	RHA1
Pop_A12G027575	3.82097e-46	0.277392	0.761	0.629	1.45984e-41	4	SUVH5
Pop_A12G068026	3.59295e-165	0.555139	0.752	0.469	1.37272e-160	4	---
Pop_A12G073750	2.83039e-99	0.56961	0.866	0.727	1.08138e-94	4	ANNAT5
Pop_A12G073771	1.96182e-41	0.368142	0.594	0.43	7.49532e-37	4	---
Pop_A12G073773	2.8632e-59	0.306298	0.422	0.235	1.09391e-54	4	NUDT4
Pop_A12G073807	2.50564e-90	0.348524	0.733	0.496	9.57304e-86	4	C2
Pop_A12G073814	1.61193e-43	0.250324	0.493	0.324	6.15855e-39	4	---
Pop_A12G073881	1.72629e-48	0.431656	0.806	0.658	6.59548e-44	4	LBD41
Pop_A12G073974	1.36567e-228	0.491905	0.316	0.074	5.21766e-224	4	HSR3
Pop_A12G081573	6.58582e-52	0.310498	0.894	0.749	2.51618e-47	4	---
Pop_A12G081583	4.59969e-39	0.611713	0.497	0.354	1.75736e-34	4	HSP21
Pop_A12G081591	4.95919e-53	0.549658	0.723	0.564	1.89471e-48	4	---
Pop_A13G009909	1.138e-132	0.522631	0.655	0.376	4.34783e-128	4	---
Pop_A13G031274	2.7087e-68	0.338907	0.798	0.608	1.03489e-63	4	DGK5
Pop_A13G032448	2.80169e-129	0.517335	0.627	0.335	1.07041e-124	4	---
Pop_A13G032451	2.14854e-69	0.386887	0.793	0.603	8.2087e-65	4	---
Pop_A13G032520	2.05106e-80	0.430525	0.879	0.752	7.83628e-76	4	EP3
Pop_A13G054092	1.72516e-64	0.270184	0.69	0.485	6.59114e-60	4	---
Pop_A13G054123	4.44377e-84	0.403529	0.584	0.361	1.69779e-79	4	SRC2
Pop_A13G054253	5.42722e-123	0.423452	0.517	0.254	2.07353e-118	4	---
Pop_A13G054446	1.28926e-47	0.440366	0.796	0.642	4.92576e-43	4	---
Pop_A13G082715	1.45098e-58	0.418264	0.345	0.185	5.5436e-54	4	---
Pop_A13G082717	1.28783e-47	0.270692	0.299	0.161	4.92028e-43	4	---
Pop_A14G000067	2.77381e-33	0.257657	0.723	0.576	1.05976e-28	4	---
Pop_A14G000313	1.48876e-135	0.471321	0.735	0.45	5.68796e-131	4	DA1
Pop_A14G000324	1.01822e-271	1.03355	0.74	0.356	3.89022e-267	4	DDE2
Pop_A14G044024	9.24575e-61	0.479598	0.497	0.311	3.53243e-56	4	GolS1
Pop_A14G044519	4.82321e-15	0.267305	0.54	0.433	1.84275e-10	4	PAP29
Pop_A14G044819	5.82149e-38	0.311449	0.419	0.276	2.22416e-33	4	WRKY22
Pop_A14G044909	6.86206e-144	0.47714	0.671	0.368	2.62172e-139	4	UBDK GAMMA 4
Pop_A14G044984	4.20598e-87	0.44711	0.752	0.536	1.60694e-82	4	---
Pop_A14G045341	2.38595e-68	0.321049	0.861	0.698	9.11575e-64	4	---
Pop_A15G017107	2.13615e-16	0.386098	0.551	0.452	8.16136e-12	4	---
Pop_A15G017147	3.40444e-85	0.550845	0.422	0.223	1.3007e-80	4	---
Pop_A15G017162	4.17249e-55	0.286619	0.918	0.782	1.59414e-50	4	---
Pop_A15G017163	1.09406e-79	0.41616	0.895	0.741	4.17996e-75	4	SRO5
Pop_A15G064472	3.17661e-93	0.264661	0.404	0.191	1.21365e-88	4	---
Pop_A15G076635	1.34353e-09	0.345085	0.644	0.579	5.13308e-05	4	CB5-E
Pop_A15G084372	5.33135e-78	0.341487	0.342	0.165	2.0369e-73	4	---
Pop_A16G028750	5.46768e-48	0.251713	0.331	0.185	2.08898e-43	4	---
Pop_A16G030769	1.34875e-79	0.392151	0.808	0.616	5.15304e-75	4	LSR1
Pop_A16G033763	3.71566e-121	0.50114	0.922	0.73	1.41961e-116	4	YLS9
Pop_A16G055209	2.76252e-64	0.292779	0.454	0.272	1.05545e-59	4	---
Pop_A16G055218	1.64257e-42	0.283927	0.724	0.557	6.27561e-38	4	PUB22
Pop_A16G089935	1.85536e-154	0.469378	0.302	0.092	7.08857e-150	4	---
Pop_A16G090165	1.72807e-58	0.29252	0.495	0.313	6.60228e-54	4	CLC2
Pop_A17G021133	5.2715e-76	0.292355	0.722	0.502	2.01403e-71	4	---
Pop_A17G021189	1.17189e-23	0.325494	0.355	0.243	4.47731e-19	4	---
Pop_A17G034425	6.53426e-173	0.60088	0.677	0.352	2.49648e-168	4	---
Pop_A17G052605	6.23418e-77	0.283814	0.491	0.282	2.38183e-72	4	---
Pop_A17G052691	6.3962e-45	0.443422	0.597	0.434	2.44373e-40	4	TAT7
Pop_A17G052721	4.08669e-56	0.705826	0.566	0.388	1.56136e-51	4	---
Pop_A18G012910	7.04111e-60	0.336119	0.73	0.533	2.69013e-55	4	KCS11
Pop_A18G013026	2.98674e-128	0.555398	0.72	0.444	1.14112e-123	4	---
Pop_A18G013037	9.94586e-129	0.620473	0.791	0.528	3.79992e-124	4	WRKY40
Pop_A18G018752	5.32602e-59	0.331109	0.892	0.773	2.03486e-54	4	---
Pop_A18G018777	6.17062e-99	0.405438	0.83	0.604	2.35755e-94	4	SnRK3.4
Pop_A18G018877	3.85975e-105	0.491028	0.694	0.454	1.47466e-100	4	---
Pop_A18G018961	7.56182e-121	0.553026	0.801	0.539	2.88907e-116	4	ATAGP22
Pop_A18G035963	2.31756e-112	0.363004	0.403	0.174	8.85446e-108	4	WRKY11
Pop_A18G089843	4.11133e-94	0.507644	0.522	0.294	1.57078e-89	4	TIL
Pop_A19G052450	3.74863e-36	0.262862	0.259	0.144	1.4322e-31	4	ASD
Pop_A19G052813	2.3721e-148	0.745236	0.252	0.068	9.06286e-144	4	---
Pop_A19G052865	7.67587e-80	0.322083	0.534	0.316	2.93264e-75	4	---
Pop_A19G055148	2.64064e-27	0.475423	0.561	0.425	1.00888e-22	4	---
Pop_G01G004798	8.70875e-96	0.422916	0.564	0.328	3.32726e-91	4	PUP10
Pop_G01G004886	8.02926e-178	0.628212	0.875	0.599	3.06766e-173	4	LOX3
Pop_G01G005826	5.76174e-44	0.260207	0.713	0.543	2.20133e-39	4	---
Pop_G01G010746	5.34394e-163	0.404872	1	0.986	2.0417e-158	4	PHGPX
Pop_G01G010756	2.67497e-76	0.255713	0.364	0.179	1.022e-71	4	---
Pop_G01G011413	1.29338e-39	0.300305	0.571	0.409	4.94149e-35	4	---
Pop_G01G011421	3.57734e-91	0.367476	0.842	0.645	1.36676e-86	4	SAP5
Pop_G01G020816	1.73096e-93	0.483468	0.522	0.284	6.61329e-89	4	---
Pop_G01G020817	5.02483e-87	0.431493	0.342	0.153	1.91979e-82	4	---
Pop_G01G020827	3.11752e-64	0.298402	0.666	0.454	1.19108e-59	4	EXO70H2
Pop_G01G020930	9.75434e-36	0.300535	0.551	0.398	3.72674e-31	4	---
Pop_G01G024709	1.23379e-135	0.608162	0.422	0.175	4.71382e-131	4	---
Pop_G01G034547	4.53889e-64	0.272901	0.434	0.246	1.73413e-59	4	---
Pop_G01G034609	1.96037e-47	0.25048	0.627	0.447	7.4898e-43	4	PAT1
Pop_G01G067569	1.43188e-96	0.785372	0.393	0.19	5.47063e-92	4	---
Pop_G01G074566	2.69528e-63	0.390786	0.565	0.37	1.02976e-58	4	PP2-B1
Pop_G01G075447	5.76414e-33	0.318448	0.292	0.176	2.20225e-28	4	SIB1
Pop_G01G075659	1.63336e-29	0.262358	0.763	0.629	6.24042e-25	4	Hsp70b
Pop_G01G075768	2.66161e-76	0.391015	0.517	0.296	1.01689e-71	4	WRKY40
Pop_G01G089220	2.44235e-61	0.330173	0.534	0.345	9.33124e-57	4	---
Pop_G01G090379	6.96846e-82	0.453152	0.798	0.596	2.66237e-77	4	CML38
Pop_G02G005270	2.04937e-102	0.401485	0.445	0.217	7.82981e-98	4	PUB29
Pop_G02G015779	2.02317e-80	0.440612	0.518	0.298	7.72973e-76	4	OXI1
Pop_G02G015813	4.95222e-60	0.350234	0.457	0.269	1.89205e-55	4	---
Pop_G02G015851	3.87884e-72	0.361248	0.962	0.869	1.48195e-67	4	---
Pop_G02G023725	3.57973e-116	0.490407	0.319	0.118	1.36767e-111	4	IAA4
Pop_G02G065114	4.32064e-79	0.496815	0.79	0.59	1.65074e-74	4	---
Pop_G02G065144	4.95707e-47	0.291995	0.826	0.664	1.8939e-42	4	TRX1
Pop_G02G065438	4.95438e-128	0.775171	0.711	0.44	1.89287e-123	4	XTR7
Pop_G02G065448	3.6112e-93	0.268767	0.534	0.298	1.37969e-88	4	NAC017
Pop_G02G065905	2.44205e-85	0.312485	0.289	0.119	9.33008e-81	4	---
Pop_G02G065917	3.4433e-134	0.634324	0.652	0.395	1.31555e-129	4	---
Pop_G02G065927	4.22708e-51	0.425338	0.457	0.281	1.615e-46	4	---
Pop_G02G065957	1.87331e-100	0.496431	0.698	0.463	7.15716e-96	4	UCP5
Pop_G02G065980	1.56208e-64	0.252923	0.769	0.566	5.96809e-60	4	---
Pop_G02G080423	5.37062e-137	0.689684	0.794	0.53	2.0519e-132	4	---
Pop_G02G080457	1.9745e-37	0.375418	0.357	0.219	7.54377e-33	4	EFE
Pop_G02G080514	2.84604e-72	0.340482	0.983	0.929	1.08736e-67	4	GSTF6
Pop_G03G013491	2.51905e-53	0.263457	0.545	0.361	9.62429e-49	4	---
Pop_G03G013616	1.63459e-147	0.568549	0.423	0.169	6.24511e-143	4	---
Pop_G03G013649	9.06108e-107	0.400534	0.573	0.305	3.46188e-102	4	TIFY9
Pop_G03G013746	9.27471e-77	0.379149	0.681	0.47	3.54349e-72	4	---
Pop_G03G013778	2.2716e-150	0.493863	0.973	0.88	8.67889e-146	4	---
Pop_G03G013928	8.60946e-154	0.468379	0.425	0.164	3.28933e-149	4	RBOHD
Pop_G03G013944	1.00849e-58	0.349514	0.58	0.387	3.85303e-54	4	---
Pop_G03G055549	7.64178e-35	0.26352	0.4	0.253	2.91962e-30	4	CYSB
Pop_G03G055684	9.25066e-155	0.573941	0.642	0.331	3.53431e-150	4	WRKY40
Pop_G03G055830	9.53372e-27	0.286801	0.656	0.546	3.64245e-22	4	WRKY75
Pop_G03G078151	1.97501e-140	0.593481	0.451	0.197	7.54572e-136	4	AOX1D
Pop_G03G078259	3.88342e-91	0.395524	0.594	0.348	1.4837e-86	4	VAC-INV
Pop_G03G078296	3.94542e-54	0.299135	0.971	0.936	1.50739e-49	4	HSP23.6-MITO
Pop_G04G010703	1.02301e-88	0.328509	0.598	0.365	3.90852e-84	4	---
Pop_G04G011190	2.81712e-82	0.382646	0.316	0.14	1.07631e-77	4	---
Pop_G04G018366	8.34739e-63	0.433977	0.426	0.252	3.1892e-58	4	roxy19
Pop_G04G018493	2.2322e-47	0.318535	0.644	0.454	8.52833e-43	4	ERF9
Pop_G04G023183	2.99076e-60	0.578951	0.6	0.431	1.14265e-55	4	ASD
Pop_G04G023408	2.26684e-28	0.356247	0.549	0.41	8.66069e-24	4	---
Pop_G04G023532	1.21712e-67	0.347525	0.267	0.118	4.65011e-63	4	ASD
Pop_G04G028135	1.29974e-149	0.516515	0.961	0.777	4.96579e-145	4	SPE2
Pop_G04G028162	7.78393e-69	0.296921	0.363	0.184	2.97393e-64	4	---
Pop_G04G028231	1.667e-44	0.254476	0.589	0.403	6.36894e-40	4	GATA5
Pop_G04G060189	2.61203e-81	0.278414	0.397	0.199	9.97952e-77	4	---
Pop_G04G060339	4.62068e-88	0.324659	0.657	0.418	1.76538e-83	4	---
Pop_G04G066488	5.19491e-94	0.47617	0.727	0.489	1.98477e-89	4	HSP90.1
Pop_G04G066709	6.74041e-35	0.354709	0.55	0.408	2.57524e-30	4	---
Pop_G04G066776	1.44705e-173	0.767858	0.924	0.771	5.52861e-169	4	AOC3
Pop_G04G066795	3.28169e-120	0.428087	0.63	0.366	1.2538e-115	4	---
Pop_G04G066821	7.53681e-62	0.303893	0.574	0.361	2.87952e-57	4	SAMDC
Pop_G04G083889	5.43999e-50	0.250906	0.85	0.7	2.0784e-45	4	---
Pop_G05G008304	2.81047e-140	0.413653	0.773	0.492	1.07377e-135	4	---
Pop_G05G008406	1.03668e-92	0.40618	0.624	0.389	3.96075e-88	4	---
Pop_G05G008739	5.47674e-99	0.516709	0.614	0.372	2.09244e-94	4	BZIP60
Pop_G05G032825	3.97412e-99	0.311779	1	0.991	1.51835e-94	4	---
Pop_G05G057262	3.27879e-109	0.35001	1	0.993	1.2527e-104	4	TRX1
Pop_G05G057408	2.57529e-32	0.254863	0.343	0.218	9.83917e-28	4	CYP94B1
Pop_G05G057409	1.91993e-38	0.290503	0.497	0.35	7.33529e-34	4	CYP94B1
Pop_G05G068966	8.63828e-74	0.306932	0.389	0.201	3.30034e-69	4	---
Pop_G05G069854	5.7508e-62	0.422445	0.858	0.704	2.19715e-57	4	---
Pop_G05G069868	3.07058e-97	0.462247	0.77	0.538	1.17315e-92	4	SRC2
Pop_G05G085074	5.41333e-54	0.37126	0.939	0.868	2.06822e-49	4	SCE1A
Pop_G05G085083	5.594e-72	0.473248	0.615	0.401	2.13724e-67	4	MAPKKK19
Pop_G06G003075	3.09735e-75	0.307229	0.858	0.675	1.18337e-70	4	---
Pop_G06G003091	2.32469e-65	0.567171	0.386	0.207	8.88171e-61	4	WRKY18
Pop_G06G003283	3.6986e-114	0.347699	0.552	0.293	1.41309e-109	4	SYR1
Pop_G06G003287	4.47933e-95	0.441574	0.906	0.735	1.71137e-90	4	PUB22
Pop_G06G003304	8.74406e-184	0.71712	0.642	0.315	3.34076e-179	4	YLS9
Pop_G06G003305	8.15588e-154	0.710017	0.784	0.501	3.11604e-149	4	YLS9
Pop_G06G003470	2.24586e-72	0.390562	0.796	0.607	8.58053e-68	4	COPT5
Pop_G06G003520	4.98392e-64	0.305958	0.609	0.406	1.90416e-59	4	HSP17.6II
Pop_G06G014282	4.85924e-77	0.345633	0.491	0.276	1.85652e-72	4	ATRR4
Pop_G06G051224	5.35385e-64	0.420976	0.476	0.291	2.04549e-59	4	---
Pop_G06G051384	1.45997e-189	0.588155	0.801	0.512	5.57797e-185	4	---
Pop_G06G051485	5.06863e-202	0.59755	0.701	0.359	1.93652e-197	4	TIFY10A
Pop_G06G051489	3.40474e-94	0.360974	0.375	0.168	1.30082e-89	4	---
Pop_G06G051492	9.83198e-135	0.750634	0.632	0.352	3.75641e-130	4	---
Pop_G06G051494	1.50946e-47	0.317209	0.598	0.429	5.76705e-43	4	CPN21
Pop_G06G051550	2.08961e-83	0.310771	0.329	0.144	7.98358e-79	4	CML42
Pop_G06G051667	1.18639e-57	0.317928	0.751	0.562	4.53273e-53	4	FAD8
Pop_G06G051755	2.34726e-36	0.582198	0.425	0.283	8.96793e-32	4	---
Pop_G06G075925	2.90401e-75	0.331531	0.488	0.281	1.10951e-70	4	---
Pop_G06G075981	1.1742e-63	0.446523	0.763	0.591	4.48616e-59	4	SIP2
Pop_G06G075993	3.30727e-112	0.421228	0.571	0.314	1.26358e-107	4	WRKY11
Pop_G06G076020	0	1.12009	0.723	0.309	0	4	---
Pop_G06G082078	2.23041e-216	0.733105	0.964	0.797	8.52152e-212	4	---
Pop_G07G032549	3.60479e-24	0.317086	0.561	0.429	1.37725e-19	4	roxy19
Pop_G07G052010	3.65358e-105	0.284008	0.407	0.183	1.39589e-100	4	VFB4
Pop_G07G052197	9.11617e-85	0.432674	0.658	0.427	3.48292e-80	4	MAPKKK19
Pop_G07G062455	2.6383e-88	0.265906	0.29	0.117	1.00799e-83	4	MES7
Pop_G07G062652	1.77748e-57	0.286031	0.718	0.525	6.79106e-53	4	HAT22
Pop_G08G046414	2.16586e-138	0.514206	0.598	0.308	8.27488e-134	4	---
Pop_G08G057858	1.88333e-97	0.44763	0.42	0.202	7.19546e-93	4	---
Pop_G08G057869	7.01528e-53	0.401053	0.832	0.689	2.68026e-48	4	---
Pop_G08G058423	3.17237e-48	0.294351	0.489	0.327	1.21204e-43	4	MAP1C
Pop_G08G058448	6.27851e-125	0.487609	0.463	0.215	2.39877e-120	4	---
Pop_G08G058504	2.3473e-69	0.384671	0.76	0.563	8.96809e-65	4	ALIS1
Pop_G08G058521	2.40683e-57	0.396509	0.787	0.6	9.19553e-53	4	---
Pop_G08G058532	9.8817e-79	0.301158	0.417	0.213	3.7754e-74	4	RPI2
Pop_G08G058594	1.95062e-46	0.252197	0.537	0.367	7.45255e-42	4	BPS1
Pop_G08G063513	8.66903e-42	0.324139	0.827	0.67	3.31209e-37	4	DREB2C
Pop_G09G014027	1.36261e-45	0.287716	0.998	0.99	5.206e-41	4	---
Pop_G09G014074	1.56934e-114	0.405794	0.511	0.26	5.99583e-110	4	---
Pop_G09G014141	4.04988e-93	0.599526	0.728	0.491	1.5473e-88	4	ZAT12
Pop_G09G014150	1.43109e-62	0.281879	0.655	0.441	5.46761e-58	4	EXO70H7
Pop_G09G015049	2.28394e-51	0.42503	0.414	0.249	8.72601e-47	4	PSK4
Pop_G09G022429	3.81119e-58	0.378241	0.305	0.149	1.4561e-53	4	---
Pop_G09G027802	3.64515e-34	0.256703	0.853	0.716	1.39267e-29	4	J2
Pop_G09G027884	4.96579e-28	0.280832	0.922	0.839	1.89723e-23	4	---
Pop_G09G030263	2.35455e-48	0.268579	0.569	0.397	8.99578e-44	4	---
Pop_G09G077551	1.38403e-116	0.339088	0.431	0.191	5.28782e-112	4	HEMA1
Pop_G10G000184	1.05145e-179	0.848142	0.543	0.242	4.01717e-175	4	---
Pop_G10G000185	4.41461e-143	0.491712	0.422	0.172	1.68665e-138	4	---
Pop_G10G001595	5.60593e-179	0.528099	0.316	0.089	2.1418e-174	4	---
Pop_G10G001640	9.68524e-69	0.348665	0.921	0.837	3.70034e-64	4	STP13
Pop_G10G007124	9.91199e-42	0.338534	0.517	0.361	3.78698e-37	4	---
Pop_G10G007208	3.3746e-44	0.388025	0.568	0.398	1.2893e-39	4	---
Pop_G10G007252	4.66887e-65	0.323215	0.836	0.645	1.78379e-60	4	HSPRO2
Pop_G10G007701	6.95505e-91	0.437112	0.448	0.225	2.65725e-86	4	---
Pop_G10G007703	1.76169e-80	0.556473	0.435	0.233	6.73073e-76	4	---
Pop_G10G020251	6.9972e-79	0.334622	0.5	0.277	2.67335e-74	4	---
Pop_G10G022858	2.30864e-76	0.292968	0.478	0.275	8.8204e-72	4	---
Pop_G10G022869	3.15322e-52	1.60782	0.274	0.14	1.20472e-47	4	---
Pop_G10G022924	1.30313e-56	0.316087	0.504	0.315	4.97875e-52	4	TL2
Pop_G10G047625	5.67929e-25	0.293927	0.411	0.289	2.16983e-20	4	---
Pop_G10G047975	3.40322e-59	0.324669	0.987	0.941	1.30023e-54	4	---
Pop_G10G048227	1.2115e-17	0.4769	0.368	0.288	4.62867e-13	4	---
Pop_G10G048252	1.64338e-63	0.350277	0.863	0.703	6.27871e-59	4	---
Pop_G10G048311	1.14014e-26	0.256519	0.471	0.351	4.35602e-22	4	---
Pop_G10G048381	6.80027e-45	0.434368	0.791	0.635	2.59811e-40	4	---
Pop_G11G070165	9.6435e-113	0.643784	0.446	0.213	3.6844e-108	4	---
Pop_G12G008878	5.60648e-106	0.394342	0.607	0.363	2.14201e-101	4	---
Pop_G12G035109	2.21175e-72	0.474326	0.581	0.361	8.45022e-68	4	---
Pop_G12G050765	5.08443e-77	0.507959	0.773	0.582	1.94256e-72	4	---
Pop_G12G050818	0	0.842019	0.434	0.108	0	4	HSR3
Pop_G12G068238	7.31702e-82	0.320014	0.995	0.981	2.79554e-77	4	---
Pop_G12G068293	2.83054e-74	0.353797	0.552	0.328	1.08144e-69	4	ATH6
Pop_G12G070036	9.7326e-64	0.357073	0.747	0.537	3.71844e-59	4	---
Pop_G12G086080	4.46359e-58	0.26471	0.506	0.315	1.70536e-53	4	---
Pop_G13G022244	8.18293e-29	0.332523	0.549	0.407	3.12637e-24	4	---
Pop_G13G022324	3.34832e-160	0.534321	0.648	0.334	1.27926e-155	4	---
Pop_G13G034774	1.04834e-82	0.357016	0.929	0.783	4.00527e-78	4	EP3
Pop_G13G070992	3.83079e-59	0.393761	0.555	0.374	1.46359e-54	4	SRC2
Pop_G13G071553	1.13374e-90	0.424478	0.76	0.535	4.33155e-86	4	---
Pop_G13G072474	3.62285e-29	0.470161	0.38	0.258	1.38415e-24	4	PBP1
Pop_G14G000606	1.94319e-67	0.257301	0.418	0.226	7.42414e-63	4	RHA1
Pop_G14G044107	1.01225e-52	0.25005	0.954	0.847	3.86739e-48	4	VEP1
Pop_G14G044304	1.81098e-285	0.943789	0.726	0.321	6.91902e-281	4	DDE2
Pop_G14G044307	8.96624e-139	0.598179	0.517	0.249	3.42564e-134	4	---
Pop_G14G044589	2.11805e-31	0.271184	0.716	0.572	8.09221e-27	4	---
Pop_A10G069262	2.64543e-31	0.543237	0.54	0.365	1.01071e-26	8	MYB108
Pop_G14G050992	8.05935e-82	0.316537	0.343	0.16	3.07915e-77	4	GolS1
Pop_G14G078035	2.24624e-90	0.429612	0.401	0.188	8.58199e-86	4	WRKY53
Pop_G14G078058	1.80041e-94	0.338868	0.508	0.273	6.87863e-90	4	UBDK GAMMA 4
Pop_G14G089113	5.11854e-207	0.761519	0.972	0.839	1.95559e-202	4	EFE
Pop_G15G048850	5.61535e-78	0.38551	0.922	0.792	2.1454e-73	4	SRO5
Pop_G15G074400	5.47288e-63	0.293407	0.464	0.275	2.09097e-58	4	---
Pop_G15G074701	2.12835e-99	0.374888	0.859	0.677	8.13157e-95	4	UBC10
Pop_G16G016326	2.172e-90	0.426911	0.811	0.599	8.29833e-86	4	LSR1
Pop_G16G025186	2.32662e-59	0.278122	0.409	0.223	8.88909e-55	4	UGT85A7
Pop_G16G025336	3.24663e-37	0.265958	0.457	0.311	1.24041e-32	4	SCL13
Pop_G16G025394	1.42545e-63	0.370738	0.35	0.176	5.44608e-59	4	---
Pop_G16G057565	1.93246e-116	0.448817	0.973	0.876	7.38316e-112	4	YLS9
Pop_G16G068485	3.64724e-34	0.326183	0.607	0.448	1.39346e-29	4	---
Pop_G16G068552	3.87262e-64	0.260158	0.295	0.142	1.47957e-59	4	CLC2
Pop_G16G068652	4.70573e-69	0.287162	0.668	0.471	1.79787e-64	4	PRA1.B4
Pop_G16G068843	9.07319e-65	0.284225	0.264	0.118	3.4665e-60	4	---
Pop_G16G068852	9.5278e-27	0.258503	0.337	0.226	3.64019e-22	4	---
Pop_G17G033277	1.66101e-37	0.32063	0.773	0.647	6.34606e-33	4	---
Pop_G17G066944	1.87815e-42	0.326861	0.704	0.538	7.17568e-38	4	HIR4
Pop_G18G018635	2.49701e-111	0.648591	0.656	0.399	9.54008e-107	4	TIL
Pop_G18G078385	5.84999e-97	0.474123	0.744	0.503	2.23505e-92	4	WRKY40
Pop_G18G078460	4.4966e-53	0.337855	0.985	0.938	1.71797e-48	4	---
Pop_G18G080147	1.46681e-60	0.28408	0.796	0.61	5.60411e-56	4	SnRK3.4
Pop_G18G080154	8.93387e-59	0.278407	0.658	0.463	3.41328e-54	4	COL5
Pop_G18G080227	3.29001e-71	0.492325	0.602	0.403	1.25698e-66	4	---
Pop_G18G083239	2.31701e-84	0.430523	0.776	0.539	8.85236e-80	4	ATAGP22
Pop_G19G007568	2.02977e-59	0.253668	0.399	0.225	7.75492e-55	4	---
Pop_G19G009235	1.28011e-156	0.583492	0.776	0.495	4.8908e-152	4	---
Pop_G19G009775	1.39958e-30	0.254519	0.69	0.538	5.34723e-26	4	---
Pop_G19G034313	6.61033e-53	0.304459	0.414	0.249	2.52554e-48	4	---
Pop_G19G084139	7.25528e-55	0.303928	0.82	0.656	2.77195e-50	4	---
Pop_G19G084142	4.29086e-69	0.324968	0.467	0.269	1.63937e-64	4	---
Pop_UnG035649	2.97362e-73	0.443923	0.571	0.373	1.1361e-68	4	BPS1
Pop_UnG069786	5.21672e-24	0.293792	0.767	0.665	1.9931e-19	4	---
Pop_UnG069985	2.53282e-70	0.636745	0.831	0.681	9.67688e-66	4	HSP21
Pop_A01G003820	6.22247e-38	0.552959	0.464	0.313	2.37736e-33	5	LOX3
Pop_A01G003948	1.43199e-88	0.819368	0.433	0.216	5.47106e-84	5	ATACX1
Pop_A01G003988	4.3275e-141	0.567077	0.343	0.107	1.65336e-136	5	---
Pop_A01G004130	4.63145e-90	0.583941	0.46	0.227	1.76949e-85	5	---
Pop_A01G004172	4.60521e-66	0.334354	0.256	0.099	1.75947e-61	5	RHD7
Pop_A01G010137	9.60334e-255	0.886172	0.316	0.055	3.66905e-250	5	ATAGP1
Pop_A01G010149	4.01974e-08	0.258031	0.583	0.548	0.00153578	5	ACT7
Pop_A01G010209	1.06346e-32	0.359654	0.422	0.277	4.06306e-28	5	LEJ2
Pop_A01G010289	3.0468e-13	0.300594	0.518	0.442	1.16406e-08	5	---
Pop_A01G010311	0	0.801175	0.296	0.034	0	5	ATAKN1
Pop_A01G010338	3.94971e-66	0.577779	0.361	0.175	1.50903e-61	5	---
Pop_A01G017616	7.09244e-202	0.478302	0.28	0.054	2.70974e-197	5	---
Pop_A01G017618	7.70482e-12	0.375749	0.545	0.499	2.9437e-07	5	PAT1
Pop_A01G024883	0	0.777363	0.316	0.019	0	5	PSBR
Pop_A01G024923	3.0971e-43	0.461938	0.508	0.342	1.18328e-38	5	---
Pop_A01G025065	1.24467e-261	1.15534	0.404	0.09	4.7554e-257	5	---
Pop_A01G025083	5.24929e-36	0.495721	0.417	0.278	2.00554e-31	5	CP5
Pop_A01G025085	9.76438e-188	0.822936	0.284	0.059	3.73058e-183	5
Pop_A01G025086	0	1.34359	0.506	0.123	0	5	---
Pop_A01G032078	6.30164e-92	0.513816	0.302	0.112	2.40761e-87	5	RbcX2
Pop_A01G032089	0	0.776634	0.265	0.026	0	5
Pop_A01G032221	0	0.789493	0.38	0.049	0	5	RPL27
Pop_A01G032246	1.19462e-142	0.473548	0.295	0.078	4.56417e-138	5	GHS1
Pop_A01G054550	2.84264e-27	0.683928	0.384	0.267	1.08606e-22	5	---
Pop_A01G054551	2.36536e-32	0.3313	0.316	0.186	9.03708e-28	5	VAMP714
Pop_A01G054649	4.78537e-18	0.271994	0.348	0.253	1.8283e-13	5
Pop_A01G054653	1.2107e-14	0.250331	0.291	0.209	4.6256e-10	5	LHCB6
Pop_A01G058798	4.78256e-259	0.89998	0.552	0.17	1.82722e-254	5	VTC2
Pop_A01G058816	6.16872e-21	0.250369	0.326	0.219	2.35682e-16	5	ATAPA1
Pop_A01G058846	1.78937e-41	0.421643	0.376	0.225	6.83648e-37	5	RPL12-A
Pop_A01G059945	0	1.33312	0.53	0.073	0	5	PSAF
Pop_A01G074856	3.17359e-119	0.635597	0.284	0.083	1.2125e-114	5	CCL
Pop_A01G075022	1.31833e-33	0.439032	0.276	0.15	5.03683e-29	5	---
Pop_A01G075080	0	0.697552	0.286	0.017	0	5	LHCB3*1
Pop_A01G080026	1.18766e-14	0.34052	0.306	0.221	4.53759e-10	5	Toc12
Pop_A01G081113	0	0.611279	0.284	0.029	0	5
Pop_A01G081135	0	0.988281	0.435	0.037	0	5	---
Pop_A01G081815	3.19535e-127	0.806778	0.317	0.101	1.22081e-122	5	PSAG
Pop_A02G004962	1.14458e-21	0.414859	0.697	0.623	4.37297e-17	5	---
Pop_A02G005104	9.38804e-38	0.470967	0.581	0.458	3.5868e-33	5	CAT2
Pop_A02G005398	0	1.19425	0.495	0.054	0	5	PSII-P
Pop_A02G005399	1.24736e-44	0.507956	0.458	0.3	4.76567e-40	5	---
Pop_A02G012239	2.05006e-54	0.475071	0.321	0.156	7.83247e-50	5	---
Pop_A02G012307	8.5801e-42	0.633264	0.43	0.269	3.27811e-37	5	---
Pop_A02G012330	0	0.839946	0.415	0.067	0	5	---
Pop_A02G012456	2.38858e-61	0.524918	0.426	0.238	9.12579e-57	5	PDH-E1 ALPHA
Pop_A02G012479	1.53716e-94	0.563312	0.335	0.128	5.87286e-90	5	---
Pop_A02G012616	1.987e-73	0.50748	0.822	0.704	7.59153e-69	5	CP12-2
Pop_A02G012634	1.21396e-10	0.288581	0.285	0.223	4.63807e-06	5	---
Pop_A02G031350	1.68517e-09	0.278389	0.653	0.61	6.43835e-05	5	GSTF6
Pop_A02G032941	0	0.970213	0.397	0.052	0	5	PSAE-2
Pop_A02G066068	2.20742e-18	0.370715	0.339	0.236	8.43368e-14	5	ZAT10
Pop_A02G066077	9.43591e-122	0.804044	0.549	0.283	3.60508e-117	5	---
Pop_A02G088609	1.15552e-262	0.972014	0.31	0.051	4.41479e-258	5	EXO
Pop_A02G088653	8.06601e-60	0.70919	0.482	0.295	3.0817e-55	5	---
Pop_A03G019809	5.97864e-43	0.38229	0.356	0.206	2.2842e-38	5	---
Pop_A03G019934	6.07636e-20	0.428385	0.431	0.328	2.32154e-15	5	WRKY40
Pop_A03G020132	2.34016e-07	0.387489	0.459	0.425	0.00894083	5	---
Pop_A03G035515	2.92503e-17	0.295894	0.326	0.23	1.11754e-12	5	---
Pop_A03G049262	0	1.20385	0.583	0.129	0	5	FED A
Pop_A03G049427	2.44383e-23	0.365671	0.5	0.408	9.33691e-19	5	NFU2
Pop_A03G049667	1.95216e-22	0.426221	0.519	0.428	7.45841e-18	5	VPS46.1
Pop_A03G049815	0	1.89835	0.778	0.153	0	5	PSI-H
Pop_A03G050032	3.13097e-64	0.4044	0.296	0.128	1.19622e-59	5	RPS12B
Pop_A03G050111	5.79223e-11	0.277623	0.685	0.655	2.21298e-06	5	RABD2A
Pop_A03G050143	1.31928e-70	0.58761	0.747	0.615	5.04043e-66	5	RPS7.2
Pop_A03G050192	0	1.11144	0.487	0.066	0	5	---
Pop_A03G050333	2.21952e-241	0.729858	0.361	0.076	8.47989e-237	5	ACBP6
Pop_A03G050335	5.67063e-23	0.36257	0.403	0.288	2.16652e-18	5	AOX1D
Pop_A03G050440	2.91341e-08	0.254582	0.273	0.213	0.0011131	5	VAC-INV
Pop_A03G050556	2.5104e-120	0.792895	0.371	0.137	9.59122e-116	5	RBL2
Pop_A03G076452	2.11361e-39	0.461801	0.614	0.488	8.07526e-35	5	Cpn60beta2
Pop_A04G002554	1.03624e-27	0.384318	0.419	0.292	3.95908e-23	5	AKR2B
Pop_A04G002635	6.10047e-79	0.964721	0.383	0.184	2.33075e-74	5	ARF15
Pop_A04G002666	1.70679e-90	0.621111	0.455	0.228	6.52094e-86	5	RPL9
Pop_A04G002688	3.73109e-151	0.567291	0.263	0.06	1.4255e-146	5	---
Pop_A04G010847	2.66568e-114	0.680567	0.869	0.764	1.01845e-109	5	---
Pop_A04G018139	1.04517e-28	0.53439	0.515	0.392	3.99317e-24	5	---
Pop_A04G018173	0	0.77102	0.337	0.035	0	5	PSII-Q
Pop_A04G019582	1.19026e-56	0.30977	0.284	0.125	4.54751e-52	5	HB-1
Pop_A04G026290	0	1.10162	0.31	0.022	0	5	RBCS1A
Pop_A04G026314	5.15938e-74	0.583469	0.851	0.741	1.97119e-69	5	AOC3
Pop_A04G026343	4.32026e-12	0.338886	0.515	0.453	1.6506e-07	5	CML23
Pop_A04G029143	2.37939e-21	0.40086	0.466	0.358	9.0907e-17	5	SGT1B
Pop_A04G029208	9.06056e-62	0.550422	0.652	0.499	3.46168e-57	5	---
Pop_A04G029253	9.31384e-07	0.335401	0.346	0.307	0.0355845	5	---
Pop_A04G030612	1.18971e-82	0.770677	0.315	0.124	4.54542e-78	5	RRTF1
Pop_A04G059322	1.51744e-17	0.275339	0.416	0.316	5.79754e-13	5	---
Pop_A04G059340	5.24139e-125	0.694419	0.286	0.082	2.00253e-120	5	CAF1b
Pop_A04G059456	5.20878e-14	0.410896	0.495	0.455	1.99007e-09	5	HSC70-7
Pop_A04G060285	3.46101e-11	0.327782	0.75	0.753	1.32231e-06	5	---
Pop_A04G070728	8.0197e-40	0.477376	0.5	0.336	3.064e-35	5	ROC3
Pop_A05G001730	2.36404e-188	0.74824	0.422	0.129	9.03205e-184	5	PSII-P
Pop_A05G001758	0	1.27622	0.46	0.07	0	5	PSBW
Pop_A05G001794	1.21858e-40	0.328097	0.362	0.213	4.65571e-36	5	BS14A
Pop_A05G001994	0	1.39388	0.299	0.022	0	5	LHCB1.4
Pop_A05G002026	1.87473e-131	0.789239	0.447	0.174	7.1626e-127	5	---
Pop_A05G002093	3.02171e-99	0.726361	0.821	0.651	1.15447e-94	5	ERD14
Pop_A05G002100	5.71192e-19	0.288297	0.276	0.176	2.1823e-14	5	LOG5
Pop_A05G057060	1.0405e-07	0.268425	0.595	0.579	0.00397533	5	BZIP60
Pop_A05G057105	0	0.794197	0.368	0.035	0	5	GAPB
Pop_A05G071793	2.39846e-141	0.595265	0.332	0.099	9.16356e-137	5	GME
Pop_A05G073161	0	0.800987	0.335	0.014	0	5	FNR1
Pop_A05G073203	1.04692e-134	0.852899	0.545	0.247	3.99987e-130	5	SIMIP
Pop_A06G053309	7.41012e-14	0.267194	0.351	0.266	2.83111e-09	5	HSFA2
Pop_A06G053337	9.05658e-27	0.430767	0.731	0.695	3.46016e-22	5	HSP17.6II
Pop_A06G053389	1.05639e-39	0.496589	0.48	0.333	4.03605e-35	5	COPT5
Pop_A06G053492	1.30869e-198	0.54789	0.251	0.044	4.99999e-194	5	NAC090
Pop_A06G053771	8.83023e-23	0.381696	0.561	0.474	3.37368e-18	5	---
Pop_A06G053793	0	0.626371	0.292	0.031	0	5	GLDP1
Pop_A06G061427	6.90207e-135	0.453213	0.251	0.061	2.637e-130	5	---
Pop_A06G061445	1.49927e-96	0.66254	0.853	0.7	5.72811e-92	5	MT2A
Pop_A06G061559	1.30202e-39	0.548136	0.443	0.291	4.9745e-35	5	---
Pop_A06G061759	6.5871e-42	0.346898	0.487	0.317	2.51667e-37	5	---
Pop_A06G061801	1.63315e-88	0.383628	0.253	0.083	6.23963e-84	5	---
Pop_A06G061858	1.13533e-20	0.288739	0.341	0.237	4.33766e-16	5	ACD11
Pop_A06G062109	9.93948e-20	0.347549	0.853	0.844	3.79748e-15	5	---
Pop_A06G062252	6.23299e-52	0.49014	0.4	0.23	2.38138e-47	5	LSR1
Pop_A06G062895	5.05754e-142	0.680912	0.415	0.154	1.93228e-137	5	GPX1
Pop_A06G063006	2.556e-271	0.681834	0.327	0.057	9.76544e-267	5	---
Pop_A06G063205	4.88924e-136	0.62885	0.284	0.077	1.86798e-131	5	PSAK
Pop_A06G064886	3.05014e-65	0.563944	0.3	0.131	1.16534e-60	5	GAE1
Pop_A06G079378	1.338e-38	0.329589	0.837	0.807	5.11196e-34	5	TIFY10A
Pop_A06G079388	1.9581e-65	0.603544	0.64	0.473	7.48113e-61	5	CPN21
Pop_A06G079398	1.98287e-280	0.589475	0.281	0.039	7.57574e-276	5	PRXQ
Pop_A06G085686	3.25208e-15	0.281343	0.448	0.368	1.24249e-10	5	---
Pop_A06G085807	2.55537e-48	1.67978	0.494	0.375	9.76303e-44	5	PAL1
Pop_A06G089512	4.63902e-12	0.403063	0.314	0.239	1.77238e-07	5	---
Pop_A07G006439	9.65639e-22	0.638991	0.571	0.483	3.68932e-17	5	---
Pop_A07G006548	1.71977e-28	0.374787	0.749	0.659	6.57057e-24	5	---
Pop_A07G022768	7.97007e-14	0.259099	0.349	0.268	3.04505e-09	5	FRO1
Pop_A07G022822	0	0.993498	0.337	0.023	0	5	PSBO1
Pop_A07G085213	2.74104e-49	0.440931	0.639	0.494	1.04724e-44	5	---
Pop_A07G085214	1.00935e-48	0.491181	0.62	0.451	3.85631e-44	5	PSAA
Pop_A07G085219	2.91529e-107	0.58013	0.903	0.841	1.11381e-102	5	PSBC
Pop_A08G002373	5.76271e-22	0.377998	0.53	0.434	2.2017e-17	5	VMA10
Pop_A08G009087	6.56584e-15	0.305363	0.532	0.452	2.50854e-10	5	TCTP
Pop_A08G063395	9.96979e-15	0.293678	0.838	0.801	3.80906e-10	5	---
Pop_A08G063398	1.49821e-26	0.497738	0.796	0.784	5.72408e-22	5	---
Pop_A08G063466	1.84608e-65	0.558438	0.412	0.217	7.05313e-61	5	ZFAR1
Pop_A08G063815	3.20765e-43	0.480156	0.623	0.492	1.22552e-38	5	A/N-InvC
Pop_A08G063896	4.76336e-39	0.293387	0.277	0.141	1.81989e-34	5	UBC7
Pop_A08G063986	3.90833e-53	0.627248	0.453	0.277	1.49322e-48	5	AOC3
Pop_A08G064105	4.44832e-18	0.425941	0.535	0.444	1.69953e-13	5	RPI2
Pop_A08G064200	3.05739e-17	0.450073	0.519	0.429	1.16811e-12	5	---
Pop_A09G014532	1.26377e-177	0.789633	0.525	0.202	4.82834e-173	5	MT2A
Pop_A09G015364	6.10963e-30	0.376673	0.344	0.215	2.33424e-25	5	MSRB2
Pop_A09G015375	0	0.854304	0.435	0.077	0	5	PMDH1
Pop_A09G026588	1.2784e-46	0.404921	0.335	0.179	4.88425e-42	5	ISPH
Pop_A09G026748	1.82505e-11	0.280526	0.304	0.229	6.9728e-07	5	---
Pop_A09G028863	1.80274e-71	0.721675	0.49	0.292	6.88754e-67	5	MPK3
Pop_A09G028885	1.91021e-21	0.353881	0.704	0.661	7.29816e-17	5	SAP5
Pop_A09G029081	1.10022e-53	0.682577	0.307	0.149	4.20351e-49	5	DIN6
Pop_A09G029087	3.34125e-23	0.357966	0.416	0.31	1.27656e-18	5	---
Pop_A09G059526	3.79634e-07	0.256923	0.458	0.402	0.0145043	5	ZAT12
Pop_A09G076709	1.74029e-198	0.787114	0.323	0.072	6.64895e-194	5	---
Pop_A09G076797	8.87015e-93	0.672711	0.361	0.152	3.38893e-88	5	AXS2
Pop_A09G076814	9.1542e-114	0.859218	0.659	0.398	3.49745e-109	5	---
Pop_A09G076897	0	1.23622	0.514	0.121	0	5	EXPL2
Pop_A09G076979	5.45727e-210	0.475962	0.287	0.055	2.085e-205	5	APX3
Pop_A09G083579	2.04932e-09	0.374804	0.648	0.687	7.82964e-05	5	J2
Pop_A09G083589	8.44234e-25	0.258434	0.311	0.196	3.22548e-20	5	SDH6
Pop_A09G083626	8.44034e-101	0.59891	0.341	0.131	3.22472e-96	5	ISPG
Pop_A10G001121	3.91504e-107	0.791683	0.683	0.485	1.49578e-102	5	TCTP
Pop_A10G001182	3.58438e-87	0.438731	0.267	0.092	1.36945e-82	5	---
Pop_A10G001227	6.67417e-117	0.453914	0.275	0.081	2.54993e-112	5	EMB3105
Pop_A10G001384	1.43541e-15	0.273789	0.567	0.5	5.48413e-11	5	---
Pop_A10G046621	4.16394e-181	1.04635	0.657	0.332	1.59087e-176	5	ATX1
Pop_A10G046776	7.54195e-85	0.816882	0.549	0.321	2.88148e-80	5	PIP2A
Pop_A10G046793	0	1.54942	0.637	0.118	0	5	LHCA1
Pop_A10G046826	7.06115e-33	0.512461	0.251	0.134	2.69778e-28	5	---
Pop_A10G046919	4.26633e-32	0.368668	0.344	0.213	1.63e-27	5	---
Pop_A10G047004	6.50289e-290	0.644962	0.266	0.033	2.48449e-285	5	RCA
Pop_A10G047088	1.34061e-14	0.25083	0.526	0.424	5.12195e-10	5	---
Pop_A10G047143	4.25476e-51	0.288426	0.265	0.117	1.62557e-46	5	PLC2
Pop_A10G047199	2.57316e-112	0.725418	0.445	0.195	9.83102e-108	5	DHAR2
Pop_A10G047548	1.09949e-112	0.739049	0.451	0.202	4.20071e-108	5	YCF32
Pop_A10G047620	0	0.782004	0.372	0.046	0	5	GGT2
Pop_A10G047661	1.48992e-60	0.771992	0.402	0.219	5.69238e-56	5	---
Pop_A10G048619	1.34094e-177	0.606306	0.307	0.073	5.12321e-173	5	PSAD-2
Pop_A10G048629	8.40736e-19	0.300783	0.427	0.329	3.21212e-14	5	HSP70T-2
Pop_A10G048656	4.36942e-76	0.590802	0.296	0.119	1.66938e-71	5	---
Pop_A10G048701	4.84048e-24	0.296667	0.355	0.239	1.84935e-19	5	---
Pop_A10G069183	5.18306e-33	0.341954	0.518	0.369	1.98024e-28	5	---
Pop_A10G069268	0	1.6756	0.833	0.349	0	5	HS1
Pop_A10G069269	0	1.79046	0.77	0.363	0	5	HS1
Pop_A10G069629	5.97833e-20	0.362423	0.286	0.186	2.28408e-15	5	FAD8
Pop_A10G069683	1.04674e-184	0.862837	0.689	0.322	3.99919e-180	5	NRP1
Pop_A11G020316	3.24221e-118	0.702924	0.367	0.135	1.23872e-113	5	LHCB3*1
Pop_A11G020338	6.03993e-19	0.360911	0.475	0.39	2.30762e-14	5	---
Pop_A11G021692	1.72183e-98	0.53577	0.319	0.114	6.57843e-94	5	---
Pop_A11G021726	7.86391e-254	0.520137	0.293	0.048	3.00449e-249	5	MSRB1
Pop_A11G026239	4.11964e-136	0.520568	0.311	0.089	1.57395e-131	5	GLX1
Pop_A11G086323	8.38741e-196	0.680315	0.352	0.086	3.20449e-191	5	VTC2
Pop_A11G091412	7.10448e-298	1.43967	0.495	0.128	2.71434e-293	5	LHCB1.4
Pop_A11G091414	1.21841e-33	0.564648	0.354	0.219	4.65506e-29	5	TIFY5A
Pop_A12G007810	9.01135e-35	0.426719	0.391	0.241	3.44288e-30	5	BAG7
Pop_A12G008027	1.95355e-18	0.372261	0.259	0.169	7.46374e-14	5	---
Pop_A12G019230	3.88756e-92	0.632264	0.756	0.613	1.48528e-87	5	---
Pop_A12G019292	1.22289e-110	0.706676	0.616	0.372	4.67218e-106	5	ISU1
Pop_A12G019387	0	0.968489	0.431	0.071	0	5	PnsB4
Pop_A12G027573	2.01231e-117	0.744679	0.672	0.461	7.68823e-113	5	PMSR4
Pop_A12G067933	1.56538e-296	0.686777	0.311	0.046	5.98067e-292	5	ACP4
Pop_A12G067946	7.12622e-15	0.269266	0.287	0.205	2.72264e-10	5	---
Pop_A12G068028	9.90864e-44	0.416018	0.308	0.163	3.78569e-39	5	TZP5
Pop_A12G068081	3.21433e-106	0.543665	0.52	0.249	1.22807e-101	5	GAPC2
Pop_A12G068087	2.29236e-254	0.700439	0.331	0.062	8.75819e-250	5	NDPK2
Pop_A12G068213	3.52609e-07	0.28587	0.414	0.361	0.0134718	5	---
Pop_A12G073814	3.85909e-26	0.397378	0.46	0.331	1.4744e-21	5	---
Pop_A12G073879	4.96435e-17	0.296843	0.535	0.447	1.89668e-12	5	---
Pop_A12G073882	5.01422e-40	0.269158	0.259	0.127	1.91573e-35	5	---
Pop_A12G081583	1.44555e-09	0.346906	0.433	0.363	5.52285e-05	5	HSP21
Pop_A13G009807	2.13973e-29	0.572649	0.525	0.405	8.17505e-25	5	---
Pop_A13G010026	8.98433e-17	0.286196	0.295	0.206	3.43255e-12	5	---
Pop_A13G031144	4.16452e-18	0.462438	0.291	0.198	1.5911e-13	5	EXPA8
Pop_A13G031212	1.03e-111	0.515976	0.331	0.115	3.9352e-107	5	CBSX3
Pop_A13G031277	0	0.644373	0.321	0.022	0	5	PGR1
Pop_A13G032448	1.48301e-13	0.44573	0.434	0.357	5.66599e-09	5	---
Pop_A13G032485	0	0.946565	0.464	0.086	0	5	SSR16
Pop_A13G054116	7.71635e-65	0.511715	0.269	0.11	2.94811e-60	5	BIP1
Pop_A13G054446	5.31096e-07	0.29031	0.668	0.656	0.0202911	5	---
Pop_A14G000324	1.33392e-11	0.256238	0.469	0.386	5.09636e-07	5	DDE2
Pop_A14G000691	4.97033e-239	0.80934	0.251	0.036	1.89896e-234	5	---
Pop_A14G029781	3.91783e-19	0.302725	0.38	0.273	1.49685e-14	5	---
Pop_A14G029822	1.42827e-11	0.259293	0.667	0.61	5.45683e-07	5	ZAT10
Pop_A14G044024	9.62077e-12	0.602423	0.385	0.324	3.67571e-07	5	GolS1
Pop_A14G044719	2.94213e-98	0.569767	0.339	0.129	1.12407e-93	5	---
Pop_A14G044984	3.01864e-12	0.373599	0.61	0.552	1.1533e-07	5	---
Pop_A14G045339	2.28723e-62	0.350804	0.301	0.134	8.73859e-58	5	---
Pop_A14G045517	4.40147e-75	0.717075	0.368	0.174	1.68163e-70	5	LHCA3
Pop_A14G045556	0	1.35276	0.595	0.091	0	5	---
Pop_A15G017148	3.90205e-99	0.900802	0.286	0.098	1.49082e-94	5	PAO1
Pop_A15G017276	0	1.34737	0.588	0.154	0	5	LHCA4
Pop_A15G048992	1.8671e-113	0.389274	0.266	0.078	7.13343e-109	5	---
Pop_A15G064323	3.43405e-49	0.333184	0.266	0.123	1.31201e-44	5	TIFY6B
Pop_A16G017495	7.59389e-186	0.631914	0.391	0.111	2.90132e-181	5	APX2
Pop_A16G030769	3.27476e-21	0.3634	0.689	0.63	1.25116e-16	5	LSR1
Pop_A16G030787	9.00863e-13	0.663198	0.296	0.223	3.44184e-08	5	LEA4-5
Pop_A16G055209	1.68088e-28	0.457636	0.394	0.281	6.42195e-24	5	---
Pop_A16G090177	0	0.615674	0.257	0.017	0	5	PSRP4
Pop_A17G011744	1.00836e-70	0.727059	0.46	0.25	3.85255e-66	5	---
Pop_A17G021131	0	2.1484	0.764	0.204	0	5	RBCS1A
Pop_A17G021803	1.07608e-117	0.588422	0.258	0.071	4.11127e-113	5	UCP5
Pop_A17G052691	5.66839e-15	0.398508	0.52	0.444	2.16566e-10	5	TAT7
Pop_A17G052721	9.84251e-66	0.783165	0.587	0.392	3.76043e-61	5	---
Pop_A17G075184	6.69017e-87	0.499088	0.265	0.089	2.55604e-82	5	---
Pop_A18G012958	7.79042e-22	0.326105	0.344	0.234	2.97641e-17	5	PSAK
Pop_A18G012963	9.41159e-206	0.710352	0.288	0.056	3.59579e-201	5	---
Pop_A18G013026	7.82217e-57	0.576482	0.624	0.458	2.98854e-52	5	---
Pop_A18G013064	2.22245e-189	0.96505	0.662	0.343	8.4911e-185	5	MAPR2
Pop_A18G018736	4.44914e-14	0.319776	0.44	0.36	1.69984e-09	5	COX6B
Pop_A18G018737	2.23723e-70	0.718529	0.614	0.414	8.54758e-66	5	TET8
Pop_A18G018980	1.09014e-40	0.4063	0.305	0.158	4.16498e-36	5	---
Pop_A18G083152	3.01791e-16	0.273107	0.362	0.267	1.15302e-11	5	CPN21
Pop_A18G089843	6.69542e-31	0.573575	0.429	0.307	2.55805e-26	5	TIL
Pop_A19G052337	0	0.892484	0.427	0.059	0	5	ENH1
Pop_A19G052542	2.00364e-158	0.859945	0.583	0.26	7.65511e-154	5	---
Pop_A19G052877	3.4663e-39	0.349559	0.272	0.139	1.32433e-34	5	NDHI
Pop_A19G052879	2.98591e-84	0.562024	0.802	0.719	1.1408e-79	5	RPL2.1
Pop_A19G053004	0	1.3469	0.53	0.134	0	5	LHCB5
Pop_A19G053066	3.17221e-07	0.31855	0.739	0.761	0.0121197	5	---
Pop_A19G054928	2.13829e-79	0.416325	0.261	0.094	8.16955e-75	5	PGR1
Pop_A19G055148	7.27542e-34	1.0701	0.529	0.431	2.77965e-29	5	---
Pop_G01G002944	0	1.43507	0.614	0.112	0	5	PSAF
Pop_G01G004886	1.59105e-51	0.540115	0.754	0.615	6.07875e-47	5	LOX3
Pop_G01G013341	0	0.952681	0.351	0.031	0	5	LHCB3*1
Pop_G01G016590	2.52557e-35	0.32978	0.307	0.171	9.6492e-31	5	PLDALPHA2
Pop_G01G020658	3.15702e-50	0.510463	0.632	0.476	1.20617e-45	5	RbcX2
Pop_G01G020769	0	0.967725	0.346	0.048	0	5	---
Pop_G01G020943	1.85227e-126	0.571984	0.396	0.144	7.07677e-122	5	CHR5
Pop_G01G020986	0	1.06744	0.431	0.042	0	5	---
Pop_G01G024709	1.75331e-41	0.572911	0.336	0.188	6.69871e-37	5	---
Pop_G01G024755	5.09663e-78	0.642941	0.599	0.404	1.94722e-73	5	UBC28
Pop_G01G026121	0	0.607322	0.287	0.018	0	5	---
Pop_G01G058646	0	1.02389	0.389	0.037	0	5	SABP3
Pop_G01G058773	9.15573e-27	0.395057	0.343	0.23	3.49804e-22	5	RPL12-A
Pop_G01G058979	3.34879e-34	0.365991	0.411	0.261	1.27944e-29	5	---
Pop_G01G067375	2.03442e-66	0.638416	0.355	0.171	7.7727e-62	5	---
Pop_G01G067447	4.55666e-27	0.386182	0.614	0.5	1.74092e-22	5	---
Pop_G01G067530	3.72943e-15	0.250599	0.442	0.351	1.42487e-10	5	PABP8
Pop_G01G067765	4.82624e-14	0.309483	0.301	0.218	1.84391e-09	5	LHCB6
Pop_G01G072431	0	1.71891	0.664	0.096	0	5	PSBR
Pop_G01G074635	0	1.39154	0.593	0.139	0	5	LHCA2
Pop_G01G075615	5.93689e-22	0.369021	0.312	0.206	2.26825e-17	5	Toc12
Pop_G01G075768	5.81601e-30	0.480901	0.443	0.307	2.22206e-25	5	WRKY40
Pop_G01G082006	7.35536e-93	0.648165	0.326	0.127	2.81019e-88	5	CP5
Pop_G01G089924	2.22542e-53	0.491219	0.485	0.311	8.50244e-49	5	TIF4A1
Pop_G01G090344	0	0.533618	0.271	0.021	0	5	RPL27
Pop_G01G090364	4.32824e-213	0.478475	0.273	0.049	1.65365e-208	5	GHS1
Pop_G02G005312	3.78109e-13	0.289783	0.268	0.191	1.4446e-08	5
Pop_G02G005589	4.04555e-51	0.449803	0.33	0.17	1.54564e-46	5	---
Pop_G02G015875	9.29425e-277	0.697985	0.346	0.063	3.55096e-272	5	PSAL
Pop_G02G030896	2.4356e-57	0.621466	0.617	0.439	9.30546e-53	5	---
Pop_G02G030987	0	0.632424	0.336	0.041	0	5	---
Pop_G02G031012	4.70738e-21	0.570913	0.294	0.195	1.7985e-16	5	---
Pop_G02G064940	2.83039e-68	0.469314	0.362	0.175	1.08138e-63	5	VAR1
Pop_G02G064979	0	0.921292	0.314	0.026	0	5	GSTF11
Pop_G02G065144	2.9098e-77	0.645223	0.8	0.67	1.11172e-72	5	TRX1
Pop_G02G065181	5.97235e-181	0.649329	0.369	0.104	2.28179e-176	5	emb2184
Pop_G02G065387	6.90614e-50	0.422446	0.305	0.153	2.63856e-45	5	CAT2
Pop_G02G065438	4.59e-13	0.309853	0.538	0.459	1.75365e-08	5	XTR7
Pop_G02G065695	1.06943e-46	0.3539	0.283	0.141	4.08588e-42	5	HEMB1
Pop_G02G065698	2.21061e-22	0.264033	0.253	0.153	8.44584e-18	5	AVA-P2
Pop_G02G065706	3.93327e-217	0.838147	0.425	0.118	1.50275e-212	5	PSBS
Pop_G02G065927	1.00335e-33	0.531039	0.431	0.287	3.8334e-29	5	---
Pop_G02G066018	0	1.36327	0.545	0.071	0	5	PSII-P
Pop_G02G080407	0	0.75169	0.324	0.035	0	5	LHCB2.2
Pop_G02G080457	2.01231e-21	0.432392	0.336	0.225	7.68825e-17	5	EFE
Pop_G03G010464	0	1.15431	0.491	0.062	0	5	PSI-H
Pop_G03G010466	5.86472e-106	0.394608	0.251	0.074	2.24067e-101	5	---
Pop_G03G011261	6.93873e-14	0.399007	0.647	0.593	2.65101e-09	5	---
Pop_G03G013482	1.34649e-08	0.257455	0.47	0.425	0.000514439	5	---
Pop_G03G013554	0	0.95734	0.435	0.051	0	5	---
Pop_G03G013635	2.0587e-128	0.545306	0.289	0.081	7.86547e-124	5	TSD1
Pop_G03G013649	2.27036e-26	0.480102	0.445	0.322	8.67414e-22	5	TIFY9
Pop_G03G013944	5.20486e-19	0.503586	0.483	0.399	1.98857e-14	5	---
Pop_G03G050589	4.10159e-71	0.57924	0.508	0.306	1.56706e-66	5	PHGPX
Pop_G03G050614	4.85054e-41	0.326604	0.4	0.231	1.8532e-36	5	TMP-C
Pop_G03G055549	2.26492e-61	0.421479	0.465	0.253	8.65335e-57	5	CYSB
Pop_G03G055684	7.24134e-27	0.432554	0.482	0.351	2.76663e-22	5	WRKY40
Pop_G03G078151	1.92184e-07	0.274143	0.271	0.216	0.00734256	5	AOX1D
Pop_G03G078196	1.48938e-26	0.306535	0.288	0.172	5.69034e-22	5	PRK
Pop_G04G002482	5.82186e-11	0.353001	0.565	0.535	2.2243e-06	5	HSC70-7
Pop_G04G002498	4.94613e-83	0.623018	0.55	0.34	1.88972e-78	5	---
Pop_G04G002510	3.13389e-50	0.365724	0.283	0.136	1.19733e-45	5	RABD1
Pop_G04G010703	2.36005e-25	0.381717	0.492	0.379	9.0168e-21	5	---
Pop_G04G023397	1.18022e-92	0.369602	0.261	0.085	4.50914e-88	5	---
Pop_G04G023408	3.48158e-26	0.544866	0.529	0.415	1.33017e-21	5	---
Pop_G04G023413	4.10208e-50	0.4868	0.566	0.387	1.56724e-45	5	---
Pop_G04G028077	4.53897e-09	0.254831	0.347	0.282	0.000173416	5	RABG3F
Pop_G04G028135	3.85251e-45	0.413605	0.853	0.79	1.47189e-40	5	SPE2
Pop_G04G028162	1.41708e-11	0.327714	0.267	0.196	5.4141e-07	5	---
Pop_G04G028204	0	0.717916	0.356	0.045	0	5	RPS7.2
Pop_G04G028221	0	0.856006	0.356	0.016	0	5	FBA2
Pop_G04G059140	0	1.09232	0.402	0.034	0	5	FED A
Pop_G04G060050	3.73734e-96	0.755745	0.485	0.249	1.42789e-91	5	AXS2
Pop_G04G060058	2.56832e-38	0.355199	0.341	0.193	9.81252e-34	5	---
Pop_G04G060073	6.23775e-202	0.732814	0.311	0.065	2.38319e-197	5	CAF1b
Pop_G04G060084	0	1.54683	0.603	0.088	0	5	PSAO
Pop_G04G060097	1.99437e-21	0.290837	0.527	0.43	7.61967e-17	5	EIN3
Pop_G04G060209	4.64803e-161	0.459274	0.267	0.06	1.77582e-156	5	APX3
Pop_G04G066467	6.18966e-15	0.321924	0.531	0.451	2.36482e-10	5	SGT1B
Pop_G04G066751	3.0096e-08	0.268585	0.431	0.384	0.00114985	5	---
Pop_G04G066769	1.14954e-13	0.292121	0.557	0.49	4.39194e-09	5	GRF7
Pop_G04G066776	4.28283e-24	0.330351	0.834	0.782	1.6363e-19	5	AOC3
Pop_G04G066821	1.43871e-24	0.401243	0.49	0.373	5.49673e-20	5	SAMDC
Pop_G05G008300	2.07102e-50	0.383747	0.334	0.167	7.91252e-46	5	---
Pop_G05G008518	0	1.12006	0.594	0.172	0	5	PSII-P
Pop_G05G008605	5.85165e-28	0.528477	0.298	0.183	2.23568e-23	5	---
Pop_G05G008739	3.3051e-35	0.462352	0.525	0.385	1.26275e-30	5	BZIP60
Pop_G05G008775	0	1.24876	0.566	0.105	0	5	GAPB
Pop_G05G008789	6.56631e-79	0.555264	0.444	0.224	2.50872e-74	5	NFD3
Pop_G05G017655	7.81461e-236	0.766418	0.387	0.087	2.98565e-231	5	PLDDELTA
Pop_G05G017661	7.68523e-28	0.369765	0.317	0.196	2.93622e-23	5	SEN1
Pop_G05G017726	0	0.796052	0.333	0.017	0	5	FNR1
Pop_G05G017893	1.2239e-267	0.563635	0.251	0.032	4.67603e-263	5	PSBO1
Pop_G05G057169	4.45744e-21	0.489741	0.265	0.167	1.70301e-16	5	---
Pop_G05G057185	0	1.14808	0.271	0.018	0	5	LHCB1.4
Pop_G05G057186	0	2.4493	0.834	0.21	0	5	LHCB1.4
Pop_G05G057249	6.97093e-198	0.571458	0.297	0.061	2.66331e-193	5	---
Pop_G05G057427	3.39175e-178	0.916755	0.925	0.734	1.29585e-173	5	ERD14
Pop_G05G057431	3.46469e-270	1.22903	0.629	0.23	1.32372e-265	5	PSBW
Pop_G05G057493	4.42255e-16	0.283503	0.251	0.166	1.68968e-11	5	PETE1
Pop_G05G068979	1.18965e-193	0.813684	0.308	0.066	4.54516e-189	5	EXO
Pop_G05G069941	5.26571e-49	0.419463	0.49	0.329	2.01182e-44	5	---
Pop_G06G002969	2.54155e-46	0.419082	0.354	0.199	9.71026e-42	5	GPX1
Pop_G06G003027	0	0.838728	0.347	0.029	0	5	PDE334
Pop_G06G003040	3.94828e-90	0.583457	0.277	0.094	1.50848e-85	5	---
Pop_G06G003091	1.56443e-08	0.349425	0.281	0.22	0.000597706	5	WRKY18
Pop_G06G003126	1.76266e-215	0.941645	0.433	0.123	6.73442e-211	5	PSAK
Pop_G06G003323	1.25008e-35	0.32717	0.352	0.213	4.77605e-31	5	UEV1D-4
Pop_G06G003470	7.53032e-26	0.398831	0.693	0.619	2.87703e-21	5	COPT5
Pop_G06G003521	5.38041e-08	0.346224	0.843	0.869	0.00205564	5	HSP17.6II
Pop_G06G003573	0	0.561236	0.264	0.026	0	5	GLDP1
Pop_G06G014322	2.4839e-51	0.540301	0.524	0.362	9.48999e-47	5	LSR1
Pop_G06G034872	5.3069e-11	0.30637	0.288	0.216	2.02755e-06	5	---
Pop_G06G051384	2.80701e-63	0.553658	0.674	0.529	1.07245e-58	5	---
Pop_G06G051426	1.16828e-39	0.848393	0.306	0.174	4.46353e-35	5	PAL1
Pop_G06G051485	3.46054e-38	0.416322	0.53	0.381	1.32213e-33	5	TIFY10A
Pop_G06G051489	2.26667e-30	0.387612	0.305	0.179	8.66003e-26	5	---
Pop_G06G051492	9.22474e-17	0.285663	0.481	0.37	3.52441e-12	5	---
Pop_G06G051494	3.54394e-33	0.47621	0.551	0.437	1.354e-28	5	CPN21
Pop_G06G051549	8.5564e-19	0.342081	0.309	0.21	3.26906e-14	5	---
Pop_G06G051550	4.31905e-38	0.45459	0.288	0.152	1.65014e-33	5	CML42
Pop_G06G051755	4.1853e-08	0.409692	0.353	0.292	0.00159904	5	---
Pop_G06G051829	3.87231e-128	0.714457	0.259	0.065	1.47945e-123	5	TIP1;1
Pop_G06G053886	4.66257e-27	0.287535	0.301	0.181	1.78138e-22	5	RBCL
Pop_G06G075893	3.07404e-56	0.472955	0.33	0.161	1.17447e-51	5	FUGU5
Pop_G06G075925	1.10106e-14	0.350649	0.372	0.295	4.20673e-10	5	---
Pop_G06G076020	6.87888e-28	0.453609	0.467	0.338	2.62815e-23	5	---
Pop_G06G082078	6.93518e-64	0.463614	0.89	0.807	2.64965e-59	5	---
Pop_G07G031789	1.10983e-25	0.392023	0.51	0.395	4.24021e-21	5	---
Pop_G07G061269	1.72638e-48	0.367705	0.295	0.147	6.59579e-44	5	FKP12
Pop_G07G061302	1.34724e-28	0.344369	0.262	0.151	5.14726e-24	5	---
Pop_G07G062647	1.96002e-07	0.269685	0.556	0.512	0.00748845	5	---
Pop_G07G062705	0	0.79877	0.346	0.045	0	5	PSBO1
Pop_G08G021787	1.9969e-08	0.321562	0.377	0.324	0.000762936	5	---
Pop_G08G046460	1.86169e-86	0.536336	0.352	0.148	7.11278e-82	5	TIFY6B
Pop_G08G057600	1.26293e-15	0.336064	0.389	0.297	4.82516e-11	5	PIP2A
Pop_G08G057606	1.60673e-23	0.356177	0.464	0.355	6.13866e-19	5	VMA10
Pop_G08G057746	1.11161e-20	0.307967	0.283	0.184	4.24701e-16	5	ATADF4
Pop_G08G057759	1.7612e-57	0.38623	0.335	0.163	6.72885e-53	5	UBC7
Pop_G08G057820	0	0.783142	0.315	0.024	0	5	RCA
Pop_G08G057869	8.68643e-28	0.524918	0.758	0.698	3.31874e-23	5	---
Pop_G08G057924	2.24686e-35	0.412842	0.34	0.204	8.58435e-31	5	LHCB4.3
Pop_G08G057949	4.78799e-36	0.433561	0.501	0.355	1.8293e-31	5	ZFAR1
Pop_G08G058430	3.35047e-17	0.278438	0.405	0.312	1.28008e-12	5	---
Pop_G08G058521	2.80441e-17	0.546557	0.644	0.616	1.07145e-12	5	---
Pop_G08G058532	2.15206e-20	0.279633	0.335	0.225	8.22216e-16	5	RPI2
Pop_G08G063522	1.88293e-15	0.257943	0.377	0.283	7.19394e-11	5	---
Pop_G08G082201	0	0.920998	0.474	0.109	0	5	GS2
Pop_G08G082208	1.63787e-08	0.25274	0.426	0.37	0.000625765	5	---
Pop_G08G083333	1.7137e-28	0.378347	0.48	0.358	6.54737e-24	5	TCTP
Pop_G08G087151	4.57567e-60	0.600036	0.328	0.157	1.74818e-55	5	ATAILP1
Pop_G09G014141	1.0303e-06	0.293193	0.545	0.511	0.0393636	5	ZAT12
Pop_G09G015100	2.8794e-48	0.403154	0.321	0.163	1.1001e-43	5	TUA4
Pop_G09G022409	0	1.05395	0.442	0.067	0	5	PSAO
Pop_G09G022429	3.67411e-176	0.954111	0.44	0.143	1.40373e-171	5	---
Pop_G09G027782	1.79745e-104	0.517887	0.316	0.11	6.86732e-100	5	ISPG
Pop_G09G027832	2.84787e-79	0.562529	0.59	0.375	1.08806e-74	5	---
Pop_G09G030265	1.60155e-77	0.344158	0.261	0.09	6.1189e-73	5	SIMIP
Pop_G09G031670	7.47402e-25	0.29792	0.254	0.15	2.85552e-20	5	---
Pop_G09G031716	2.98585e-26	0.351027	0.523	0.408	1.14077e-21	5	AAC2
Pop_G09G031750	2.92437e-87	0.390607	0.262	0.09	1.11729e-82	5	---
Pop_G09G031997	4.1075e-37	0.427593	0.45	0.298	1.56931e-32	5	PSAA
Pop_G09G031998	4.86898e-31	0.43674	0.396	0.262	1.86024e-26	5	PSAB
Pop_G09G032001	2.71912e-49	0.562332	0.704	0.573	1.03887e-44	5	PSBC
Pop_G09G032002	2.70548e-40	0.438945	0.363	0.21	1.03366e-35	5	PSBD
Pop_G09G032003	2.31229e-50	0.441878	0.443	0.266	8.83432e-46	5	RPOB
Pop_G09G032004	1.86951e-84	0.630442	0.819	0.718	7.14266e-80	5	RPS2
Pop_G09G032005	4.20193e-54	0.42469	0.75	0.658	1.60539e-49	5	RPS2
Pop_G09G032006	2.99652e-68	0.547961	0.545	0.34	1.14485e-63	5	ATPI
Pop_G09G051056	1.84339e-176	0.715014	0.27	0.055	7.04287e-172	5	EXPL2
Pop_G09G077184	0	1.16335	0.479	0.044	0	5	FBA2
Pop_G09G077190	4.98995e-23	0.347374	0.4	0.292	1.90646e-18	5	ISPH
Pop_G09G077266	4.64772e-25	0.3605	0.452	0.332	1.77571e-20	5	RBP47B
Pop_G09G077300	3.53838e-102	0.712503	0.301	0.1	1.35187e-97	5	RRTF1
Pop_G09G077549	5.90229e-49	0.392439	0.322	0.166	2.25503e-44	5	MSRB2
Pop_G09G077551	2.31357e-35	0.576792	0.335	0.204	8.83923e-31	5	HEMA1
Pop_G09G077642	6.07895e-46	0.315245	0.265	0.124	2.32252e-41	5	CIB22
Pop_G10G000173	3.35728e-133	0.566582	0.368	0.125	1.28268e-128	5	TIFY6B
Pop_G10G001634	3.35646e-34	0.418663	0.31	0.176	1.28237e-29	5	---
Pop_G10G001635	1.80705e-62	0.391342	0.273	0.115	6.904e-58	5	PSAD-2
Pop_G10G006173	6.72741e-176	1.03824	0.609	0.284	2.57028e-171	5	ATX1
Pop_G10G006222	3.33124e-17	0.259864	0.373	0.278	1.27273e-12	5	---
Pop_G10G006247	2.75128e-46	0.352501	0.272	0.129	1.05115e-41	5	ATACA9
Pop_G10G007060	4.02064e-37	0.362754	0.46	0.313	1.53613e-32	5	RABE1c
Pop_G10G007156	0	1.16302	0.443	0.054	0	5	RCA
Pop_G10G007162	5.83169e-141	0.399427	0.285	0.075	2.22806e-136	5	---
Pop_G10G007735	1.03812e-42	0.626211	0.486	0.326	3.96626e-38	5	PIP2A
Pop_G10G007777	0	1.22574	0.499	0.102	0	5	LHCA1
Pop_G10G022958	1.37487e-241	0.868971	0.96	0.854	5.25282e-237	5	TCTP
Pop_G10G023141	9.19991e-171	0.494534	0.268	0.058	3.51492e-166	5	EMB3105
Pop_G10G047893	2.68271e-207	0.910045	0.793	0.417	1.02496e-202	5	NRP1
Pop_G10G047975	2.52833e-13	0.253092	0.941	0.945	9.65974e-09	5	---
Pop_G10G047985	4.37845e-41	0.449882	0.386	0.23	1.67283e-36	5	HS1
Pop_G10G047986	7.2276e-156	0.877158	0.356	0.104	2.76138e-151	5	HS1
Pop_G10G047989	2.09211e-147	1.00384	0.344	0.105	7.99313e-143	5	HS1
Pop_G10G064572	0	0.85814	0.408	0.07	0	5	GS2
Pop_G10G064605	4.8551e-54	0.379783	0.308	0.148	1.85494e-49	5	---
Pop_G10G064616	5.23842e-29	0.380898	0.416	0.289	2.00139e-24	5	HSBP
Pop_G10G064667	4.71902e-141	0.474409	0.306	0.086	1.80295e-136	5	CYN
Pop_G10G064706	8.03549e-19	0.293435	0.263	0.17	3.07004e-14	5	IIL1
Pop_G11G070054	3.04713e-177	0.836335	0.44	0.148	1.16419e-172	5	GSTU19
Pop_G11G070393	3.80384e-25	0.327707	0.717	0.647	1.4533e-20	5	---
Pop_G11G077706	4.07713e-190	0.78037	0.422	0.128	1.55771e-185	5	---
Pop_G11G077813	9.027e-19	0.312208	0.474	0.383	3.44886e-14	5	---
Pop_G12G035109	5.03781e-56	0.546583	0.565	0.368	1.92474e-51	5	---
Pop_G12G050818	2.0025e-43	0.476706	0.265	0.129	7.65073e-39	5	HSR3
Pop_G13G034736	0	1.06644	0.515	0.082	0	5	SSR16
Pop_G13G070834	2.01645e-91	0.366662	0.27	0.089	7.70406e-87	5	---
Pop_G13G070856	1.37711e-30	0.362879	0.391	0.256	5.26137e-26	5	RSU2
Pop_G13G070992	2.86613e-15	0.330278	0.469	0.385	1.09503e-10	5	SRC2
Pop_G13G071034	1.48021e-11	0.254132	0.477	0.409	5.65529e-07	5	IAA16
Pop_G13G071543	1.73647e-63	0.425317	0.271	0.114	6.63437e-59	5	---
Pop_G14G000524	1.26597e-186	0.73292	0.539	0.199	4.83676e-182	5	POM1
Pop_G14G023690	7.17701e-168	0.639123	0.331	0.085	2.74205e-163	5	---
Pop_G14G044088	1.4545e-16	0.27775	0.301	0.205	5.55705e-12	5	ZAT10
[truncated: 1,675 more rows]

## Sheet: Table S4
Table S4: Marker genes list of functional leaves cell-clusters 0 to 9. (logFC.threshold > 0.25; min.pct > 0.25 )
[truncated: 4,268 more rows]

[truncated: 25 more sheets: Table S5, Table S6, Table S7, Table S8, Table S9, Table S10, Table S11, Table S12, Table S13, Table S14, Table S15, Table S16, Table S17, Table S18, Table S19, Table S20, Table S21, Table S22, Table S23, Table S24 …]
