# Supplementary material
Source: MDPI journal article supplement (https://www.mdpi.com/1999-4907/15/3/512)

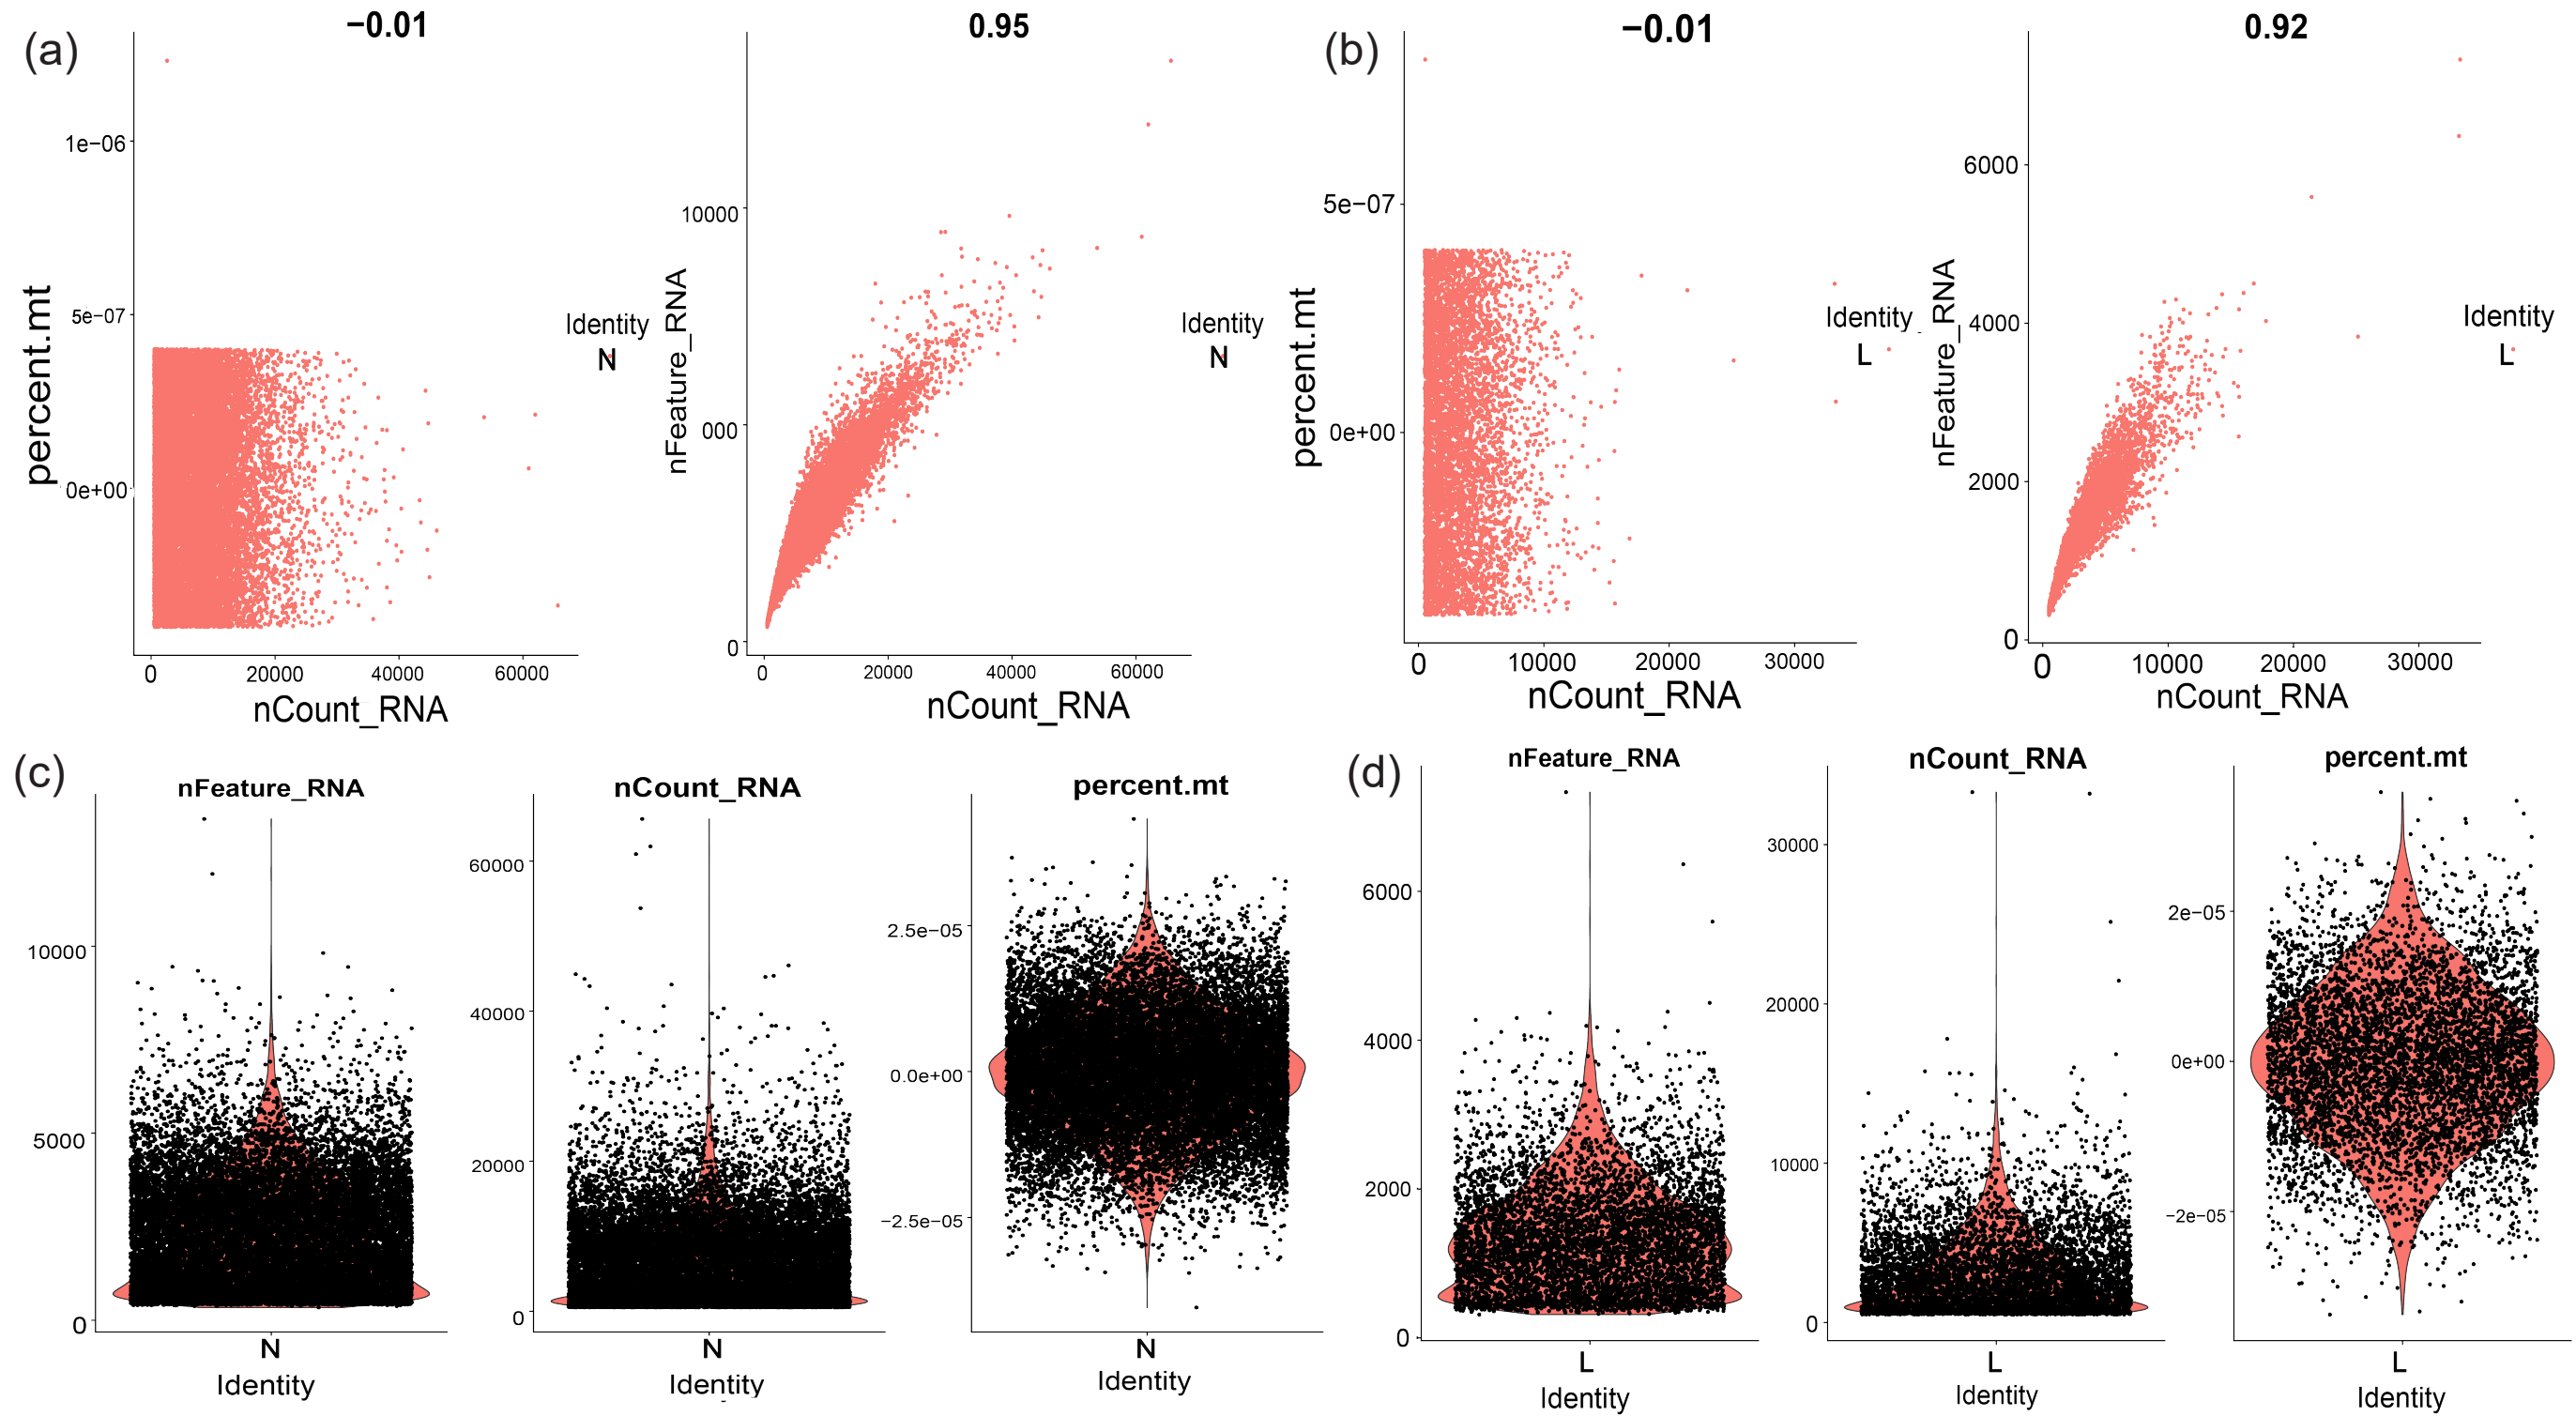

Supplement: s1 [file s1 › Figure S1.pdf]

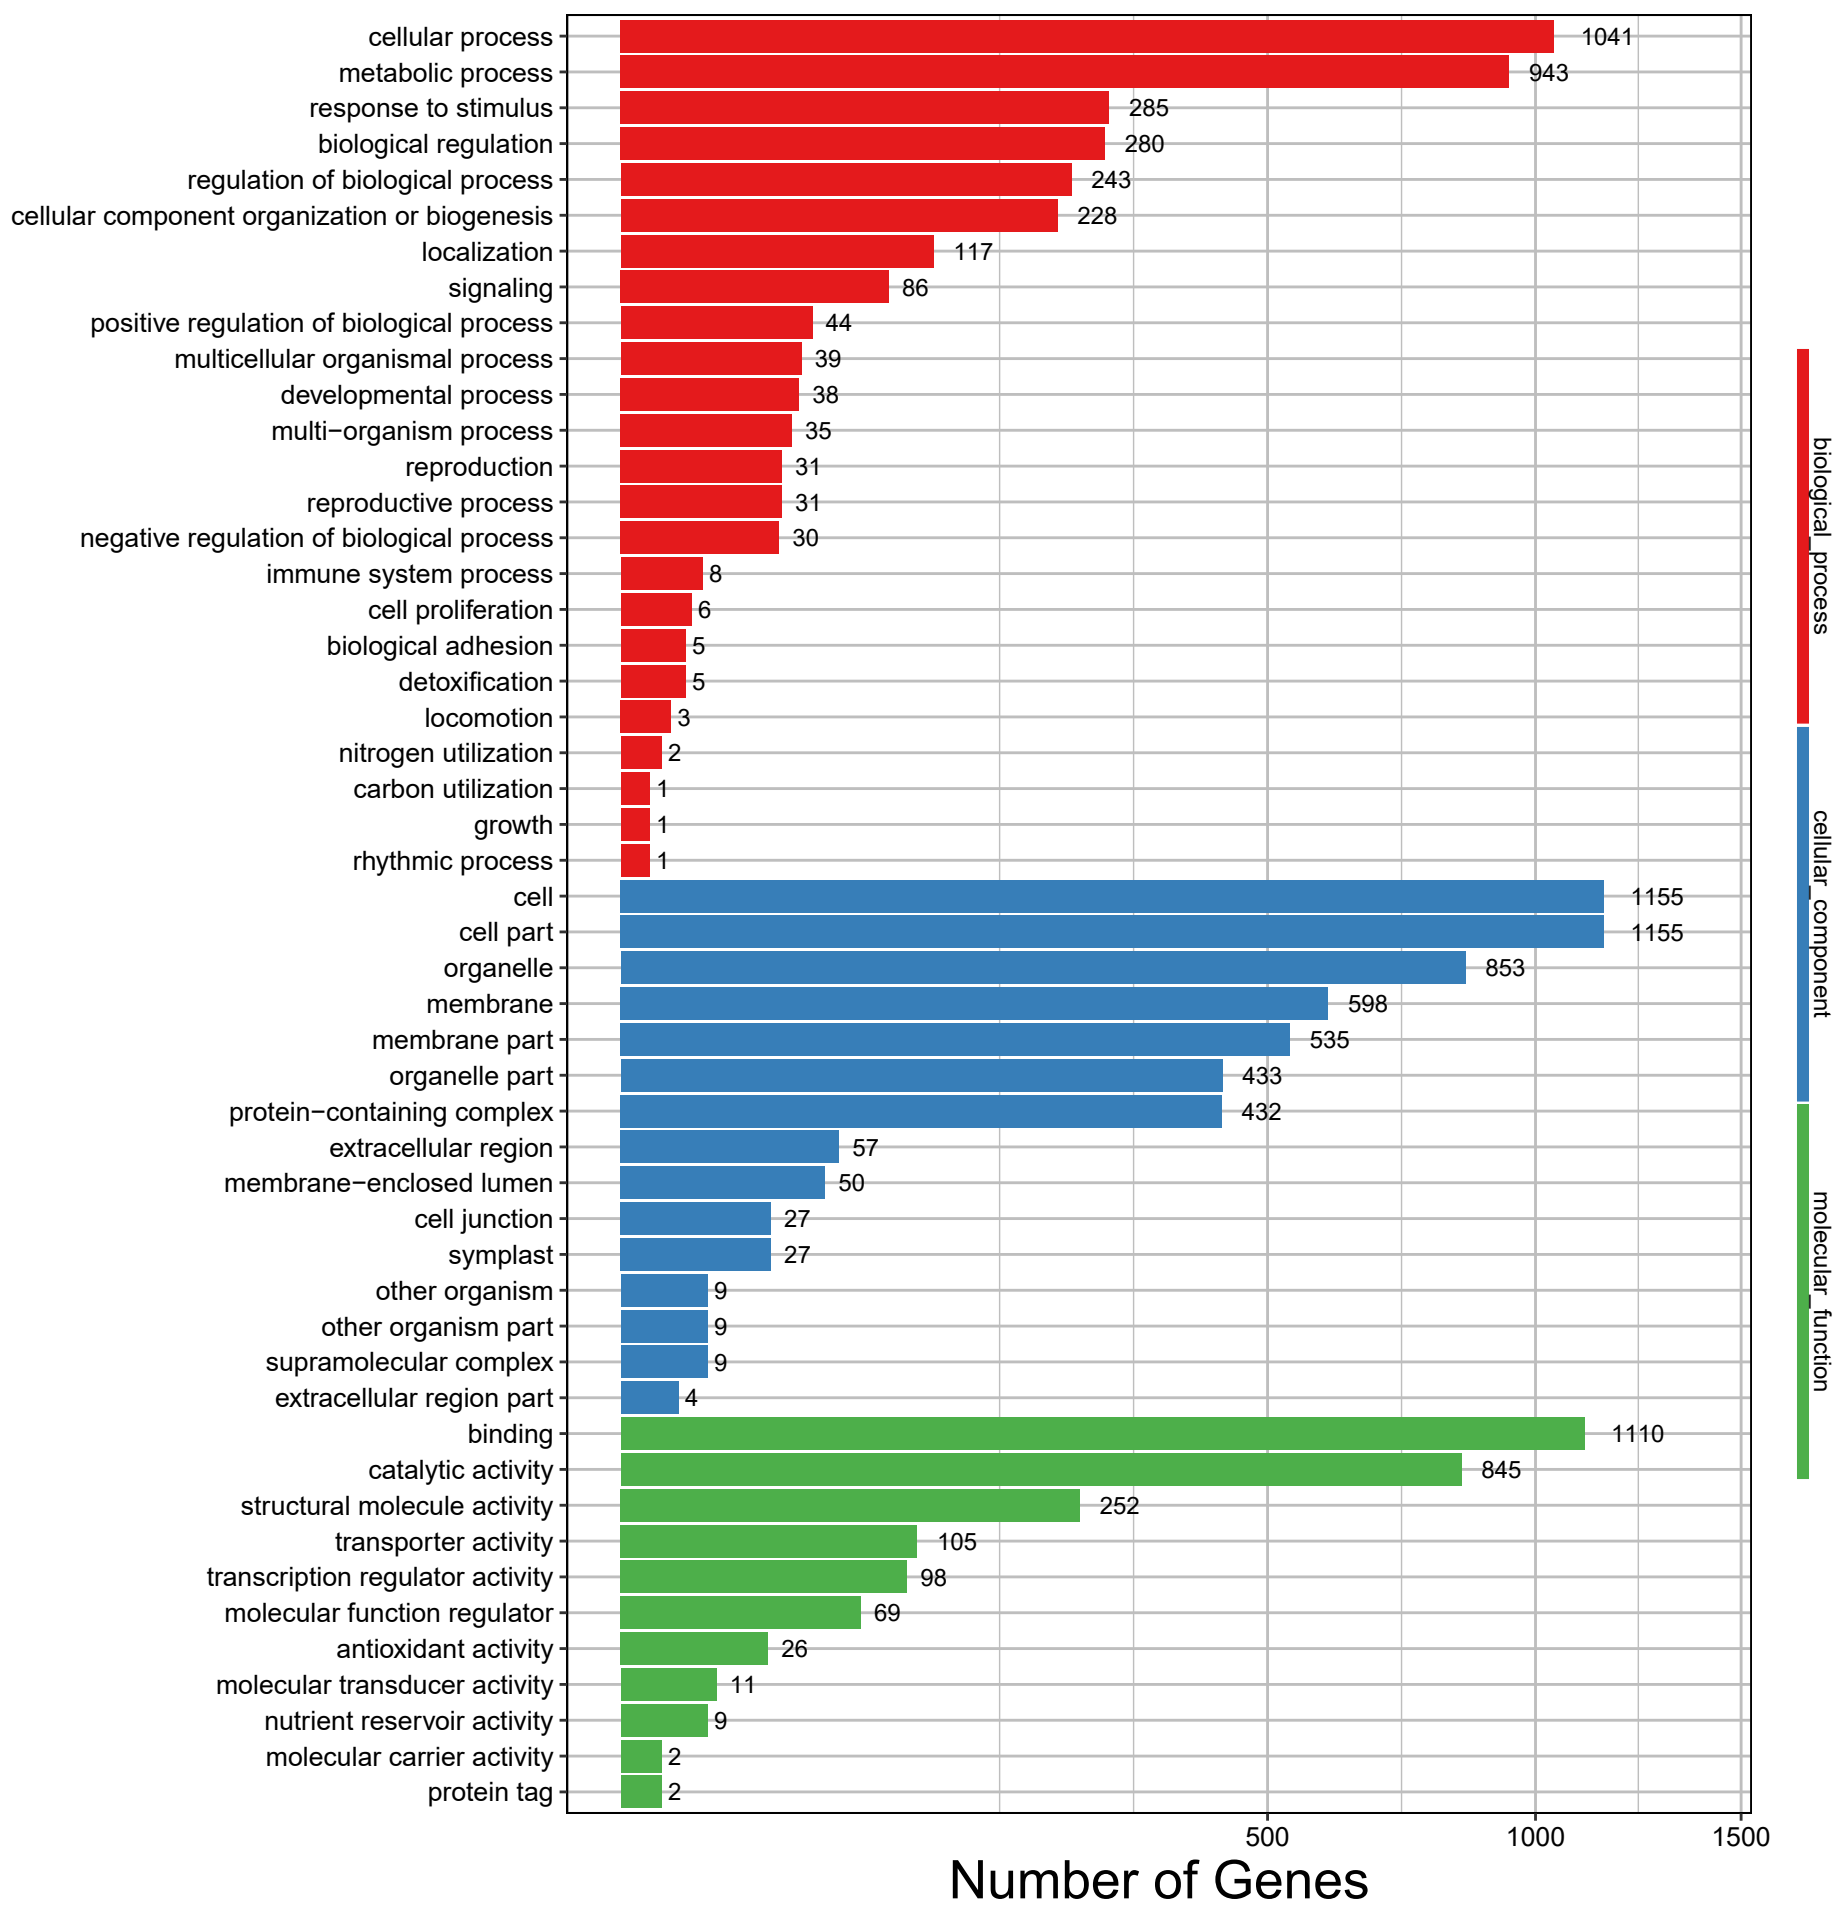

Supplement: s1 [file s1 › Figure S2.pdf]

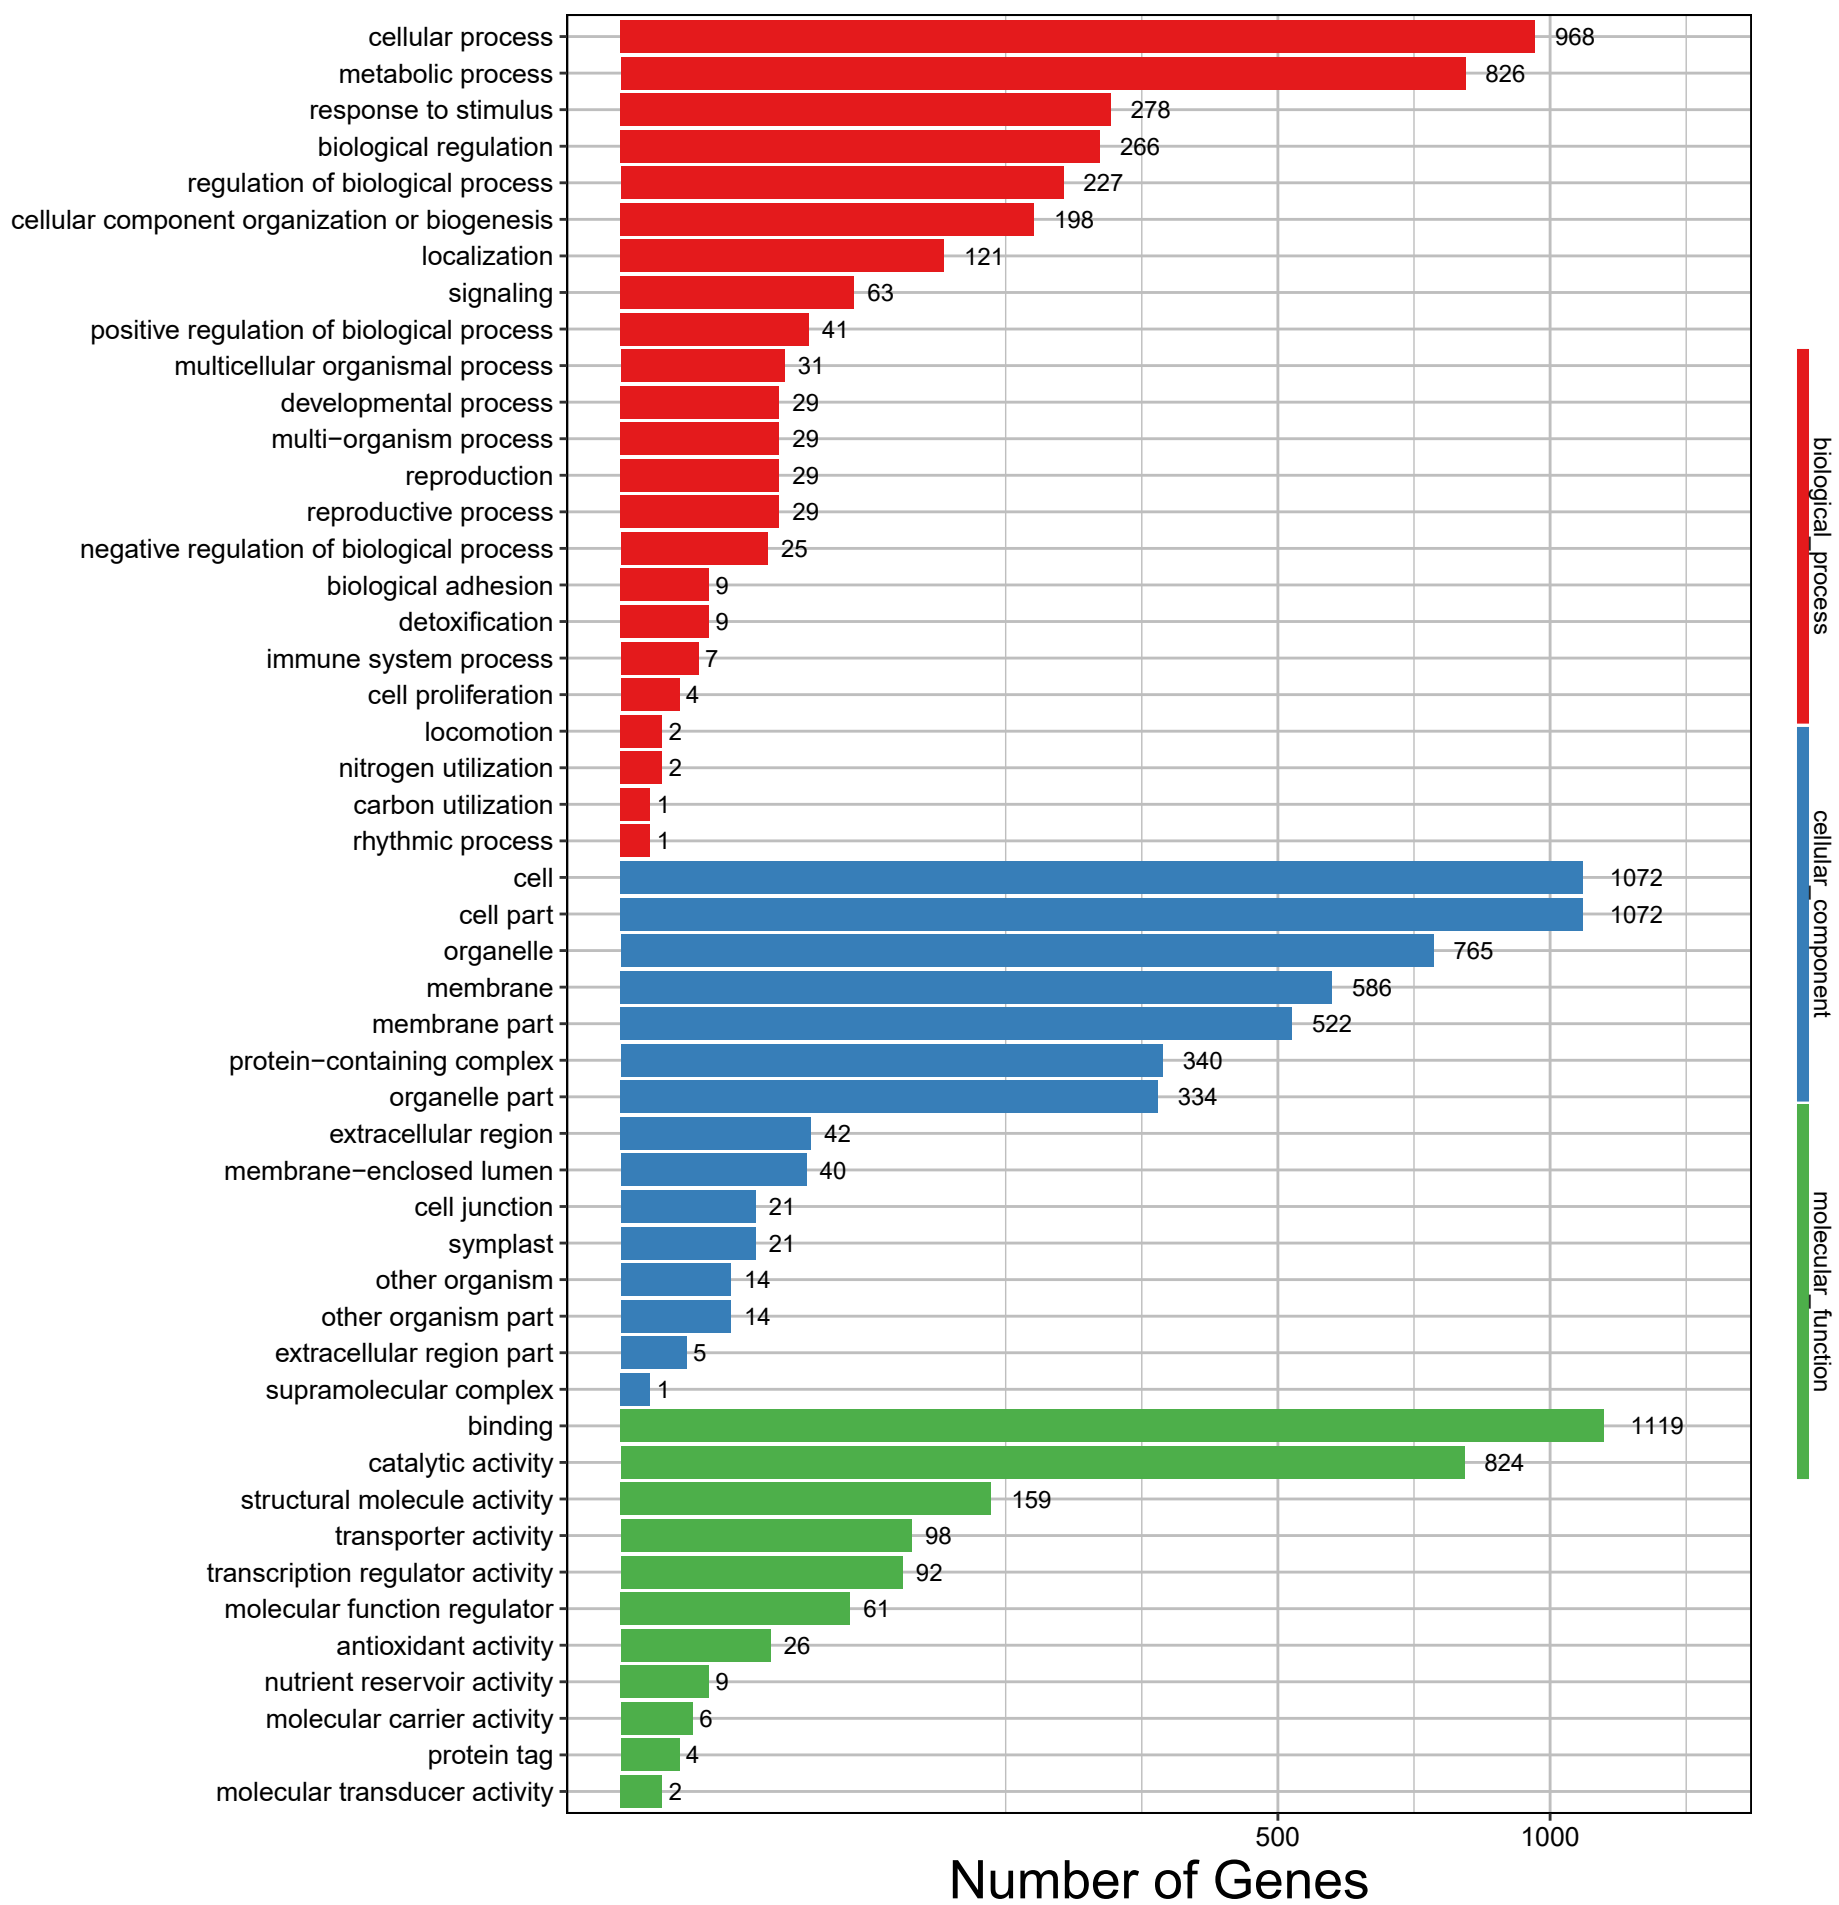

Supplement: s1 [file s1 › Figure S3.pdf]

# Enriched KEGG Pathway

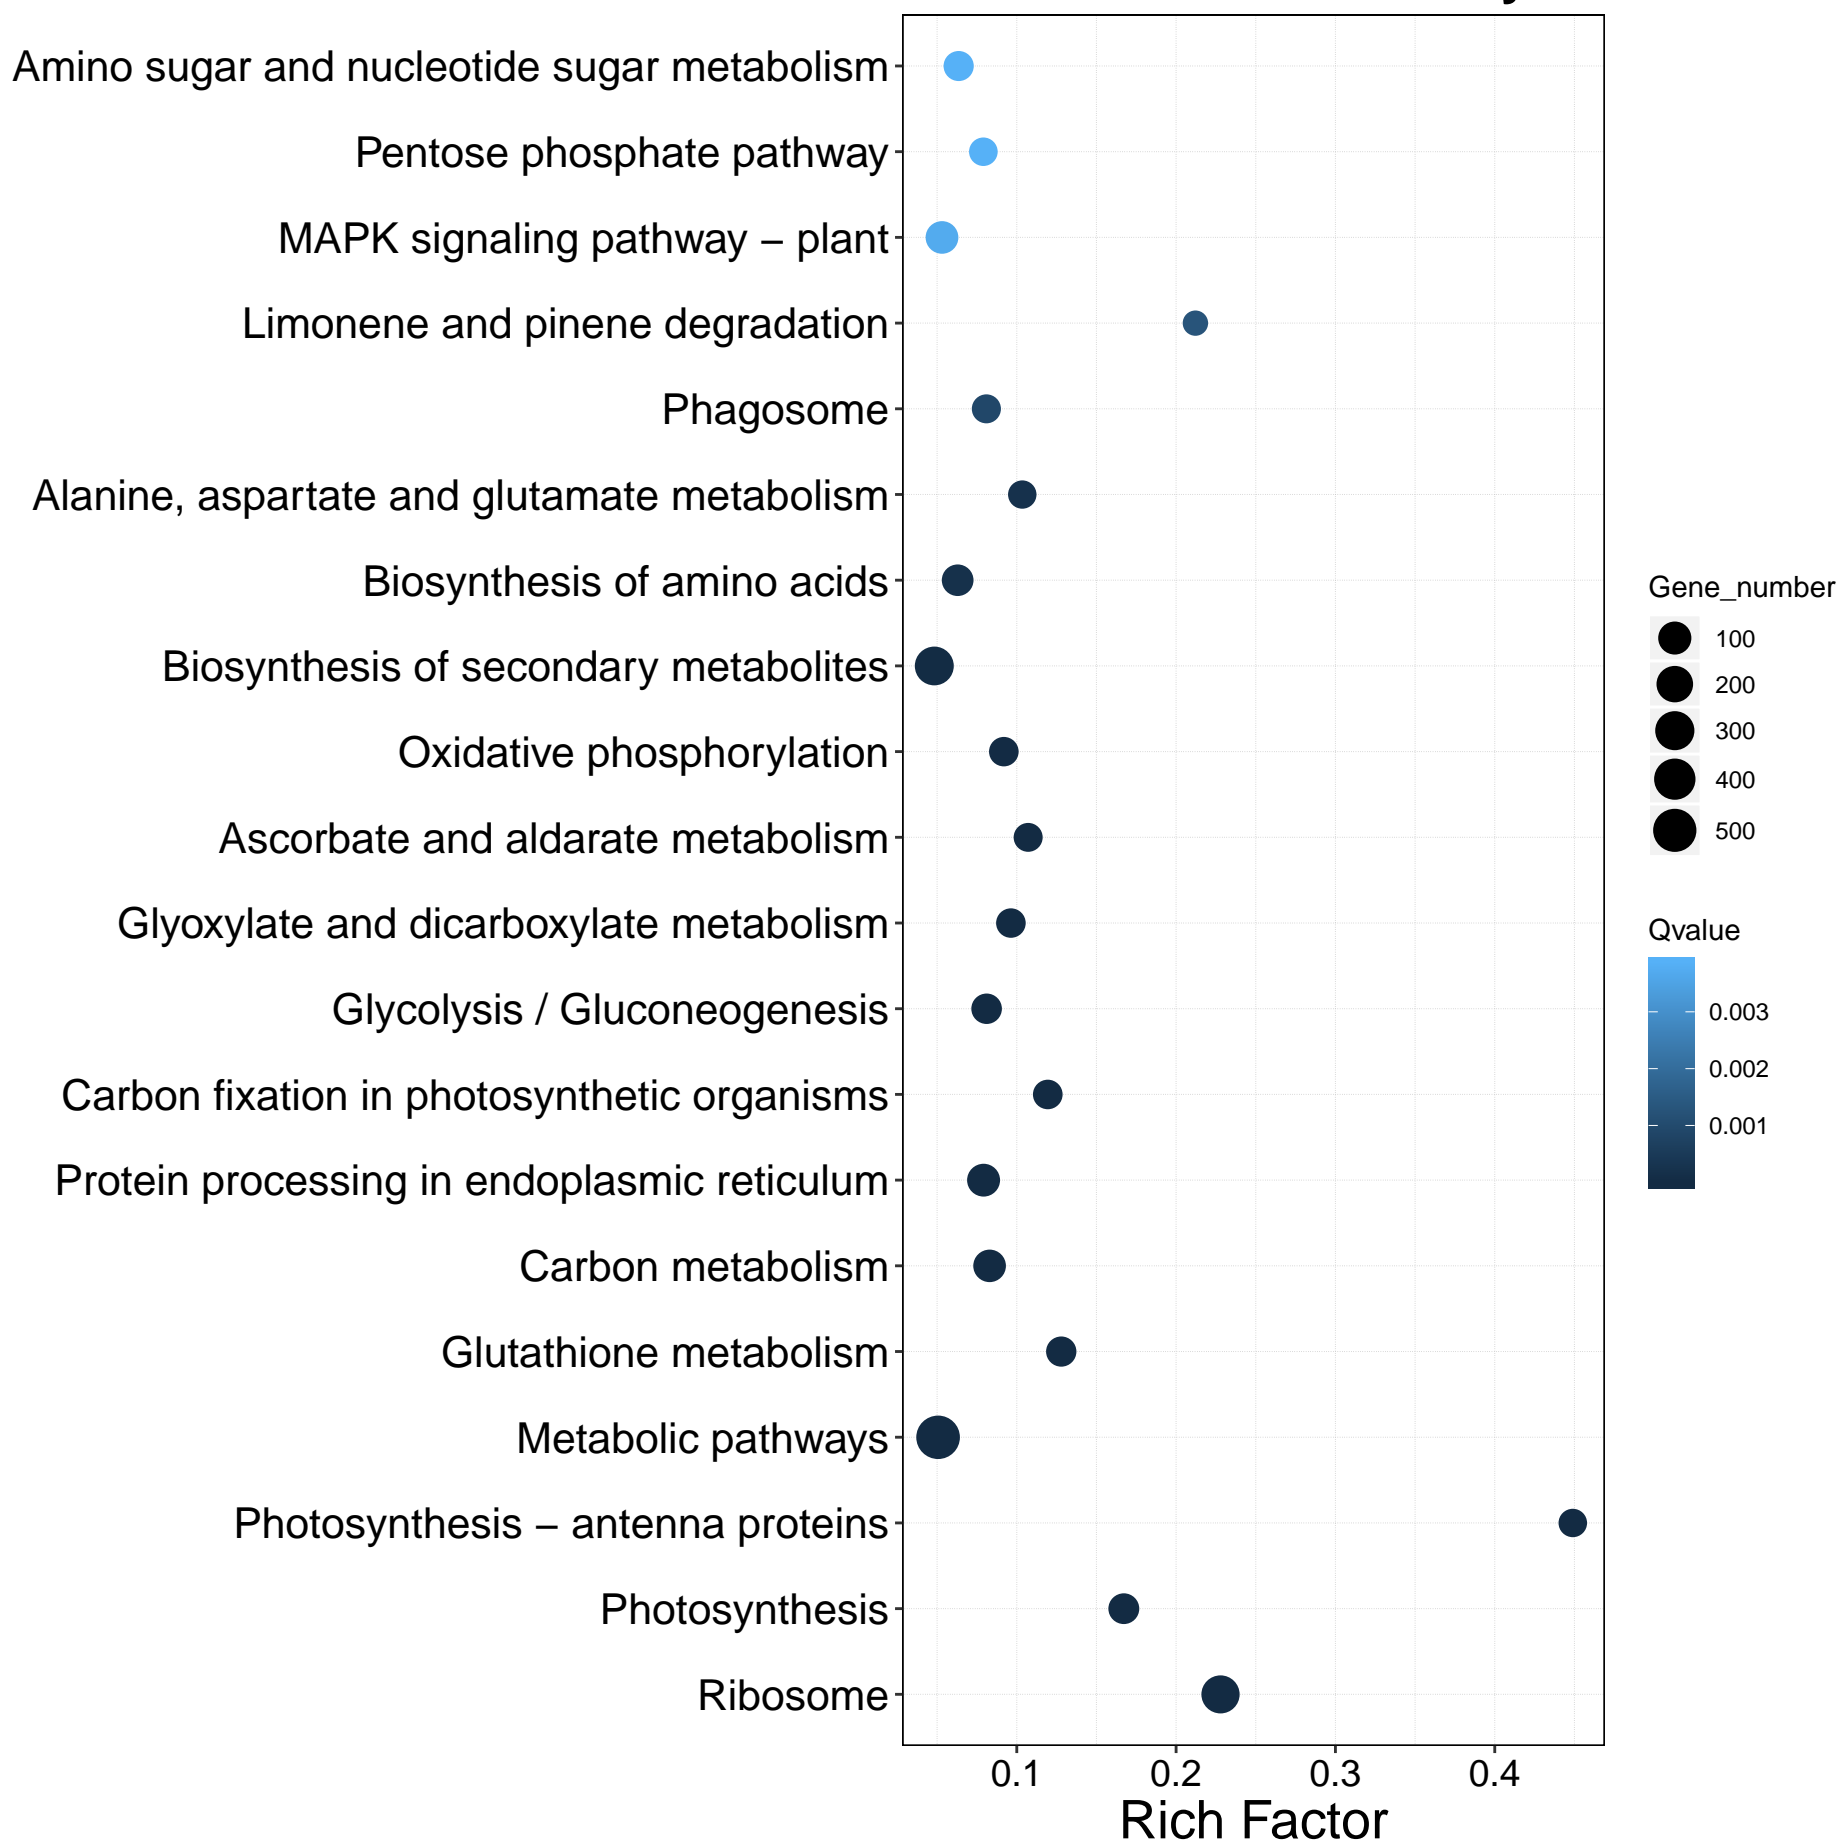

Supplement: s1 [file s1 › Figure S4.pdf]

# Enriched KEGG Pathway

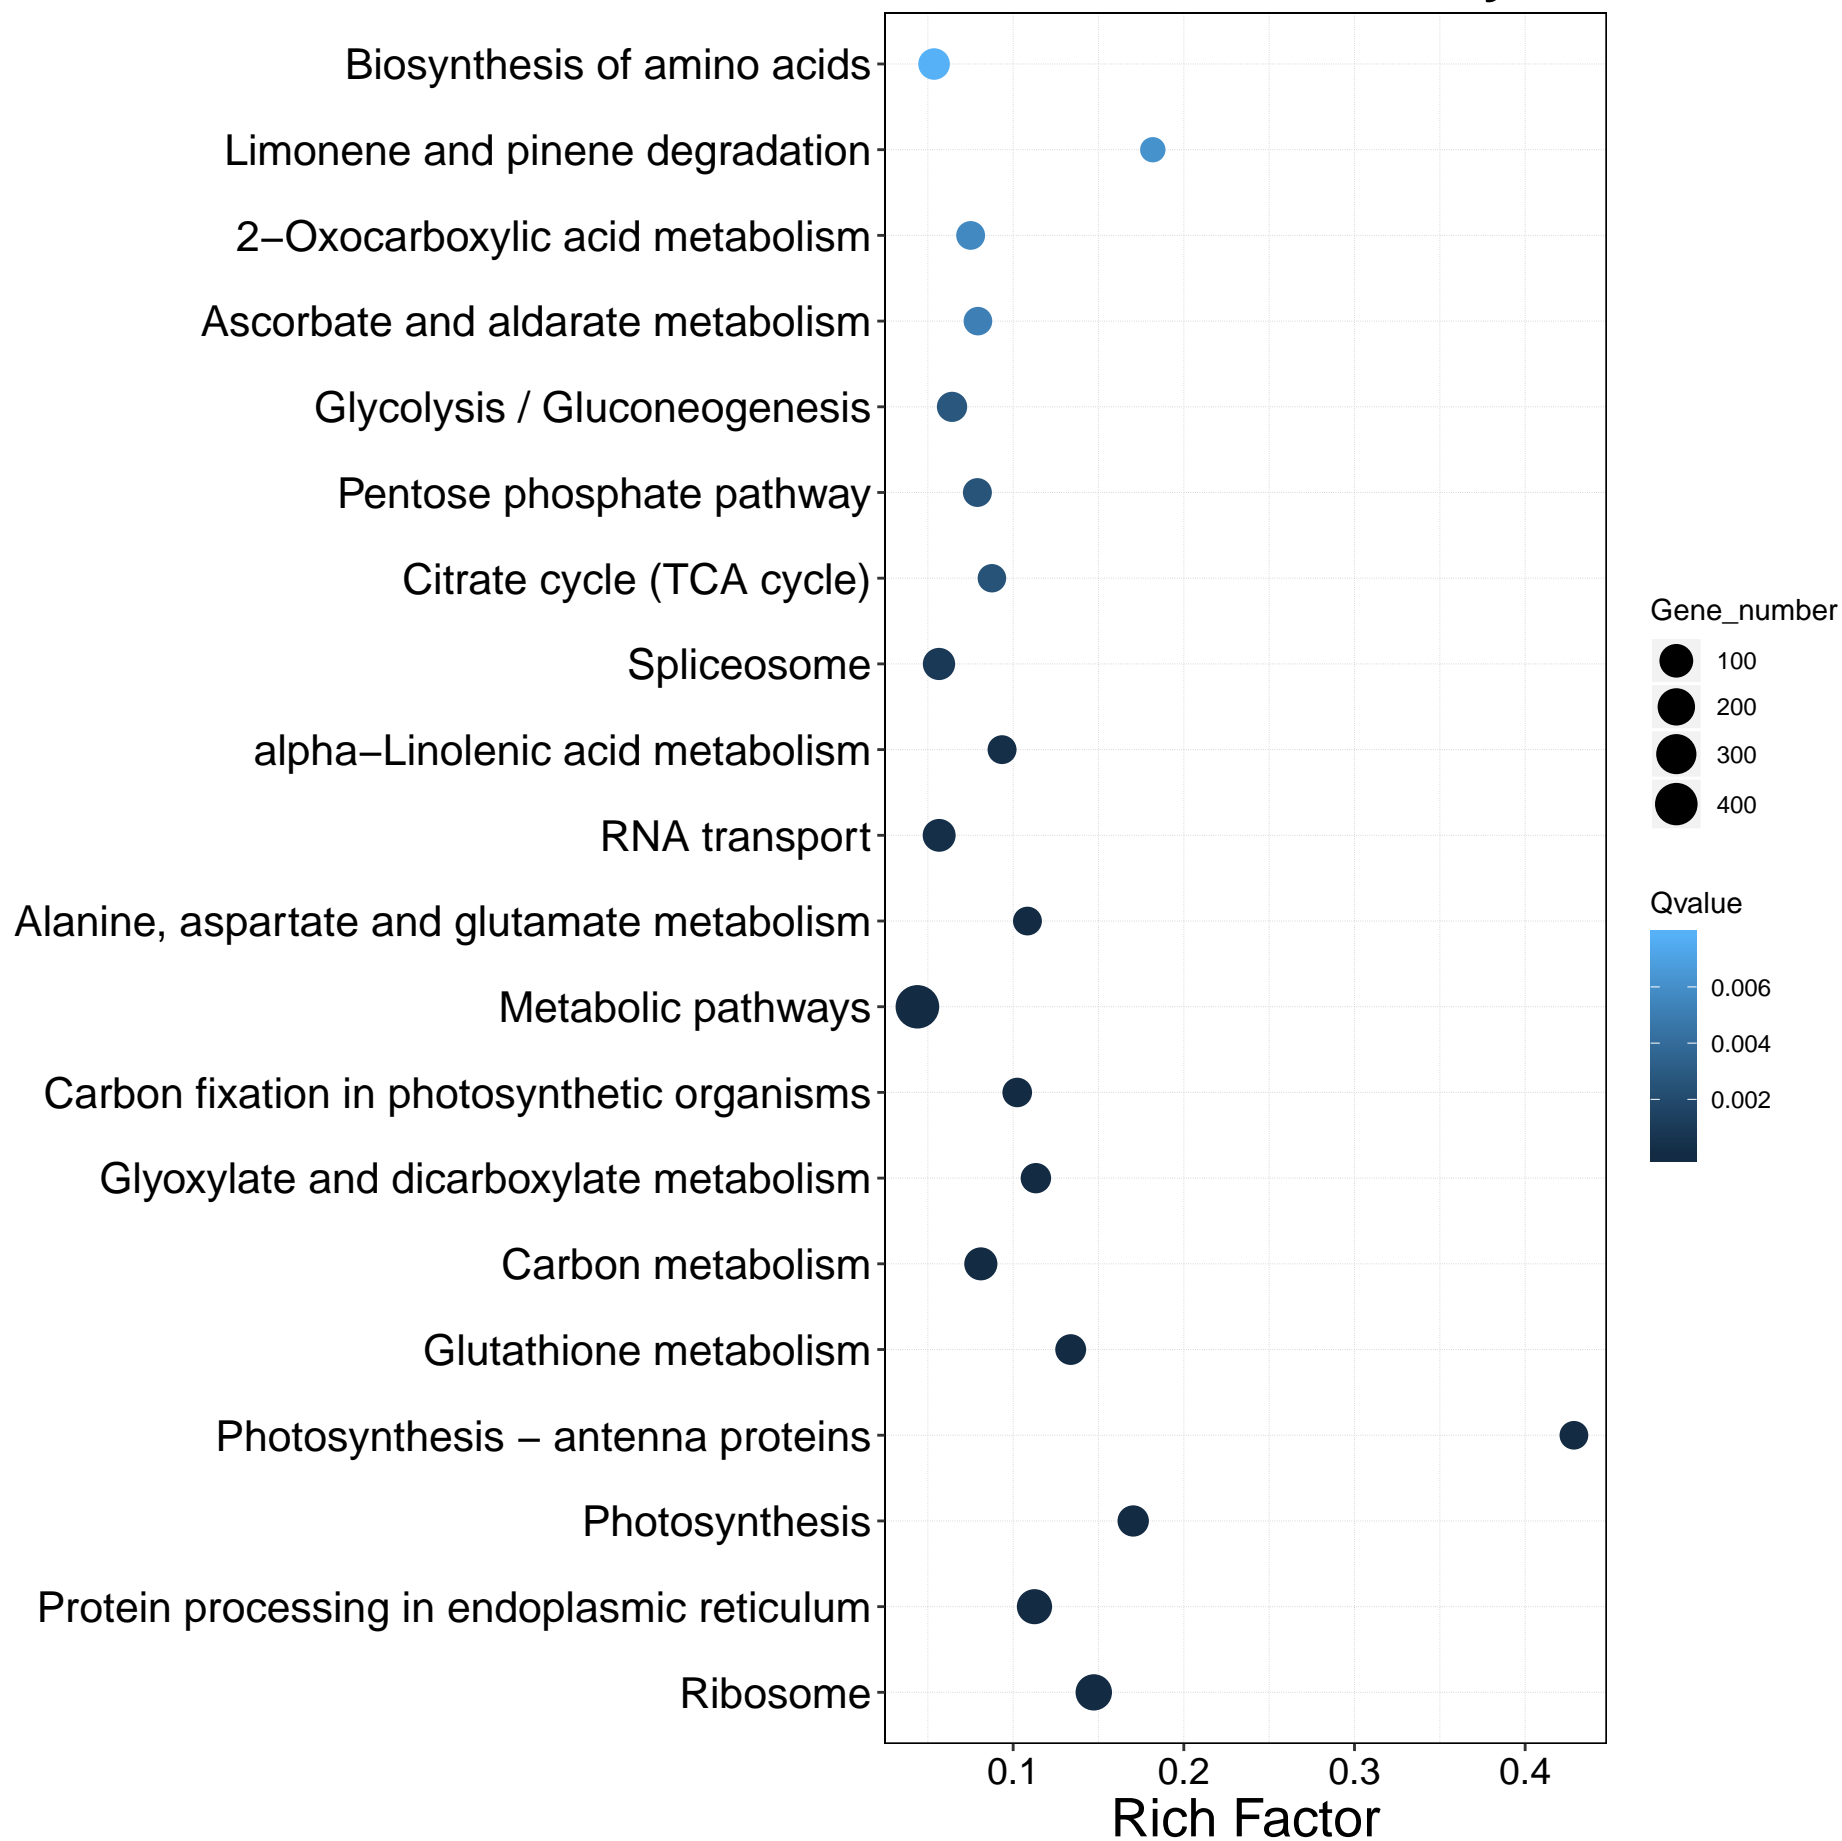

Supplement: s1 [file s1 › Figure S5.pdf]

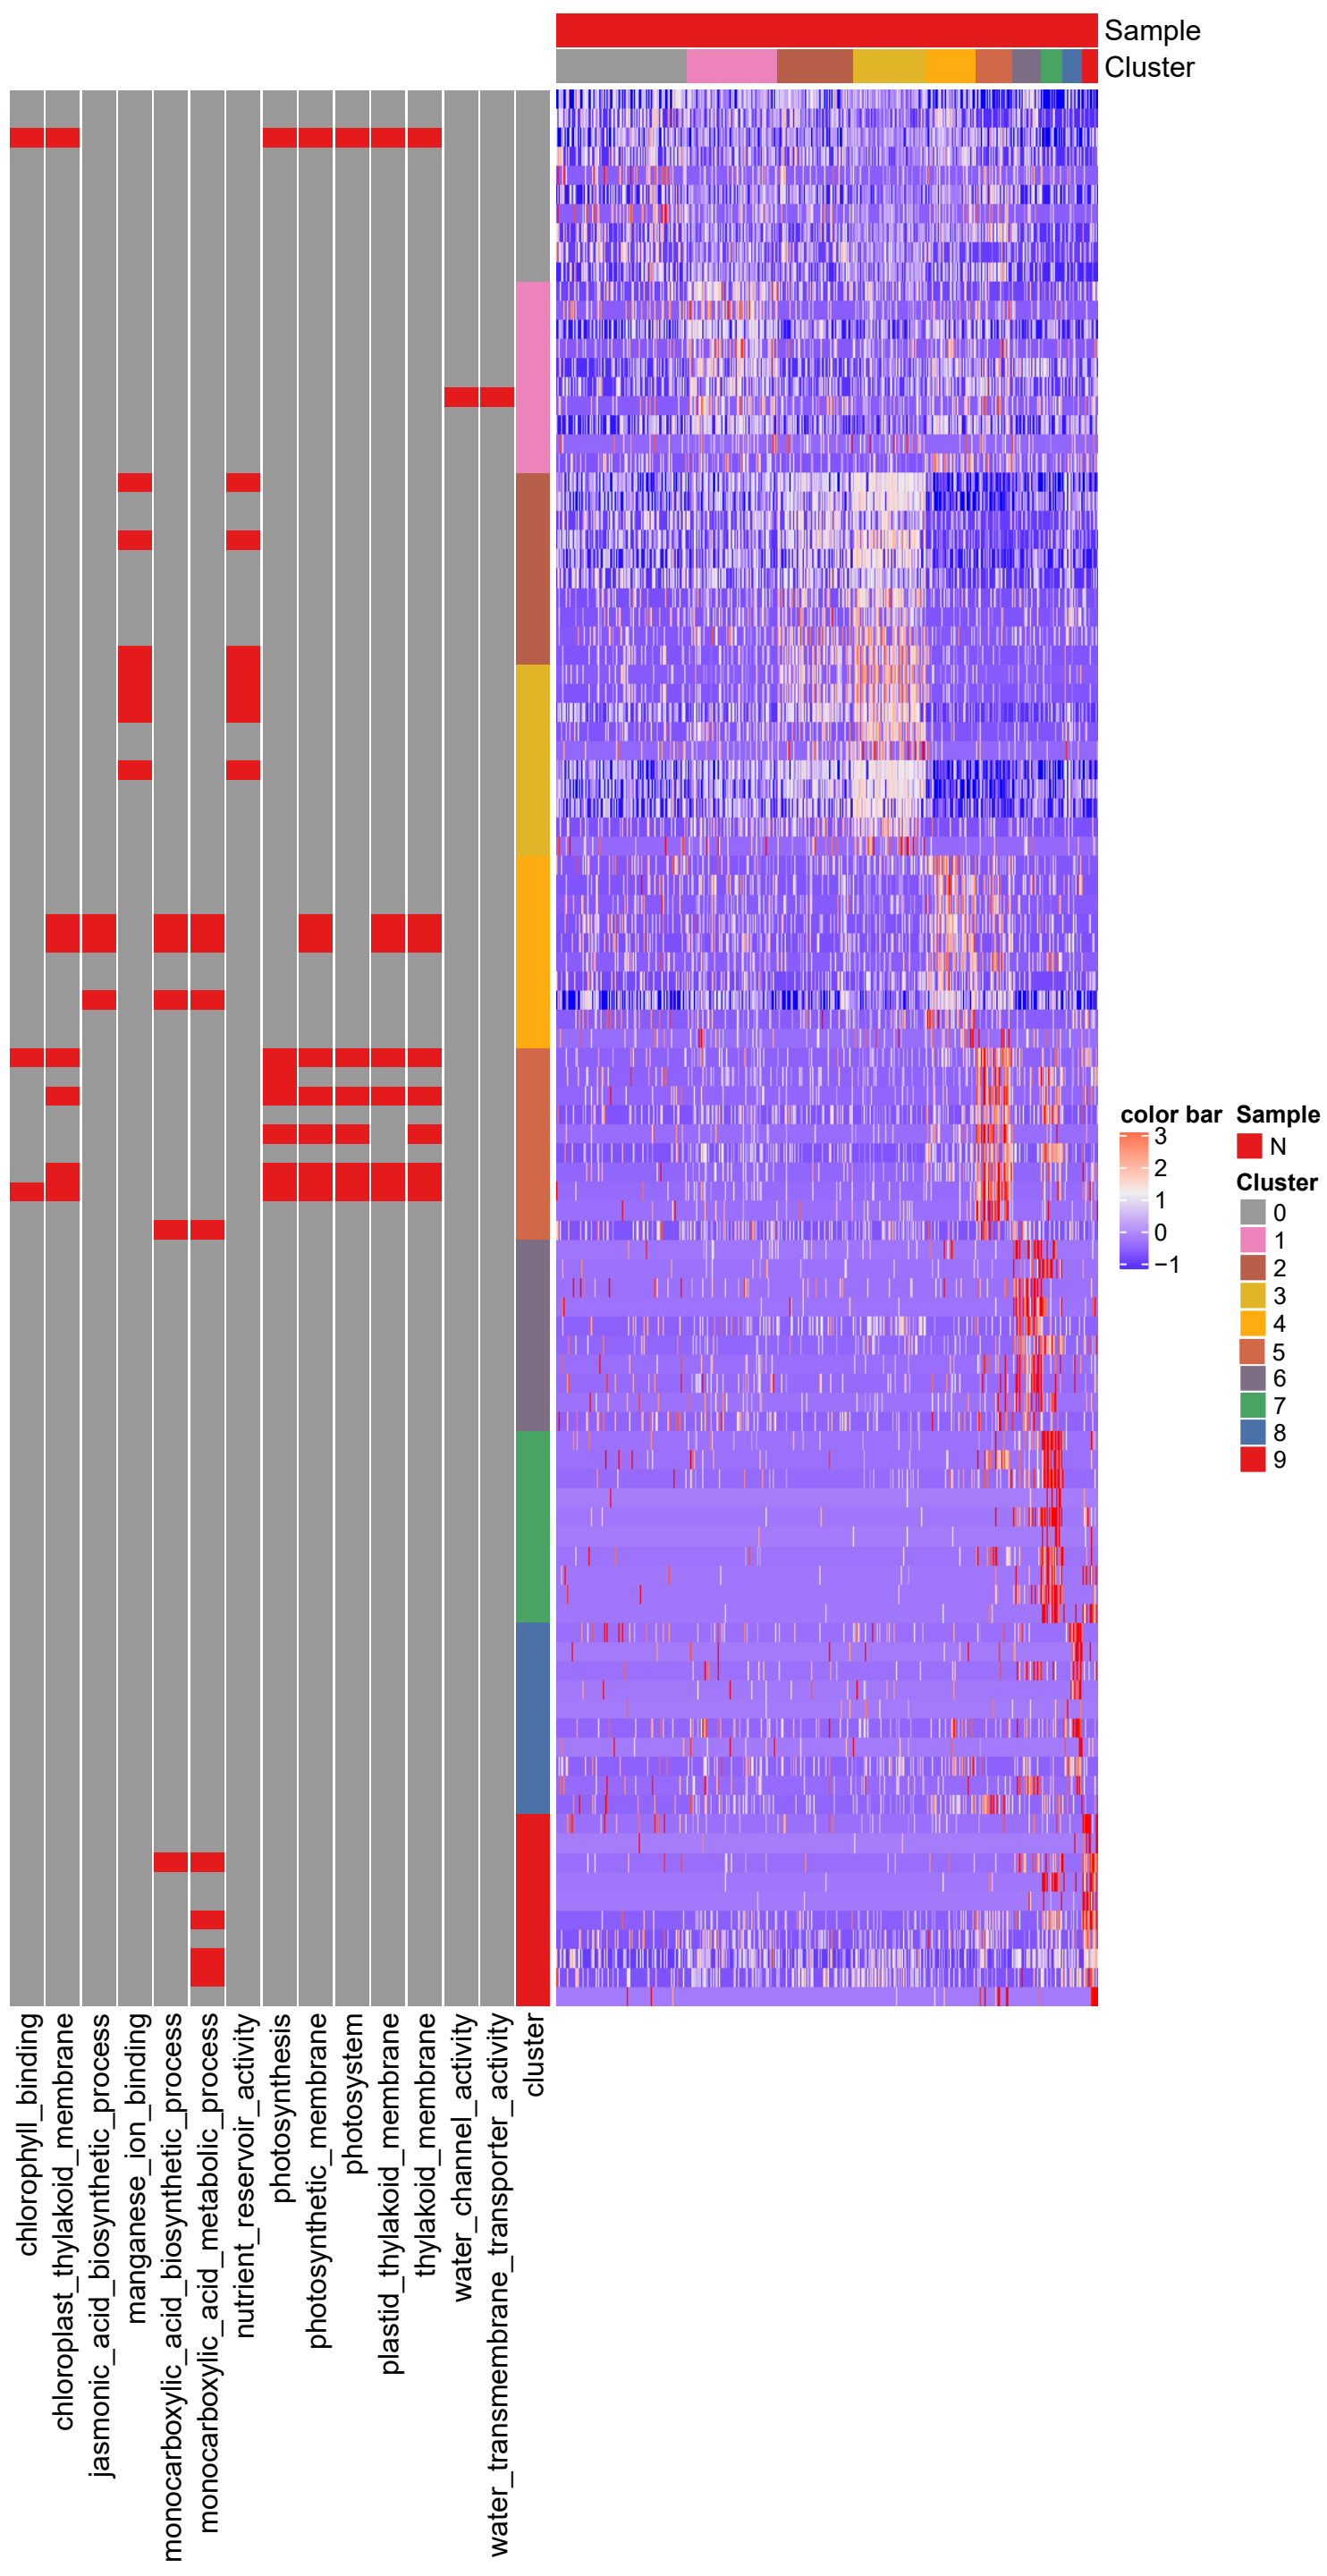

Supplement: s1 [file s1 › Figure S6.pdf]

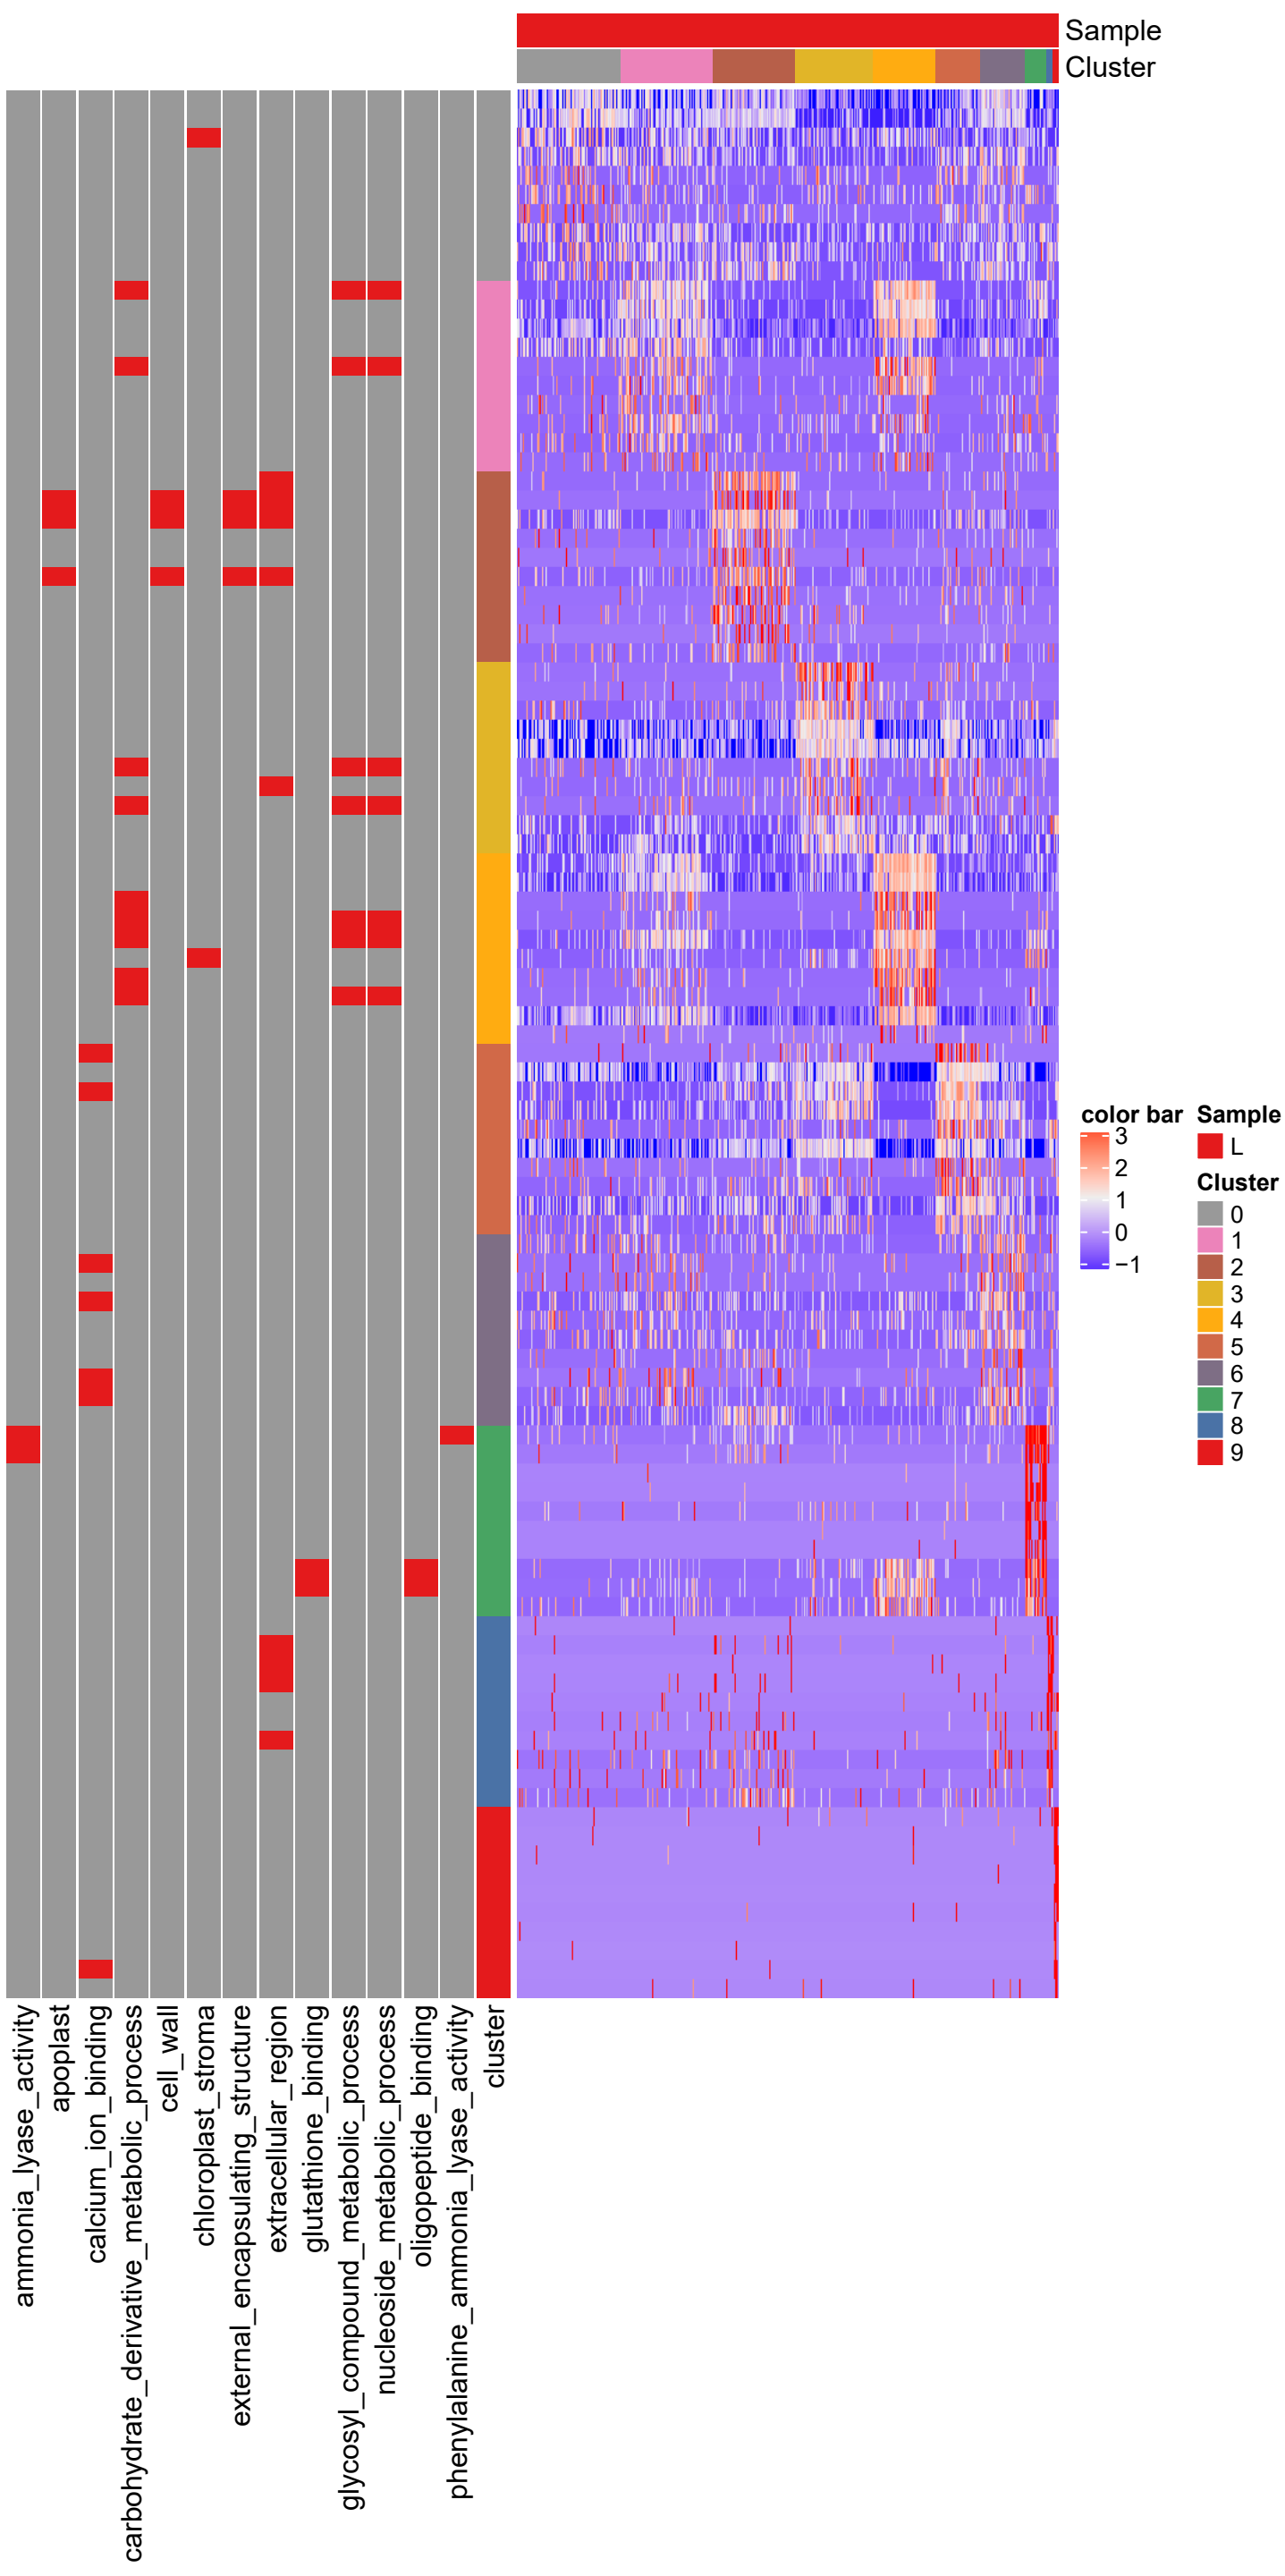

Supplement: s1 [file s1 › Figure S7.pdf]

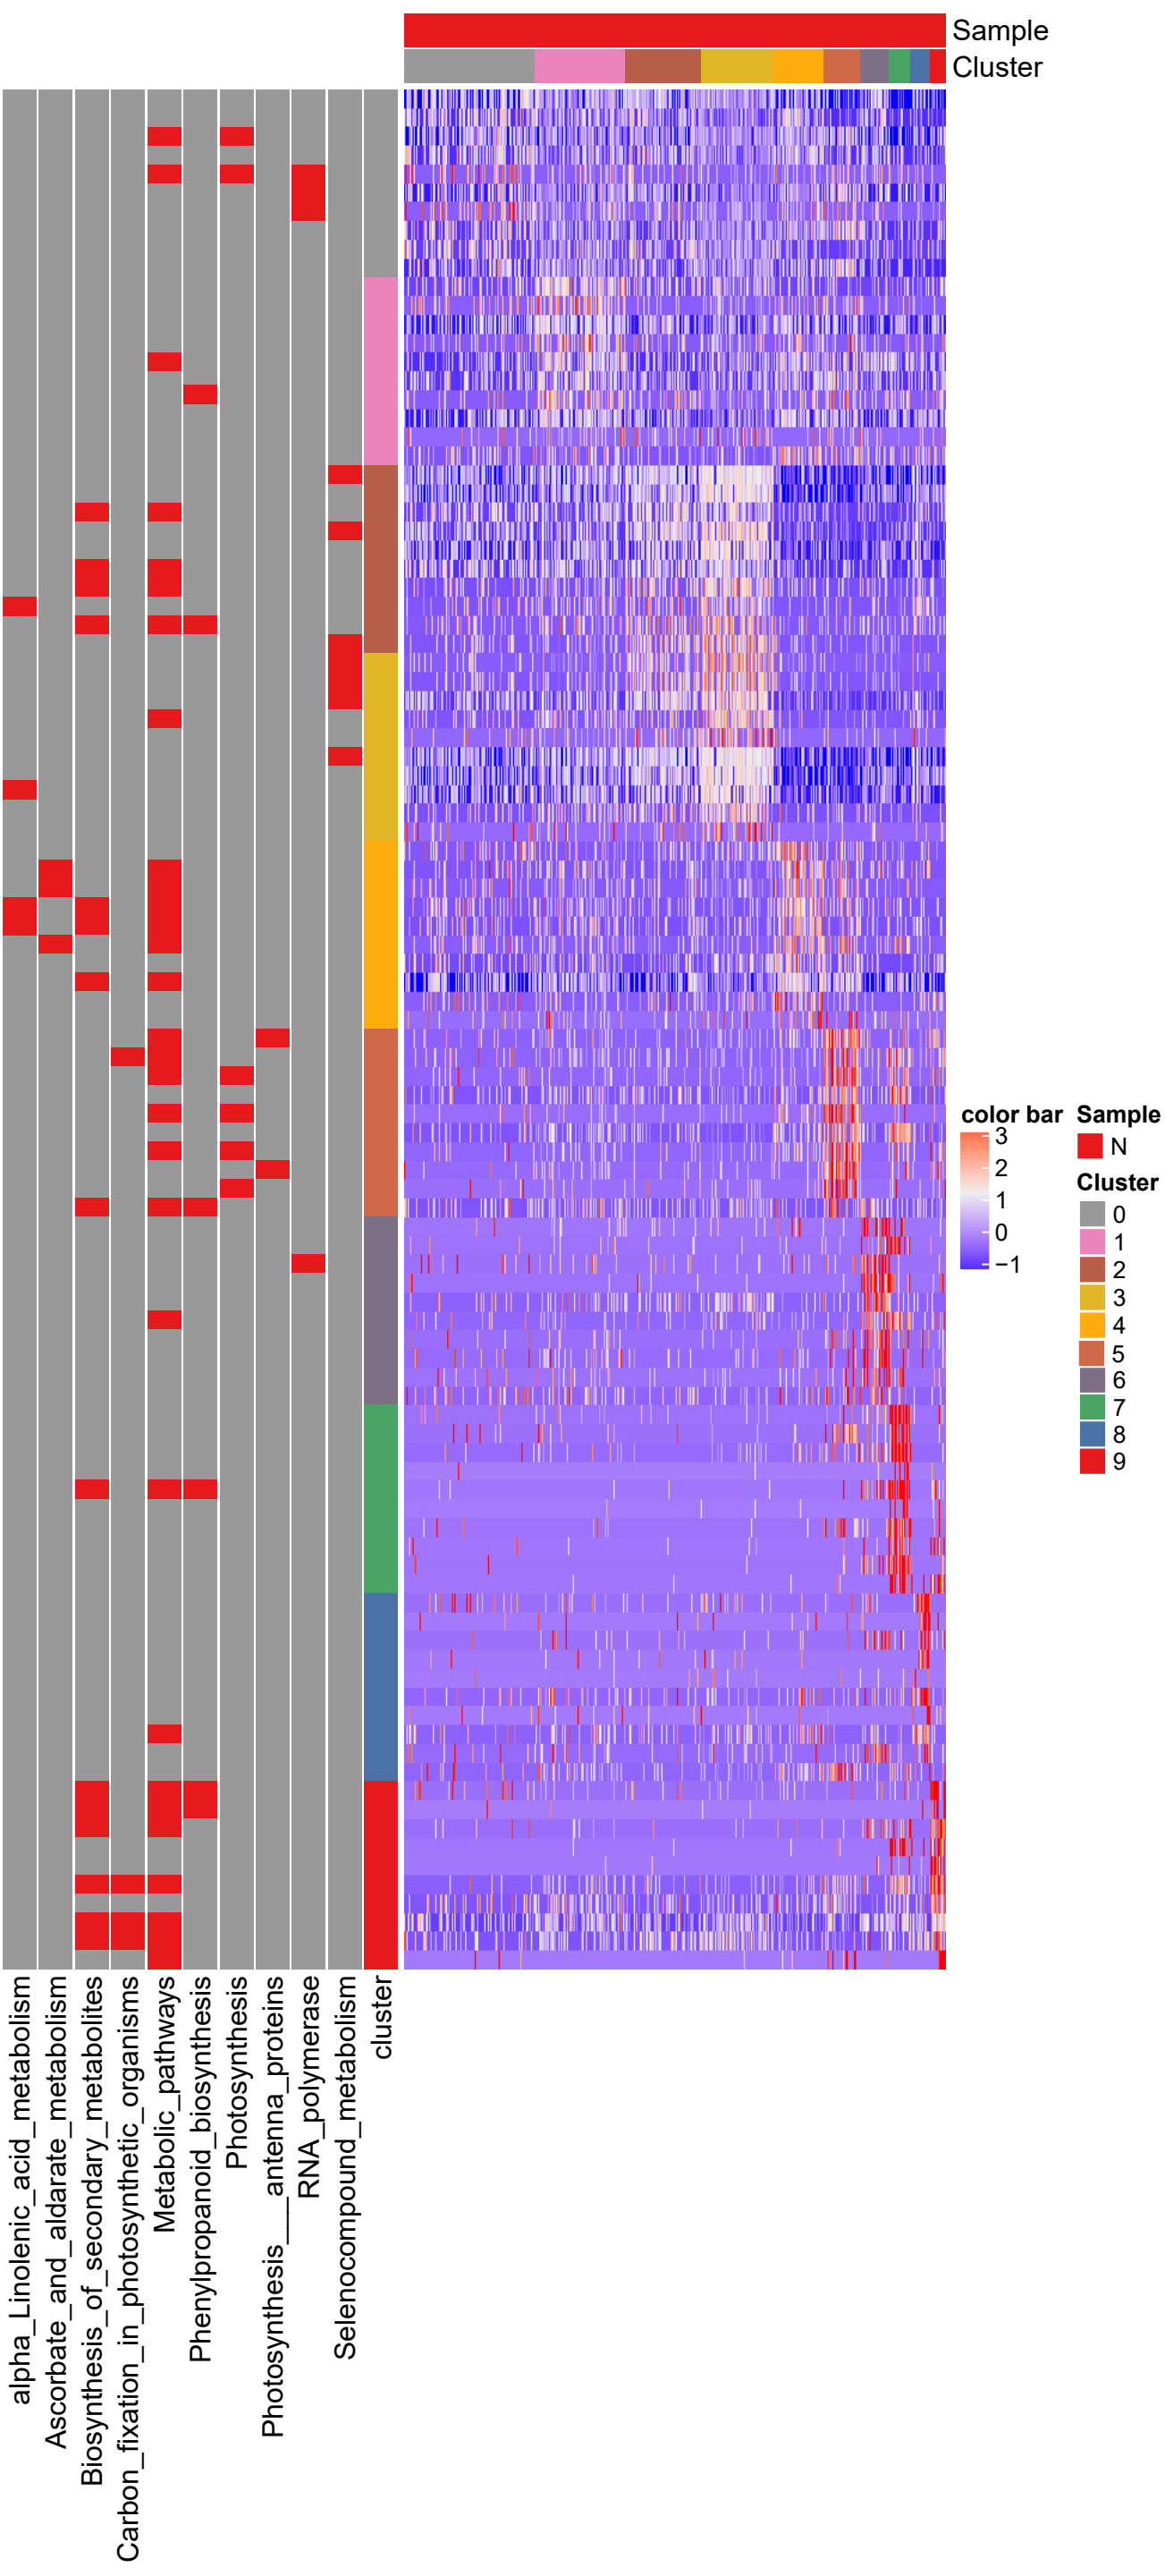

Supplement: s1 [file s1 › Figure S8.pdf]

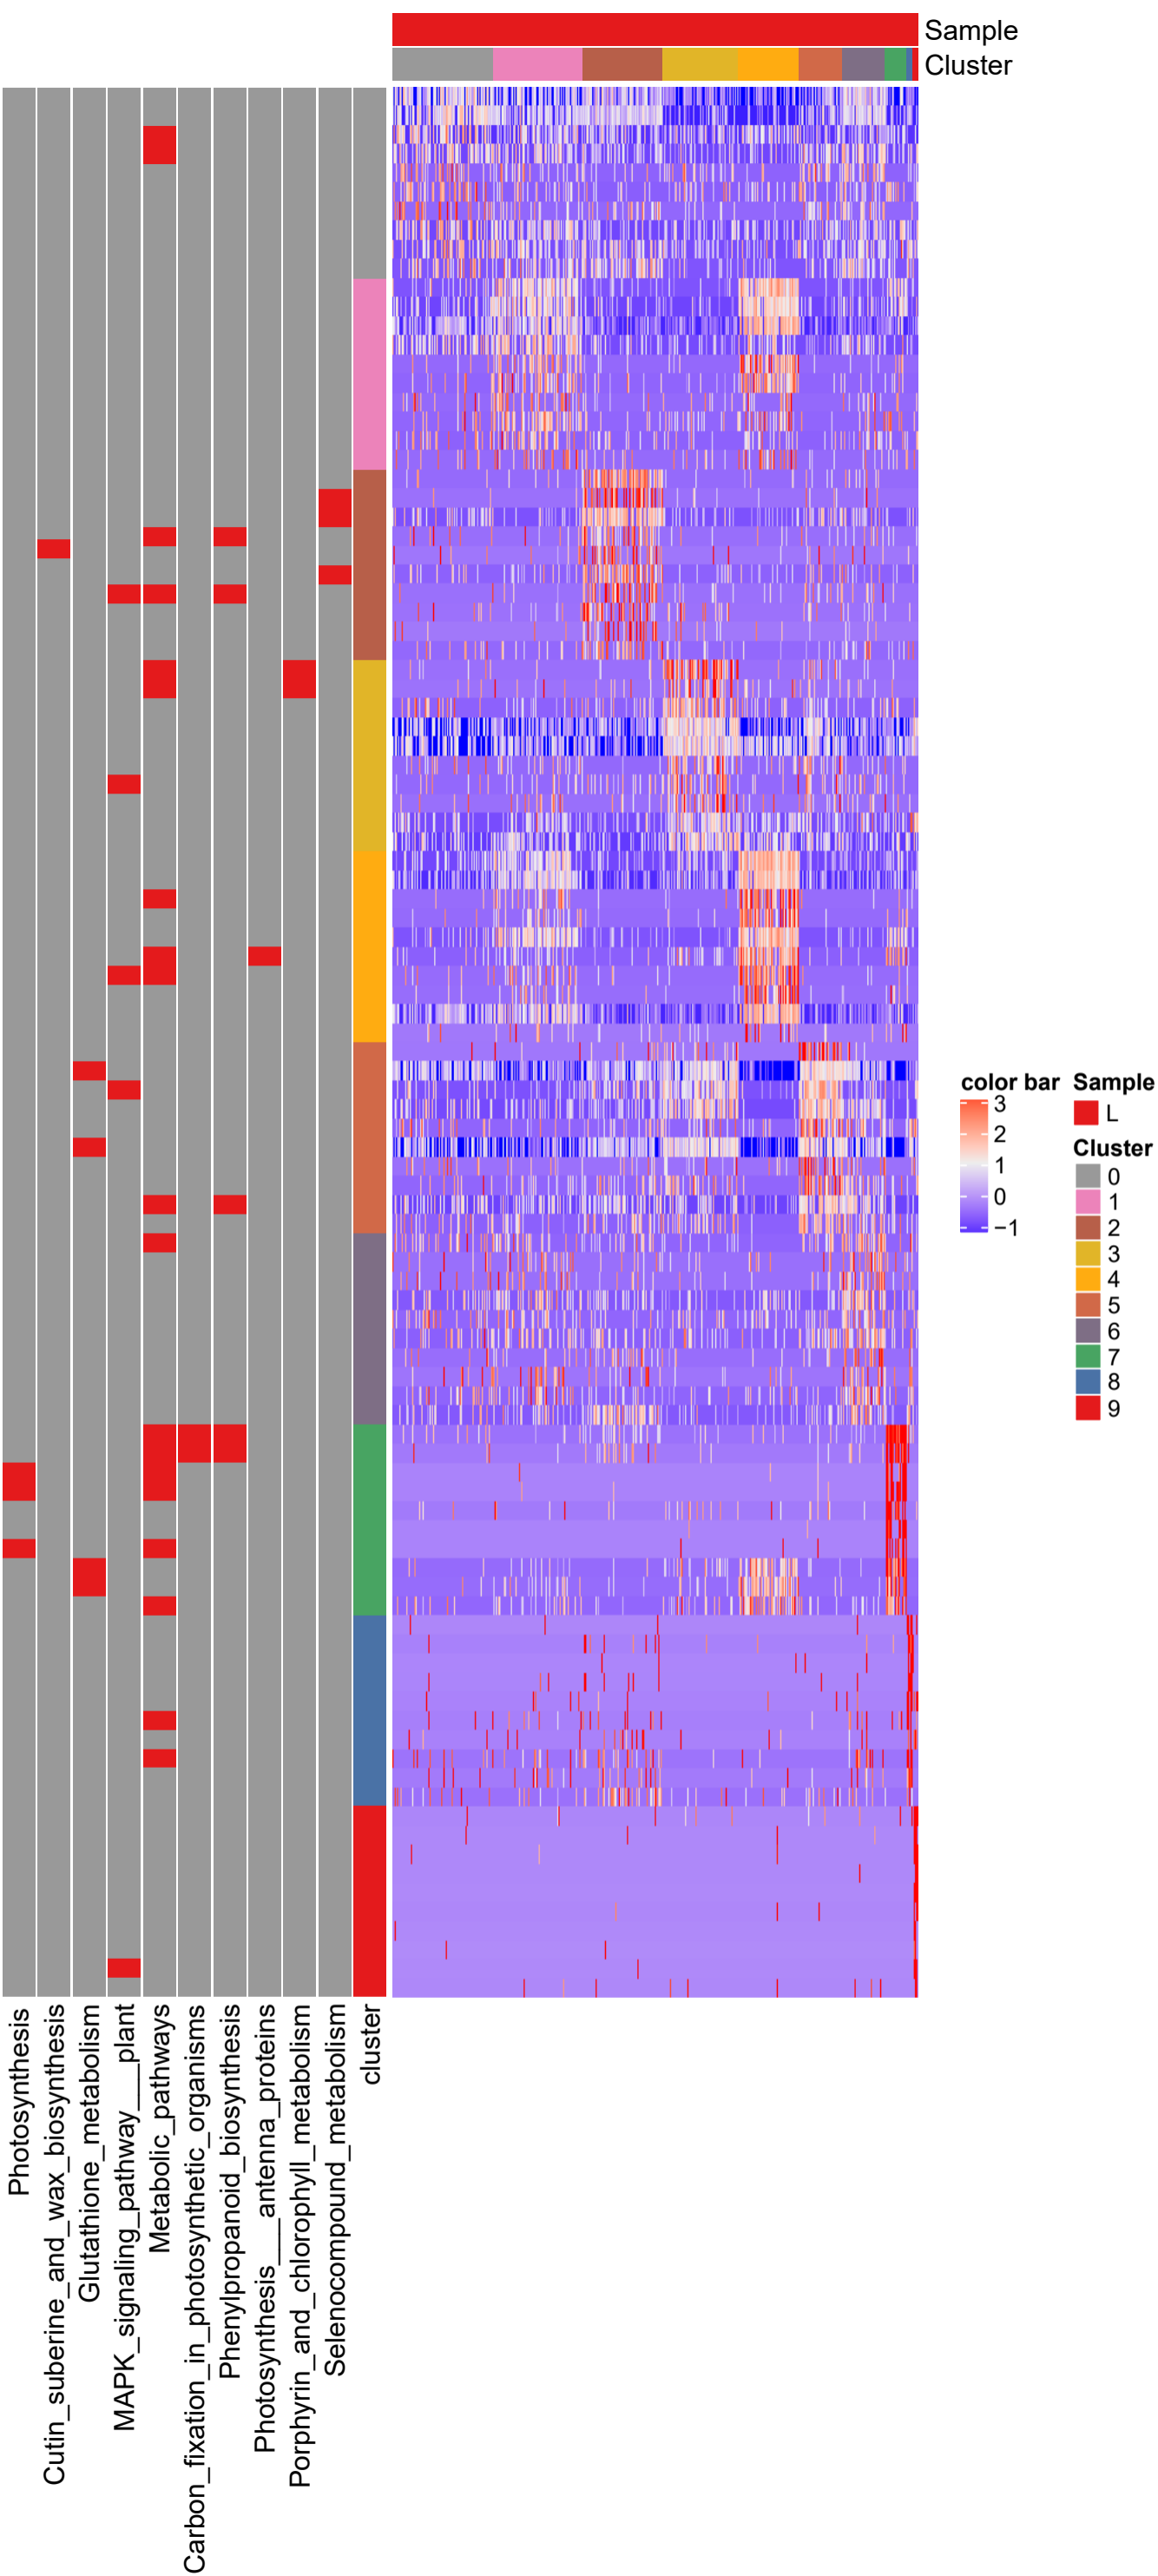

Supplement: s1 [file s1 › Figure S9.pdf]
